# Supplementary material
Source: PubMed Central journal article supplement (PMC4657442)
Supplement: NIHMS734891-supplement-Supporting_Information.pdf [file NIHMS734891-supplement-Supporting_Information.pdf]

# **Bond-Weakening Catalysis: Conjugate Aminations Enabled by the Soft Homolysis of Strong N-H Bonds**

Kyle T. Tarantino, David C. Miller, Ted A. Callon, Robert R. Knowles\*

*Department of Chemistry, Princeton University, Princeton, New Jersey 08540*

correspondence to: [rknowles@princeton.edu](mailto:rknowles@princeton.edu)

## **Supporting Information**

| <b><i>Table of Contents</i></b>                            | <b><i>Page</i></b> |
|------------------------------------------------------------|--------------------|
| Materials and Methods                                      | S2                 |
| Synthesis and Characterization of Substrates               | S3                 |
| Synthesis and Characterization of Products                 | S13                |
| <sup>1</sup> H and <sup>13</sup> C NMR Spectra of Products | S18                |
| Kinetic Experiments                                        | S35                |
| Computational Evaluation of Bond Weakening                 | S106               |
| EPR Experiments                                            | S184               |
| CV Experiments                                             | S187               |

## I. Materials and Methods

### General Information

Commercial reagents were purified prior to use following the guidelines of Perrin and Armarego.<sup>1</sup> All solvents were purified according to the method of Grubbs.<sup>2</sup> Organic solutions were concentrated under reduced pressure on a Büchi rotary evaporator. Chromatographic purification of products was accomplished by flash chromatography on Silicycle F60 silica gel according to the method of Still.<sup>3</sup> Thin-layer chromatography (TLC) was performed on Silicycle 250 µm silica gel plates. Visualization of the developed chromatogram was performed by fluorescence quenching, and potassium permanganate or ceric ammonium molybdate stain. <sup>1</sup>H and <sup>13</sup>C NMR spectra were recorded on a Bruker 500 (500 and 125 MHz) instrument, and are internally referenced to residual solvent signals (note: CDCl<sub>3</sub> referenced at δ 7.27 and 77.0 ppm respectively). Data for <sup>1</sup>H NMR are reported as follows: chemical shift (δ ppm), integration, multiplicity (s = singlet, d = doublet, t = triplet, q = quartet, m = multiplet), coupling constant (Hz) and assignment. Data for <sup>13</sup>C NMR are reported in terms of chemical shift and no special nomenclature is used for equivalent carbons. IR spectra were recorded on a Perkin Elmer Paragon 1000 spectrometer and are reported in terms of frequency of absorption (cm<sup>-1</sup>). High-resolution mass spectra were obtained at Princeton University mass spectrometry facilities using an Agilent 6210 TOF LC/MS. Gas chromatography-mass spectrometry (GC-MS) was performed on an Agilent 6890 GC-5975C MSD.

### General Procedure for Bond Weakening Reactions

#### Method A (reaction optimization):

An oven-dried 2-dram vial in an inert atmosphere glovebox was charged with a magnetic stir bar, substrate (0.05 mmol, 1.0 equiv), Cp\*<sub>2</sub>Ti<sup>III</sup>Cl (0.005 mmol, 0.1 equiv), TEMPO (0.005 mmol, 0.1 equiv). The flask was closed with a septa and sealed with electrical tape. 1 mL degassed anhydrous solvent was added and the reaction was stirred at room temperature. The reaction removed from the glovebox and quenched by addition of 1 mL H<sub>2</sub>O. The reaction was extracted with 2 mL ethyl acetate, filtered through a pipette containing ¾ inch of silica gel, and rinsed with ethyl acetate. The solvent was removed by rotary evaporation under reduced pressure to give a crude residue, which was purified by preparative silica gel thin layer chromatography.

#### Method B (preparative scale):

A flame-dried round bottom flask (25 mL) was charged with a magnetic stir bar, starting material (0.5 mmol, 1.0 equiv), and pumped into a glovebox. Cp\*<sub>2</sub>Ti<sup>III</sup>Cl (0.005 mmol, 0.01 equiv), and TEMPO (0.005 mmol, 0.01 equiv) was added and the flask was capped with a septum. 10 mL of degassed anhydrous MeCN was added and the reaction was stirred at room temperature. After 1 h the reaction was removed from the glovebox. The reaction was concentrated under reduced pressure on a rotary evaporator. The crude material was purified by silica gel column chromatography (gradient from 100% hexane to 50% EtOAc/hexane) to obtain the named products.

---

<sup>1</sup> D. D. Perrin, W. L. F. Amarego, *Purification of Laboratory Chemicals* (Pergamon, Press, © Oxford, ed. 3, 1988).

<sup>2</sup> A. B. Pangborn, M. A. Giardello, R. H. Grubbs, R. K. Rosen, F. J. Timmers, *Organometallics* 1996, 15, 1518.

<sup>3</sup> Still, W. C.; Khan, M.; Mitra, A.; *J. Org. Chem.* **1978**, 43, 2923.

## II. Synthesis and Characterization of Substrates

### General procedure for the synthesis of carbamate substrates

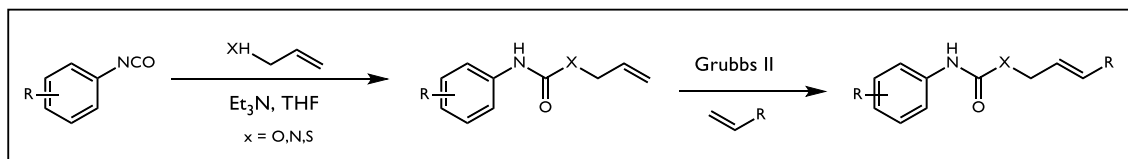

### Nucleophile additions to aryl isocyanates

A flame dried round bottom flask was charged with phenyl isocyanate (1.75 g, 14.7 mmol, 1.0 equiv), allyl alcohol (0.854 g, 14.7 mmol, 1.0 equiv) in THF (30 mL), flushed with Ar, and cooled to 0 °C. Triethylamine (1.48g, 2.05 mL, 14.7 mmol, 1.0 equiv) was added to the flask by syringe over 5 minutes. The homogeneous mixture was stirred for 90 minutes. After the reaction was complete, solvent was removed under reduced pressure to afford the desired products as crystalline white solids which were used without further purification.

### Olefin Metathesis

A flame dried round bottom flask was charged with allyl phenylcarbamate (2.46 g, 13.8 mmol, 1.0 equiv) in DCM (28 mL), methyl acrylate (6.29 mL, 69.4 mmol, 5.0 eq) and flushed with Ar. Grubbs second generation catalyst (0.589 g, 0.69 mmol, 0.05 equiv) was added in one portion and the reaction was stirred at room temperature under an atmosphere of Ar. The homogeneous solution was stirred for 6 hours. Once the reaction was complete, the reaction was concentrated to dryness under reduced pressure on a rotary evaporator. The crude material was purified by silica gel column chromatography (gradient from 100% hexane to 30% EtOAc/hexane) to obtain the desired substrates.

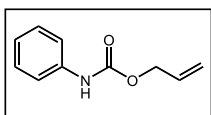

### Allyl phenylcarbamate

Followed general procedure using phenylisocyanate and allyl alcohol on 14.7 mmol scale and used without purification to give 2.46 g (94% yield) of Allyl phenylcarbamate as a white solid. <sup>1</sup>H NMR (500 MHz, Chloroform-d)  $\delta$  7.41 (d,  $J = 8.0$  Hz, 2H), 7.34 (t,  $J = 7.9$  Hz, 2H), 7.10 (t,  $J = 7.4$  Hz, 1H), 6.67 (s, 1H), 6.00 (ddt,  $J = 17.3, 10.9, 5.7$  Hz, 1H), 5.40 (dd,  $J = 17.3, 1.6$  Hz, 1H), 5.29 (dd,  $J = 10.5, 1.6$  Hz, 1H), 4.70 (d,  $J = 5.7$  Hz, 3H).; <sup>13</sup>C NMR (126 MHz, CDCl<sub>3</sub>)  $\delta$  137.75, 132.43, 129.33, 129.09, 123.53, 118.29, 65.87.; IR(Neat): 3303, 1722, 1701, 1596, 1534, 1501, 1488, 1442, 1315, 1301, 1224, 1161, 1054, 1027, 993, 936, 907, 743, 693 cm<sup>-1</sup>; MS (ESI) exact mass calculated for [M+H]<sup>+</sup> (C<sub>10</sub>H<sub>12</sub>O<sub>2</sub>N) requires  $m/z$  178.1, found  $m/z$  178.1.

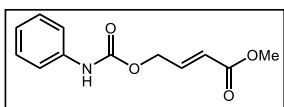

### 1-methyl (E)-4-((phenylcarbamoyl)oxy)but-2-enoate

Followed general procedure from allyl phenylcarbamate on 13.8 mmol scale and purified using silica gel chromatography to give 1.2 g (37% yield) of methyl (E)-4-((phenylcarbamoyl)oxy)but-2-enoate as a white solid. <sup>1</sup>H NMR (500 MHz, Chloroform-d)  $\delta$  7.39 (d,  $J = 8.1$  Hz, 2H),

7.33 (t,  $J = 7.6$  Hz, 2H), 7.09 (t,  $J = 7.3$  Hz, 1H), 7.00 (dt,  $J = 15.8, 4.2$  Hz, 1H), 6.74 - 6.63 (m, 1H), 6.08 (d,  $J = 15.8$  Hz, 1H), 4.85 (d,  $J = 4.1$  Hz, 2H), 3.76 (s, 3H).;  $^{13}\text{C}$  NMR (75 MHz,  $\text{CDCl}_3$ )  $\delta$  141.79, 129.12, 123.82, 121.69, 118.81, 63.25, 51.77.; IR(Neat) 3375, 2952, 1727, 1707, 1668, 1598, 1525, 1439, 1311, 1201, 1176, 1095, 1024, 957, 832, 754, 692  $\text{cm}^{-1}$ ; MS (ESI) exact mass calculated for  $[\text{M}+\text{H}]^+$  ( $\text{C}_{12}\text{H}_{14}\text{O}_4\text{N}$ ) requires  $m/z$  236.1, found  $m/z$  219.1.

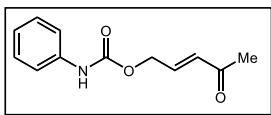

(E)-4-oxopent-2-en-1-yl phenylcarbamate

Followed general procedure from allyl phenylcarbamate and methyl vinyl ketone on 2.25 mmol scale and purified using silica gel chromatography to give 250 mg (51% yield) of E-4-oxopent-2n-1-yl phenylcarbamate as a white solid.  $^1\text{H}$  NMR (500 MHz, Chloroform- $d$ )  $\delta$  7.42 (d,  $J = 7.9$  Hz, 2H), 7.36 (t,  $J = 7.9$  Hz, 2H), 7.13 (t,  $J = 7.3$  Hz, 1H), 6.84 (dt,  $J = 16.1, 4.6$  Hz, 1H), 6.72 (s, 1H), 6.33 (dt,  $J = 16.2, 1.9$  Hz, 1H), 4.90 (dd,  $J = 4.6, 2.0$  Hz, 2H), 2.32 (s, 3H).;  $^{13}\text{C}$  NMR (126 MHz,  $\text{CDCl}_3$ )  $\delta$  197.75, 140.23, 130.82, 129.17, 123.88, 63.34, 27.36.; IR(Neat): 3365, 1710, 1664, 1597, 1529, 1442, 1366, 1315, 1227, 1103, 1014, 963, 746, 689  $\text{cm}^{-1}$ ; MS (ESI) exact mass calculated for  $[\text{M}+\text{H}]^+$  ( $\text{C}_{12}\text{H}_{14}\text{O}_3\text{N}$ ) requires  $m/z$  219.1, found  $m/z$  219.1.

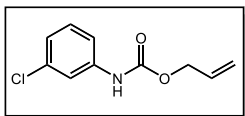

allyl (3-chlorophenyl)carbamate

Followed general procedure using 3-chlorophenylisocyanate and allyl alcohol on 16.4 mmol scale and used without purification to give 3.10 g (89% yield) of the titled compound as a clear oil.  $^1\text{H}$  NMR (500 MHz, Chloroform- $d$ )  $\delta$  7.51 (s, 1H), 7.23 - 7.19 (m, 2H), 7.07 - 7.01 (m, 1H), 6.66 (s, 1H), 5.96 (ddt,  $J = 17.2, 10.4, 5.8$  Hz, 1H), 5.37 (dq,  $J = 17.2, 1.5$  Hz, 1H), 5.28 (dq,  $J = 10.4, 1.3$  Hz, 1H), 4.67 (dt,  $J = 5.8, 1.4$  Hz, 2H).;  $^{13}\text{C}$  NMR (126 MHz,  $\text{CDCl}_3$ )  $\delta$  152.91, 138.97, 134.81, 132.17, 130.04, 123.56, 118.55, 66.10.; IR(Neat) 3315, 1705, 1593, 1527, 1484, 1425, 1273, 1212, 1054, 995, 876, 768, 678  $\text{cm}^{-1}$ ; MS (ESI) exact mass calculated for  $[\text{M}+\text{H}]^+$  ( $\text{C}_{10}\text{H}_{11}\text{ClO}_2\text{N}$ ) requires  $m/z$  212.1, found  $m/z$  212.1.

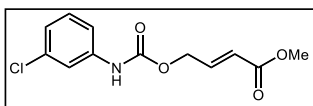

methyl (E)-4-(((3-chlorophenyl)carbamoyl)oxy)but-2-enoate

Followed general procedure from allyl (3-chlorophenyl)carbamate on 14.2 mmol scale and purified using silica gel chromatography to give 1.8 g (47% yield) of the titled compound as a white solid.  $^1\text{H}$  NMR (500 MHz, Chloroform- $d$ )  $\delta$  7.51 (s, 1H), 7.25 - 7.21 (m, 2H), 7.09 - 7.04 (m, 1H), 6.98 (dt,  $J = 15.8, 4.6$  Hz, 1H), 6.74 (s, 1H), 6.07 (dt,  $J = 15.8, 2.0$  Hz, 1H), 4.84 (dd,  $J = 4.6, 2.0$  Hz, 2H), 3.76 (s, 3H).;  $^{13}\text{C}$  NMR (126 MHz,  $\text{CDCl}_3$ )  $\delta$  166.29, 152.45, 141.58, 138.70, 134.83, 130.10, 123.82, 121.82, 118.83, 116.66, 63.43, 51.85.; IR(Neat) 3317, 2953, 1728, 1699, 1661, 1596, 1537, 1478, 1426, 1286, 1274, 1215, 1197, 1052, 1024, 942, 897, 869, 783, 766, 670  $\text{cm}^{-1}$ ; MS (ESI) exact mass calculated for  $[\text{M}+\text{H}]^+$  ( $\text{C}_{12}\text{H}_{13}\text{ClO}_4\text{N}$ ) requires  $m/z$  270.1, found  $m/z$  270.1.

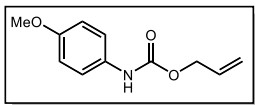

allyl (4-methoxyphenyl)carbamate

Followed general procedure using 4-methoxyphenylisocyanate and allyl alcohol on 15.4 mmol scale and used without purification to give 2.95 g (92% yield) of allyl (4-methoxyphenyl)carbamate as a white solid.  $^1\text{H}$  NMR (500 MHz, Chloroform-

*d*)  $\delta$  7.31 (d,  $J$  = 8.5 Hz, 2H), 6.88 (d,  $J$  = 8.8 Hz, 2H), 6.61 (s, 1H), 5.99 (ddt,  $J$  = 16.4, 11.0, 5.7 Hz, 1H), 5.38 (d,  $J$  = 17.2 Hz, 1H), 5.28 (d,  $J$  = 10.4 Hz, 1H), 4.68 (d,  $J$  = 5.6 Hz, 2H), 3.81 (s, 3H).;  $^{13}\text{C}$  NMR (126 MHz,  $\text{CDCl}_3$ )  $\delta$  156.01, 132.56, 130.78, 120.64, 118.14, 114.25, 65.78, 55.52.; IR (Neat) 3331, 2962, 2946, 1699, 1516, 1459, 1411, 1244, 1221, 1172, 1061, 1026, 995, 935, 818, 784, 769  $\text{cm}^{-1}$ ; MS (ESI) exact mass calculated for  $[\text{M}+\text{H}]^+$  ( $\text{C}_{11}\text{H}_{13}\text{O}_3\text{N}$ ) requires  $m/z$  208.1, found  $m/z$  208.1.

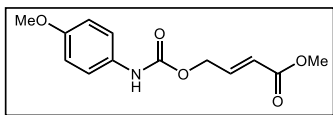

methyl (E)-4-(((4-methoxyphenyl)carbamoyl)oxy)but-2-enoate

Followed general procedure from allyl (4-methoxyphenyl)carbamate and methyl acrylate on 2.43 mmol scale and purified using silica gel chromatography to give 621 mg (97% yield) of methyl (E)-4-(((4-methoxyphenyl)carbamoyl)oxy)but-2-enoate as a white solid.  $^1\text{H}$  NMR (500 MHz, Chloroform-*d*)  $\delta$  7.37 - 7.30 (m, 2H), 7.01 (dt,  $J$  = 15.8, 4.5 Hz, 1H), 6.89 (d,  $J$  = 8.9 Hz, 2H), 6.60 (s, 1H), 6.10 (d,  $J$  = 15.7 Hz, 1H), 4.85 (dd,  $J$  = 4.5, 2.0 Hz, 2H), 3.82 (s, 3H), 3.78 (s, 3H).;  $^{13}\text{C}$  NMR (126 MHz,  $\text{CDCl}_3$ )  $\delta$  166.30, 156.22, 152.99, 141.98, 130.46, 121.56, 120.80, 114.31, 63.16, 55.52, 51.78.; IR (Neat) 3379, 3010, 1719, 1705, 1667, 1530, 1511, 1444, 1319, 1244, 1224, 1180, 1061, 1019, 953, 808, 761  $\text{cm}^{-1}$ ; MS (ESI) exact mass calculated for  $[\text{M}+\text{H}]^+$  ( $\text{C}_{13}\text{H}_{15}\text{O}_5\text{N}$ ) requires  $m/z$  266.1, found  $m/z$  266.1.

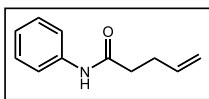

N-phenylpent-4-enamide

A flame dried 500 mL round bottom flask was charged with 50 mL anhydrous  $\text{Et}_2\text{O}$ .  $\text{MeMgBr}$  (17.5 mL, 3.0 M, 52.6 mmol, 2 equiv.) was added to the flask. Freshly distilled aniline (4.79 mL, 52.6 mmol, 2 equiv.) was dissolved in 50 mL  $\text{Et}_2\text{O}$  and added to the reaction dropwise via addition funnel over 30 min to rapidly stirred  $\text{MeMgBr}$  solution at room temperature. Once all aniline had been added, methyl pent-4-enoate (3.0 g, 26.3 mmol, 1.0 equiv.) was dissolved in 50 mL  $\text{Et}_2\text{O}$  and added via addition funnel over 30 minutes at room temperature. After addition was complete the reaction was allowed to stir at room temperature under Ar for 2 h. Once complete, the reaction was quenched by slow addition of 200 mL  $\text{H}_2\text{O}$ , followed by 50 mL 1 N  $\text{HCl}$ (aq). Organics were extracted with 3 x 150 mL ethyl acetate. Combined organics were dried over  $\text{Na}_2\text{SO}_4$  and concentrated. The titled compound was obtained as a beige solid and used without further purification. (3.95 g, 86%).  $^1\text{H}$  NMR (500 MHz, Chloroform-*d*)  $\delta$  7.50 (d,  $J$  = 7.9 Hz, 2H), 7.32 (t,  $J$  = 7.9 Hz, 2H), 7.21 (s, 1H), 7.10 (t,  $J$  = 7.4 Hz, 1H), 5.89 (ddt,  $J$  = 16.7, 10.4, 6.0 Hz, 1H), 5.13 (d,  $J$  = 16.7 Hz, 1H), 5.06 (d,  $J$  = 10.4 Hz, 1H), 2.54 - 2.41 (m, 4H).;  $^{13}\text{C}$  NMR (126 MHz,  $\text{CDCl}_3$ )  $\delta$  170.46, 137.81, 136.87, 129.02, 124.29, 119.79, 116.00, 36.87, 29.46.; IR (Neat) 3317, 1664, 1601, 1534, 1488, 1439, 1315, 1242, 1176, 919, 755  $\text{cm}^{-1}$ ; MS (ESI) exact mass calculated for  $[\text{M}+\text{H}]^+$  ( $\text{C}_{11}\text{H}_{14}\text{ON}$ ) requires  $m/z$  176.1, found  $m/z$  176.1.

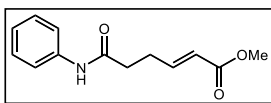

Methyl (E)-6-oxo-6-(phenylamino)hex-2-enoate

Followed general cross metathesis procedure from N-phenylpent-4-enamide on 5.71 mmol scale and purified using silica gel chromatography to give 1.22 g (92% yield) of the titled compound as a beige solid.  $^1\text{H}$  NMR (500 MHz, Chloroform-*d*)  $\delta$  7.50 (d,  $J$  = 7.9 Hz, 2H), 7.32 (t,  $J$  = 7.7 Hz, 2H), 7.23

- 7.17 (m, 1H), 7.11 (t,  $J = 7.5$  Hz, 1H), 7.00 (dt,  $J = 15.7, 6.8$  Hz, 1H), 5.91 (d,  $J = 15.7$  Hz, 1H), 3.73 (s, 3H), 2.65 (q,  $J = 7.1$  Hz, 3H), 2.51 (t,  $J = 7.4$  Hz, 2H).;  $^{13}\text{C}$  NMR (126 MHz,  $\text{CDCl}_3$ )  $\delta$  169.35, 166.83, 147.03, 137.61, 129.06, 124.47, 122.02, 119.84, 51.57, 35.60, 27.63.; IR(Neat) 3295, 3261, 1721, 1658, 1600, 1543, 1498, 1431, 1309, 1284, 1262, 1209, 1183, 1090, 1020, 969, 746, 717, 689  $\text{cm}^{-1}$ ; MS (ESI) exact mass calculated for  $[\text{M}+\text{H}]^+$  ( $\text{C}_{13}\text{H}_{16}\text{O}_3\text{N}$ ) requires  $m/z$  234.1, found  $m/z$  234.1.

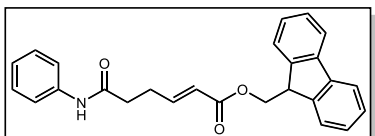

(9H-fluoren-9-yl)methyl (E)-6-oxo-6-(phenylamino)hex-2-enoate

(E)-methyl 6-oxo-6-(phenylamino)hex-2-enoate (500 mg, 2.14 mmol, 1.0 equiv), (9H-fluoren-9-yl)methanol (4.21 g, 21.4 mmol, 10 equiv), and Otera's Catalyst (51 mg, 0.043 mmol, 0.02 equiv) was added to 50 mL round bottom flask. Toluene (11 mL, 0.2 M) was added and the reaction was heated to reflux for 16 h. After, the reaction was cooled to room temperature, and concentrated to dryness under reduced pressure on a rotary evaporator. The crude solid was purified by flash column chromatography eluting with 30% EtOAc in Hexanes to afford the titled compound as a white solid. (220 mg, 26%)  $^1\text{H}$  NMR (500 MHz, Chloroform- $d$ )  $\delta$  7.79 (d,  $J = 7.6$  Hz, 2H), 7.61 (d,  $J = 7.5$  Hz, 2H), 7.53 (d,  $J = 7.9$  Hz, 2H), 7.42 (t,  $J = 7.5$  Hz, 2H), 7.39 - 7.29 (m, 4H), 7.24 (s, 1H), 7.15 (t,  $J = 7.4$  Hz, 1H), 7.09 (dt,  $J = 15.6, 6.8$  Hz, 1H), 6.04 (d,  $J = 15.7$  Hz, 1H), 4.45 (d,  $J = 7.4$  Hz, 2H), 4.27 (t,  $J = 7.3$  Hz, 1H), 2.72 (q,  $J = 7.6, 7.1$  Hz, 2H), 2.57 (t,  $J = 7.5$  Hz, 2H).;  $^{13}\text{C}$  NMR (126 MHz,  $\text{CDCl}_3$ )  $\delta$  169.33, 166.27, 147.59, 143.80, 141.28, 137.59, 129.09, 127.79, 127.11, 125.09, 124.51, 122.11, 120.04, 119.86, 66.44, 46.78, 35.60, 27.72.; IR(Neat) 3060, 1732, 1696, 1597, 1497, 1389, 1292, 1171, 758, 741  $\text{cm}^{-1}$ ; MS (ESI) exact mass calculated for  $[\text{M}+\text{H}]^+$  ( $\text{C}_{26}\text{H}_{23}\text{O}_3\text{N}$ ) requires  $m/z$  398.1, found  $m/z$  398.1.

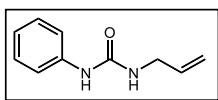

1-allyl-3-phenylurea

Followed general procedure using phenylisocyanate and allyl amine on 14.7 mmol scale and used without purification to give 2.22 g (86% yield) of allyl 1-allyl-3-phenylurea carbamate as a white solid.  $^1\text{H}$  NMR (500 MHz, Chloroform- $d$ )  $\delta$  7.59 (s, 1H), 7.35 - 7.20 (m, 4H), 7.10 - 6.99 (m, 1H), 5.83 (ddt,  $J = 14.7, 10.3, 5.3$  Hz, 1H), 5.19 (d,  $J = 17.1$  Hz, 1H), 5.10 (d,  $J = 10.0$  Hz, 1H), 3.81 (d,  $J = 5.3$  Hz, 2H).;  $^{13}\text{C}$  NMR (126 MHz,  $\text{CDCl}_3$ )  $\delta$  156.52, 138.79, 134.99, 129.07, 123.30, 120.48, 115.61, 42.53.; IR(Neat) 3340, 3293, 1631, 1561, 1506, 1238, 1039, 827, 679  $\text{cm}^{-1}$ ; HRMS (ESI) exact mass calculated for  $[\text{M}+\text{H}]^+$  ( $\text{C}_{10}\text{H}_{13}\text{N}_2\text{O}$ ) requires  $m/z$  176.09496, found  $m/z$  176.09582 difference 0.81 ppm.

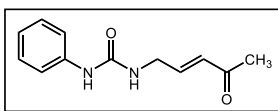

(E)-1-(4-oxopent-2-en-1-yl)-3-phenylurea

Followed the general cross metathesis procedure using 1-allyl-3-phenylurea (1.0 g, 5.67 mmol) to furnish 260 mg (20% yield) of the titled compound as a beige solid.  $^1\text{H}$  NMR (500 MHz, Chloroform- $d$ )  $\delta$  7.49 (d,  $J = 7.7$  Hz, 2H), 7.38 (t,  $J = 8.0$  Hz, 2H), 7.23 (s, 1H), 7.17 (t,  $J = 7.4$  Hz, 1H), 7.06 - 7.03 (m, 1H), 6.21 (t,  $J = 3.1$  Hz, 1H), 6.04 - 6.00 (m, 1H), 2.52 (d,  $J = 1.1$  Hz, 3H).;  $^{13}\text{C}$  NMR (126 MHz,  $\text{CDCl}_3$ )  $\delta$  129.25, 124.81, 120.16, 117.66, 111.77, 111.15, 14.68.; IR(Neat) 3316, 1722, 1634, 1598, 1546, 1499, 1443, 1434, 1314, 1300,

1280, 1192, 1167, 1013, 754, 662  $\text{cm}^{-1}$ ; MS (ESI) exact mass calculated for  $[\text{M}+\text{H}]^+$  ( $\text{C}_{13}\text{H}_{17}\text{O}_2\text{N}_2$ ) requires  $m/z$  233.1, found  $m/z$  233.1.

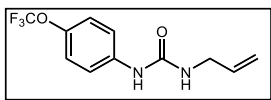

1-allyl-3-(4-(trifluoromethoxy)phenyl)urea

Followed general procedure using 4-trifluoromethoxyphenylisocyanate and allyl amine on 6.63 mmol scale and used without purification to give 940 mg (54% yield) of 1-allyl-3-(4-(trifluoromethoxy)phenyl)urea as a white solid.  $^1\text{H}$  NMR (500 MHz, Chloroform-*d*)  $\delta$  7.30 (d,  $J = 8.9$  Hz, 2H), 7.08 (d,  $J = 8.5$  Hz, 2H), 5.84 (ddt,  $J = 17.7, 10.5, 5.3$  Hz, 1H), 5.19 (d,  $J = 17.2$  Hz, 1H), 5.11 (d,  $J = 10.3$  Hz, 1H), 3.83 (d,  $J = 5.3$  Hz, 2H).;  $^{13}\text{C}$  NMR (126 MHz,  $\text{CDCl}_3$ )  $\delta$  155.54, 144.95, 137.14, 134.65, 121.96, 121.58, 116.27, 42.88.; IR(Neat: 3316, 1631, 1214, 1203, 1151, 1103, 933  $\text{cm}^{-1}$ ; HRMS (ESI) exact mass calculated for  $[\text{M}+\text{H}]^+$  ( $\text{C}_{11}\text{H}_{12}\text{F}_3\text{N}_2\text{O}_2$ ) requires  $m/z$  260.00726, found  $m/z$  260.07745 difference 0.73 ppm.

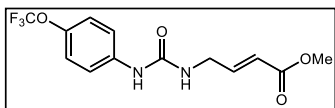

methyl (E)-4-(3-(4-(trifluoromethoxy)phenyl)ureido)but-2-enoate

Followed the general cross metathesis procedure using 1-allyl-3-(4-(trifluoromethoxy)phenyl)urea (0.922 g, 3.54 mmol) to furnish 350 mg (31% yield) of the titled compound as a beige solid.  $^1\text{H}$  NMR (500 MHz, Chloroform-*d*)  $\delta$  7.36 (d,  $J = 9.0$  Hz, 2H), 7.18 (d,  $J = 8.4$  Hz, 2H), 6.97 (dt,  $J = 15.7, 4.9$  Hz, 1H), 6.77 (s, 1H), 5.99 (dd,  $J = 15.7, 1.8$  Hz, 1H), 4.08 (d,  $J = 4.8$  Hz, 2H), 3.76 (s, 3H).;  $^{13}\text{C}$  NMR (126 MHz,  $\text{CDCl}_3$ )  $\delta$  166.63, 155.05, 145.03, 136.89, 122.04, 121.75, 121.19, 51.80, 40.98.; IR(Neat) 3361, 1717, 1664, 1655, 1559, 1503, 1248, 1226, 1199, 1155, 841, 708  $\text{cm}^{-1}$ ; HRMS (ESI) exact mass calculated for  $[\text{M}+\text{H}]^+$  ( $\text{C}_{13}\text{H}_{14}\text{F}_3\text{N}_2\text{O}_4$ ) requires  $m/z$  318.08274, found  $m/z$  318.08317 difference 1.35 ppm.

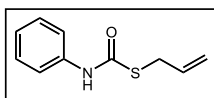

S-allyl phenylcarbamothioate

Followed general procedure using phenylisocyanate and allyl mercaptan on 14.7 mmol scale and used without purification to give 2.74 g (96% yield) of S-allyl phenylcarbamothioate as a white solid.  $^1\text{H}$  NMR (500 MHz, Chloroform-*d*)  $\delta$  7.34 (d,  $J = 7.8$  Hz, 2H), 7.24 (t,  $J = 7.9$  Hz, 2H), 7.04 (t,  $J = 7.3$  Hz, 1H), 7.02 (s, 1H), 5.83 (ddt,  $J = 16.9, 10.0, 6.9$  Hz, 1H), 5.21 (dd,  $J = 17.0, 1.5$  Hz, 1H), 5.06 (dd,  $J = 10.0, 1.4$  Hz, 1H), 3.57 (d,  $J = 7.1$  Hz, 2H).;  $^{13}\text{C}$  NMR (126 MHz,  $\text{CDCl}_3$ )  $\delta$  133.65, 129.17, 124.55, 117.90, 33.10.; IR(Neat) 3325, 1657, 1596, 1522, 1497, 1440, 1308, 1235, 1156, 742, 687, 671  $\text{cm}^{-1}$ ; HRMS (ESI) exact mass calculated for  $[\text{M}+\text{H}]^+$  ( $\text{C}_{10}\text{H}_{12}\text{NOS}$ ) requires  $m/z$  193.05613, found  $m/z$  193.05625 difference 0.03 ppm.

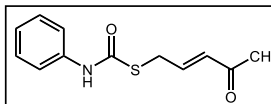

(E)-S-(4-oxopent-2-en-1-yl) phenylcarbamothioate

Followed the general cross metathesis procedure using S-allyl phenylcarbamothioate (0.500 g, 2.59 mmol) to furnish 260 mg (43% yield) of the titled compound as a beige solid.  $^1\text{H}$  NMR (500 MHz, Chloroform-*d*)  $\delta$  7.43 (d,  $J = 7.7$  Hz, 2H), 7.39 – 7.34 (m, 2H), 7.17 (t,  $J = 7.5$  Hz, 1H), 7.08 (s, 1H), 6.80 (dt,  $J = 15.8, 7.1$  Hz, 1H), 6.27 (d,  $J = 15.8$  Hz, 1H), 3.78 (dd,  $J = 7.1, 1.4$  Hz, 2H), 2.29 (s, 3H).;  $^{13}\text{C}$  NMR (126 MHz,  $\text{CDCl}_3$ )  $\delta$  141.82, 132.67, 129.45, 129.26, 121.55, 31.30, 27.23.; IR(Neat) 3325, 1673, 1659, 1598, 1535, 1497,

1442, 1434, 1257, 1235, 1148, 972, 880, 748, 687  $\text{cm}^{-1}$ ; HRMS (ESI) exact mass calculated for  $[\text{M}+\text{H}]^+$  ( $\text{C}_{12}\text{H}_{14}\text{NO}_2\text{S}$ ) requires  $m/z$  235.0667, found  $m/z$  235.06708 difference 1.62 ppm.

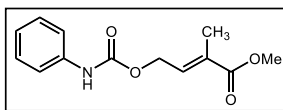

(E)-S-(4-oxopent-2-en-1-yl) phenylcarbamothioate

Followed the general cross metathesis procedure using allyl phenylcarbamate (0.500 g, 2.80 mmol) and methyl methacrylate to furnish 23 mg (3% yield) of the titled compound as a beige solid.  $^1\text{H}$  NMR (500 MHz, Chloroform-*d*)  $\delta$  7.31 (d,  $J$  = 8.0 Hz, 2H), 7.24 (t,  $J$  = 7.9 Hz, 2H), 7.01 (tt,  $J$  = 7.1, 1.2 Hz, 1H), 6.73 (tq,  $J$  = 6.2, 1.4 Hz, 1H), 6.66 (s, 1H), 4.78 (dd,  $J$  = 6.3, 1.4 Hz, 2H), 3.69 (s, 3H), 1.85 (d,  $J$  = 1.4 Hz, 3H).; IR(Neat) 2983, 1721, 1696, 1597, 1536, 1442, 1315, 1229, 1085, 1047, 1026, 987, 744, 693  $\text{cm}^{-1}$ ; MS (ESI) exact mass calculated for  $[\text{M}+\text{H}]^+$  ( $\text{C}_{13}\text{H}_{15}\text{O}_4\text{N}$ ) requires  $m/z$  250.1, found  $m/z$  250.1.

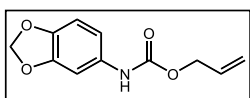

allyl benzo[d][1,3]dioxol-5-ylcarbamate

Followed general procedure using 5-isocyanatobenzo[d][1,3]dioxole and allyl alcohol on 6.13 mmol scale and used without purification to give 1.33 g (98% yield) of allyl benzo[d][1,3]dioxol-5-ylcarbamate as a white solid.  $^1\text{H}$  NMR (500 MHz, Chloroform-*d*)  $\delta$  7.11 (s, 1H), 6.75 (d,  $J$  = 8.4 Hz, 1H), 6.70 (d,  $J$  = 8.5 Hz, 1H), 6.54 (s, 1H), 6.04 - 5.92 (m, 3H), 5.38 (dd,  $J$  = 17.3, 1.3 Hz, 1H), 5.28 (dd,  $J$  = 10.3, 1.3 Hz, 1H), 4.67 (d,  $J$  = 5.7 Hz, 2H).;  $^{13}\text{C}$  NMR (126 MHz,  $\text{CDCl}_3$ )  $\delta$  147.97, 132.45, 118.26, 108.11, 101.26, 65.86.; IR(Neat) 3317, 1701, 1540, 1502, 1488, 1450, 1435, 1202, 1140, 1103, 1034, 926, 792  $\text{cm}^{-1}$ ; MS (ESI) exact mass calculated for  $[\text{M}+\text{H}]^+$  ( $\text{C}_{11}\text{H}_{12}\text{O}_4\text{N}$ ) requires  $m/z$  222.1, found  $m/z$  222.1.

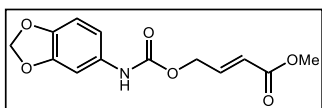

methyl (E)-4-((benzo[d][1,3]dioxol-5-ylcarbamoyl)oxy)but-2-enoate

Followed general cross metathesis procedure using allyl benzo[d][1,3]dioxol-5-ylcarbamate and methyl acrylate on 6.03 mmol scale to give 0.500 g (30% yield) of allyl benzo[d][1,3]dioxol-5-ylcarbamate as a white solid.  $^1\text{H}$  NMR (500 MHz, Chloroform-*d*)  $\delta$  7.08 (s, 1H), 6.98 (dt,  $J$  = 15.8, 4.5 Hz, 1H), 6.74 (d,  $J$  = 8.3 Hz, 1H), 6.69 (d,  $J$  = 8.1 Hz, 1H), 6.63 (s, 1H), 6.06 (d,  $J$  = 15.8 Hz, 1H), 5.95 (s, 2H), 4.82 (dd,  $J$  = 4.7, 2.0 Hz, 2H), 3.76 (s, 3H).;  $^{13}\text{C}$  NMR (126 MHz,  $\text{CDCl}_3$ )  $\delta$  166.28, 152.87, 148.02, 141.85, 121.63, 112.08, 108.16, 101.32, 63.24, 51.80.; IR(Neat) 3314, 3095, 2901, 1730, 1702, 1667, 1558, 1493, 1447, 1431, 1320, 1259, 1215, 1201, 1183, 1143, 1049, 1034, 929, 858, 791, 685  $\text{cm}^{-1}$ ; MS (ESI) exact mass calculated for  $[\text{M}+\text{H}]^+$  ( $\text{C}_{13}\text{H}_{14}\text{O}_6\text{N}$ ) requires  $m/z$  280.1, found  $m/z$  280.1.

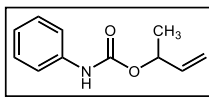

but-3-en-2-yl phenylcarbamate

Followed general procedure using phenylisocyanate and but-3-en-2-ol on 18.3 mmol scale and purified by flash column chromatography (2% EtOAc in Hexanes to 20% EtOAc in Hexanes over 10 column volumes) to give 1.25 g (36% yield) of but-3-en-2-yl phenylcarbamate as a white solid.  $^1\text{H}$  NMR (500 MHz, Chloroform-*d*)  $\delta$  7.38 (d,  $J$  = 8.0 Hz, 2H), 7.33 - 7.28 (m, 2H), 7.06 (tt,  $J$  = 7.4, 1.2 Hz, 1H), 6.60 (s, 1H), 5.90 (ddd,  $J$  = 17.3, 10.5, 5.9 Hz, 1H), 5.40 - 5.33 (m, 1H), 5.30 (dt,  $J$  = 17.3, 1.3 Hz, 1H), 5.17 (dt,  $J$  = 10.6, 1.2 Hz, 1H), 1.38 (d,  $J$  = 6.5 Hz, 3H).;  $^{13}\text{C}$  NMR



(126 MHz, CDCl<sub>3</sub>)  $\delta$  152.85, 137.90, 137.82, 129.05, 123.38, 118.57, 115.91, 71.97, 20.16.; IR(Neat) 3303, 2983, 1721, 1696, 1597, 1536, 1442, 1315, 1229, 1085, 1047, 1026, 987, 744, 693 cm<sup>-1</sup>; MS (ESI) exact mass calculated for [M+H]<sup>+</sup> (C<sub>11</sub>H<sub>14</sub>O<sub>2</sub>N) requires  $m/z$  192.1, found  $m/z$  192.1.

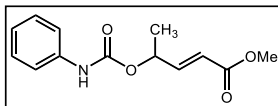

methyl (E)-4-((phenylcarbamoyl)oxy)pent-2-enoate

Followed general cross metathesis procedure using but-3-en-2-yl phenylcarbamate and methyl acrylate on 2.61 mmol scale to give 0.260 g (40% yield) of methyl (E)-4-((phenylcarbamoyl)oxy)pent-2-enoate as a white solid. <sup>1</sup>H NMR (500 MHz, Chloroform-d)  $\delta$  7.38 (d,  $J$  = 8.0 Hz, 2H), 7.31 (t,  $J$  = 7.9 Hz, 2H), 7.08 (td,  $J$  = 7.3, 1.2 Hz, 1H), 6.94 (dd,  $J$  = 15.8, 4.9 Hz, 1H), 6.67 (s, 1H), 6.03 (dd,  $J$  = 15.7, 1.6 Hz, 1H), 5.55 - 5.48 (m, 1H), 3.75 (s, 3H), 1.42 (d,  $J$  = 6.7 Hz, 3H).; <sup>13</sup>C NMR (126 MHz, CDCl<sub>3</sub>)  $\delta$  166.55, 152.36, 146.78, 137.54, 129.12, 123.69, 120.59, 118.67, 69.77, 51.78, 19.90.; IR(Neat) 3303, 2983, 1721, 1696, 1597, 1536, 1442, 1315, 1229, 1085, 1047, 1026, 987, 744, 693 cm<sup>-1</sup>; MS (ESI) exact mass calculated for [M+H]<sup>+</sup> (C<sub>13</sub>H<sub>16</sub>O<sub>4</sub>N) requires  $m/z$  250.1, found  $m/z$  250.1.

Synthesis of methyl (E)-5-(2-((methoxycarbonyl)amino)phenyl)pent-2-enoate

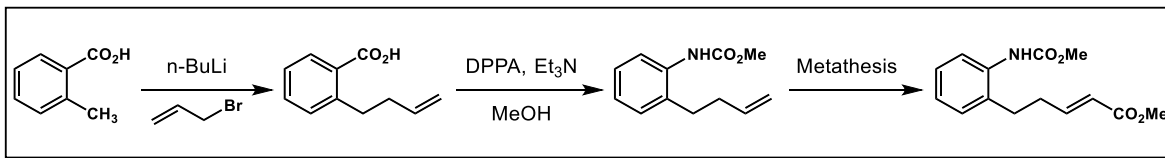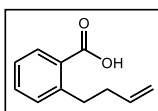

2-(but-3-en-1-yl)benzoic acid

Followed literature procedure.<sup>4</sup> 1.36 g 2-methylbenzoic acid gave 430 mg 2-(but-3-en-1-yl)benzoic acid (24% yield) as a white solid. Spectra matched literature reported values.

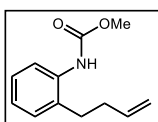

methyl (2-(but-3-en-1-yl)phenyl)carbamate

To a 100 mL flame dried round bottom flask charged with magnetic stir bar topped with reflux condenser was added 2-(but-3-en-1-yl)benzoic acid (425 mg, 2.41 mmol, 1 equiv.), 1,4-dioxane (4.8 mL, 0.5 M), triethylamine (0.672 mL, 4.82 mmol, 2 equiv.), methanol (0.976 mL, 24.12 mmol, 10 equiv.) and the reaction was heated to 100 °C. Diphenyl phosphorazidate (1.56 mL, 7.24 mmol, 3 equiv) was added dropwise over 10 minutes by syringe to the refluxing solution. The reaction was heated to 100 °C for 10 h. Once all starting material was consumed by TLC analysis (10% EtOAc/Hexanes) the reaction was cooled to room temperature and quenched by addition of 50 mL sat. aq. NaHCO<sub>3</sub>. Organics were extracted 3 x 50 mL EtOAc. Combined organics were washed with 50 mL sat. aq. NaHCO<sub>3</sub>, dried over Na<sub>2</sub>SO<sub>4</sub> and concentrated. Crude oil was purified by flash column chromatography (1% EtOAc/Hexanes to 10% EtOAc/Hexanes over 15 column volumes) to yield 257 mg (52% yield) of a colorless oil.

(4) Cheng, Y. A.; Chen, T. Tan, C. K.; Heng, J. J.; Yeung, Y. *J. Am. Chem. Soc.* **2012**, *134*, 16492

$^1\text{H}$  NMR (500 MHz, Chloroform-*d*)  $\delta$  7.25 - 7.20 (m, 2H), 7.17 (t,  $J = 6.7$  Hz, 2H), 7.09 (t,  $J = 7.4$  Hz, 1H), 5.86 (ddt,  $J = 16.9, 10.2, 6.7$  Hz, 1H), 5.08 (dd,  $J = 17.1, 1.7$  Hz, 1H), 5.03 (dd,  $J = 10.3, 1.5$  Hz, 1H), 3.78 (s, 3H), 2.69 - 2.63 (m, 2H), 2.39 - 2.31 (m, 2H).;  $^{13}\text{C}$  NMR (126 MHz,  $\text{CDCl}_3$ )  $\delta$  137.45, 135.20, 129.50, 127.02, 120.22, 115.77, 115.28, 52.46, 33.84, 30.81.; IR(Neat) 3317, 2953, 2172, 1708, 1639, 1589, 1522, 1453, 1352, 1296, 1220, 1184, 1064, 1046, 912, 768, 752  $\text{cm}^{-1}$ ; MS (ESI) exact mass calculated for  $[\text{M}+\text{H}]^+$  ( $\text{C}_{12}\text{H}_{16}\text{O}_2\text{N}$ ) requires  $m/z$  206.1, found  $m/z$  206.1.

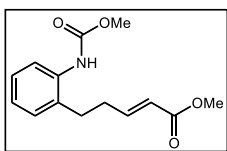

methyl (E)-5-(2-((methoxycarbonyl)amino)phenyl)pent-2-enoate

Followed the general cross metathesis procedure using ethyl (2-(but-3-en-1-yl)phenyl)carbamate (0.257 g, 1.25 mmol) and methyl acrylate to furnish 260 mg (79% yield) of the titled compound as a beige solid.  $^1\text{H}$  NMR (500 MHz, Chloroform-*d*)  $\delta$  7.58 (s, 1H), 7.19 - 7.14 (m, 1H), 7.12 - 7.07 (m, 1H), 7.04 (t,  $J = 7.5$  Hz, 1H), 6.92 (dtd,  $J = 15.4, 6.9, 1.4$  Hz, 1H), 6.30 (d,  $J = 29.9$  Hz, 1H), 5.79 (dd,  $J = 15.7, 1.7$  Hz, 1H), 3.70 (s, 3H), 3.66 (s, 3H), 2.66 (dd,  $J = 8.9, 6.8$  Hz, 2H), 2.43 (tdd,  $J = 9.8, 5.5, 2.3$  Hz, 2H).;  $^{13}\text{C}$  NMR (126 MHz,  $\text{CDCl}_3$ )  $\delta$  166.86, 154.69, 147.67, 135.11, 135.09, 129.30, 127.37, 127.34, 121.86, 121.82, 52.54, 51.55, 32.14, 29.77.; IR(Neat) 2952, 1734, 1696, 1492, 1437, 1318, 1282, 1191, 1130, 763  $\text{cm}^{-1}$ ; HRMS (ESI) exact mass calculated for  $[\text{M}+\text{H}]^+$  ( $\text{C}_{14}\text{H}_{18}\text{NO}_4$ ) requires  $m/z$  263.11576, found  $m/z$  263.11599 difference 0.80 ppm.

Synthesis of methyl (E)-3-methyl-4-((phenylcarbamoyl)oxy)but-2-enoate

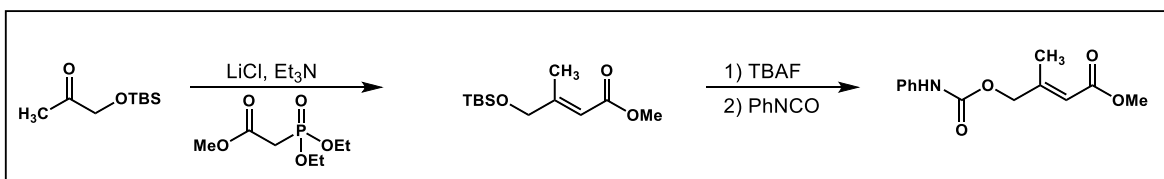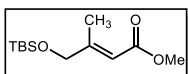

methyl (E)-4-((tert-butyldimethylsilyl)oxy)-3-methylbut-2-enoate

To a flame dried 250 mL round bottom flask charged with magnetic stirbar was added 1-((tert-butyldimethylsilyl)oxy)propan-2-one (5.0 g, 26.5 mmol, 1.0 equiv), methyl 2-(diethoxyphosphoryl)acetate (5.77 mL, 6.70 g, 31.9 mmol, 1.2 equiv.), lithium chloride (5.63 g, 133 mmol, 5.0 equiv.), and triethylamine (18.5 mL, 13.4 g, 133 mmol, 5 equiv.). THF (53 mL, 0.5 M) was added and the mixture was stirred at room temperature under an Ar atmosphere for 12 h. The reaction was quenched by addition of 50 mL  $\text{H}_2\text{O}$ . Organics were extracted 3 x 100 mL ethyl acetate. Combined organics were dried over  $\text{Na}_2\text{SO}_4$  and concentrated to dryness on a rotary evaporator. Crude oil was purified by flash column chromatography (50 g silica gel cartridge, gradient from 1% EtOAc in hexanes to 10% EtOAc in hexanes over 20 column volumes) to afford the titled compound as a 2:1 E:Z mixture of olefin isomers. The Z isomer is removed following TBS deprotection in a subsequent step. The product was obtained as a colorless oil (2.91 g, 44.8% yield).  $^1\text{H}$  NMR (500 MHz, Chloroform-*d*)  $\delta$  6.01 (s, 1H), 4.11 (s, 2H), 3.70 (s, 3H), 2.05 (s, 3H), 0.92 (s, 9H), 0.08 (s, 6H).;  $^{13}\text{C}$  NMR (126 MHz,  $\text{CDCl}_3$ )  $\delta$  167.60, 157.81, 112.95, 67.15, 51.03, 31.74, 26.00, 15.58, -5.32.;

IR(Neat) 3331, 2118, 1635, 1381  $\text{cm}^{-1}$ ; MS (ESI) exact mass calculated for  $[\text{M}+\text{H}]^+$  ( $\text{C}_{12}\text{H}_{24}\text{O}_3\text{Si}$ ) requires  $m/z$  245.1, found  $m/z$  245.1.

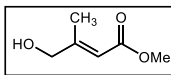

methyl (E)-4-hydroxy-3-methylbut-2-enoate

To a flame dried 100 mL round bottom flask charged with magnetic stirbar was added methyl (E)-4-((tert-butyldimethylsilyl)oxy)-3-methylbut-2-enoate (1.0 g, 4.09 mmol, 1.0 equiv.) and THF (12 mL, 0.35 M). The reaction was cooled to 0 °C and TBAF (8.18 mL, 1.0 M in THF, 2 equiv), was added via syringe. The reaction was allowed to stir for 1 h at 0 °C. After, the reaction was quenched by addition of 10 mL of aq. 1 M HCl. Organics were extracted 3 x 50 mL EtOAc, dried over  $\text{Na}_2\text{SO}_4$  and concentrated to dryness. Crude oil was dissolved in minimal hexanes and purified by flash column chromatography (5% EtOAc in hexanes to 40% EtOAc in hexanes) to afford a colorless oil. Spectra are consistent with literature reported values: *J. Org. Chem.* **2001**, 66, 2506-2508

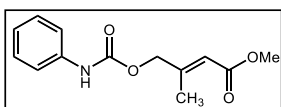

methyl (E)-3-methyl-4-((phenylcarbamoyl)oxy)but-2-enoate

Followed general procedure using phenylisocyanate and methyl (E)-4-hydroxy-3-methylbut-2-enoate on 2.29 mmol scale and purified by flash column chromatography (2% EtOAc in Hexanes to 30% EtOAc in Hexanes over 10 column volumes) to give 0.248 g (43% yield) of the titled compound as a white solid.  $^1\text{H}$  NMR (500 MHz, Chloroform-*d*)  $\delta$  7.39 (d,  $J = 7.7$  Hz, 2H), 7.35 - 7.29 (m, 2H), 7.09 (t,  $J = 7.3$  Hz, 1H), 6.72 (s, 1H), 5.91 (q,  $J = 1.5$  Hz, 1H), 4.70 - 4.63 (m, 2H), 3.72 (s, 3H), 2.17 (dd,  $J = 1.4, 0.7$  Hz, 3H).;  $^{13}\text{C}$  NMR (126 MHz,  $\text{CDCl}_3$ )  $\delta$  171.19, 166.65, 152.46, 137.44, 129.14, 128.61, 123.80, 115.00, 67.80, 51.16, 15.75.; IR(Neat) 3327, 2950, 1706, 1662, 1600, 1536, 1501, 1441, 1332, 1312, 1211, 1152, 1085, 1048, 1029, 852, 752, 691  $\text{cm}^{-1}$ ; MS (ESI) exact mass calculated for  $[\text{M}+\text{H}]^+$  ( $\text{C}_{13}\text{H}_{16}\text{O}_4\text{N}$ ) requires  $m/z$  250.1, found  $m/z$  250.1.

Synthesis of methyl (E)-4-(2-acetamidophenyl)but-2-enoate

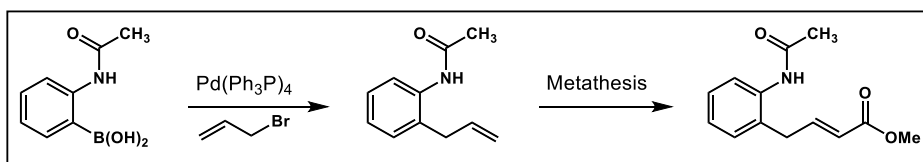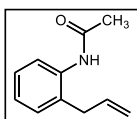

N-(2-allylphenyl)acetamide

To a 100 mL round bottom flask charged with magnetic stir bar 2-acetamidophenylboronic acid (0.93 g, 5.20 mmol, 1.0 equiv) was added. A reflux condenser was attached to the round bottom flask and the entire reaction apparatus was evacuated and backfilled with Ar 10 times. Anhydrous, degassed dimethoxyethane (22.6 mL, 0.23 M) was added, followed by allyl bromide (0.67 mL, 7.79 mmol, 1.5 equiv).  $\text{Na}_2\text{CO}_3$  (1.1 g, 10.4 mmol, 2.0 equiv) was dissolved in  $\text{H}_2\text{O}$  (5 mL) and degassed by sparging with Ar for 5 minutes. Sodium carbonate solution was added via syringe to degassed reaction mixture and the reaction was heated to reflux for

16 h. After, the reaction was cooled to room temperature and quenched by addition of 100 mL H<sub>2</sub>O. Organics were extracted with ethyl acetate (100 mL x 3), dried over Na<sub>2</sub>SO<sub>4</sub> and concentrated. Crude solid was dissolved in minimal DCM and purified by silica gel column chromatography (2% EtOAc in Hexanes to 40% EtOAc in Hexanes) to afford the titled compound as a beige solid. <sup>1</sup>H NMR (500 MHz, Chloroform-*d*) δ 7.84 (d, *J* = 8.0 Hz, 1H), 7.29 - 7.23 (m, 1H), 7.18 (d, *J* = 7.5 Hz, 1H), 7.11 (t, *J* = 7.5 Hz, 1H), 5.98 (ddt, *J* = 16.6, 10.2, 6.1 Hz, 1H), 5.19 (dd, *J* = 10.2, 2.3 Hz, 1H), 5.10 (dd, *J* = 16.6, 2.3 Hz, 1H), 3.39 (d, *J* = 6.1 Hz, 2H), 2.15 (s, 3H).; <sup>13</sup>C NMR (126 MHz, CDCl<sub>3</sub>) δ 168.25, 136.39, 136.08, 130.22, 129.78, 127.53, 125.32, 123.75, 116.57, 37.03, 24.36.; IR(Neat) 3276, 1654, 1585, 1530, 1481, 1447, 1368, 1295, 1269, 993, 914, 751, 710, 693 cm<sup>-1</sup>; MS (ESI) exact mass calculated for [M+H]<sup>+</sup> (C<sub>11</sub>H<sub>14</sub>NO) requires *m/z* 176.1, found *m/z* 176.1.

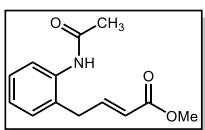

methyl (E)-4-(2-acetamidophenyl)but-2-enoate

Followed the general cross metathesis procedure N-(2-allylphenyl)acetamide (0.67 g, 3.71 mmol) and methyl acrylate to furnish 280 mg (23% yield) of the titled compound as a beige solid. <sup>1</sup>H NMR (500 MHz, Chloroform-*d*) δ 7.62 (d, *J* = 7.9 Hz, 1H), 7.32 - 7.27 (m, 1H), 7.18 (d, *J* = 4.5 Hz, 2H), 7.10 (dt, *J* = 15.6, 6.2 Hz, 1H), 6.93 (s, 1H), 5.76 (d, *J* = 15.7 Hz, 1H), 3.72 (s, 3H), 3.51 (dd, *J* = 6.1, 2.0 Hz, 2H), 2.17 (s, 3H).; <sup>13</sup>C NMR (126 MHz, CDCl<sub>3</sub>) δ 168.56, 166.59, 146.29, 135.33, 130.34, 130.31, 128.01, 126.40, 125.34, 122.36, 51.67, 34.75, 24.16.; IR(Neat) 3260, 1721, 1651, 1532, 1432, 1332, 1268, 1204, 1149, 1008, 980, 762, 705 cm<sup>-1</sup>; MS (ESI) exact mass calculated for [M+H]<sup>+</sup> (C<sub>13</sub>H<sub>15</sub>NO<sub>3</sub>) requires *m/z* 234.1, found *m/z* 234.1.

### III. Characterization of Products

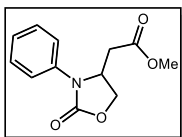

#### **5- methyl 2-(2-oxo-3-phenyloxazolidin-4-yl)acetate**

Followed Method B using ((E)-methyl 4-((phenylcarbamoyl)oxy)but-2-enoate (118 mg, 0.5 mmol) for 20 min and purified using silica gel chromatography to give 110 mg (94% yield) of the titled compound as a white solid. IR (Neat): 3061, 3028, 2961, 2873, 1767, 1447, 1192, 1178, 984, 755, 698  $\text{cm}^{-1}$ ;  $^1\text{H}$  NMR (500 MHz, Chloroform-*d*)  $\delta$  7.45 - 7.38 (m, 4H), 7.22 (tt,  $J = 7.0, 1.7$  Hz, 1H), 4.80 (dddd,  $J = 9.9, 8.2, 4.9, 3.3$  Hz, 1H), 4.70 (t,  $J = 8.6$  Hz, 1H), 4.23 (dd,  $J = 9.1, 4.8$  Hz, 1H), 3.68 (s, 3H), 2.88 (dd,  $J = 16.8, 3.4$  Hz, 1H), 2.57 (dd,  $J = 16.8, 10.0$  Hz, 1H).;  $^{13}\text{C}$  NMR (126 MHz,  $\text{CDCl}_3$ )  $\delta$  170.43, 155.37, 135.97, 129.45, 125.78, 122.05, 67.42, 53.07, 52.21, 36.80.; HRMS (ESI) exact mass calculated for  $[\text{M}+\text{H}]^+$  ( $\text{C}_{12}\text{H}_{13}\text{NO}_2$ ) required  $m/z$  235.08446, found  $m/z$  235.08436 difference 0.42 ppm.

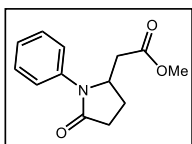

#### **6- methyl 2-(5-oxo-1-phenylpyrrolidin-2-yl)acetate**

Followed Method B using (E)-methyl 6-oxo-6-(phenylamino)hex-2-enoate (117 mg, 0.5 mmol) for 30 min and purified using silica gel chromatography to give 101 mg (87% yield) of the titled compound as a white solid. IR(Neat) 2953, 1731, 1691, 1596, 1497, 1457, 1436, 1386, 1290, 1193, 1171, 1116, 1073, 1055, 1007, 901, 828, 756, 693, 657  $\text{cm}^{-1}$ ;  $^1\text{H}$  NMR (500 MHz, Chloroform-*d*)  $\delta$  7.42 - 7.34 (m, 4H), 7.22 (tt,  $J = 7.2, 2.0$  Hz, 1H), 4.62 (tdd,  $J = 8.5, 6.2, 4.1$  Hz, 1H), 3.62 (s, 3H), 2.74 - 2.67 (m, 1H), 2.64 (dd,  $J = 9.5, 7.2$  Hz, 1H), 2.59 (dd,  $J = 9.7, 6.0$  Hz, 1H), 2.55 - 2.43 (m, 1H), 2.38 (dd,  $J = 15.7, 9.3$  Hz, 1H), 1.96 - 1.86 (m, 1H).;  $^{13}\text{C}$  NMR (126 MHz,  $\text{CDCl}_3$ )  $\delta$  174.02, 170.97, 136.94, 129.23, 126.30, 124.20, 56.56, 51.86, 38.38, 30.82, 24.47.; HRMS (ESI) exact mass calculated for  $[\text{M}+\text{H}]^+$  ( $\text{C}_{13}\text{H}_{16}\text{NO}_3$ ) required  $m/z$  233.10519, found  $m/z$  233.10493 difference 1.13 ppm.

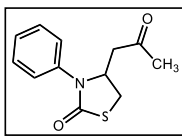

#### **7- 4-(2-oxopropyl)-3-phenylthiazolidin-2-one**

Followed Method B using (E)-S-(4-oxopent-2-en-1-yl) phenylcarbamothioate (118 mg, 0.5 mmol) for 30 min and purified using silica gel chromatography to give 81 mg (69% yield) of the titled compound as a white solid. IR(Neat) 3056, 1712, 1660, 1594, 1493, 1385, 1364, 1266, 1157, 1098, 836, 755, 751, 705, 694  $\text{cm}^{-1}$ ;  $^1\text{H}$  NMR (500 MHz, Chloroform-*d*)  $\delta$  7.34 (t,  $J = 7.9$  Hz, 2H), 7.24 (d,  $J = 7.5$  Hz, 2H), 7.23 - 7.18 (m, 1H), 4.73 (ddt,  $J = 10.2, 7.0, 3.4$  Hz, 1H), 3.73 (dd,  $J = 11.4, 7.3$  Hz, 1H), 2.97 - 2.94 (m, 1H), 2.94 - 2.89 (m, 1H), 2.67 (dd,  $J = 18.3, 2.8$  Hz, 1H), 2.04 (s, 3H).;  $^{13}\text{C}$  NMR (126 MHz,  $\text{CDCl}_3$ )  $\delta$  205.79, 170.86, 137.28, 129.51, 127.07, 125.47, 57.58, 44.95, 31.67, 30.56.; HRMS (ESI) exact mass calculated for  $[\text{M}+\text{H}]^+$  ( $\text{C}_{12}\text{H}_{14}\text{NO}_2\text{S}$ ) required  $m/z$  235.00670, found  $m/z$  235.00638 difference 1.36 ppm.

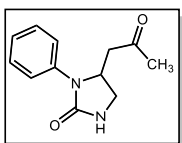

#### **8- 5-(2-oxopropyl)-1-phenylimidazolidin-2-one**

Followed Method B using (E)-1-(4-oxopent-2-en-1-yl)-3-phenylurea (109 mg, 0.5 mmol) for 30 min and purified using silica gel chromatography to give 105 mg (96% yield) of the titled compound as a white solid. IR(Neat) 3241, 3105, 1710, 1683, 1599, 1497, 1455, 1440, 1406, 1366, 1258, 1137, 801, 752, 688  $\text{cm}^{-1}$ ;  $^1\text{H}$  NMR (500 MHz, Chloroform-*d*)  $\delta$  7.40 (d,  $J = 7.6$  Hz, 2H), 7.36 (t,  $J = 7.9$  Hz,

2H), 7.13 (t,  $J = 7.2$  Hz, 1H), 4.82 - 4.75 (m, 1H), 4.73 (s, 1H), 3.87 (t,  $J = 8.8$  Hz, 1H), 3.15 (dd,  $J = 9.1, 4.7$  Hz, 1H), 2.96 (dd,  $J = 18.5, 2.8$  Hz, 1H), 2.75 (dd,  $J = 18.5, 10.1$  Hz, 1H), 2.12 (s, 3H).;  $^{13}\text{C}$  NMR (126 MHz,  $\text{CDCl}_3$ )  $\delta$  206.48, 137.73, 129.20, 124.35, 121.51, 109.99, 52.36, 46.02, 44.25, 30.57; HRMS (ESI) exact mass calculated for  $[\text{M}+\text{H}]^+$  ( $\text{C}_{12}\text{H}_{14}\text{N}_2\text{O}_2$ ) required  $m/z$  218.10553, found  $m/z$  218.10528 difference 1.14 ppm.

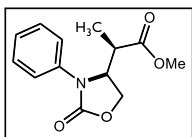

**9- methyl (R)-2-((S)-2-oxo-3-phenyloxazolidin-4-yl)propanoate**

Followed Method B using (E)-methyl 2-methyl-4-((phenylcarbamoyl)oxy)but-2-enoate (25 mg, 0.1 mmol) for 30 min and purified using silica gel preparative TLC to give 24.5 mg (98% yield) of the titled compound as a white solid. IR (Neat) 2984, 2952, 1749, 1732, 1598, 1502, 1409, 1298, 1209, 1140, 759, 695, 675  $\text{cm}^{-1}$ ;  $^1\text{H}$  NMR (500 MHz, Chloroform- $d$ )  $\delta$  7.46 - 7.37 (m, 4H), 7.21 (tt,  $J = 7.1, 1.5$  Hz, 1H), 4.68 (dt,  $J = 8.9, 3.7$  Hz, 1H), 4.54 (t,  $J = 8.9$  Hz, 1H), 4.36 (dd,  $J = 9.0, 3.8$  Hz, 1H), 2.82 (qd,  $J = 7.2, 3.6$  Hz, 1H), 1.15 (d,  $J = 7.2$  Hz, 3H).;  $^{13}\text{C}$  NMR (126 MHz,  $\text{CDCl}_3$ )  $\delta$  172.78, 155.66, 136.43, 129.23, 125.95, 123.04, 64.44, 58.79, 52.18, 40.39, 12.12.; HRMS (ESI) exact mass calculated for  $[\text{M}+\text{H}]^+$  ( $\text{C}_{13}\text{H}_{15}\text{NO}_4$ ) required  $m/z$  249.10011, found  $m/z$  249.10035 difference 0.98 ppm.

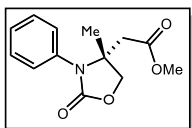

**10- methyl 2-(4-methyl-2-oxo-3-phenyloxazolidin-4-yl)acetate**

Followed Method B using (E)-methyl 3-methyl-4-((phenylcarbamoyl)oxy)but-2-enoate (125 mg, 0.50 mmol) for 30 min and purified using silica gel chromatography to give 110 mg (88% yield) of the titled product as a white solid. IR (Neat) 2963, 1743, 1722, 1596, 1500, 1435, 1394, 1382, 1367, 1328, 1277, 1233, 1208, 1155, 1126, 1061, 1004, 965, 699, 654  $\text{cm}^{-1}$ ;  $^1\text{H}$  NMR (500 MHz, Chloroform- $d$ )  $\delta$  7.37 (t,  $J = 7.4$  Hz, 2H), 7.32 (t,  $J = 7.4$  Hz, 1H), 7.18 (d,  $J = 7.3$  Hz, 2H), 4.56 (d,  $J = 9.1$  Hz, 1H), 4.23 (d,  $J = 9.1$  Hz, 1H), 3.63 (s, 3H), 2.68 (d,  $J = 15.5$  Hz, 1H), 2.48 (d,  $J = 15.5$  Hz, 1H), 1.38 (s, 3H).;  $^{13}\text{C}$  NMR (126 MHz,  $\text{CDCl}_3$ )  $\delta$  169.99, 156.84, 134.34, 129.54, 129.40, 128.60, 73.42, 61.02, 52.10, 42.71.; HRMS (ESI) exact mass calculated for  $[\text{M}+\text{Na}]^+$  ( $\text{C}_{13}\text{H}_{15}\text{NO}_4\text{Na}$ ) requires  $m/z$  249.10011, found  $m/z$  249.10012 difference 0.04 ppm.

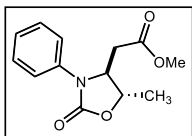

**11- methyl 2-(5-methyl-2-oxo-3-phenyloxazolidin-4-yl)acetate**

Followed Method B using (E)-methyl 4-((phenylcarbamoyl)oxy)pent-2-enoate (125 mg, 0.5 mmol) for 30 min and purified using silica gel chromatography to give 115 mg (92% yield) of the titled compound as a white solid. IR (Neat) 2984, 2952, 1749, 1732, 1598, 1502, 1409, 1298, 1209, 1140, 759, 695, 675  $\text{cm}^{-1}$ ;  $^1\text{H}$  NMR (500 MHz, Chloroform- $d$ )  $\delta$  7.41 - 7.36 (m, 2H), 7.35 - 7.30 (m, 2H), 7.13 (tt,  $J = 7.2, 1.3$  Hz, 1H), 4.42 (qd,  $J = 6.3, 3.7$  Hz, 1H), 4.30 (dt,  $J = 9.8, 3.7$  Hz, 1H), 2.75 (dd,  $J = 16.6, 3.4$  Hz, 1H), 2.49 (dd,  $J = 16.6, 9.8$  Hz, 1H), 1.50 (d,  $J = 6.3$  Hz, 3H).;  $^{13}\text{C}$  NMR (126 MHz,  $\text{CDCl}_3$ )  $\delta$  170.48, 154.61, 136.23, 129.39, 125.55, 121.84, 75.64, 59.57, 52.10, 36.61, 20.90.; HRMS (ESI) exact mass calculated for  $[\text{M}+\text{H}]^+$  ( $\text{C}_{13}\text{H}_{16}\text{NO}_4$ ) required  $m/z$  249.10011, found  $m/z$  249.10029 difference 0.75 ppm.

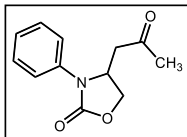

**12- 4-(2-oxopropyl)-3-phenyloxazolidin-2-one**

Followed Method B using (E)-4-oxopent-2-en-1-yl phenylcarbamate (110 mg, 0.5 mmol) for 30 min and purified using silica gel chromatography to give 104 mg (95% yield) of the titled compound as a white solid.

IR(Neat) 3060, 2919., 1746, 1708, 1598, 1499, 1399, 1365, 1215, 1165, 1091, 1037, 757, 732, 693, 673  $\text{cm}^{-1}$ ;  $^1\text{H}$  NMR (300 MHz, Chloroform-*d*)  $\delta$  7.36 - 7.31 (m, 4H), 7.18 - 7.10 (m, 1H), 4.81 - 4.71 (m, 1H), 4.66 (ddd,  $J = 9.1, 8.3, 0.9$  Hz, 1H), 3.98 (dd,  $J = 8.8, 4.8$  Hz, 1H), 2.99 (dd,  $J = 18.5, 2.8$  Hz, 1H), 2.64 (dd,  $J = 18.5, 10.0$  Hz, 1H), 2.07 (s, 3H).;  $^{13}\text{C}$  NMR (126 MHz,  $\text{CDCl}_3$ )  $\delta$  205.78, 155.42, 136.22, 129.44, 125.59, 121.84, 67.91, 52.32, 46.09, 30.35.; HRMS (ESI) exact mass calculated for  $[\text{M}+\text{Na}]^+$  ( $\text{C}_{12}\text{H}_{13}\text{NNaO}_3$ ) required  $m/z$  219.08954, found  $m/z$  219.08986 difference 1.45 ppm.

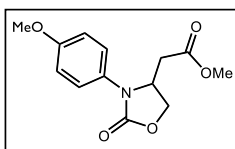

**13- methyl 2-(3-(4-methoxyphenyl)-2-oxooxazolidin-4-yl)acetate**

Followed Method B using (E)-methyl 4-(((4-methoxyphenyl)carbamoyl)oxy)but-2-enoate (133 mg, 0.5 mmol) for 30 min and purified using silica gel chromatography to give 127 mg (96% yield) of the titled compound as a white solid.

IR(Neat) 3012, 2955, 2839, 1733, 1512, 1438, 1407, 1367, 1327, 1297, 1246, 1200, 1171, 1126, 1030, 969, 831, 748  $\text{cm}^{-1}$ ;  $^1\text{H}$  NMR (500 MHz, Chloroform-*d*)  $\delta$  7.29 (d,  $J = 8.9$  Hz, 1H), 6.92 (d,  $J = 8.9$  Hz, 1H), 4.72 - 4.63 (m, 2H), 4.23 - 4.17 (m, 1H), 3.80 (s, 3H), 3.66 (s, 3H), 2.80 (dd,  $J = 16.6, 3.5$  Hz, 1H), 2.58 - 2.50 (m, 1H).;  $^{13}\text{C}$  NMR (126 MHz,  $\text{CDCl}_3$ )  $\delta$  170.37, 157.90, 155.94, 128.63, 125.00, 114.70, 67.48, 55.53, 53.92, 52.13, 37.08.; HRMS (ESI) exact mass calculated for  $[\text{M}+\text{H}]^+$  ( $\text{C}_{13}\text{H}_{15}\text{NO}_5$ ) required  $m/z$  265.09502, found  $m/z$  265.09470 difference 1.22 ppm.

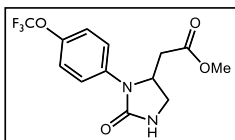

**14- methyl 2-(2-oxo-3-(4-(trifluoromethoxy)phenyl)imidazolidin-4-yl)acetate**

Followed Method B using (E)-methyl 4-(3-(4-(trifluoromethoxy)phenyl)ureido)but-2-enoate (159 mg, 0.5 mmol) for 30 min and purified using silica gel chromatography to give 155 mg (97% yield) of the titled compound as a white solid.

IR(Neat) 3226, 3115, 1731, 1703, 1508, 1431, 1276, 1256, 1207, 1142, 1007, 985, 943, 922, 900, 848, 810, 753  $\text{cm}^{-1}$ ;  $^1\text{H}$  NMR (500 MHz, Chloroform-*d*)  $\delta$  7.47 (d,  $J = 9.0$  Hz, 2H), 7.22 (d,  $J = 9.0$  Hz, 2H), 5.02 (s, 1H), 4.72 (dddd,  $J = 9.7, 8.2, 4.4, 3.4$  Hz, 1H), 3.85 (t,  $J = 8.9$  Hz, 1H), 3.32 (dd,  $J = 9.1, 4.5$  Hz, 1H), 2.79 (dd,  $J = 16.3, 3.4$  Hz, 1H), 2.58 (dd,  $J = 16.3, 9.8$  Hz, 1H).;  $^{13}\text{C}$  NMR (126 MHz,  $\text{CDCl}_3$ )  $\delta$  170.81, 159.06, 145.42, 136.31, 122.59, 121.91, 120.47 (d,  $J = 257$  Hz), 53.24, 52.04, 43.77, 36.84.; HRMS (ESI) exact mass calculated for  $[\text{M}+\text{H}]^+$  ( $\text{C}_{13}\text{H}_{14}\text{F}_3\text{N}_2\text{O}_4$ ) required  $m/z$  318.08274, found  $m/z$  318.08240 difference 1.09 ppm.

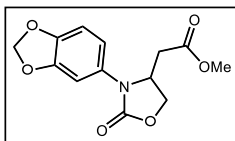

**15- methyl 2-(3-(benzo[d][1,3]dioxol-5-yl)-2-oxooxazolidin-4-yl)acetate**

Followed Method B using (E)-methyl 4-((benzo[d][1,3]dioxol-5-yl)carbamoyl)oxy)but-2-enoate (140 mg, 0.5 mmol) for 30 min and purified using silica gel chromatography to give 132 mg (95% yield)

of the titled compound as a white solid. IR(Neat) 2956, 1731, 1632, 1504, 1488, 1408, 1218, 1174, 1093, 1032, 930, 808, 719  $\text{cm}^{-1}$ ;  $^1\text{H}$  NMR (500 MHz, Chloroform-*d*)  $\delta$  6.96 (d,  $J = 2.2$  Hz, 1H), 6.81 (d,  $J = 8.3$  Hz, 1H), 6.75 (dd,  $J = 8.3, 2.2$  Hz, 1H), 5.98 (s, 2H), 4.69 (t,  $J = 8.5$  Hz, 1H), 4.63 (dddd,  $J = 9.6, 8.4, 4.9, 3.4$  Hz, 1H), 4.19 (dd,  $J = 8.7, 4.9$  Hz, 1H), 3.67 (s, 3H), 2.82 (dd,  $J = 16.7, 3.4$  Hz, 1H), 2.54 (dd,  $J = 16.7, 9.5$  Hz, 1H).;  $^{13}\text{C}$  NMR (126 MHz,  $\text{CDCl}_3$ )  $\delta$  170.31, 155.80, 148.37, 146.05, 129.80, 116.83, 108.43, 105.55, 101.68, 67.46, 54.06, 52.16, 36.96.; HRMS (ESI) exact mass calculated for  $[\text{M}+\text{H}]^+$  ( $\text{C}_{13}\text{H}_{14}\text{NO}_6$ ) required  $m/z$  279.07429, found  $m/z$  279.07467 difference 1.36 ppm.

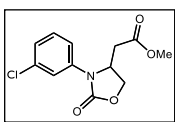

**16- methyl 2-(3-(3-chlorophenyl)-2-oxooxazolidin-4-yl)acetate**

Followed Method B using (E)-methyl 4-(((3-chlorophenyl)carbamoyl)oxy)but-2-enoate (135 mg, 0.50 mmol) for 30 min and purified using silica gel chromatography to give 133 mg (99% yield) of the titled compound as a white solid. IR(Neat) 2955, 1730, 1594, 1576, 1484, 1437, 1400, 1369, 1196, 1174, 1127, 1095, 982, 874, 779, 751, 682  $\text{cm}^{-1}$ ;  $^1\text{H}$  NMR (500 MHz, Chloroform-*d*)  $\delta$  7.51 (s, 1H), 7.35 - 7.29 (m, 2H), 7.21 - 7.16 (m, 1H), 4.83 - 4.74 (m, 1H), 4.69 (ddd,  $J = 9.1, 8.2, 0.7$  Hz, 1H), 4.24 (dd,  $J = 9.1, 4.5$  Hz, 1H), 3.70 (s, 3H), 2.87 (dd,  $J = 16.8, 3.3$  Hz, 1H), 2.58 (dd,  $J = 16.8, 9.9$  Hz, 1H).;  $^{13}\text{C}$  NMR (126 MHz,  $\text{CDCl}_3$ )  $\delta$  170.19, 154.89, 137.34, 135.16, 130.38, 125.64, 121.66, 119.43, 67.36, 52.84, 52.27, 36.56.; HRMS (ESI) exact mass calculated for  $[\text{M}+\text{Na}]^+$  ( $\text{C}_{12}\text{H}_{12}\text{ClNO}_4\text{Na}$ ) requires  $m/z$  269.04549, found  $m/z$  269.04521 difference 1.01 ppm.

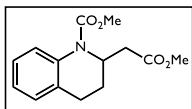

**17- methyl 2-(2-methoxy-2-oxoethyl)-3,4-dihydroquinoline-1(2H)-carboxylate**

Followed Method B using ((E)-methyl 5-(2-((methoxycarbonyl)amino)phenyl)pent-2-enoate (132 mg, 0.5 mmol) for 30 min and purified using silica gel chromatography to give 113 mg (86% yield) of the titled compound as a white solid. IR(Neat) 3327, 3006, 2957, 1729, 1704, 1529, 1456, 1430, 1293, 1213, 1192, 1160, 1061, 1047, 753, 724, 714  $\text{cm}^{-1}$ ;  $^1\text{H}$  NMR (500 MHz, Chloroform-*d*)  $\delta$  7.48 (d,  $J = 7.8$  Hz, 1H), 7.18 (t,  $J = 7.7$  Hz, 1H), 7.10 (d,  $J = 7.2$  Hz, 1H), 7.05 (t,  $J = 7.3$  Hz, 1H), 4.92 (p,  $J = 6.5$  Hz, 1H), 3.77 (s, 3H), 3.64 (s, 3H), 2.71 - 2.62 (m, 3H), 2.41 (dd,  $J = 14.9, 8.0$  Hz, 1H), 2.33 (dq,  $J = 13.1, 6.6$  Hz, 1H), 1.67 (dq,  $J = 13.5, 6.7$  Hz, 1H).;  $^{13}\text{C}$  NMR (126 MHz,  $\text{CDCl}_3$ )  $\delta$  171.48, 155.13, 136.26, 131.54, 127.83, 126.23, 125.56, 124.49, 53.01, 51.70, 50.47, 38.30, 28.98, 24.85.; HRMS (ESI) exact mass calculated for  $[\text{M}+\text{H}]^+$  ( $\text{C}_{14}\text{H}_{18}\text{NO}_4$ ) required  $m/z$  264.11576, found  $m/z$  264.11540 difference 1.37 ppm.

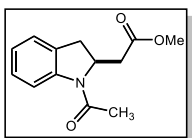

**18- methyl 2-(1-acetylidolin-2-yl)acetate**

Followed Method B using (E)-methyl 4-(2-acetamidophenyl)but-2-enoate (117 mg, 0.50 mmol) for 30 min and purified using silica gel chromatography to give 114 mg (98% yield) of the titled compound as a white solid. IR (Neat) 2984, 2952, 1749, 1732, 1598, 1502, 1409, 1298, 1209, 1140, 759, 695, 675  $\text{cm}^{-1}$ ; IR (Neat) 2984, 2952, 1749, 1732, 1598, 1502, 1409, 1298, 1209, 1140, 759, 695, 675  $\text{cm}^{-1}$ ;  $^1\text{H}$  NMR (400 MHz,  $\text{DMSO}-d_6$ , 80°C)  $\delta$  7.70 (s, 1H), 7.22 (d,  $J = 7.4$  Hz, 1H), 7.14 (t,  $J = 7.8$  Hz, 1H), 6.98 (t,  $J = 7.4$  Hz, 1H), 4.83 (tdd,  $J = 9.0, 4.1, 1.7$  Hz, 1H), 3.56 (s, 3H), 3.37 (dd,  $J = 16.2, 8.9$  Hz, 1H), 2.79 (d,  $J = 16.3$  Hz, 1H), 2.70 (dd,  $J = 15.2, 4.0$  Hz, 1H), 2.48 (dd,  $J = 15.1, 9.2$  Hz, 1H), 2.24 (s, 3H).;  $^{13}\text{C}$  NMR (100 MHz,



DMSO-d<sub>6</sub>, 80°C)  $\delta$  171.13, 168.41, 142.27, 131.42, 127.68, 125.84, 124.02, 116.92, 57.27, 51.96, 39.63, 34.63, 23.92.; HRMS (ESI) exact mass calculated for [M+H]<sup>+</sup> (C<sub>13</sub>H<sub>16</sub>NO<sub>3</sub>) requires  $m/z$  233.10519, found  $m/z$  233.10548 difference 1.24 ppm.

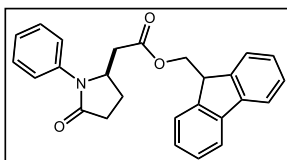

**19- (9H-fluoren-9-yl)methyl (R)-2-(5-oxo-1-phenylpyrrolidin-2-yl)acetate**

Followed Method B using (E)-(9H-fluoren-9-yl)methyl 6-oxo-6-(phenylamino)hex-2-enoate (199 mg, 0.5 mmol) for 30 min and purified using silica gel chromatography to give 184 mg (93% yield) of the titled compound as a white solid. IR (Neat) 2984, 2952, 1749, 1732, 1598, 1502, 1409, 1298, 1209, 1140, 759, 695, 675 cm<sup>-1</sup>; <sup>1</sup>H NMR (500 MHz, Chloroform-*d*)  $\delta$  7.78 (d,  $J$  = 7.5 Hz, 2H), 7.54 - 7.51 (m, 2H), 7.42 (td,  $J$  = 7.5, 3.4 Hz, 2H), 7.39 - 7.29 (m, 6H), 7.20 (t,  $J$  = 7.2 Hz, 1H), 4.45 (d,  $J$  = 6.3 Hz, 2H), 4.41 (tt,  $J$  = 8.2, 4.6 Hz, 1H), 4.15 (t,  $J$  = 6.3 Hz, 1H), 2.68 (dd,  $J$  = 15.5, 3.7 Hz, 1H), 2.59 (ddd,  $J$  = 17.1, 9.5, 7.3 Hz, 1H), 2.51 (dd,  $J$  = 9.7, 6.1 Hz, 1H), 2.33 (dd,  $J$  = 15.6, 9.7 Hz, 1H), 2.28 - 2.20 (m, 1H), 1.76 - 1.67 (m, 1H).; <sup>13</sup>C NMR (126 MHz, CDCl<sub>3</sub>)  $\delta$  173.96, 170.35, 143.49, 141.40, 136.88, 129.23, 127.93, 127.17, 126.16, 124.80, 123.87, 120.11, 66.06, 56.41, 46.83, 38.54, 30.82, 24.25.; HRMS (ESI) exact mass calculated for [M+Na]<sup>+</sup> (C<sub>26</sub>H<sub>23</sub>NNaO<sub>3</sub>) required  $m/z$  420.15701, found  $m/z$  420.15743 difference 1.05 ppm.

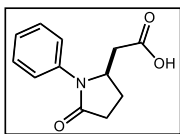

**2-(5-oxo-1-phenylpyrrolidin-2-yl)acetic acid**

(E)-(9H-fluoren-9-yl)methyl 6-oxo-6-(phenylamino)hex-2-enoate (199 mg, 0.5 mmol) and potassium *tert*-butoxide (84 mg, 0.75 mmol, 1.5 equiv.) and THF (10 mL) was added to 50 mL rbf and stirred at room temperature for 30 min. Rx was quenched with H<sub>2</sub>O, extracted with EtOAc, dried over Na<sub>2</sub>SO<sub>4</sub> and concentrated. Crude material was purified using silica gel chromatography to give 100 mg (91% yield) of the titled compound as a white solid. IR (Neat) 2994, 1656, 1596, 1546, 1498, 1409, 1296, 1190, 758, 695 cm<sup>-1</sup>; <sup>1</sup>H NMR (500 MHz, Chloroform-*d*)  $\delta$  7.42 - 7.34 (m, 4H), 7.26 - 7.21 (m, 1H), 4.60 (ddt,  $J$  = 11.2, 9.6, 3.8 Hz, 1H), 2.74 (dd,  $J$  = 16.1, 3.5 Hz, 1H), 2.72 - 2.65 (m, 1H), 2.63 - 2.56 (m, 1H), 2.56 - 2.47 (m, 1H), 2.41 (dd,  $J$  = 16.2, 9.5 Hz, 1H), 1.99 - 1.91 (m, 1H).; <sup>13</sup>C NMR (126 MHz, CDCl<sub>3</sub>)  $\delta$  174.84, 174.36, 136.69, 129.33, 126.53, 124.28, 56.45, 37.97, 30.79, 24.36.; HRMS (ESI) exact mass calculated for [M+H]<sup>+</sup> (C<sub>12</sub>H<sub>14</sub>NO<sub>3</sub>) required  $m/z$  219.08954, found  $m/z$  219.08945 difference 0.43 ppm.

#### IV. $^1\text{H}$ and $^{13}\text{C}$ NMR Spectra of Products

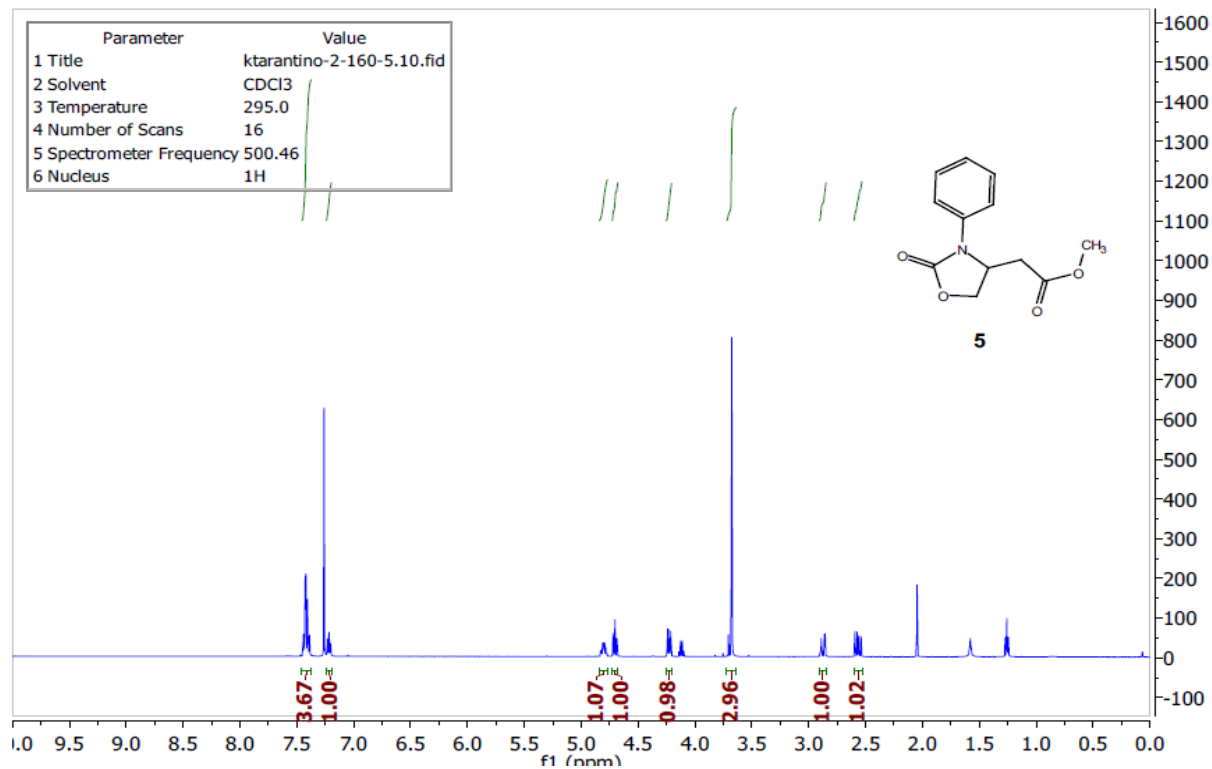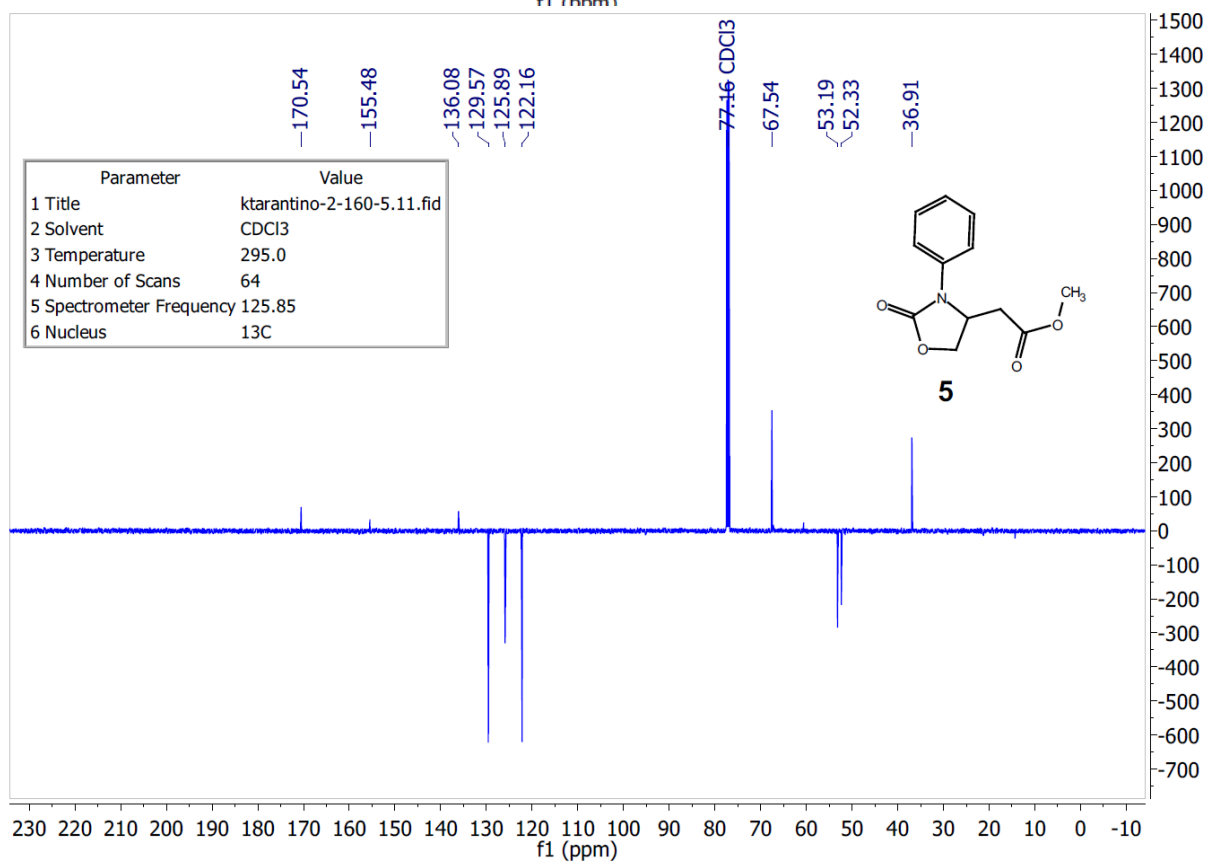

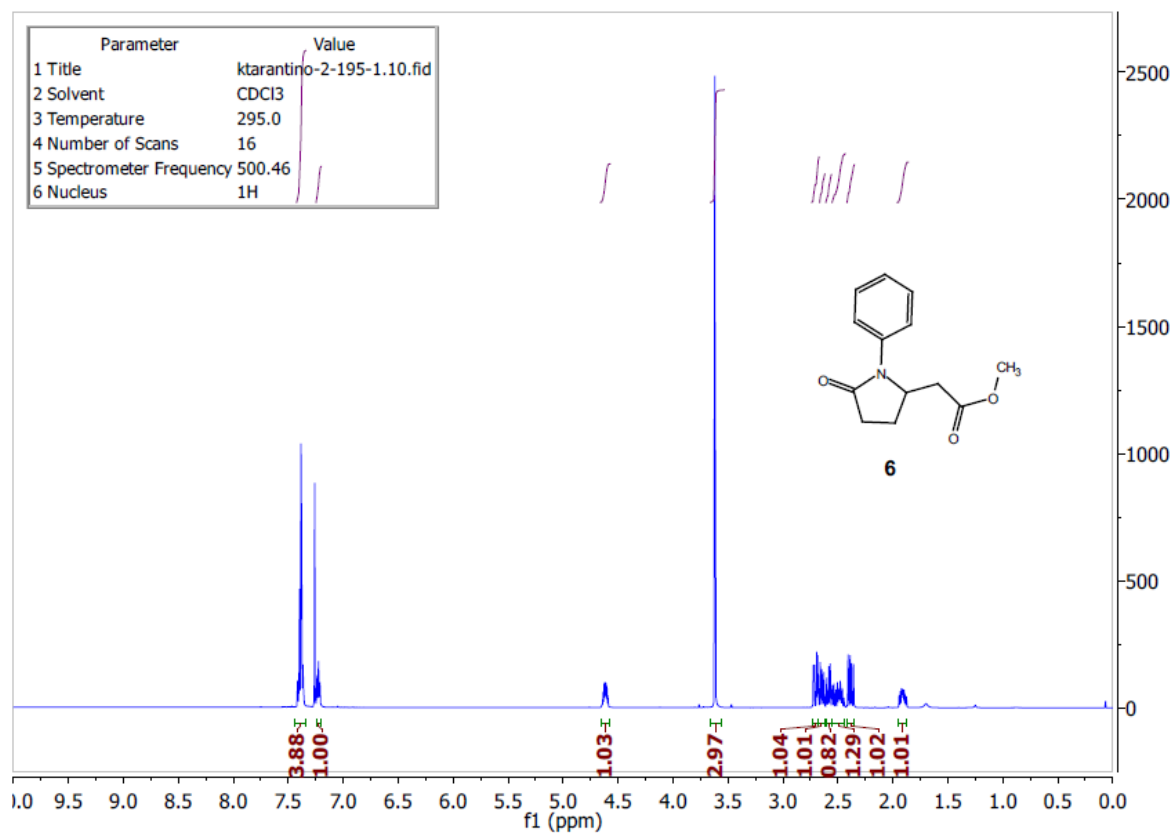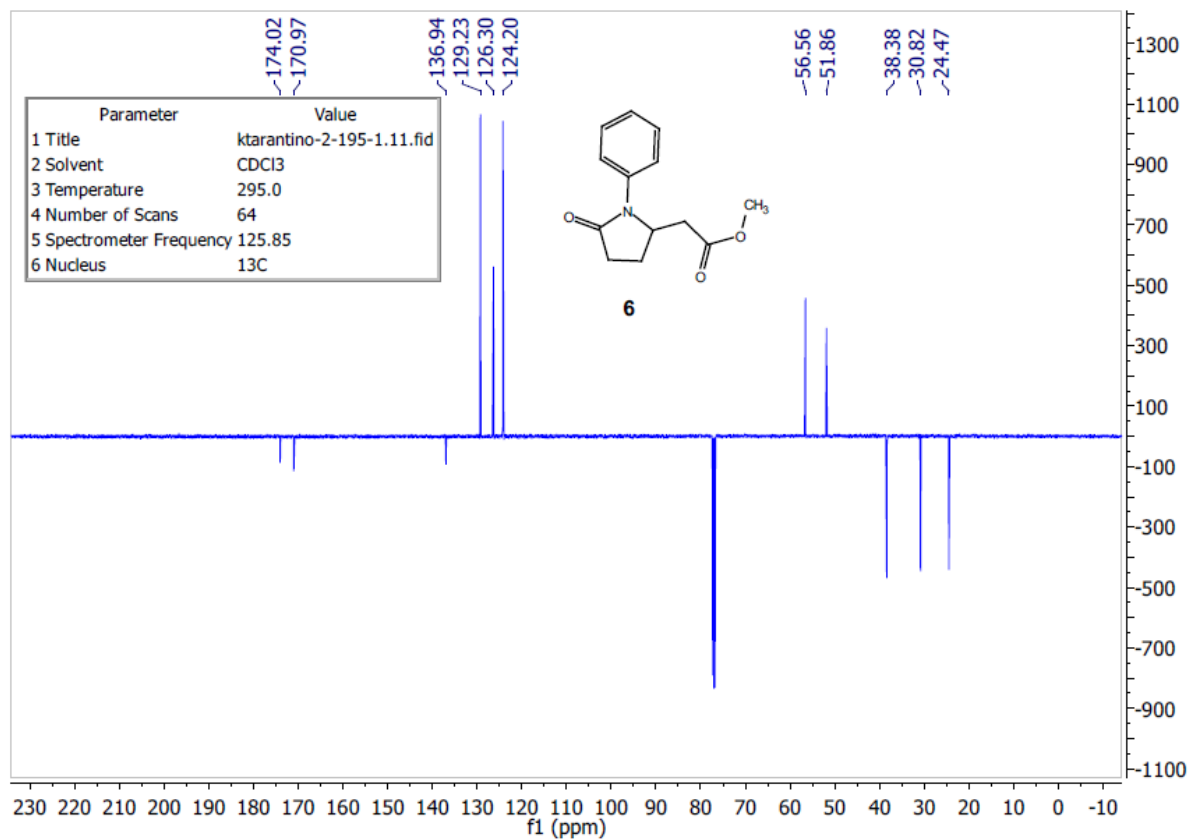

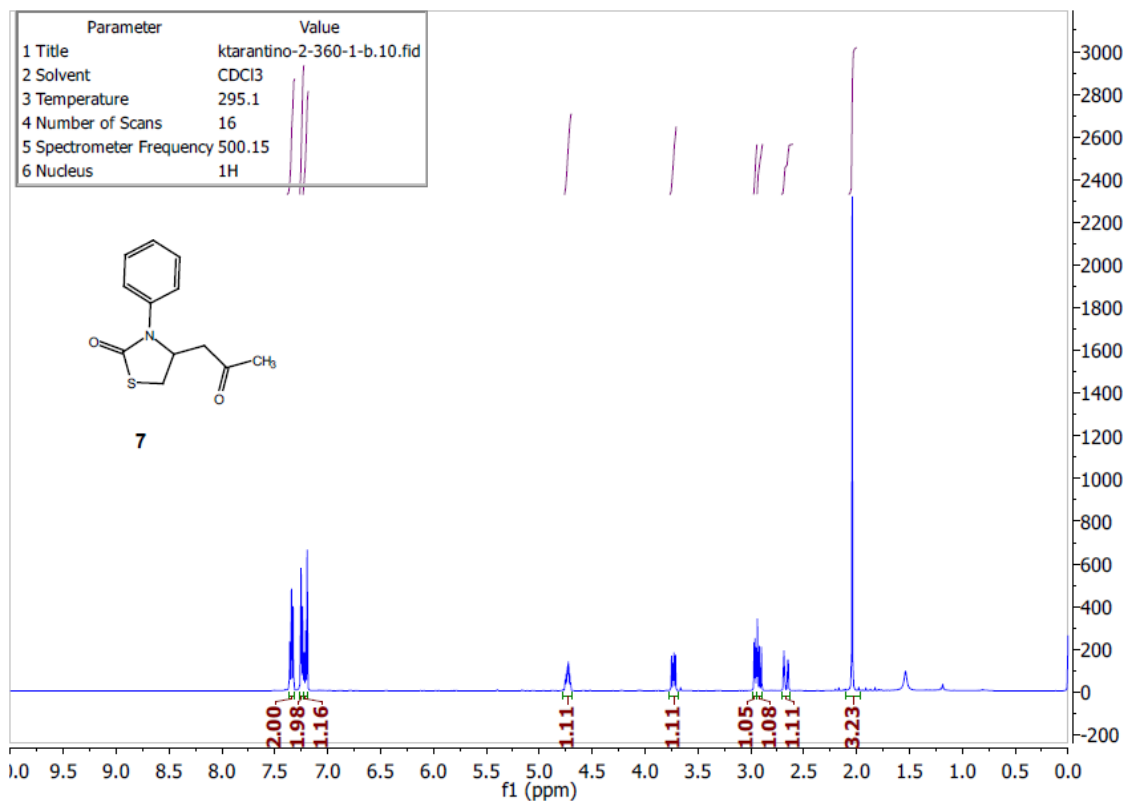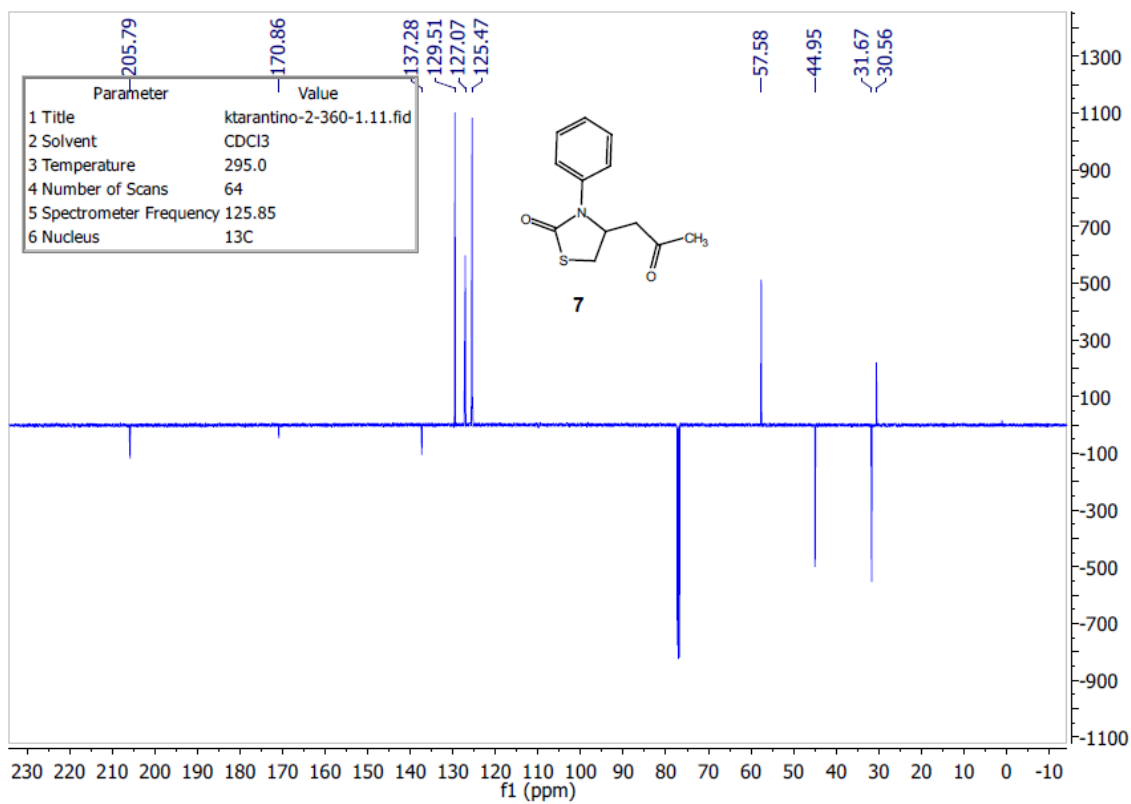

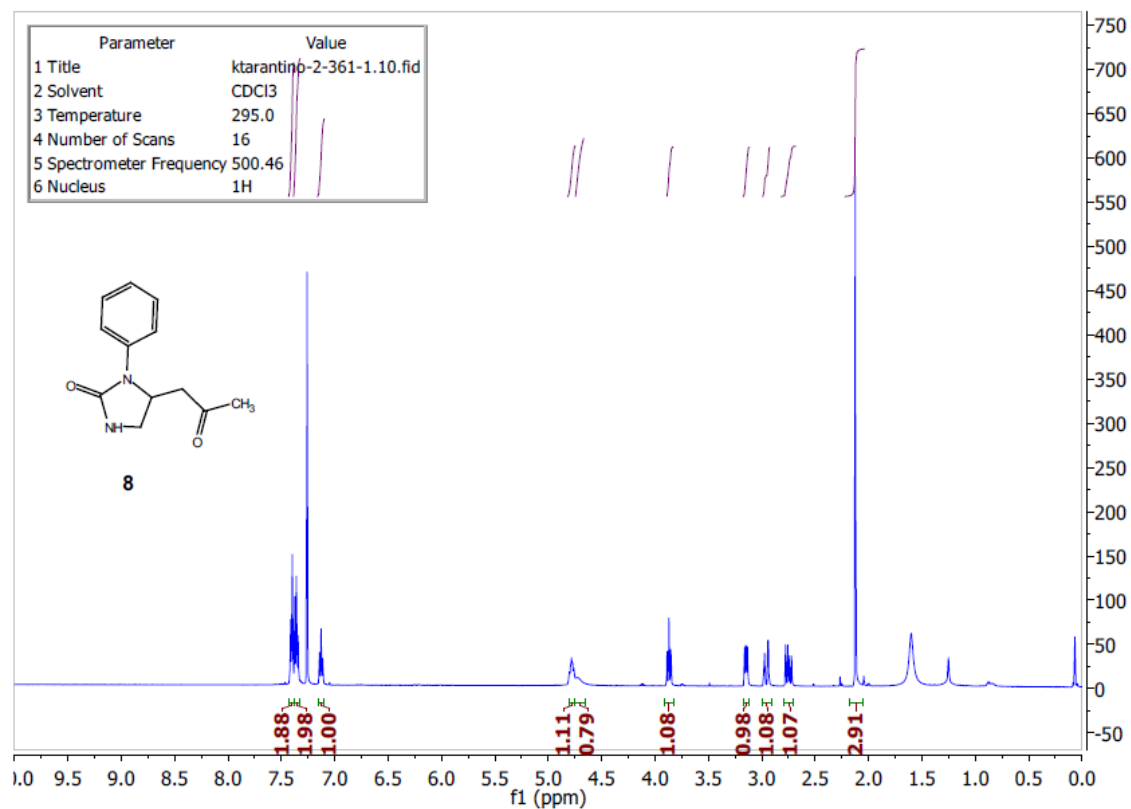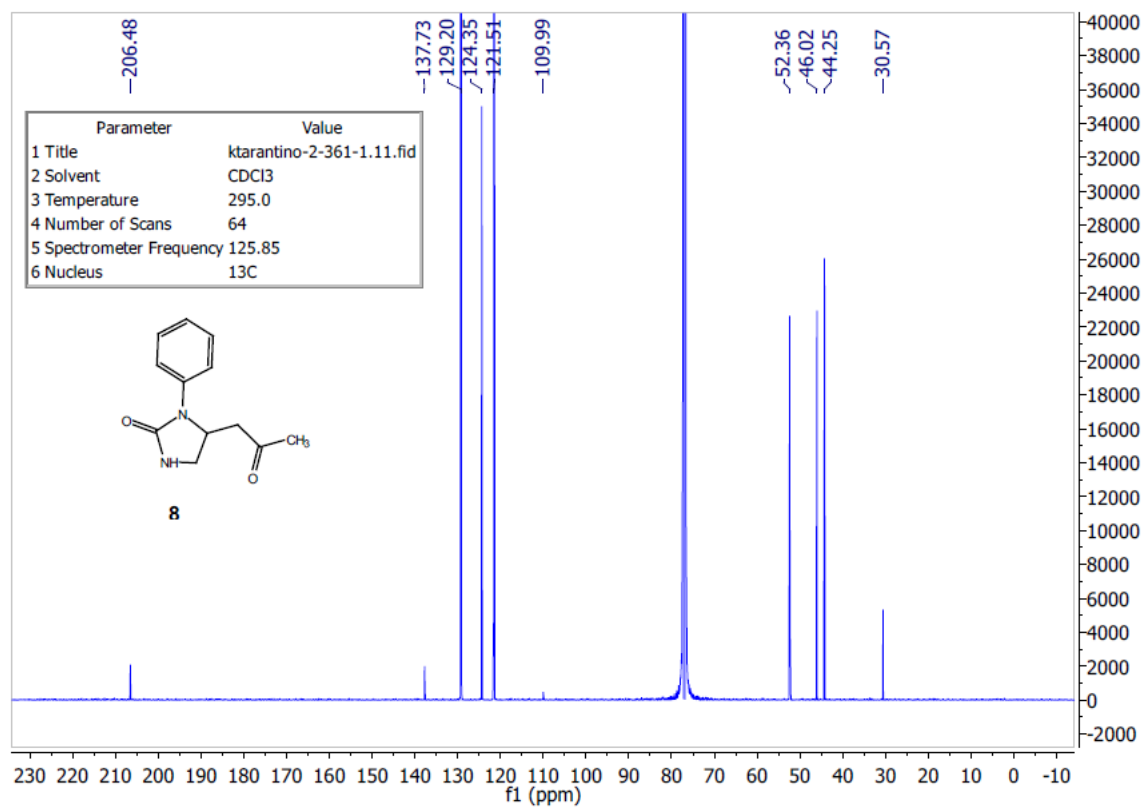

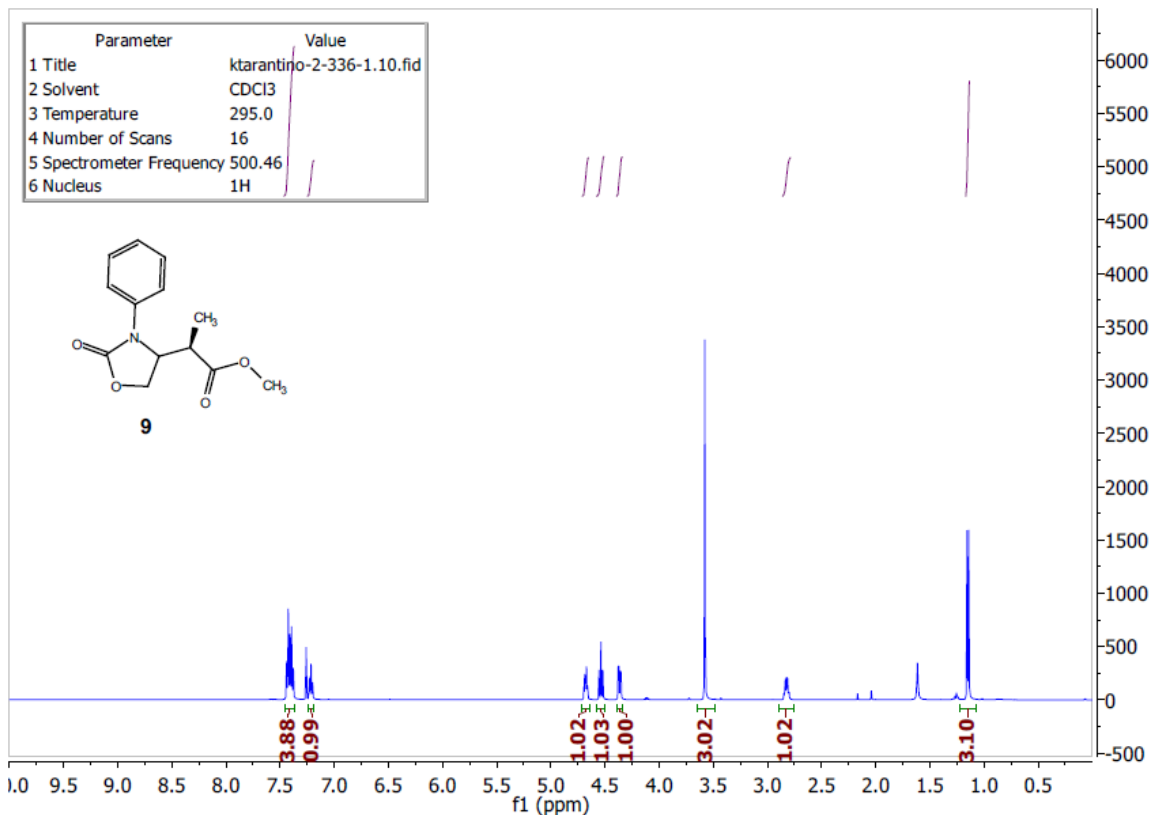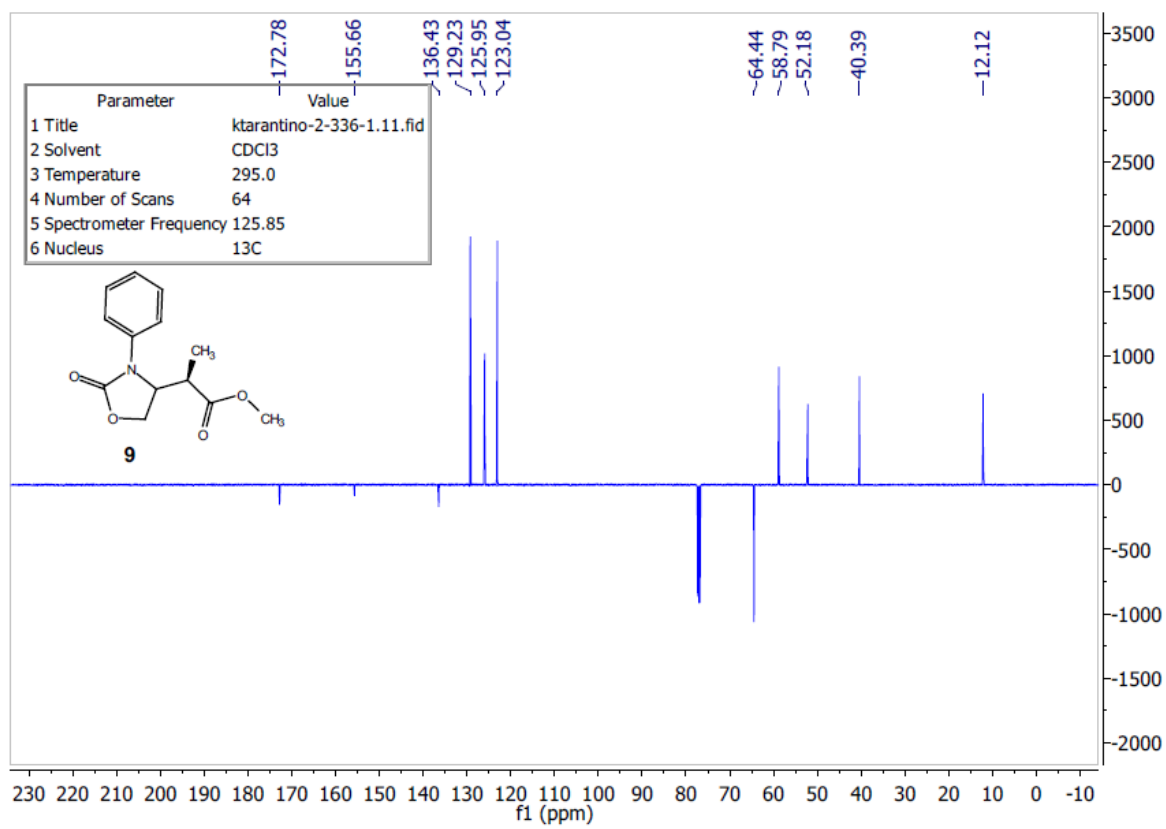

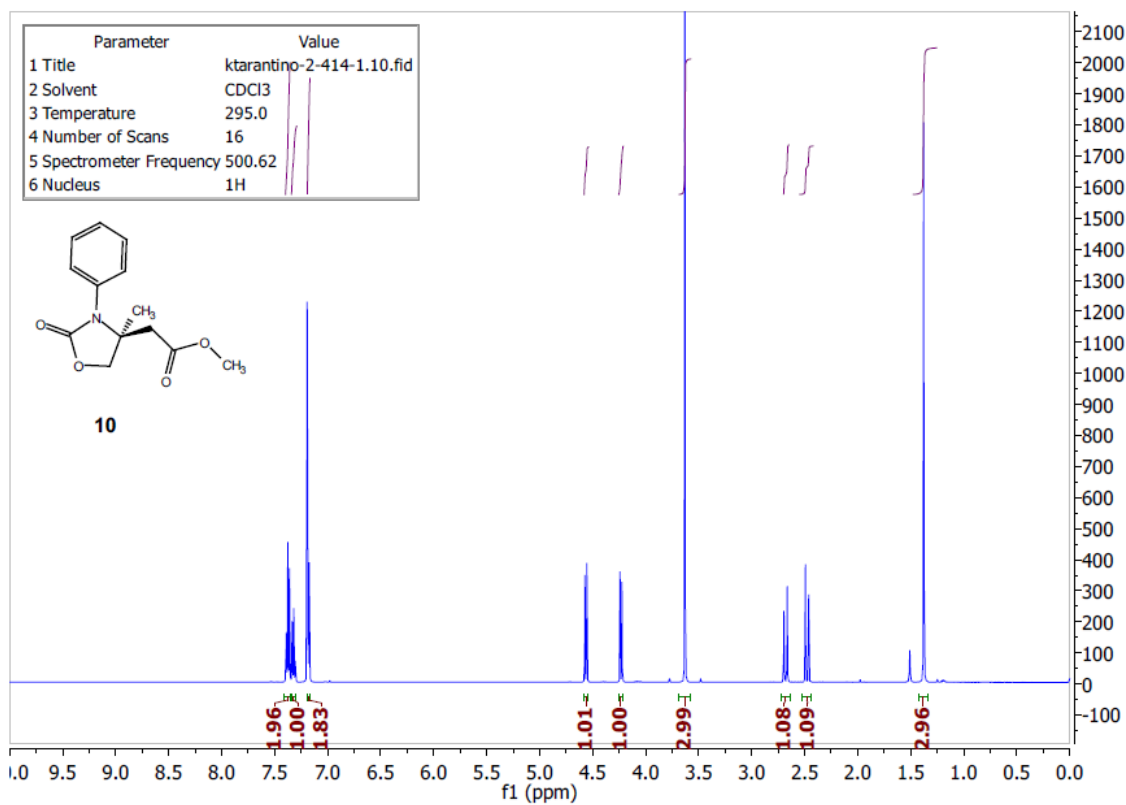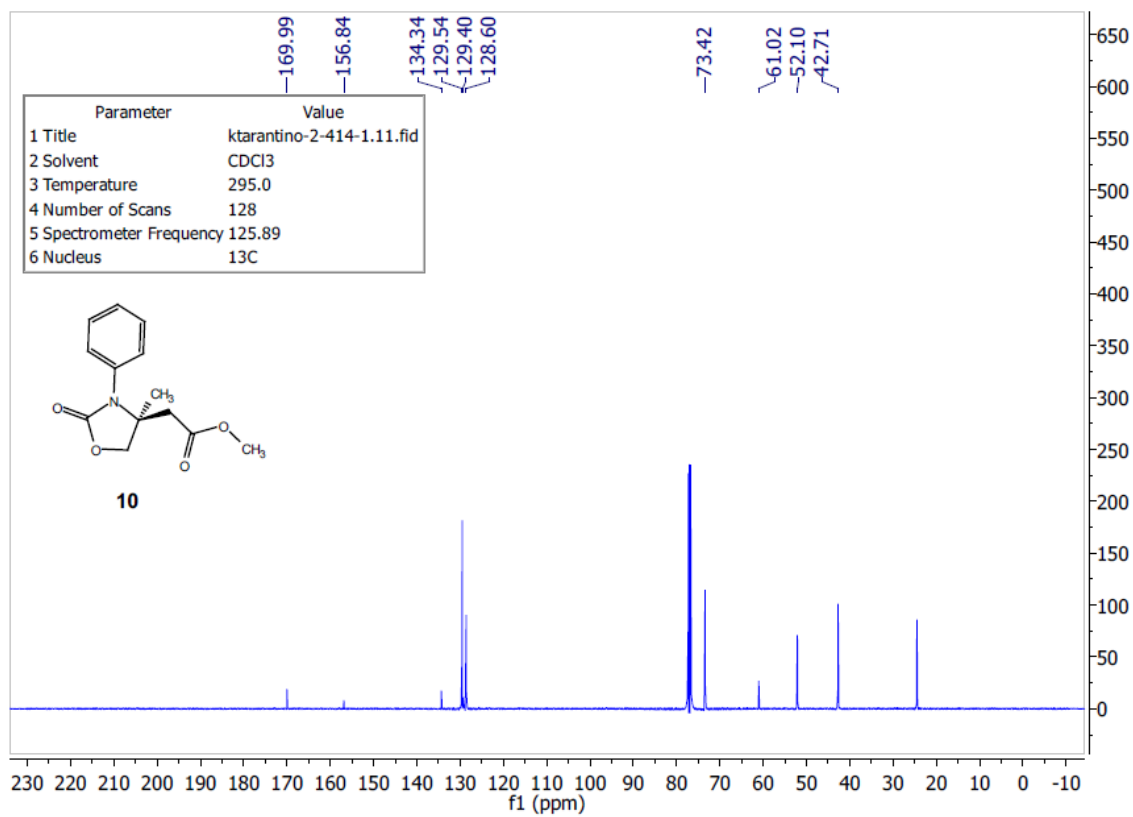

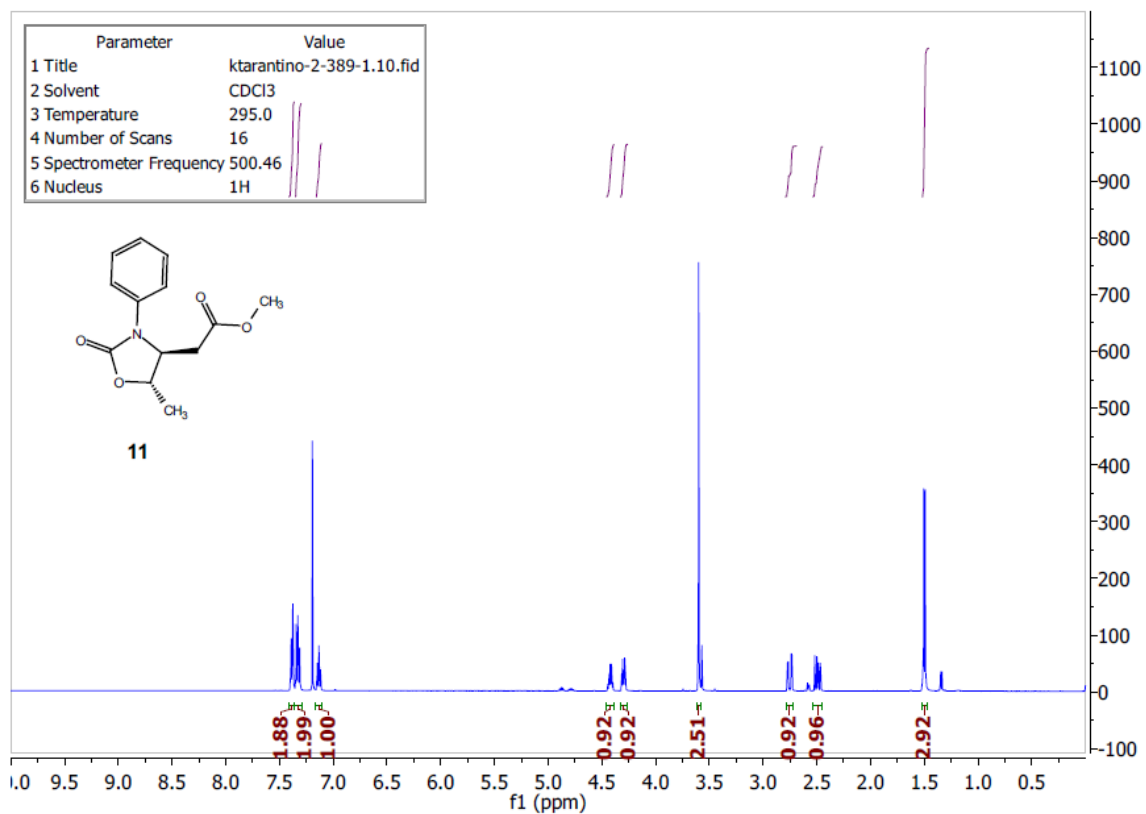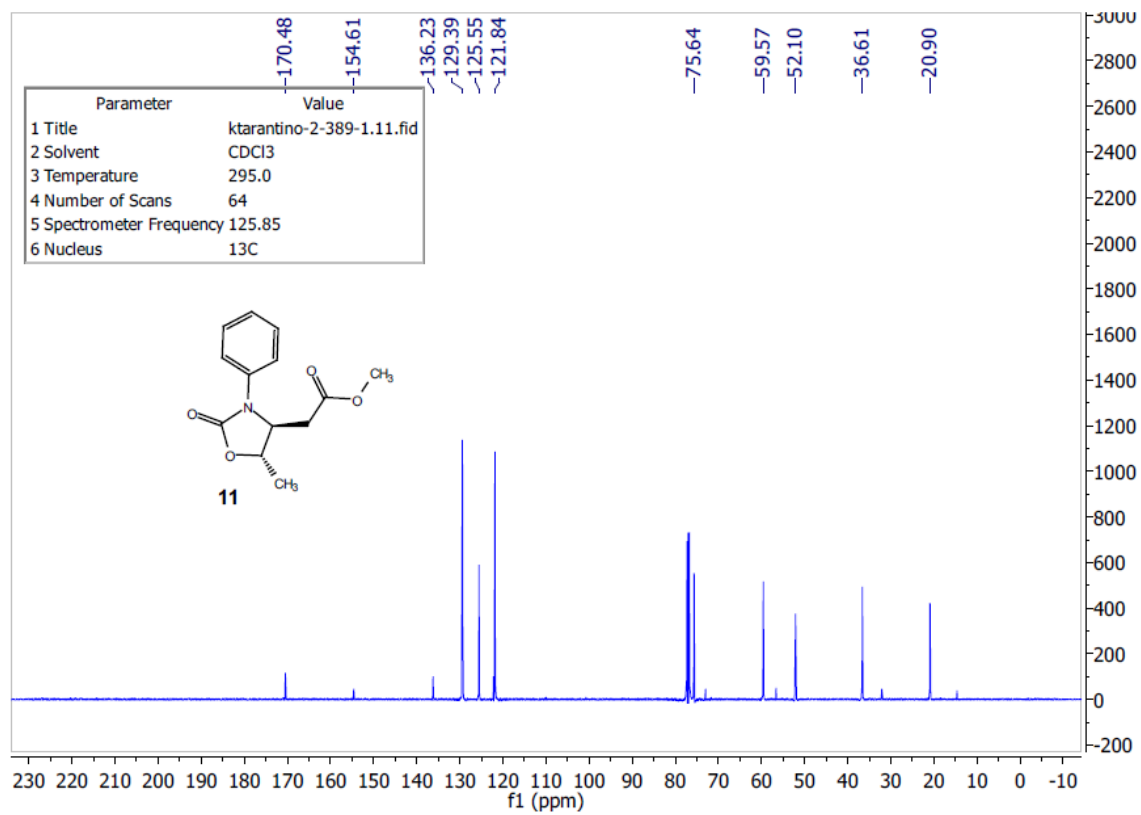



| Parameter                                 | Value (f2, f1)  |
|-------------------------------------------|-----------------|
| 1 Title                                   | kt-2-gMe.11.ser |
| 2 Solvent                                 | CDCl3           |
| 3 Temperature                             | 295.0           |
| 4 Number of Scans                         | 2               |
| 5 Spectrometer Frequency (500.15, 500.15) |                 |
| 6 Spectral Width (7002.8, 7002.8)         |                 |
| 7 Lowest Frequency (-1169.2, -1174.7)     |                 |
| 8 Nucleus (1H, 1H)                        |                 |
| 9 Acquired Size (1024, 256)               |                 |
| 10 Spectral Size (1024, 1024)             |                 |

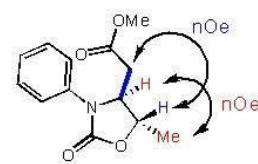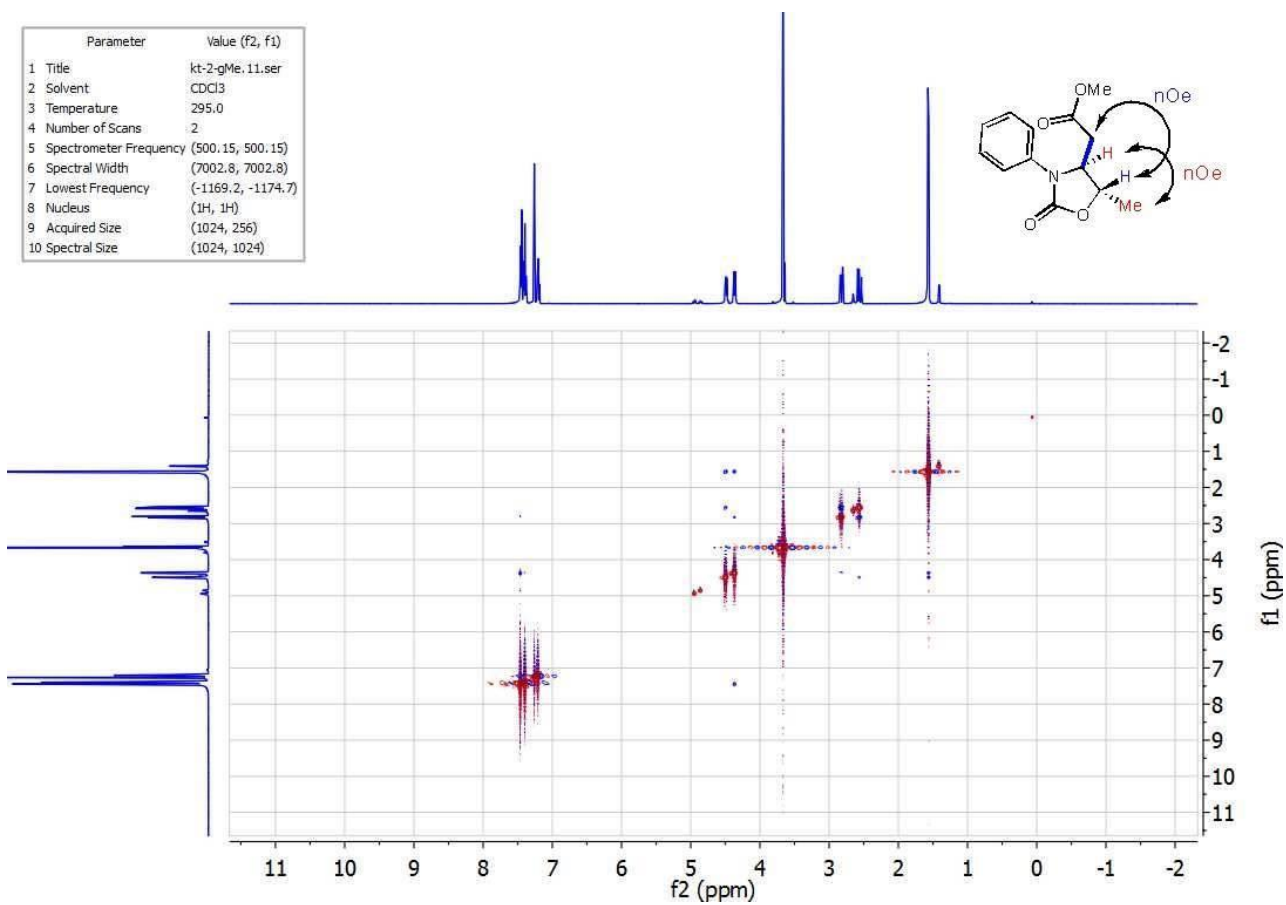

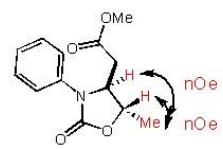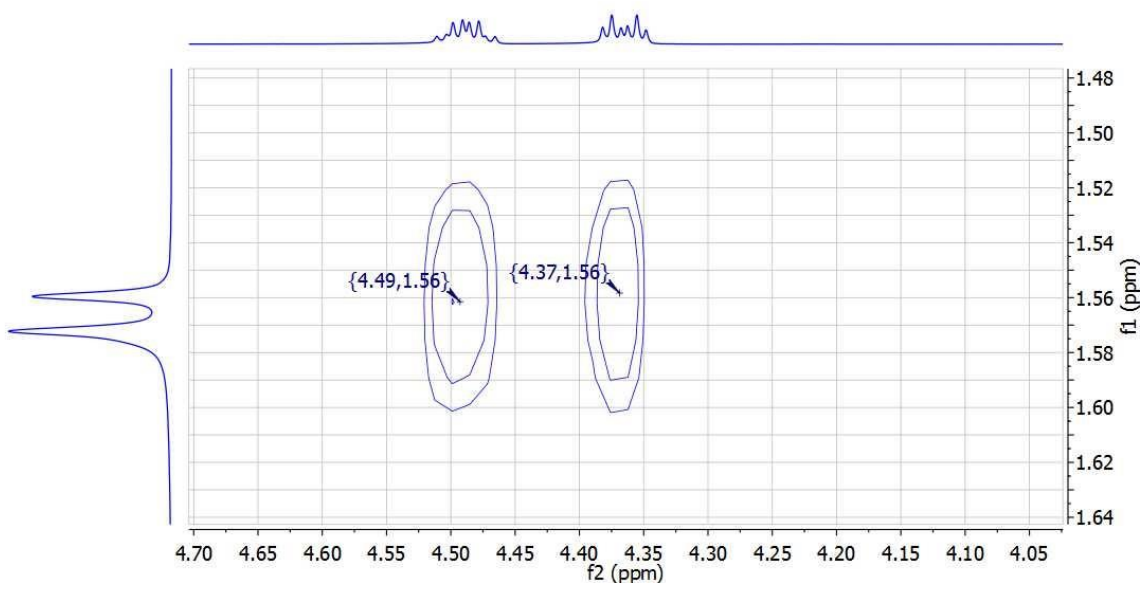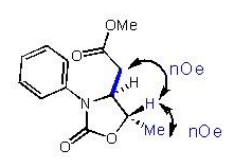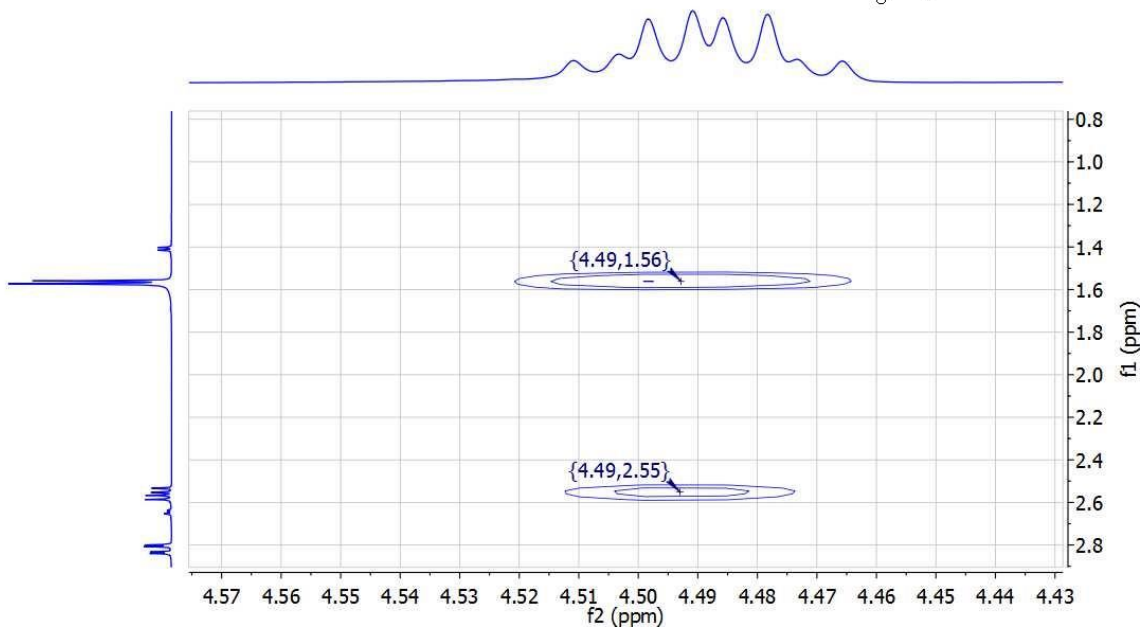

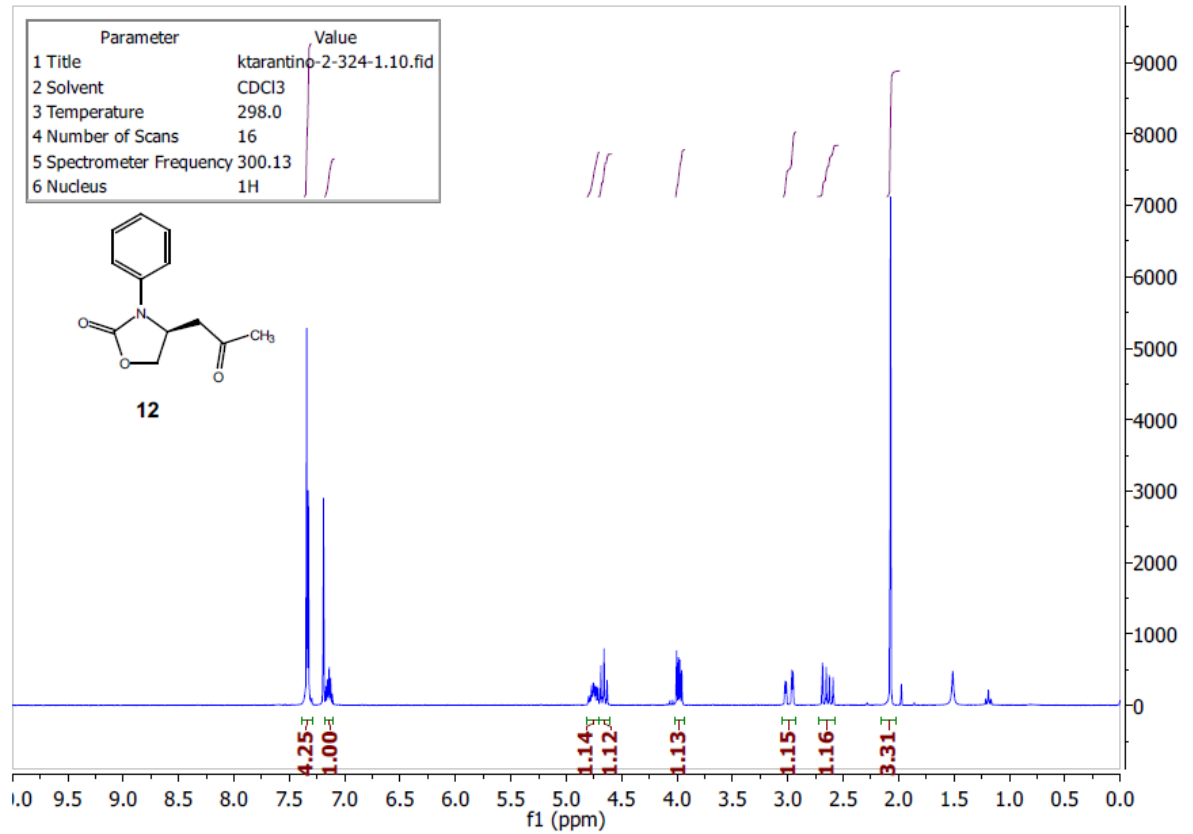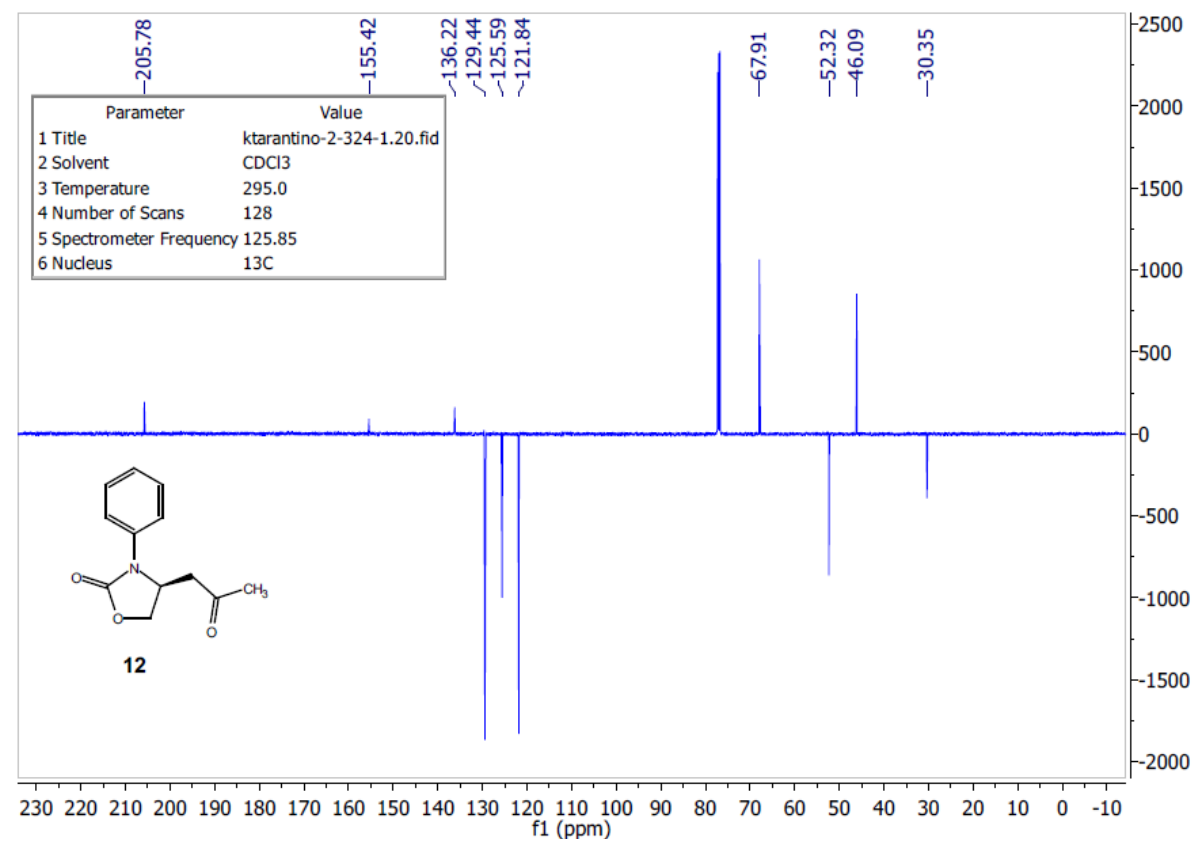

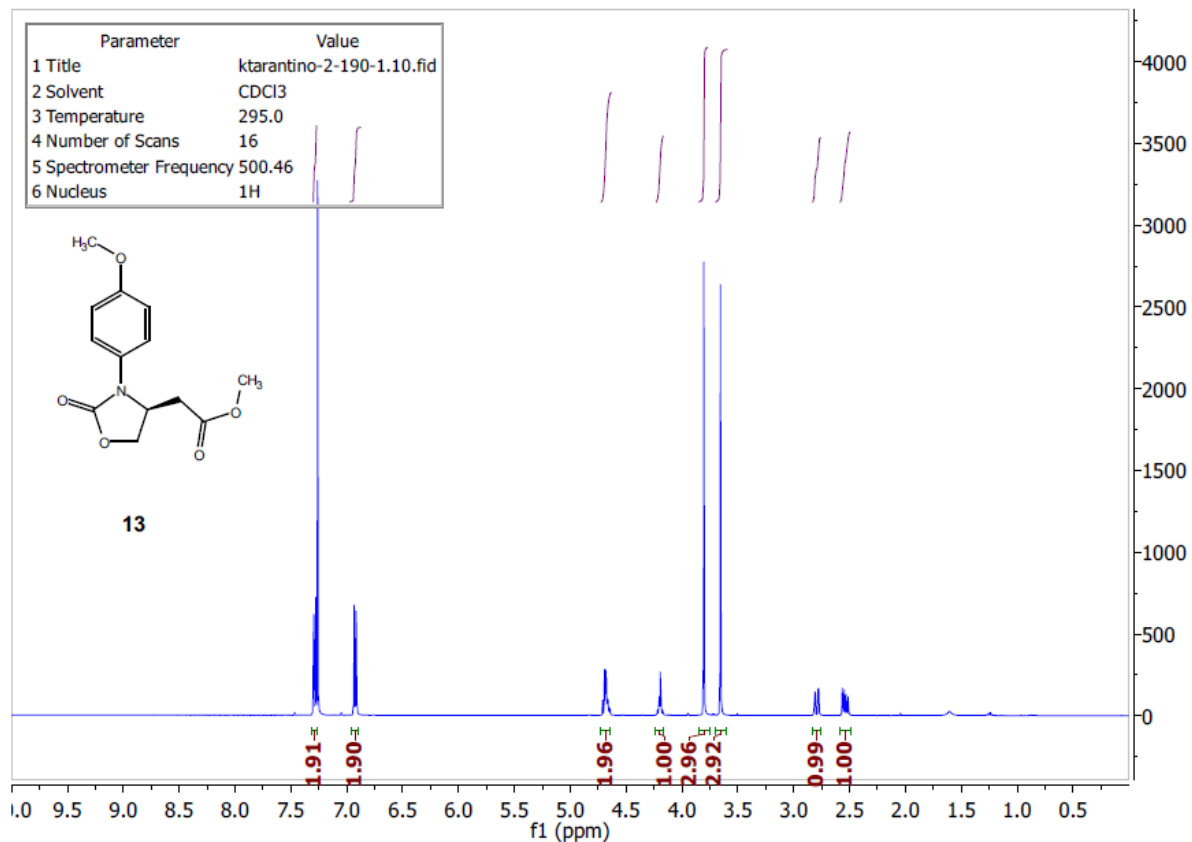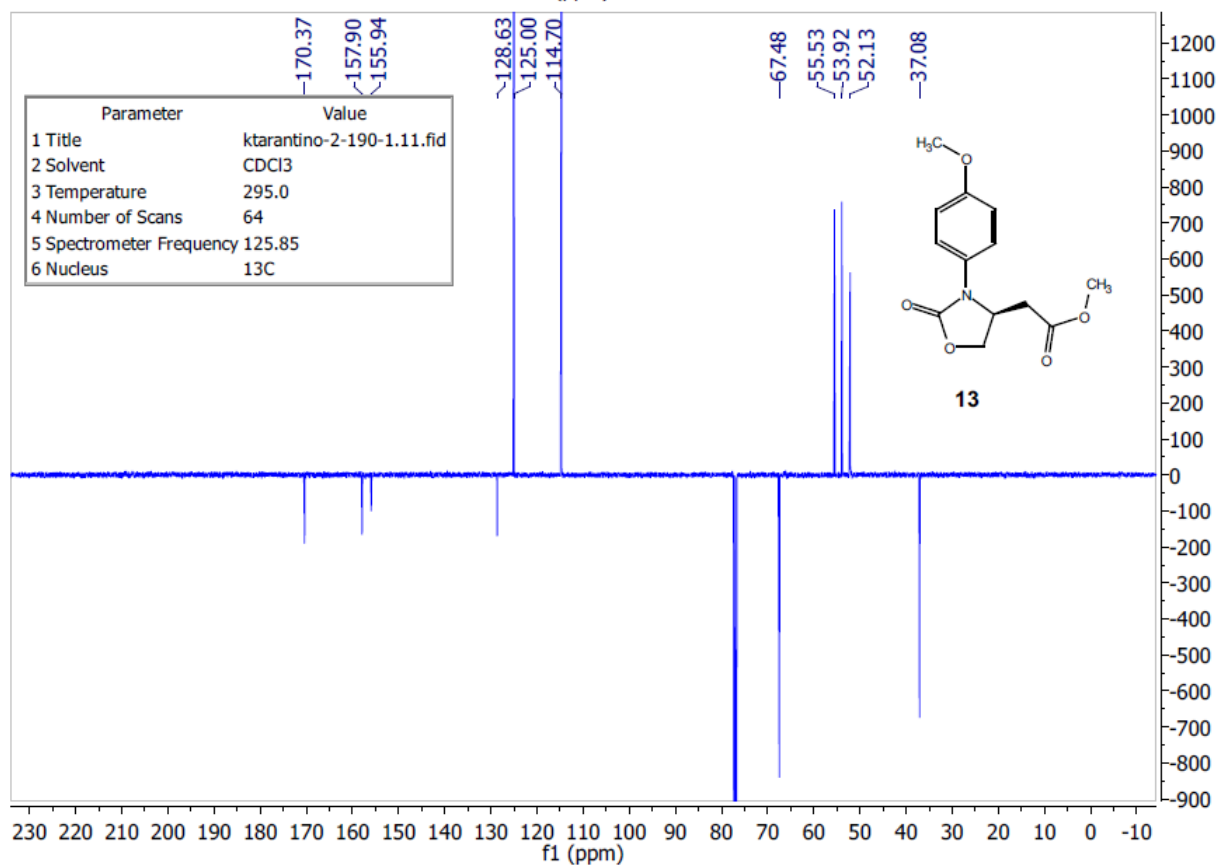

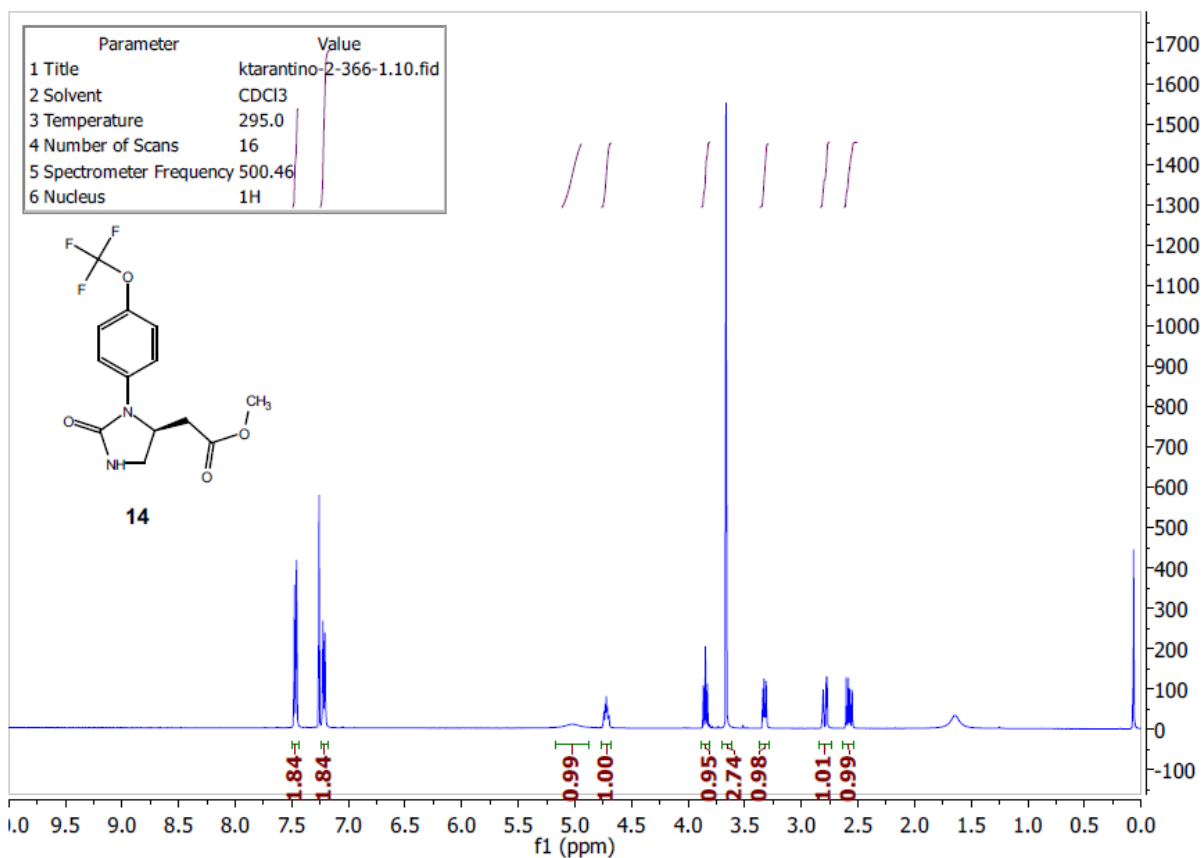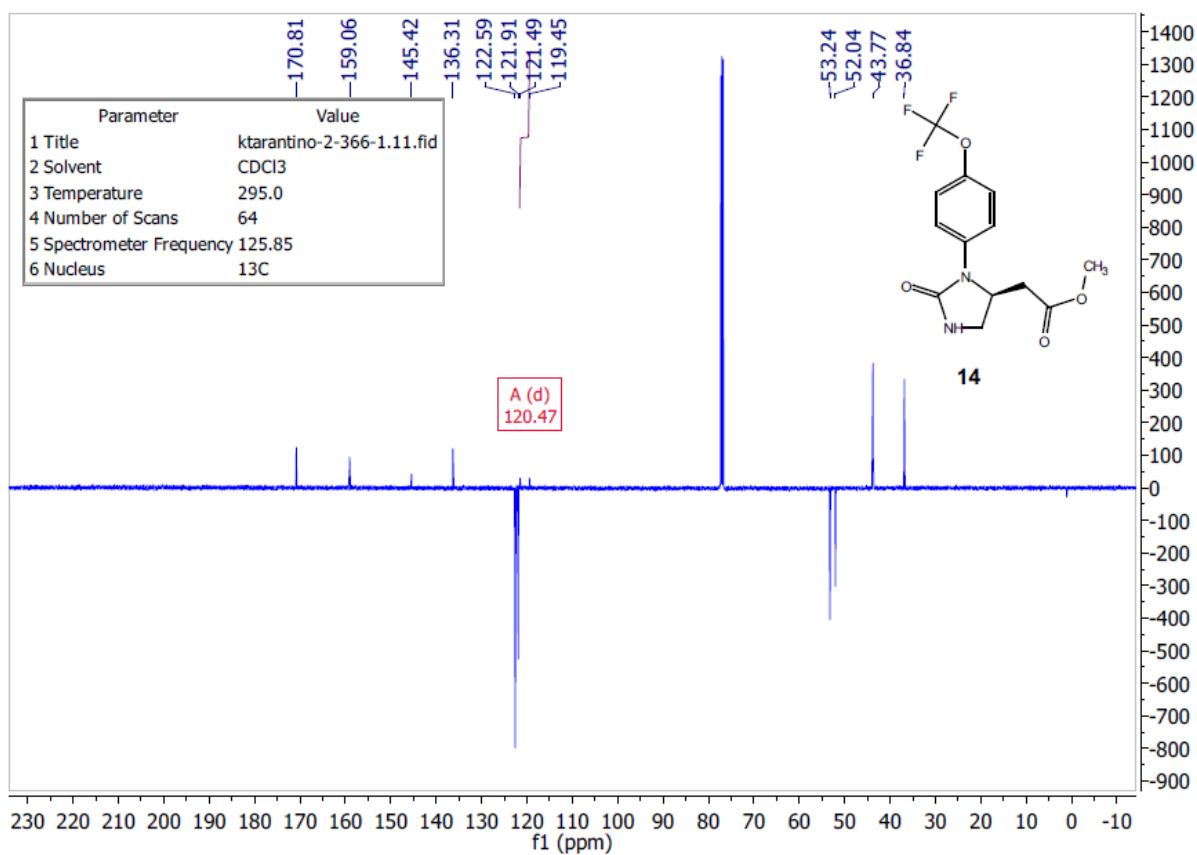

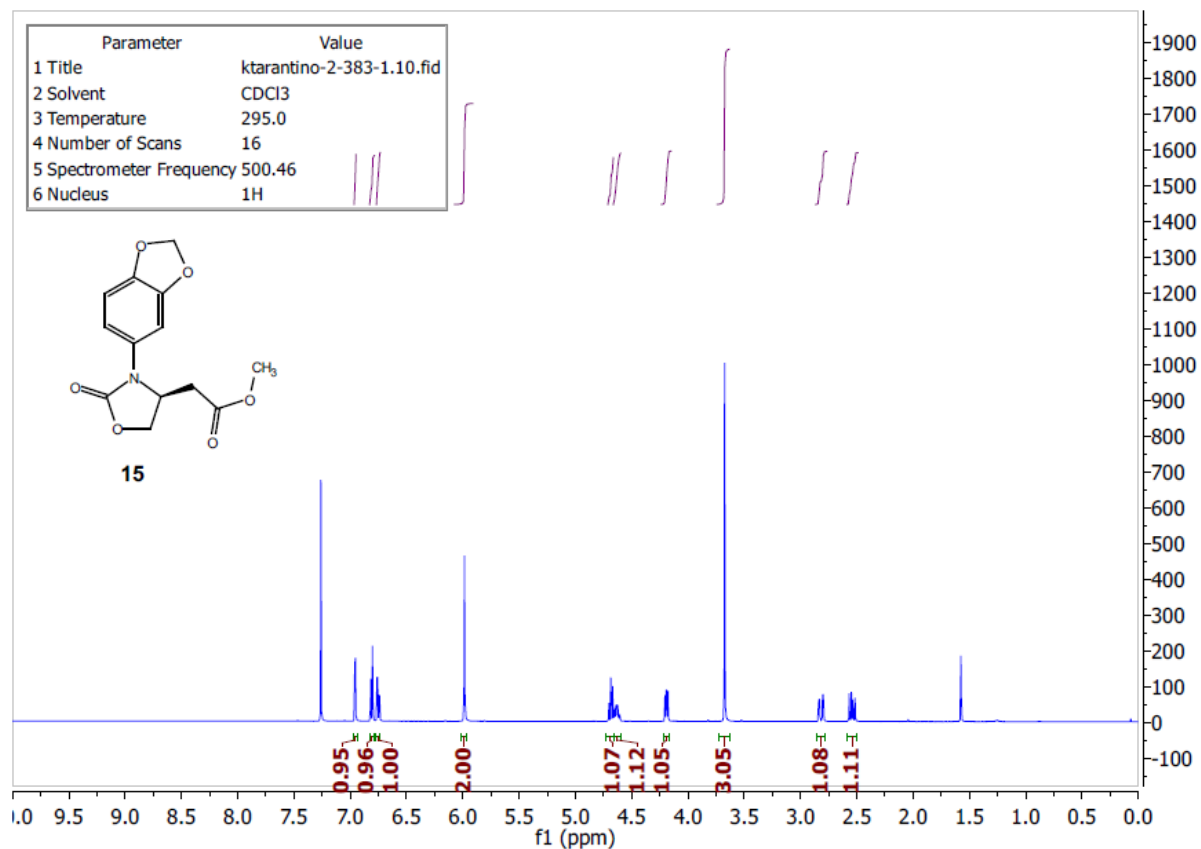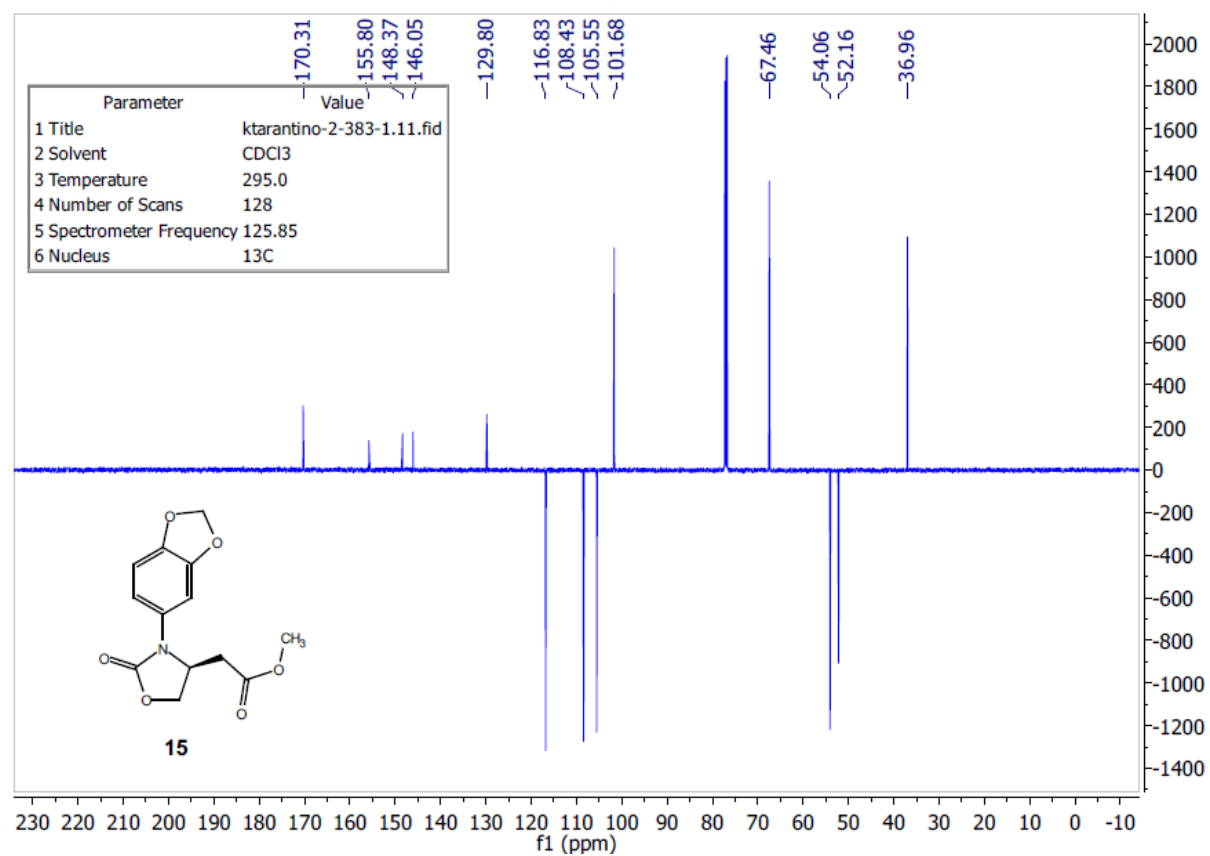

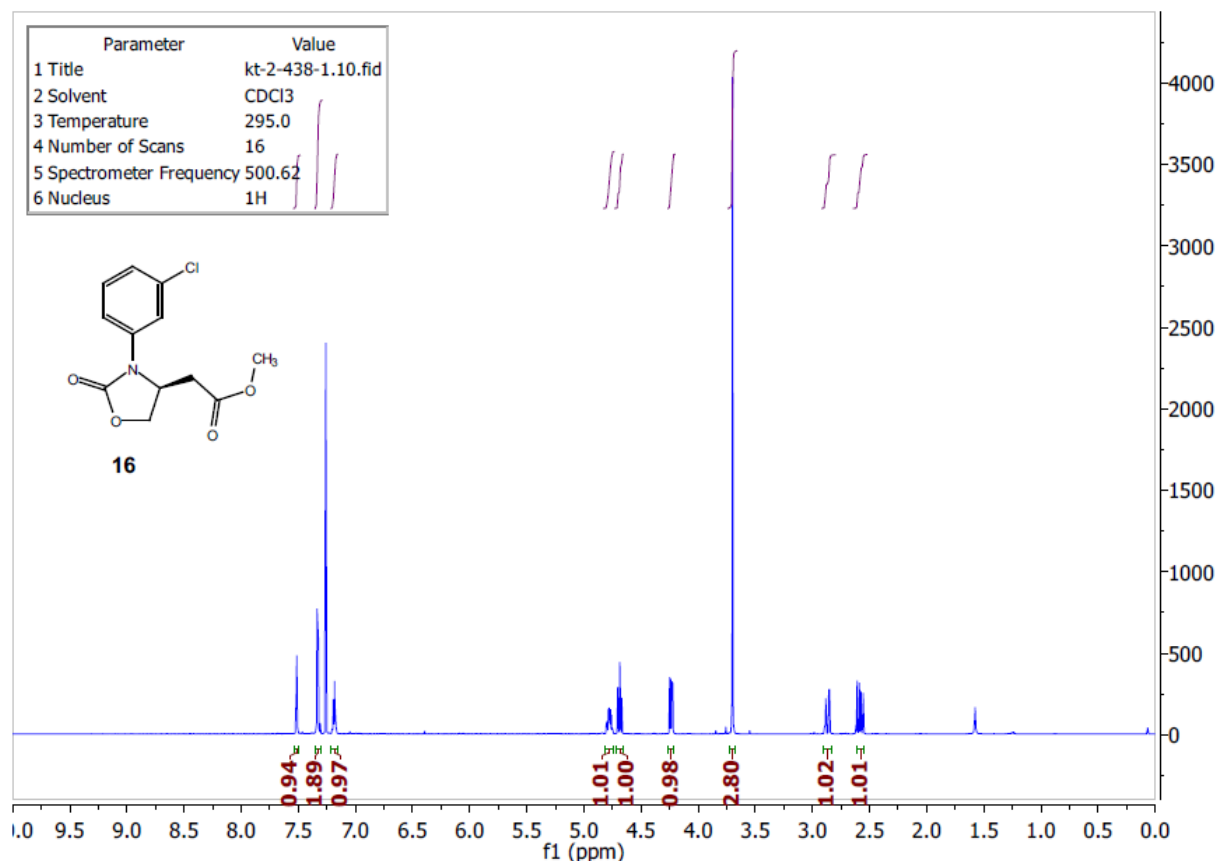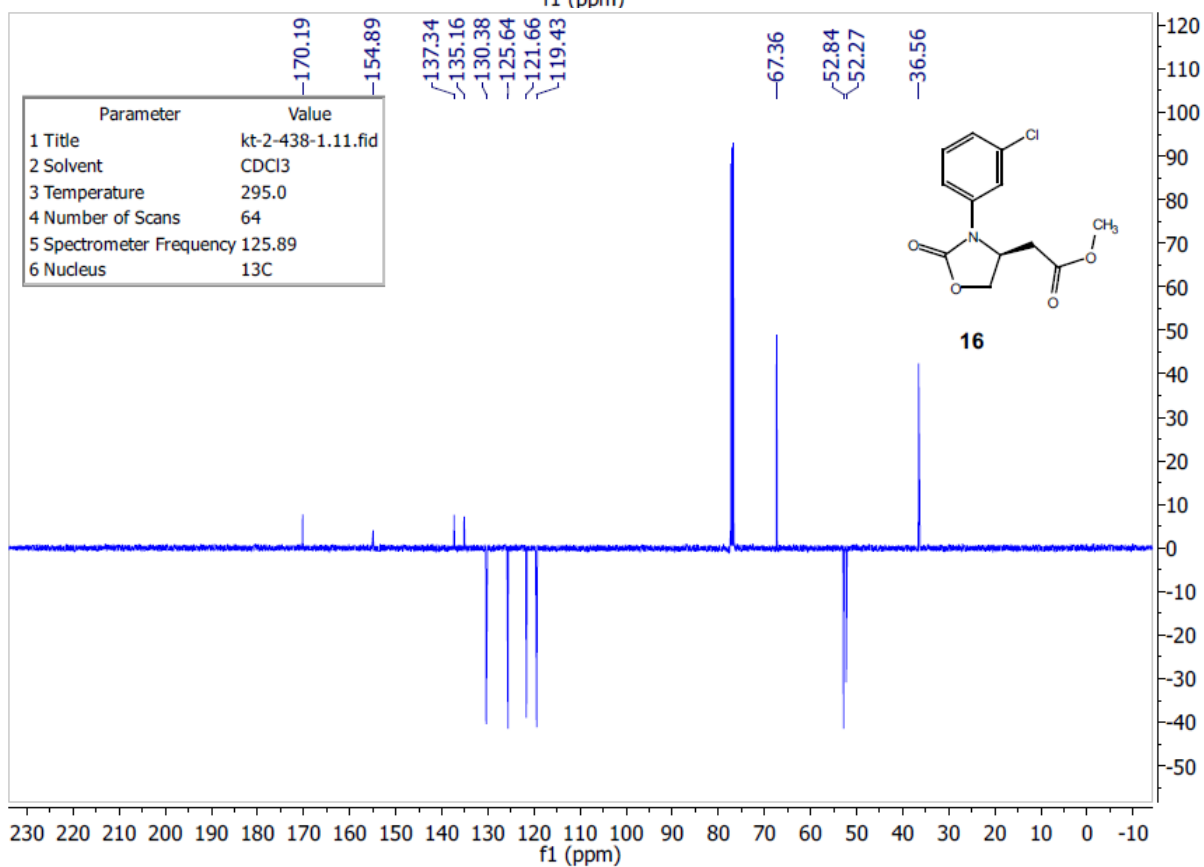

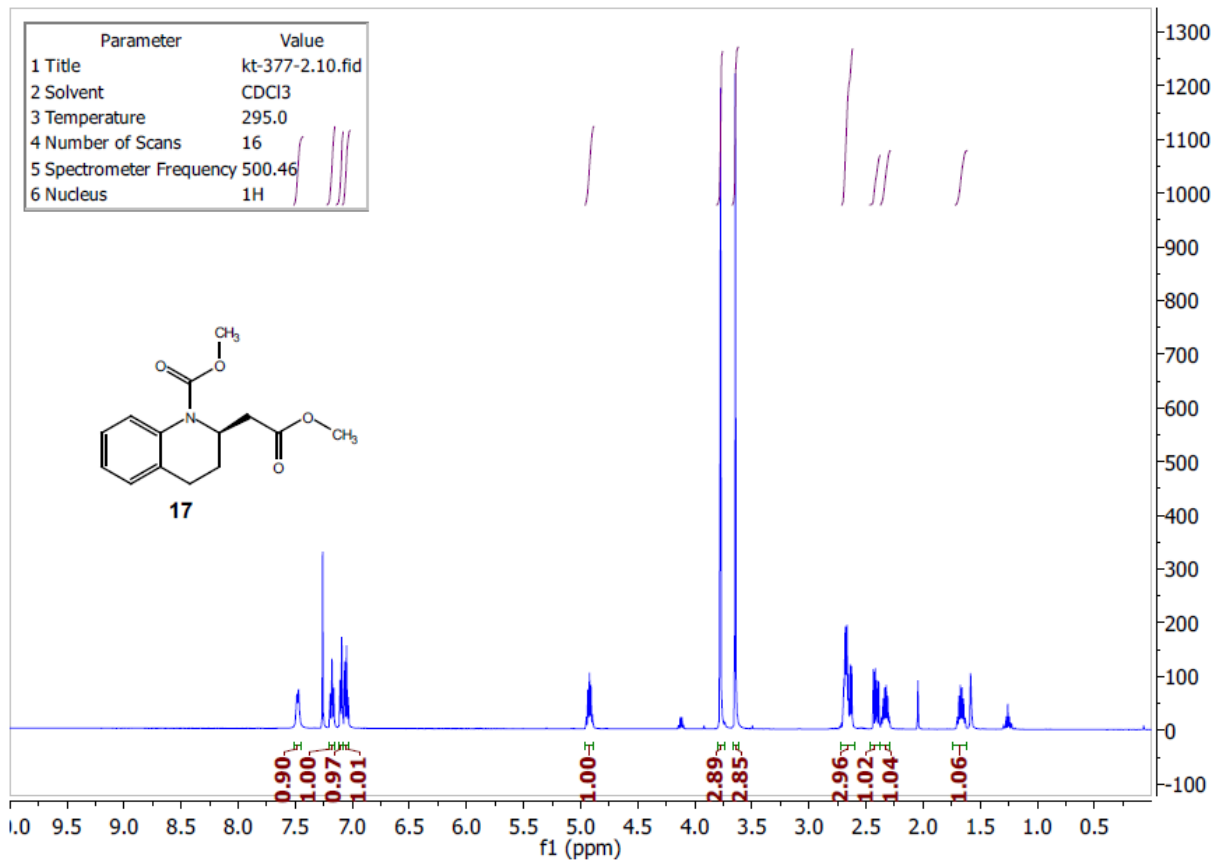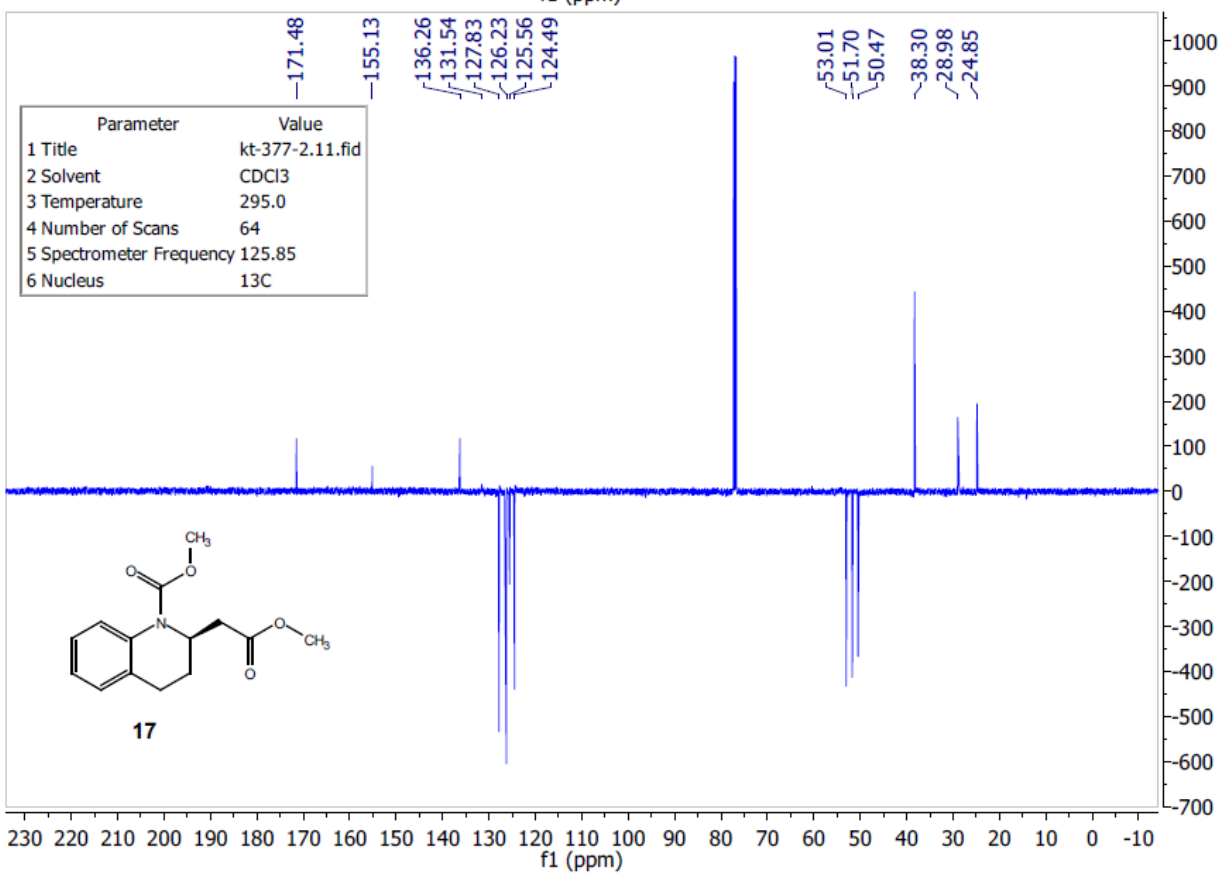



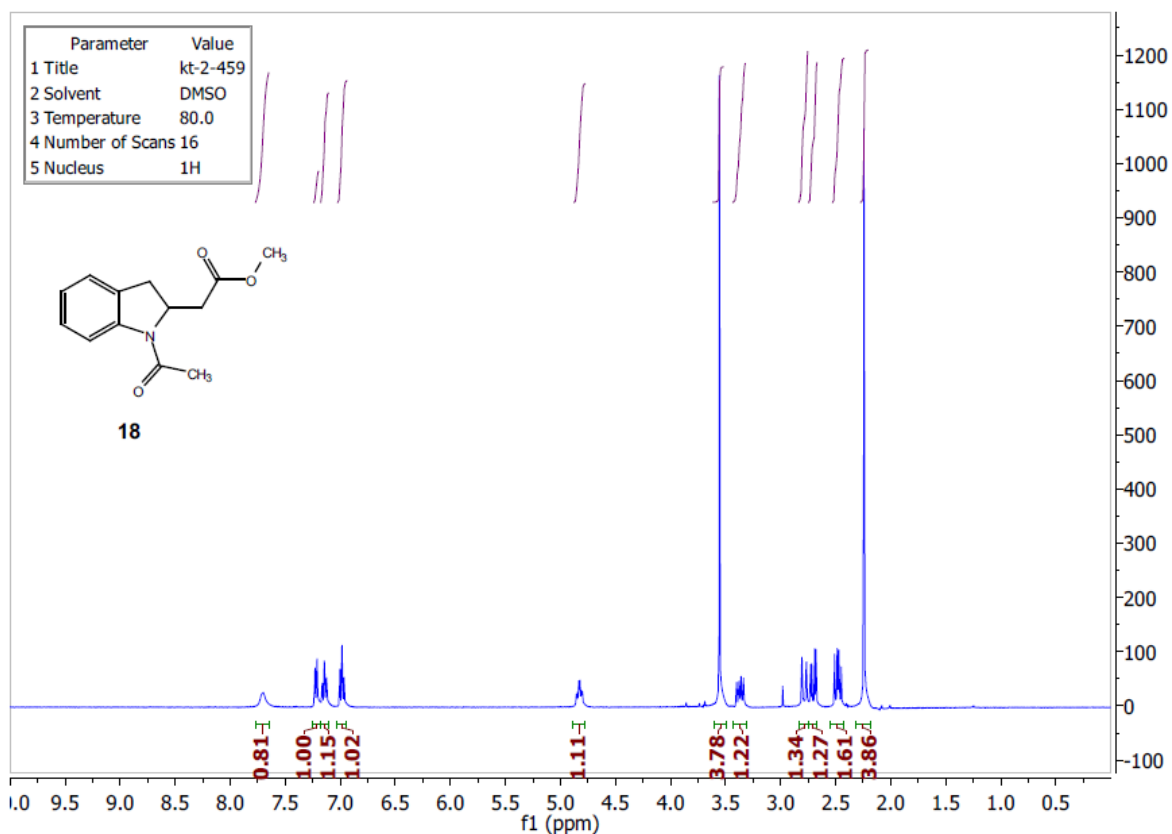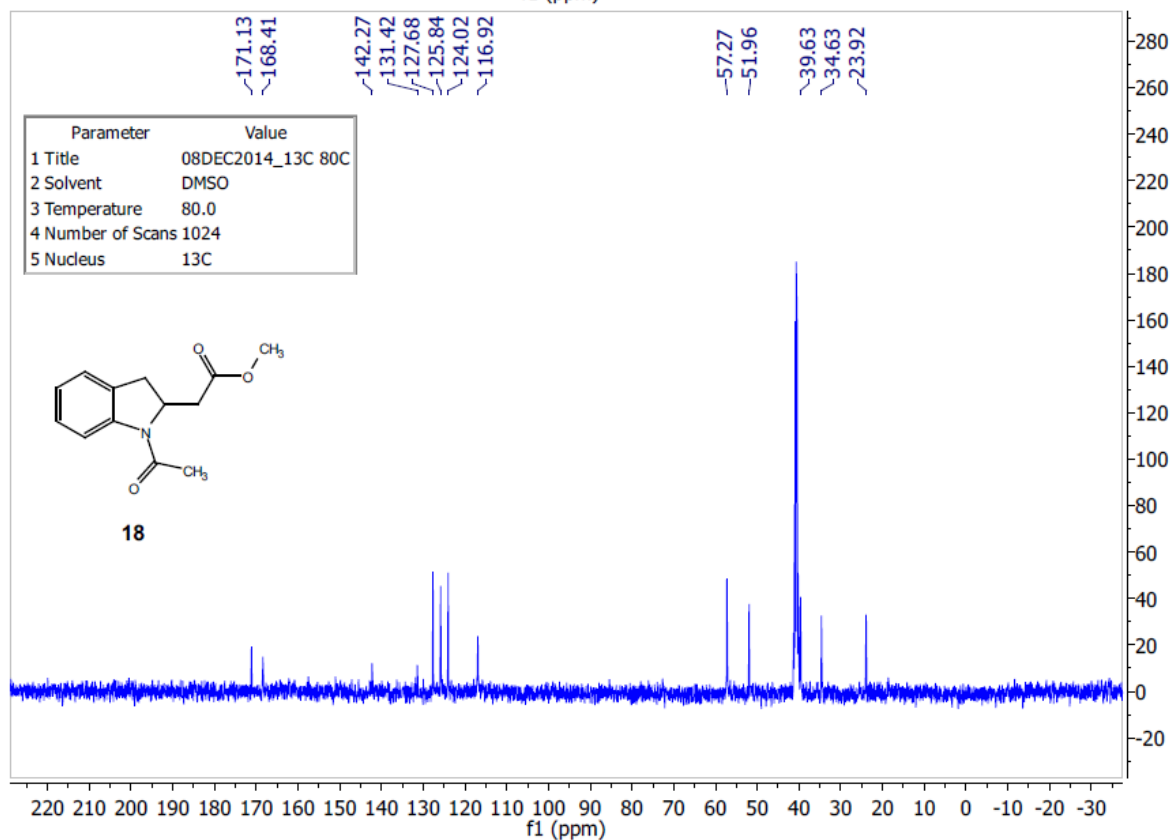

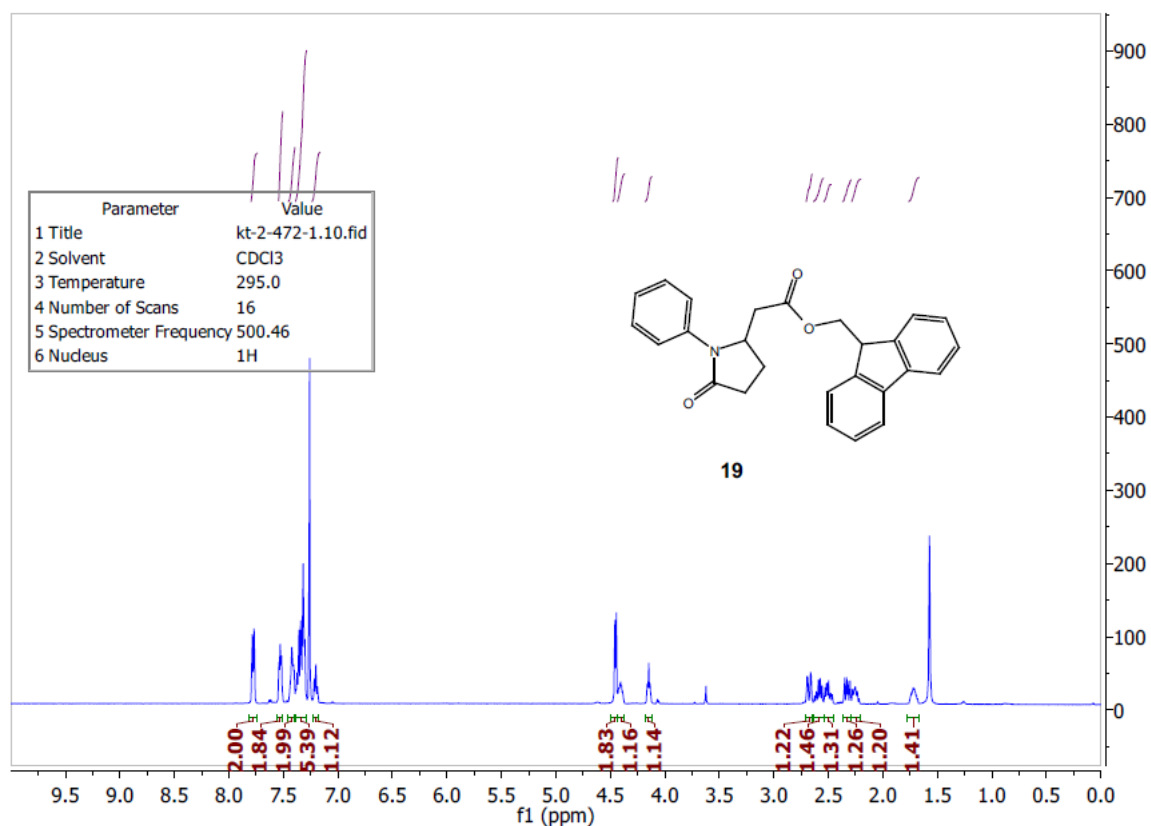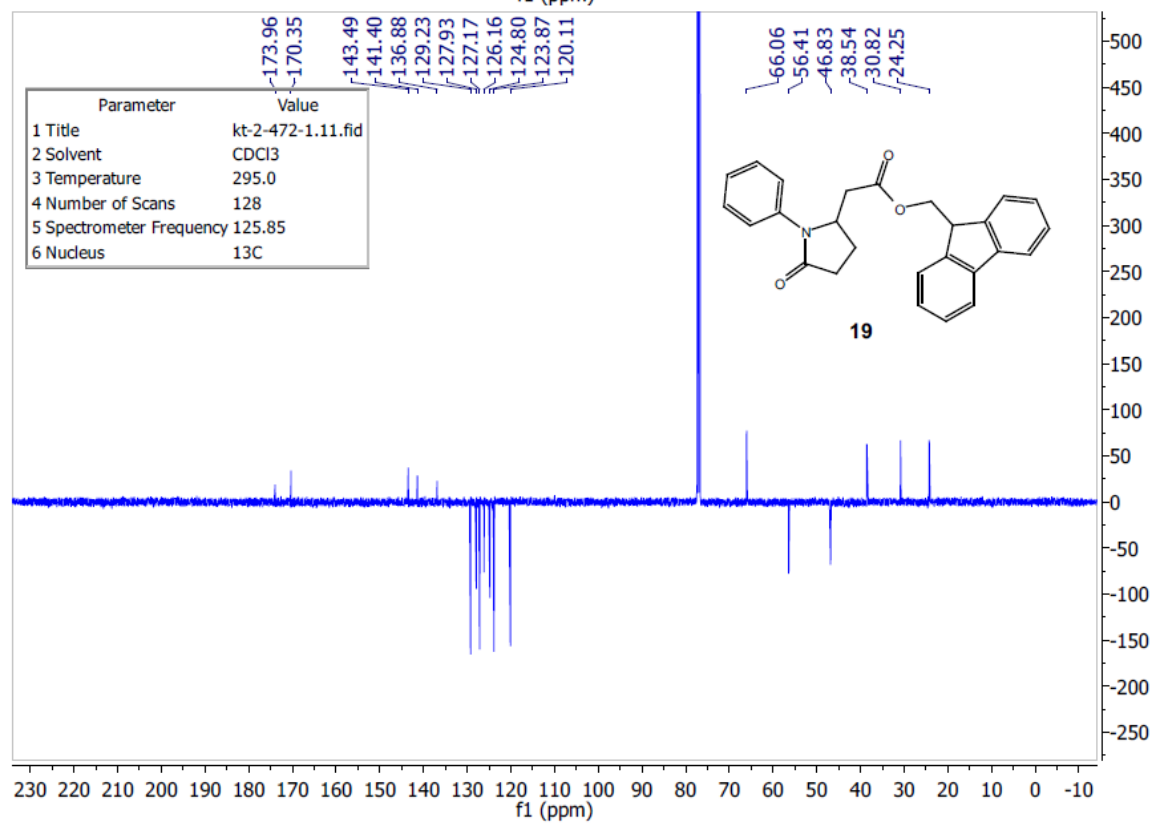

## V. Kinetic Experiments

Kinetics experiments were run in a glovebox on a 0.25 mmol scale using substrate **1** as a model substrate in anhydrous, degassed MeCN at 23 °C. In an illustrative example, **1** (62 mg, 0.25 mmol, 1 equiv) and diphenyl ether (42.5 mg, 0.25 mmol, 1 equiv, internal standard) was dissolved in anhydrous, degassed MeCN (10 mL, 0.025 M). Cp\*<sub>2</sub>Ti<sup>III</sup>Cl (4.4 mg, 0.0125 mmol, 0.05 equiv) was added and the mixture was pre-stirred for 3 minutes. Then, 0.1 mL of a stock solution of TEMPO (3.9 mg per mL MeCN) containing (0.39 mg, 0.0025 mmol, 0.01 equiv) was added and timing commenced. 0.1 mL aliquots were taken and quenched by addition to 0.1 mL a solution of Cp<sub>2</sub>Fe(BF<sub>4</sub>) (3 mg/mL MeCN, 10.9 mM). Once all time points were obtained, the vials were removed from the glovebox and filtered through ~2 cm of neutral alumina in a glass pipette and eluted with 40% isopropanol in hexanes. Samples were analyzed on a Agilent 1260 Infinity HPLC using a Zorbax – Rx Sil 5µm 4.6 x 250 mm column using a 10 minute method with 20% IPA 80% Hexanes as the eluent. UV absorbances were measured at 210 nm. Starting material conversions and yields obtained by peak area integration relative to Ph<sub>2</sub>O internal standard. All experiments were run in triplicate.

A sample HPLC trace is shown below, the peaks are: 2.975 min - Ph<sub>2</sub>O (internal standard), 3.826 min – substrate **1**, 7.940 min – product **5**.

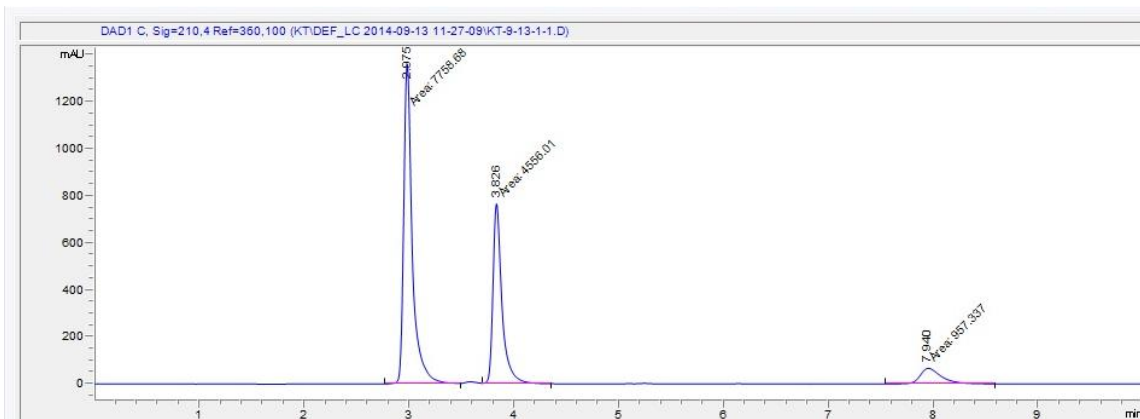

| Time(min) | Area Ph2O | Area SUB | % Conversion | Asub/AIS    | %SM      | Ln[SM]    | [SM]   |
|-----------|-----------|----------|--------------|-------------|----------|-----------|--------|
| 0.00      | 6204      | 4335     | 0.1          | 0.698742747 | 100      | -3.688879 | 0.0250 |
| 0.50      | 6235      | 3597     | 17.5         | 0.576904571 | 82.51384 | -3.881084 | 0.0206 |
| 1.00      | 6469      | 2693     | 40.5         | 0.41629309  | 59.54181 | -4.207371 | 0.0149 |
| 1.50      | 5963      | 1681     | 59.7         | 0.281905081 | 40.32048 | -4.59719  | 0.0101 |
| 2.00      | 7065      | 1506     | 69.5         | 0.213163482 | 30.48847 | -4.876701 | 0.0076 |
| 2.50      | 6361      | 846      | 81.0         | 0.132997956 | 19.02251 | -5.348427 | 0.0048 |
| 3.00      | 8342      | 912      | 84.4         | 0.109326301 | 15.63678 | -5.544424 | 0.0039 |
| 3.50      | 6749      | 541      | 88.5         | 0.080160024 | 11.46517 | -5.854736 | 0.0029 |
| 4.00      | 7568      | 521      | 90.2         | 0.068842495 | 9.846444 | -6.006939 | 0.0025 |
| 4.50      | 6749      | 362      | 92.3         | 0.053637576 | 7.671706 | -6.256511 | 0.0019 |
| 5.00      | 7139      | 309      | 93.8         | 0.043283373 | 6.190759 | -6.470992 | 0.0015 |
| 6.00      | 7837      | 255      | 95.3         | 0.032537961 | 4.653858 | -6.756353 | 0.0012 |
| 7.00      | 7852      | 208      | 96.2         | 0.026490066 | 3.788836 | -6.961991 | 0.0009 |
| 8.00      | 7554      | 162      | 96.9         | 0.021445592 | 3.067332 | -7.173241 | 0.0008 |
| 9.00      | 6541      | 116      | 97.5         | 0.017734291 | 2.53651  | -7.36326  | 0.0006 |
| 10.00     | 7212      | 112      | 97.8         | 0.015529673 | 2.221187 | -7.496008 | 0.0006 |

**Table S1** 5 mol% Cp\*2TiCl, 2 mol% TEMPO, 0.025 M substrate **1** in MeCN – Run 1

| Time(min) | Area Ph2O | Area SUB | % Conversion | Asub/AIS    | %SM      | Ln[SM]    | [SM]   |
|-----------|-----------|----------|--------------|-------------|----------|-----------|--------|
| 0.00      | 6696      | 4683     | 6.8          | 0.69937276  | 100      | -3.688879 | 0.0250 |
| 0.50      | 7656      | 4770     | 16.9         | 0.623040752 | 83.0721  | -3.874341 | 0.0208 |
| 1.00      | 7225      | 3422     | 36.8         | 0.473633218 | 63.1511  | -4.148519 | 0.0158 |
| 1.50      | 6856      | 2235     | 56.5         | 0.325991832 | 43.46558 | -4.52208  | 0.0109 |
| 2.00      | 6979      | 1856     | 64.5         | 0.265940679 | 35.45876 | -4.725679 | 0.0089 |
| 2.50      | 6819      | 1251     | 75.5         | 0.183457985 | 24.46106 | -5.096967 | 0.0061 |
| 3.00      | 7594      | 1149     | 79.8         | 0.151303661 | 20.17382 | -5.289664 | 0.0050 |
| 3.50      | 6561      | 737      | 85.0         | 0.112330437 | 14.97739 | -5.587508 | 0.0037 |
| 4.00      | 7016      | 595      | 88.7         | 0.084806157 | 11.30749 | -5.868585 | 0.0028 |
| 4.50      | 7329      | 540      | 90.2         | 0.073679902 | 9.823987 | -6.009223 | 0.0025 |
| 5.00      | 6337      | 381      | 92.0         | 0.060123087 | 8.016412 | -6.212559 | 0.0020 |
| 6.00      | 7108      | 339      | 93.6         | 0.047692741 | 6.359032 | -6.444173 | 0.0016 |
| 7.00      | 7687      | 315      | 94.5         | 0.040978275 | 5.46377  | -6.595911 | 0.0014 |
| 8.00      | 6991      | 228      | 95.7         | 0.03261336  | 4.348448 | -6.824231 | 0.0011 |
| 9.00      | 7561      | 189      | 96.7         | 0.024996694 | 3.332892 | -7.090209 | 0.0008 |
| 10.00     | 6400      | 142      | 97.0         | 0.0221875   | 2.958333 | -7.209424 | 0.0007 |

**Table S2** 5 mol% Cp\*2TiCl<sub>4</sub>, 2 mol% TEMPO, 0.025 M substrate **1** in MeCN – Run 2

| Time(min) | Area Ph2O | Area SUB | % Conversion | Asub/AIS   | %SM      | Ln[SM]    | [SM]   |
|-----------|-----------|----------|--------------|------------|----------|-----------|--------|
| 0.00      | 6594      | 4400     | 0.3          | 0.66727328 | 100      | -3.688879 | 0.0250 |
| 0.50      | 6275      | 4069     | 14.7         | 0.64844622 | 85.32187 | -3.847619 | 0.0213 |
| 1.00      | 5614      | 3116     | 27.0         | 0.55504097 | 73.03171 | -4.003156 | 0.0183 |
| 1.50      | 5016      | 1906     | 50.0         | 0.37998405 | 49.9979  | -4.382069 | 0.0125 |
| 2.00      | 6490      | 2150     | 56.4         | 0.33127889 | 43.58933 | -4.519237 | 0.0109 |
| 2.50      | 5150      | 1209     | 69.1         | 0.23475728 | 30.88912 | -4.863646 | 0.0077 |
| 3.00      | 5412      | 890      | 78.4         | 0.16444937 | 21.63808 | -5.219595 | 0.0054 |
| 3.50      | 6157      | 858      | 81.7         | 0.13935358 | 18.336   | -5.385183 | 0.0046 |
| 4.00      | 5782      | 666      | 84.8         | 0.11518506 | 15.15593 | -5.575658 | 0.0038 |
| 4.50      | 6218      | 609      | 87.1         | 0.09794146 | 12.88703 | -5.737828 | 0.0032 |
| 5.00      | 5687      | 442      | 89.8         | 0.07772112 | 10.22646 | -5.969071 | 0.0026 |
| 6.00      | 7514      | 495      | 91.3         | 0.06587703 | 8.66803  | -6.134408 | 0.0022 |
| 7.00      | 5257      | 197      | 95.1         | 0.03747384 | 4.930769 | -6.698555 | 0.0012 |
| 8.00      | 6310      | 273      | 94.3         | 0.04326466 | 5.692718 | -6.554862 | 0.0014 |
| 9.00      | 6998      | 265      | 95.0         | 0.03786796 | 4.982627 | -6.688092 | 0.0012 |
| 10.00     | 4797      | 172      | 95.3         | 0.03585574 | 4.717861 | -6.742694 | 0.0012 |

**Table S3** 5 mol% Cp\*2TiCl<sub>4</sub>, 2 mol% TEMPO, 0.025 M substrate **1** in MeCN – Run 3

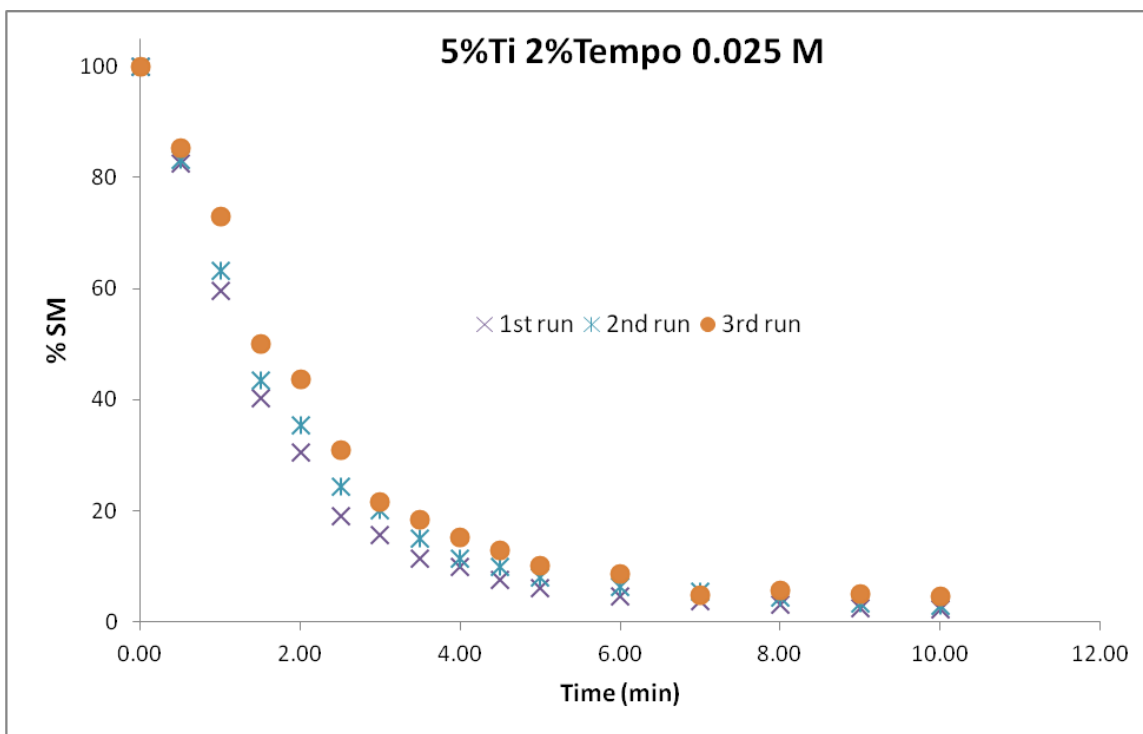

**Figure S1** Overlay of 3 kinetic runs using 5 mol%  $\text{Cp}^*_2\text{TiCl}$ , 2 mol% TEMPO and 0.025 M substrate **1** in MeCN.

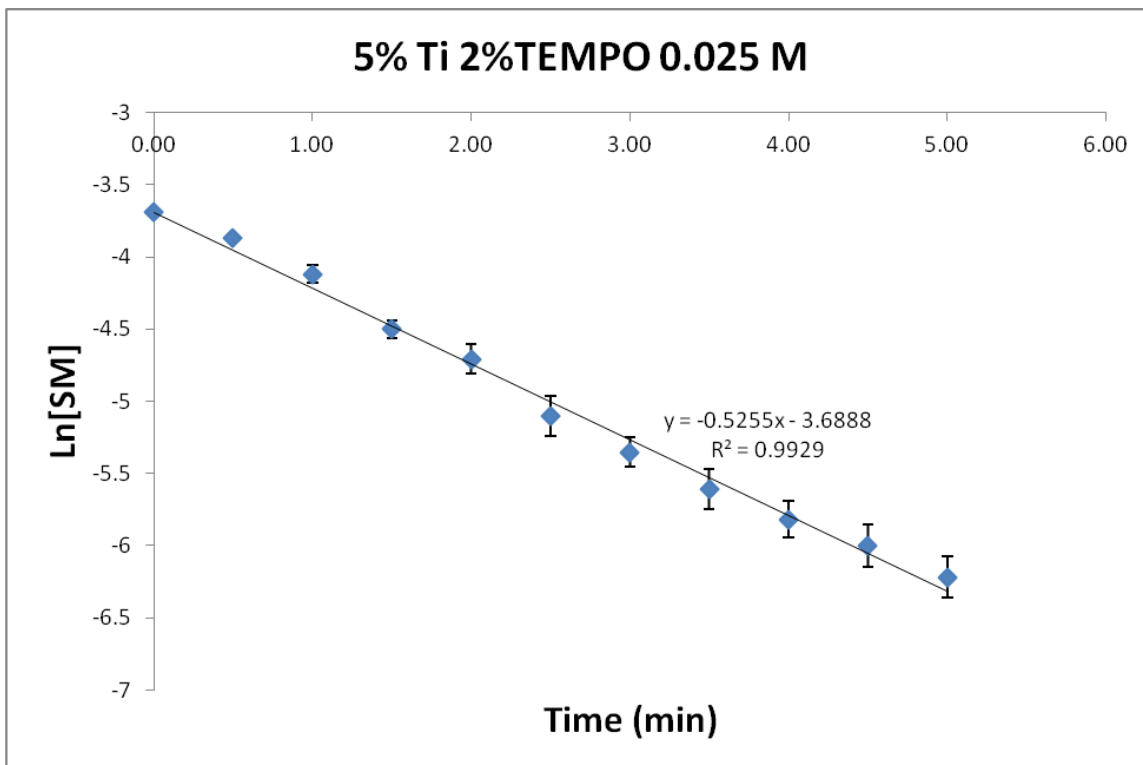

**Figure S2** Graph of Ln[SM] vs time for the mean of the 3 runs using 5 mol% Cp\*<sub>2</sub>TiCl, 2 mol% TEMPO and 0.025 M substrate **1** in MeCN. Error bars calculated using standard error of the mean (standard deviation / sqrt(n))



| Time (min) | Area Ph2O | Area SUB | % Conversion | Asub/AIS    | %SM      | Ln[SM]    | [SM]   |
|------------|-----------|----------|--------------|-------------|----------|-----------|--------|
| 0.00       | 4629      | 410      | 1.6          | 0.643551523 | 100      | -3.688879 | 0.0250 |
| 0.50       | 6170      | 4746     | 14.5         | 0.769205835 | 85.46731 | -3.845916 | 0.0214 |
| 1.00       | 4941      | 2834     | 36.3         | 0.573568104 | 63.72979 | -4.139398 | 0.0159 |
| 1.50       | 5777      | 2919     | 43.9         | 0.505279557 | 56.14217 | -4.266162 | 0.0140 |
| 2.00       | 5837      | 2125     | 59.5         | 0.364056879 | 40.45076 | -4.593964 | 0.0101 |
| 2.50       | 7076      | 2106     | 66.9         | 0.297625777 | 33.06953 | -4.795437 | 0.0083 |
| 3.00       | 7364      | 1677     | 74.7         | 0.227729495 | 25.30328 | -5.063116 | 0.0063 |
| 3.50       | 5756      | 1035     | 80.0         | 0.17981237  | 19.97915 | -5.29936  | 0.0050 |
| 4.00       | 5313      | 722      | 84.9         | 0.135893092 | 15.09923 | -5.579406 | 0.0038 |
| 4.50       | 6773      | 844      | 86.2         | 0.124612432 | 13.84583 | -5.666066 | 0.0035 |
| 5.00       | 5237      | 491      | 89.6         | 0.093755967 | 10.41733 | -5.950579 | 0.0026 |
| 6.00       | 5096      | 335      | 92.7         | 0.065737834 | 7.304204 | -6.3056   | 0.0018 |
| 7.00       | 6833      | 386      | 93.7         | 0.056490561 | 6.276729 | -6.457201 | 0.0016 |
| 8.00       | 6366      | 306      | 94.7         | 0.048067861 | 5.340873 | -6.61866  | 0.0013 |
| 9.00       | 6077      | 263      | 95.2         | 0.043277933 | 4.808659 | -6.723631 | 0.0012 |
| 10.00      | 6181      | 221      | 96.0         | 0.035754732 | 3.972748 | -6.914592 | 0.0010 |

**Table S4** 4 mol% Cp\*2TiCl<sub>2</sub>, 2 mol% TEMPO, 0.025 M Substrate **1** in MeCN – Run 1

| Time (min) | Area Ph2O | Area SUB | % Conversion | Asub/AIS    | %SM      | Ln[SM]    | [SM]   |
|------------|-----------|----------|--------------|-------------|----------|-----------|--------|
| 0.00       | 5376      | 4810     | 0.6          | 0.670572917 | 100      | -3.688879 | 0.0250 |
| 0.50       | 6149      | 4750     | 18.7         | 0.772483331 | 81.31403 | -3.895731 | 0.0203 |
| 1.00       | 5942      | 3863     | 31.6         | 0.650117805 | 68.43345 | -4.068188 | 0.0171 |
| 1.50       | 5869      | 3604     | 35.4         | 0.614073948 | 64.63936 | -4.125226 | 0.0162 |
| 2.00       | 7373      | 3200     | 54.3         | 0.434016004 | 45.6859  | -4.47226  | 0.0114 |
| 2.50       | 5959      | 2300     | 59.4         | 0.3859708   | 40.62851 | -4.58958  | 0.0102 |
| 3.00       | 7227      | 2600     | 62.1         | 0.359762004 | 37.86968 | -4.659899 | 0.0095 |
| 3.50       | 7693      | 2513     | 65.6         | 0.326660601 | 34.38533 | -4.75642  | 0.0086 |
| 4.00       | 5860      | 1300     | 76.6         | 0.221843003 | 23.3519  | -5.143371 | 0.0058 |
| 4.50       | 6256      | 2030     | 65.8         | 0.324488491 | 34.15668 | -4.763091 | 0.0085 |
| 5.00       | 5853      | 1554     | 72.1         | 0.265504869 | 27.94788 | -4.963708 | 0.0070 |
| 6.00       | 6038      | 1369     | 76.1         | 0.226730706 | 23.86639 | -5.121578 | 0.0060 |
| 7.00       | 6011      | 1175     | 79.4         | 0.195474963 | 20.57631 | -5.269909 | 0.0051 |
| 8.00       | 7301      | 1526     | 78.0         | 0.209012464 | 22.00131 | -5.202948 | 0.0055 |
| 9.00       | 5100      | 818      | 83.1         | 0.160392157 | 16.88338 | -5.46772  | 0.0042 |
| 10.00      | 6573      | 1199     | 80.8         | 0.182412901 | 19.20136 | -5.339069 | 0.0048 |

**Table S5** 4 mol% Cp\*2TiCl<sub>2</sub>, 2 mol% TEMPO, 0.025 M Substrate **1** in MeCN – Run 2

| Time (min) | Area Ph2O | Area SUB | % Conversion | Asub/AIS   | %SM      | Ln[SM]    | [SM]   |
|------------|-----------|----------|--------------|------------|----------|-----------|--------|
| 0.00       | 5171      | 4800     | -3.1         | 0.92825372 | 100      | -3.688879 | 0.0250 |
| 0.50       | 7149      | 5505     | 18.1         | 0.77003777 | 81.91891 | -3.88832  | 0.0205 |
| 1.00       | 6756      | 4285     | 32.5         | 0.63425104 | 67.47351 | -4.082314 | 0.0169 |
| 1.50       | 6236      | 3538     | 39.6         | 0.56735087 | 60.35648 | -4.193781 | 0.0151 |
| 2.00       | 6347      | 3097     | 48.1         | 0.48794706 | 51.90926 | -4.344552 | 0.0130 |
| 2.50       | 6655      | 2840     | 54.6         | 0.42674681 | 45.3986  | -4.478568 | 0.0113 |
| 3.00       | 5156      | 1614     | 66.7         | 0.31303336 | 33.30142 | -4.78845  | 0.0083 |
| 3.50       | 5600      | 1634     | 69.0         | 0.29178571 | 31.04103 | -4.85874  | 0.0078 |
| 4.00       | 6483      | 1607     | 73.6         | 0.24787907 | 26.37011 | -5.021818 | 0.0066 |
| 4.50       | 6852      | 1715     | 73.4         | 0.25029189 | 26.6268  | -5.012132 | 0.0067 |
| 5.00       | 6422      | 1345     | 77.7         | 0.20943631 | 22.28046 | -5.19034  | 0.0056 |
| 6.00       | 6596      | 1162     | 81.3         | 0.17616737 | 18.74121 | -5.363325 | 0.0047 |
| 7.00       | 7161      | 1134     | 83.2         | 0.15835777 | 16.84657 | -5.469902 | 0.0042 |
| 8.00       | 6850      | 942      | 85.4         | 0.13751825 | 14.6296  | -5.611003 | 0.0037 |
| 9.00       | 6376      | 679      | 88.7         | 0.1064931  | 11.32905 | -5.866679 | 0.0028 |
| 10.00      | 6830      | 786      | 87.8         | 0.11508053 | 12.24261 | -5.789127 | 0.0031 |

**Table S6** 4 mol% Cp\*2TiCl, 2 mol% TEMPO, 0.025 M Substrate **1** in MeCN – Run 3

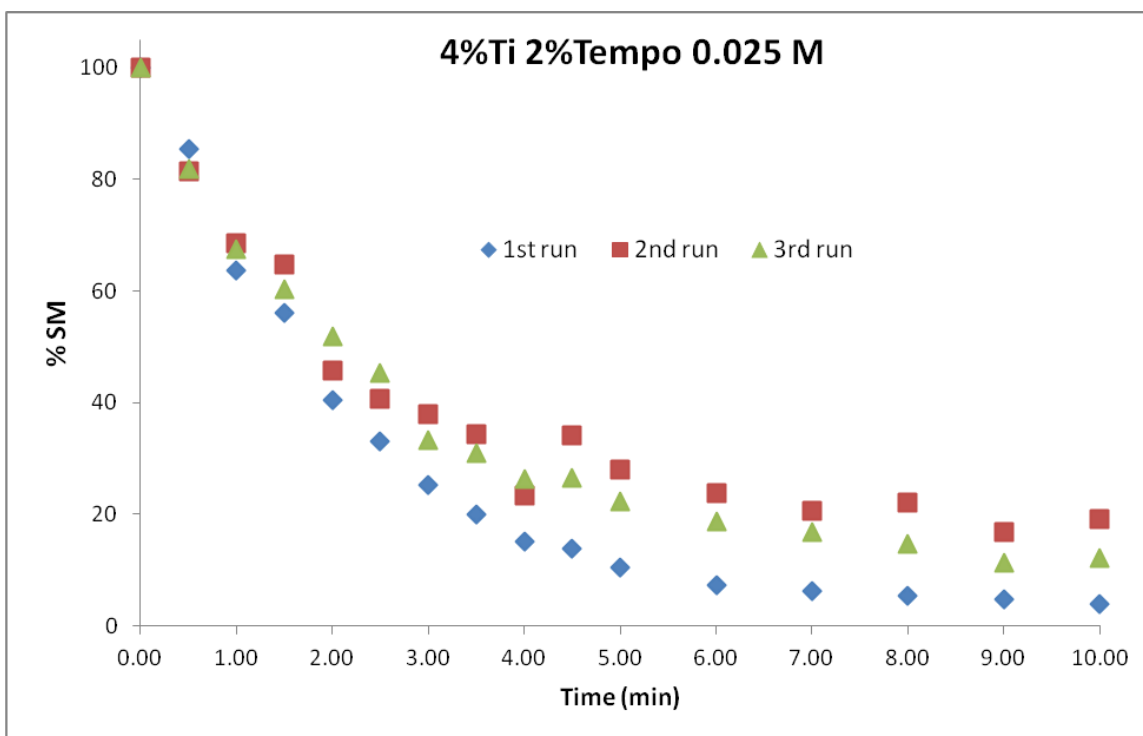

**Figure S3** Overlay of 3 independent kinetic runs with 4 mol% Cp\*<sub>2</sub>TiCl, 2 mol% TEMPO, 0.025 M substrate **1** in MeCN.

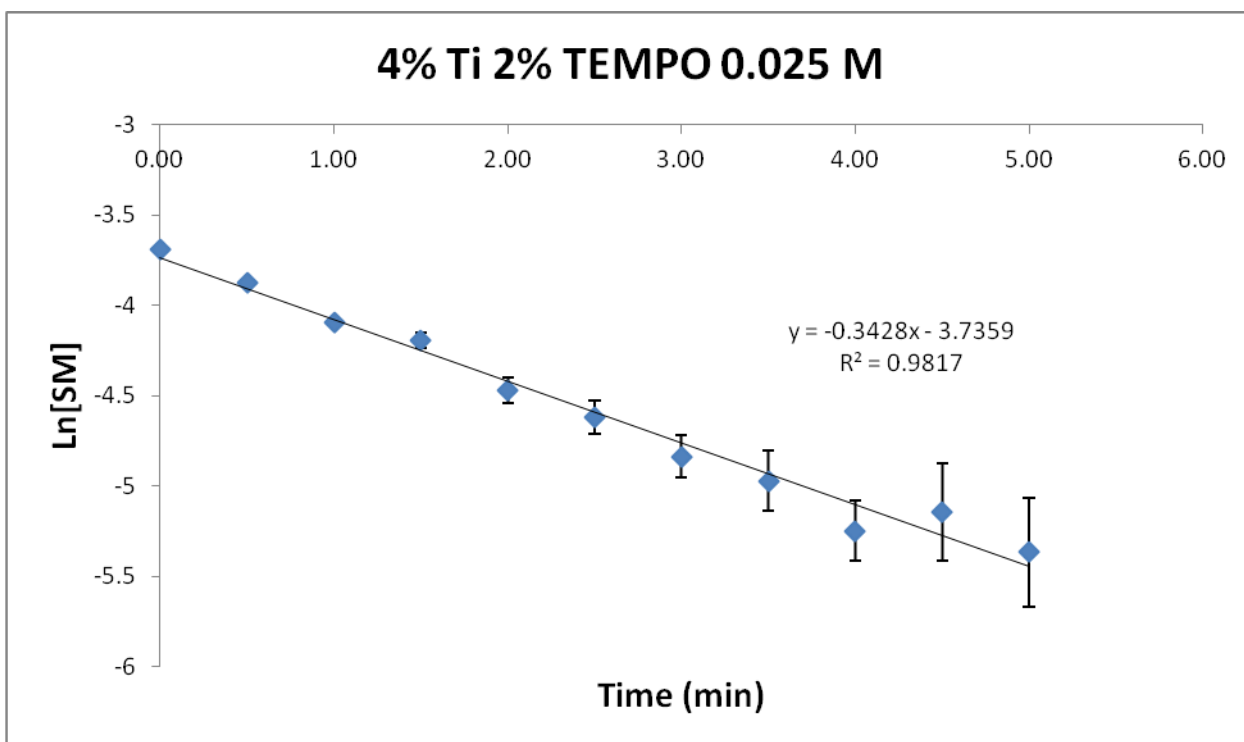

**Figure S4** Graph of Ln[SM] vs time for average of 3 kinetic runs with 4 mol% Cp\*<sub>2</sub>TiCl, 2 mol% TEMPO, 0.025 M substrate **1** in MeCN. Error bars calculated using standard error of the mean (standard deviation / sqrt(n))

| Time (min) | Area Ph2O | Area SUB | % Conversion | Asub/AIS    | %SM      | Ln[SM]      | [SM]   |
|------------|-----------|----------|--------------|-------------|----------|-------------|--------|
| 0.00       | 4590      | 3910     | 0.9          | 0.851851852 | 100      | -3.68887945 | 0.0250 |
| 0.50       | 3973      | 2890     | 15.4         | 0.727410018 | 84.58256 | -3.85632154 | 0.0211 |
| 1.00       | 5924      | 3900     | 23.4         | 0.65833896  | 76.55104 | -3.95609191 | 0.0191 |
| 1.50       | 5345      | 3100     | 32.6         | 0.579981291 | 67.43968 | -4.082816   | 0.0169 |
| 2.00       | 5552      | 2898     | 39.3         | 0.521974063 | 60.69466 | -4.18819394 | 0.0152 |
| 2.50       | 6334      | 3027     | 44.4         | 0.477897063 | 55.56943 | -4.27641648 | 0.0139 |
| 3.00       | 6136      | 2388     | 54.7         | 0.389178618 | 45.25333 | -4.48177343 | 0.0113 |
| 3.50       | 6821      | 2407     | 59.0         | 0.352880809 | 41.03265 | -4.57968149 | 0.0103 |
| 4.00       | 5402      | 1572     | 66.2         | 0.291003332 | 33.8376  | -4.77247713 | 0.0085 |
| 4.50       | 5634      | 1437     | 70.3         | 0.255058573 | 29.65797 | -4.90431863 | 0.0074 |
| 5.00       | 6224      | 1381     | 74.2         | 0.221883033 | 25.80035 | -5.04366148 | 0.0065 |
| 6.00       | 6508      | 1124     | 79.9         | 0.17271051  | 20.08262 | -5.294195   | 0.0050 |
| 7.00       | 6747      | 998      | 82.8         | 0.147917593 | 17.19972 | -5.44915653 | 0.0043 |
| 8.00       | 5932      | 747      | 85.4         | 0.125927175 | 14.64269 | -5.61010808 | 0.0037 |
| 9.00       | 6246      | 690      | 87.2         | 0.110470701 | 12.84543 | -5.7410615  | 0.0032 |
| 10.00      | 4904      | 435      | 89.7         | 0.0887031   | 10.31431 | -5.96051701 | 0.0026 |

**Table S7** 3 mol% Cp\*2TiCl, 2 mol% TEMPO, 0.025 M substrate **1** in MeCN – Run 1

| Time (min) | Area Ph2O | Area SUB | % Conversion | Asub/AIS    | %SM       | Ln[SM]       | [SM]   |
|------------|-----------|----------|--------------|-------------|-----------|--------------|--------|
| 0.00       | 4621      | 3613     | 2.3          | 0.781865397 | 100       | -3.688879454 | 0.0250 |
| 0.50       | 4944      | 3363     | 15.0         | 0.680218447 | 85.027306 | -3.85107719  | 0.0213 |
| 1.00       | 4725      | 2900     | 23.3         | 0.613756614 | 76.719577 | -3.953892727 | 0.0192 |
| 1.50       | 4813      | 2571     | 33.2         | 0.534178267 | 66.772283 | -4.092761565 | 0.0167 |
| 2.00       | 5626      | 2523     | 43.9         | 0.448453608 | 56.056701 | -4.267685943 | 0.0140 |
| 2.50       | 4936      | 1984     | 49.8         | 0.401944895 | 50.243112 | -4.377176181 | 0.0126 |
| 3.00       | 5766      | 2057     | 55.4         | 0.356746445 | 44.593306 | -4.496465891 | 0.0111 |
| 3.50       | 3771      | 961      | 68.1         | 0.254839565 | 31.854946 | -4.832856991 | 0.0080 |
| 4.00       | 5465      | 1508     | 65.5         | 0.275937786 | 34.492223 | -4.753315755 | 0.0086 |
| 4.50       | 7000      | 1532     | 72.6         | 0.218857143 | 27.357143 | -4.985071981 | 0.0068 |
| 5.00       | 6412      | 1104     | 78.5         | 0.172177168 | 21.522146 | -5.22496719  | 0.0054 |
| 6.00       | 4751      | 622      | 83.6         | 0.130919806 | 16.364976 | -5.498906211 | 0.0041 |
| 7.00       | 5496      | 675      | 84.6         | 0.122816594 | 15.352074 | -5.562799046 | 0.0038 |
| 8.00       | 6151      | 620      | 87.4         | 0.100796618 | 12.599577 | -5.760386374 | 0.0031 |
| 9.00       | 4548      | 284      | 92.2         | 0.062445031 | 7.8056288 | -6.23920452  | 0.0020 |
| 10.00      | 5007      | 374      | 90.7         | 0.074695426 | 9.3369283 | -6.060072318 | 0.0023 |

**Table S8** 3 mol% Cp\*2TiCl, 2 mol% TEMPO, 0.025 M substrate **1** in MeCN – Run 2

| (min) | Area Ph2O | Area SUB | % Conversion | Asub/AIS    | %SM        | Ln[SM]       | [SM]   |
|-------|-----------|----------|--------------|-------------|------------|--------------|--------|
| 0.00  | 5999      | 4881     | -1.7         | 0.813635606 | 100        | -3.688879454 | 0.0250 |
| 0.50  | 5945      | 4100     | 13.8         | 0.689655172 | 86.2068966 | -3.837299459 | 0.0216 |
| 1.00  | 4727      | 2849     | 24.7         | 0.602707849 | 75.3384811 | -3.972058599 | 0.0188 |
| 1.50  | 5620      | 2693     | 40.1         | 0.479181495 | 59.8976868 | -4.201411753 | 0.0150 |
| 2.00  | 6300      | 2642     | 47.6         | 0.419365079 | 52.4206349 | -4.33474933  | 0.0131 |
| 2.50  | 3687      | 864      | 70.7         | 0.234336859 | 29.2921074 | -4.916731532 | 0.0073 |
| 3.00  | 4218      | 796      | 76.4         | 0.188715031 | 23.5893789 | -5.133253078 | 0.0059 |
| 3.50  | 5524      | 1019     | 76.9         | 0.184467777 | 23.0584721 | -5.156016384 | 0.0058 |
| 4.00  | 5430      | 872      | 79.9         | 0.160589319 | 20.0736648 | -5.294640892 | 0.0050 |
| 4.50  | 6312      | 854      | 83.1         | 0.135297845 | 16.9122307 | -5.466012572 | 0.0042 |
| 5.00  | 4327      | 422      | 87.8         | 0.097527155 | 12.1908944 | -5.793360329 | 0.0030 |
| 6.00  | 7032      | 630      | 88.8         | 0.089590444 | 11.1988055 | -5.878242523 | 0.0028 |
| 7.00  | 6269      | 422      | 91.6         | 0.067315361 | 8.41442016 | -6.16410272  | 0.0021 |
| 8.00  | 5541      | 328      | 92.6         | 0.059195091 | 7.39938639 | -6.292652563 | 0.0018 |
| 9.00  | 5646      | 292      | 93.5         | 0.05171803  | 6.46475381 | -6.427684709 | 0.0016 |
| 10.00 | 6448      | 308      | 94.0         | 0.047766749 | 5.97084367 | -6.507161404 | 0.0015 |

**Table S9** 3 mol% Cp\*<sub>2</sub>TiCl<sub>4</sub>, 2 mol% TEMPO, 0.025 M substrate **1** in MeCN – Run 3



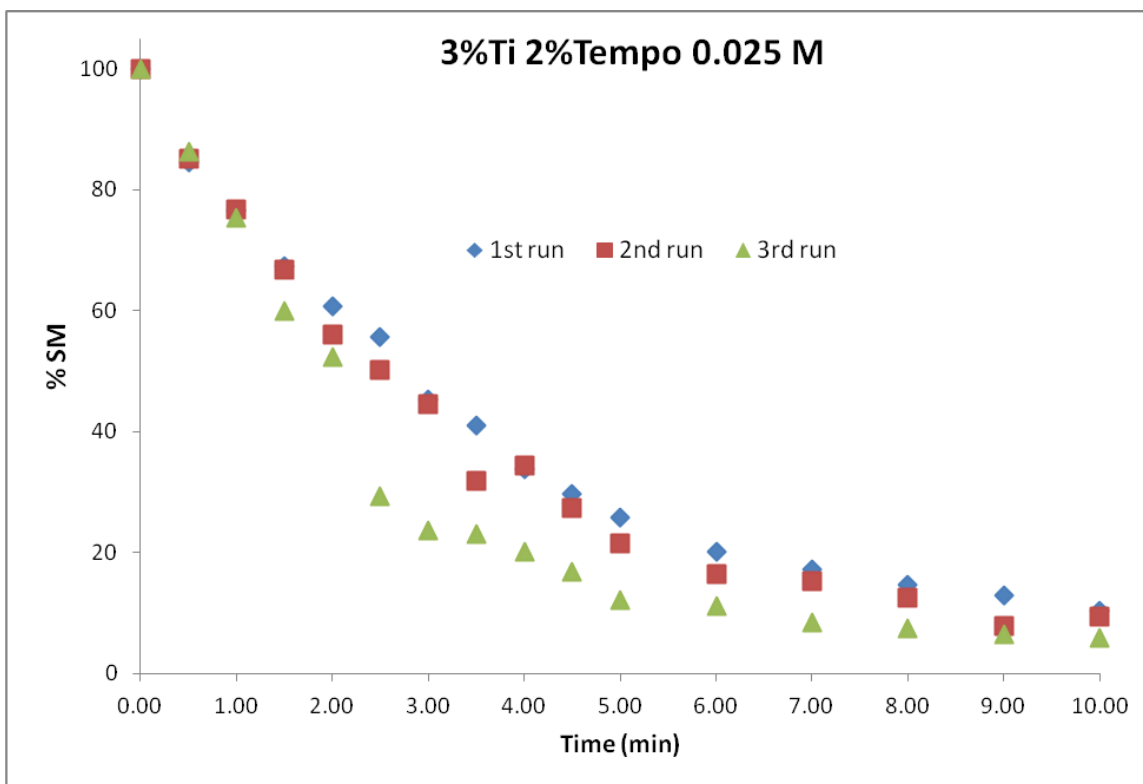

**Figure S5** Overlay of 3 kinetics experiments with 3 mol% Cp\*2TiCl<sub>4</sub>, 2 mol% TEMPO, 0.025 M substrate **1** in MeCN

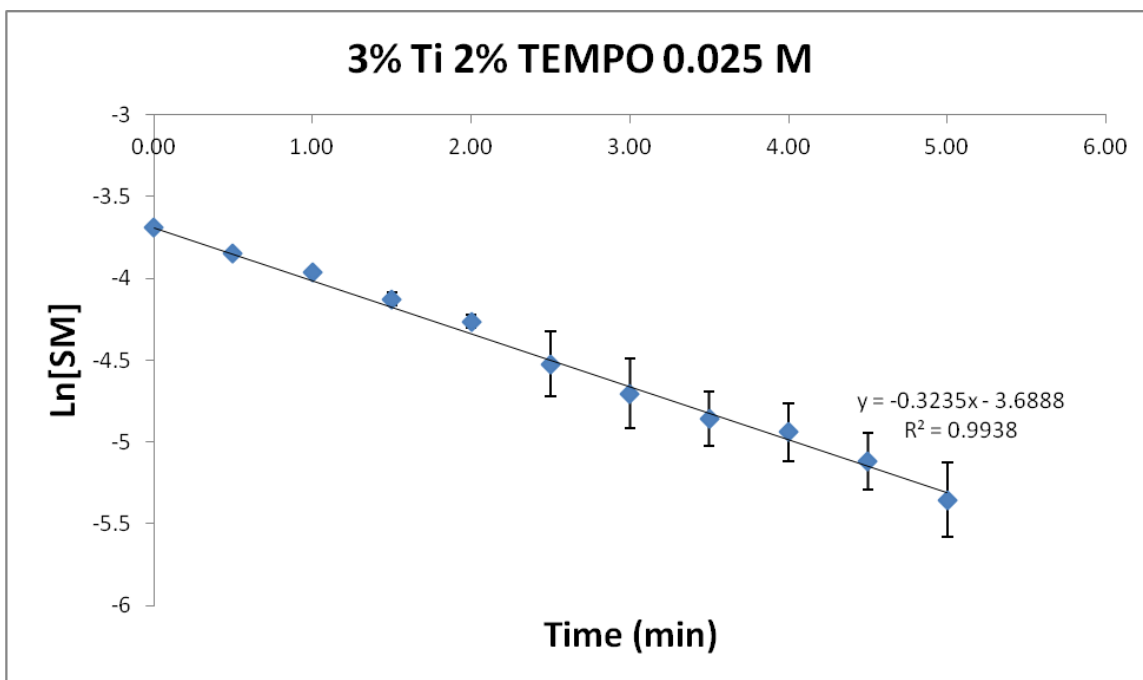

**Figure S6** Graph of Ln[SM] vs time for average of 3 kinetic runs with 3 mol% Cp\*2TiCl, 2 mol% TEMPO, 0.025 M substrate **1** in MeCN. Error bars calculated using standard error of the mean (standard deviation / sqrt(n))

| Time (min) | Area Ph2O | Area SUB | % Conversion | Asub/AIS    | %SM      | Ln[SM]      | [SM]   |
|------------|-----------|----------|--------------|-------------|----------|-------------|--------|
| 0.00       | 5399      | 3807     | 0.0          | 0.70513058  | 100      | -3.68887945 | 0.0250 |
| 0.50       | 6413      | 4022     | 11.1         | 0.627163574 | 88.9429  | -3.80605507 | 0.0222 |
| 1.00       | 5873      | 3300     | 20.3         | 0.561893411 | 79.68643 | -3.91595029 | 0.0199 |
| 1.50       | 6051      | 3080     | 27.8         | 0.509006776 | 72.18617 | -4.01480113 | 0.0180 |
| 2.00       | 7675      | 3653     | 32.5         | 0.475960912 | 67.49968 | -4.08192673 | 0.0169 |
| 2.50       | 8388      | 3729     | 37.0         | 0.444563662 | 63.047   | -4.15016919 | 0.0158 |
| 3.00       | 8542      | 3168     | 47.4         | 0.370873332 | 52.5964  | -4.33140188 | 0.0131 |
| 3.50       | 7410      | 2395     | 54.2         | 0.323211876 | 45.83717 | -4.46895439 | 0.0115 |
| 4.00       | 8134      | 2269     | 60.4         | 0.278952545 | 39.56041 | -4.61622078 | 0.0099 |
| 4.50       | 7574      | 1756     | 67.1         | 0.231845788 | 32.87984 | -4.80119001 | 0.0082 |
| 5.00       | 7589      | 1512     | 71.7         | 0.199235736 | 28.25515 | -4.95277373 | 0.0071 |
| 6.00       | 8018      | 1328     | 76.5         | 0.165627338 | 23.48889 | -5.13752214 | 0.0059 |
| 7.00       | 9335      | 1396     | 78.8         | 0.149544724 | 21.20809 | -5.23966695 | 0.0053 |
| 8.00       | 8366      | 1009     | 82.9         | 0.12060722  | 17.10424 | -5.45472331 | 0.0043 |
| 9.00       | 7872      | 764      | 86.2         | 0.097052846 | 13.76381 | -5.67200683 | 0.0034 |
| 10.00      | 7763      | 699      | 87.2         | 0.090042509 | 12.76962 | -5.74698057 | 0.0032 |

**Table S10** 2 mol% Cp\*2TiCl, 2% TEMPO 0.025 M Substrate 1 in MeCN – Run 1

| Time (min) | Area Ph2O | Area SUB | % Conversion | Asub/AIS    | %SM       | Ln[SM]       | [SM]   |
|------------|-----------|----------|--------------|-------------|-----------|--------------|--------|
| 0.00       | 3883      | 3289     | 0.3          | 0.847025496 | 100       | -3.688879454 | 0.0250 |
| 0.50       | 7609      | 5703     | 11.8         | 0.749507163 | 88.177313 | -3.81469993  | 0.0220 |
| 1.00       | 6268      | 4106     | 22.9         | 0.655073389 | 77.067457 | -3.949368531 | 0.0193 |
| 1.50       | 6808      | 3933     | 32.0         | 0.577702703 | 67.965024 | -4.075056422 | 0.0170 |
| 2.00       | 7919      | 4666     | 30.7         | 0.58921581  | 69.319507 | -4.055323286 | 0.0173 |
| 2.50       | 8237      | 4234     | 39.5         | 0.514022095 | 60.473188 | -4.191849552 | 0.0151 |
| 3.00       | 6728      | 2529     | 55.8         | 0.375891795 | 44.222564 | -4.504814448 | 0.0111 |
| 3.50       | 7596      | 2592     | 59.9         | 0.341232227 | 40.144968 | -4.601552539 | 0.0100 |
| 4.00       | 7437      | 2151     | 66.0         | 0.289229528 | 34.027003 | -4.766895216 | 0.0085 |
| 4.50       | 8186      | 2426     | 65.1         | 0.296359638 | 34.86584  | -4.742542092 | 0.0087 |
| 5.00       | 7257      | 1680     | 72.8         | 0.23150062  | 27.235367 | -4.989533251 | 0.0068 |
| 6.00       | 7075      | 1296     | 78.4         | 0.183180212 | 21.550613 | -5.22364537  | 0.0054 |
| 7.00       | 7141      | 1051     | 82.7         | 0.147178266 | 17.31509  | -5.442471255 | 0.0043 |
| 8.00       | 7580      | 991      | 84.6         | 0.130738786 | 15.381034 | -5.560914469 | 0.0038 |
| 9.00       | 8231      | 995      | 85.8         | 0.120884461 | 14.221701 | -5.63928058  | 0.0036 |
| 10.00      | 6954      | 617      | 89.6         | 0.088725913 | 10.438343 | -5.948563813 | 0.0026 |

**Table S11** 2 mol% Cp\*2TiCl, 2% TEMPO 0.025 M Substrate 1 in MeCN – Run 2

| Time (min) | Area Ph2O | Area SUB | % Conversion | Asub/AIS    | %SM        | Ln[SM]       | [SM]   |
|------------|-----------|----------|--------------|-------------|------------|--------------|--------|
| 0.00       | 5632      | 4206     | -0.9         | 0.746803977 | 100        | -3.688879454 | 0.0250 |
| 0.50       | 4790      | 3100     | 12.5         | 0.647181628 | 87.4569768 | -3.822902661 | 0.0219 |
| 1.00       | 5818      | 3582     | 16.8         | 0.61567549  | 83.1993905 | -3.872809618 | 0.0208 |
| 1.50       | 7300      | 4000     | 26.0         | 0.547945205 | 74.0466494 | -3.989354348 | 0.0185 |
| 2.00       | 6920      | 3641     | 28.9         | 0.526156069 | 71.1021715 | -4.029931762 | 0.0178 |
| 2.50       | 5409      | 2492     | 37.7         | 0.460713625 | 62.258598  | -4.162752993 | 0.0156 |
| 3.00       | 6563      | 2403     | 50.5         | 0.366143532 | 49.4788557 | -4.39250422  | 0.0124 |
| 3.50       | 7262      | 2559     | 52.4         | 0.352382264 | 47.6192248 | -4.430813077 | 0.0119 |
| 4.00       | 8158      | 2780     | 54.0         | 0.340769797 | 46.0499725 | -4.464322475 | 0.0115 |
| 4.50       | 4729      | 959      | 72.6         | 0.202791288 | 27.4042281 | -4.983352329 | 0.0069 |
| 5.00       | 6558      | 1304     | 73.1         | 0.19884111  | 26.8704203 | -5.003023576 | 0.0067 |
| 6.00       | 7142      | 1048     | 80.2         | 0.146737609 | 19.8294066 | -5.306883625 | 0.0050 |
| 7.00       | 6318      | 660      | 85.9         | 0.104463438 | 14.1166808 | -5.646692508 | 0.0035 |
| 8.00       | 5323      | 459      | 88.3         | 0.08622957  | 11.6526446 | -5.838516484 | 0.0029 |
| 9.00       | 7556      | 762      | 86.4         | 0.100847009 | 13.6279742 | -5.681925034 | 0.0034 |
| 10.00      | 7056      | 564      | 89.2         | 0.079931973 | 10.8016179 | -5.914353708 | 0.0027 |

**Table S12** 2 mol% Cp\*2TiCl, 2% TEMPO 0.025 M Substrate 1 in MeCN – Run 3

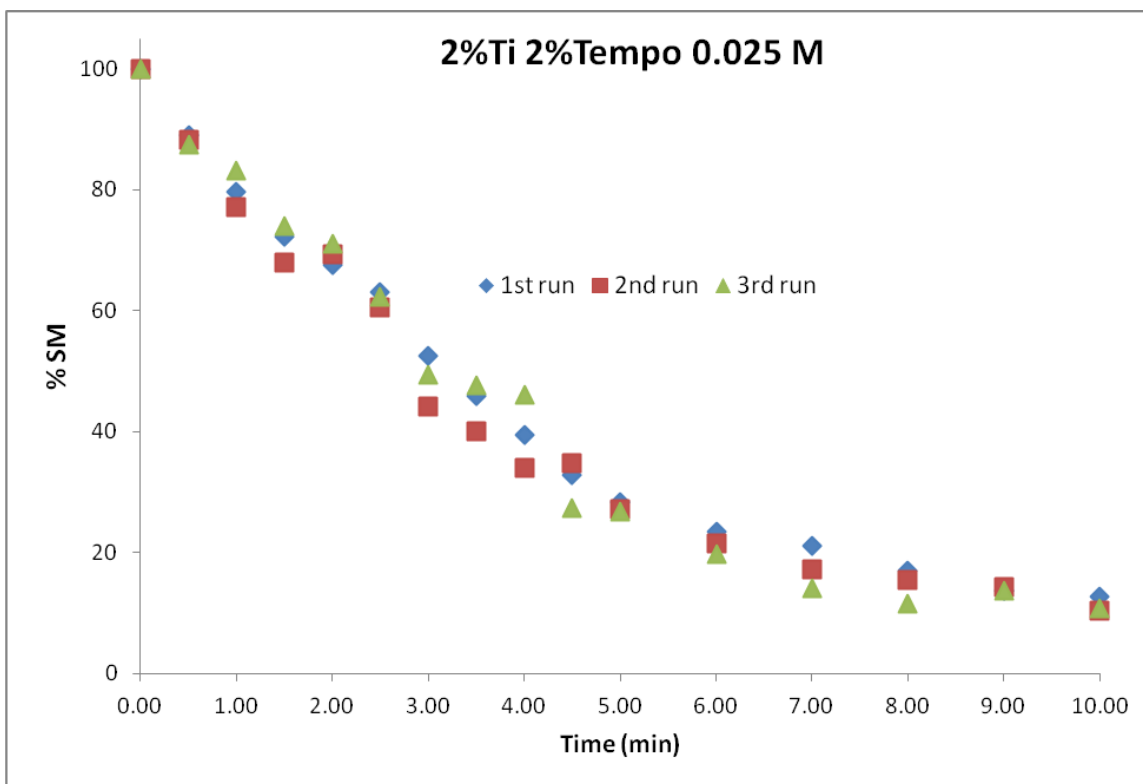

**Figure S7** Overlay of 3 kinetics experiments with 2 mol% Cp\*<sub>2</sub>TiCl<sub>2</sub>, 2 mol% TEMPO, 0.025 M substrate **1** in MeCN

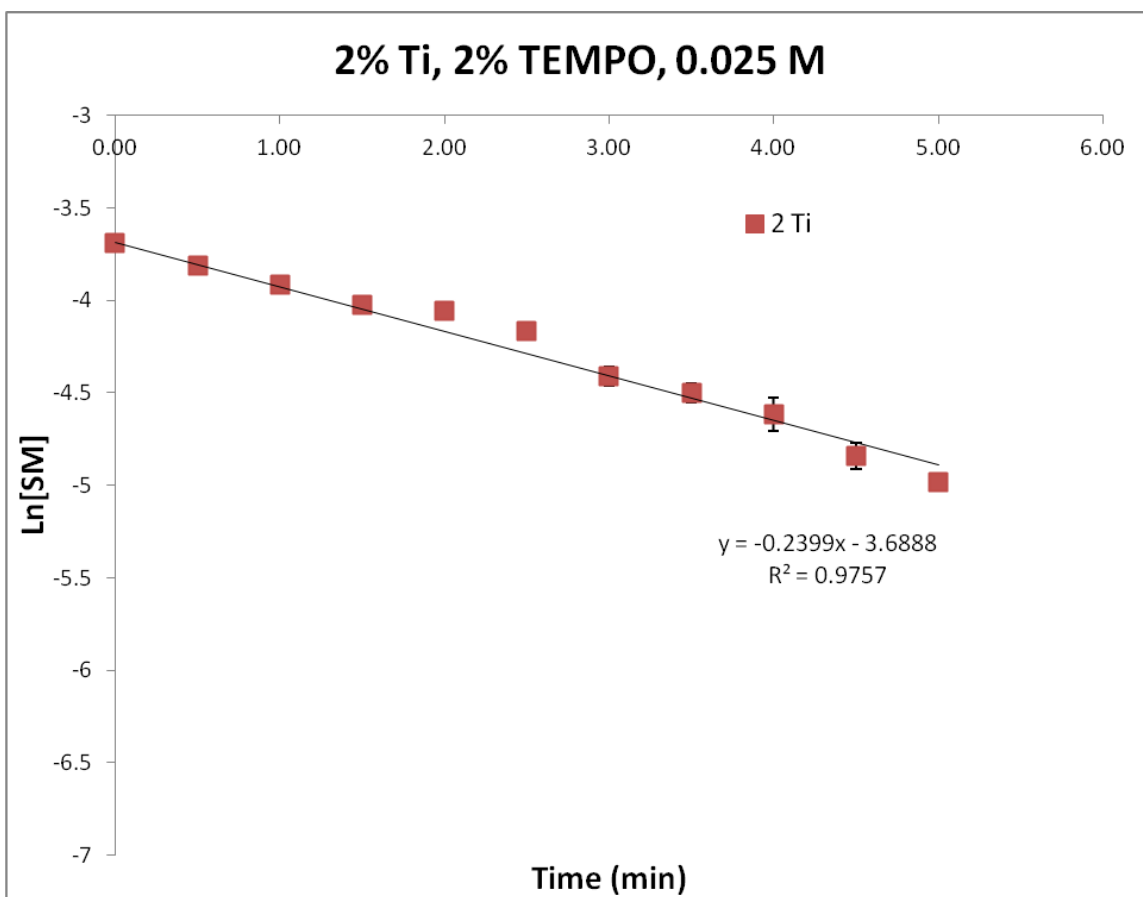

**Figure S8** Graph of Ln[SM] vs time for average of 3 kinetic runs with 2 mol% Cp\*2TiCl, 2 mol% TEMPO, 0.025 M substrate **1** in MeCN. Error bars calculated using standard error of the mean (standard deviation / sqrt(n))

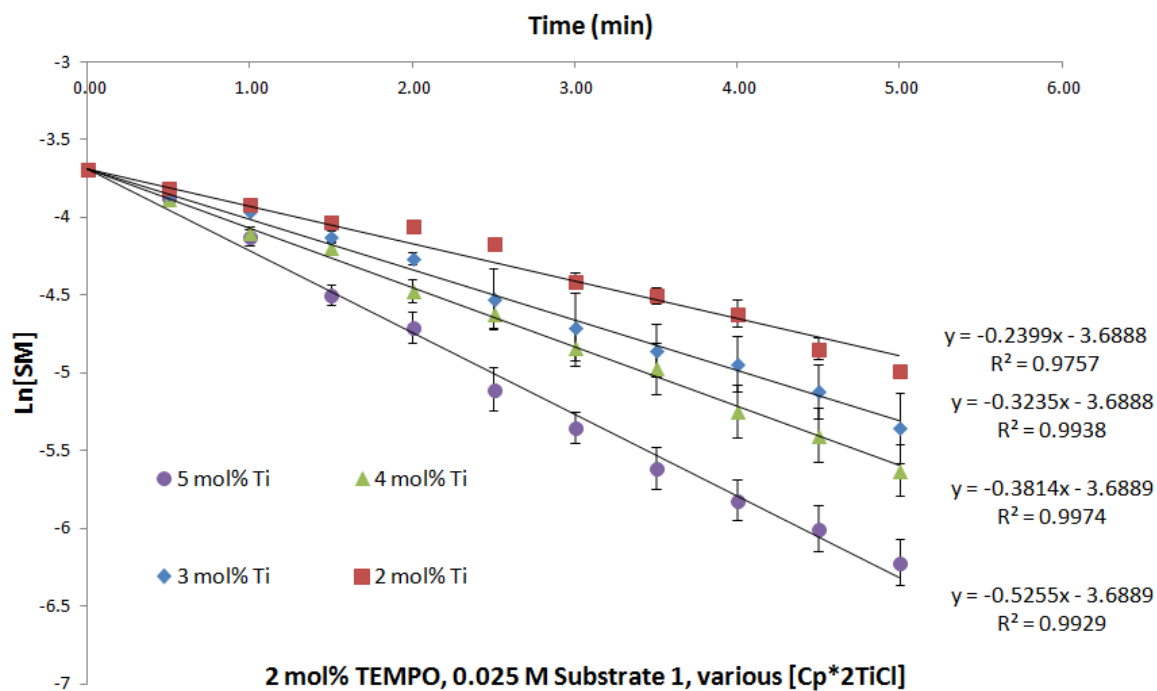

**Figure S9** Graph of Ln[SM] vs time. Each dataset is the average of 3 runs (shown above). Experiments were run with 2 mol% TEMPO, 0.025 M substrate **1**, and varying mol% Cp\*2TiCl from 2 mol% to 5 mol%. Experiments were run in MeCN at 23 °C. Error bars were calculated using standard error (standard deviation / square root (n))



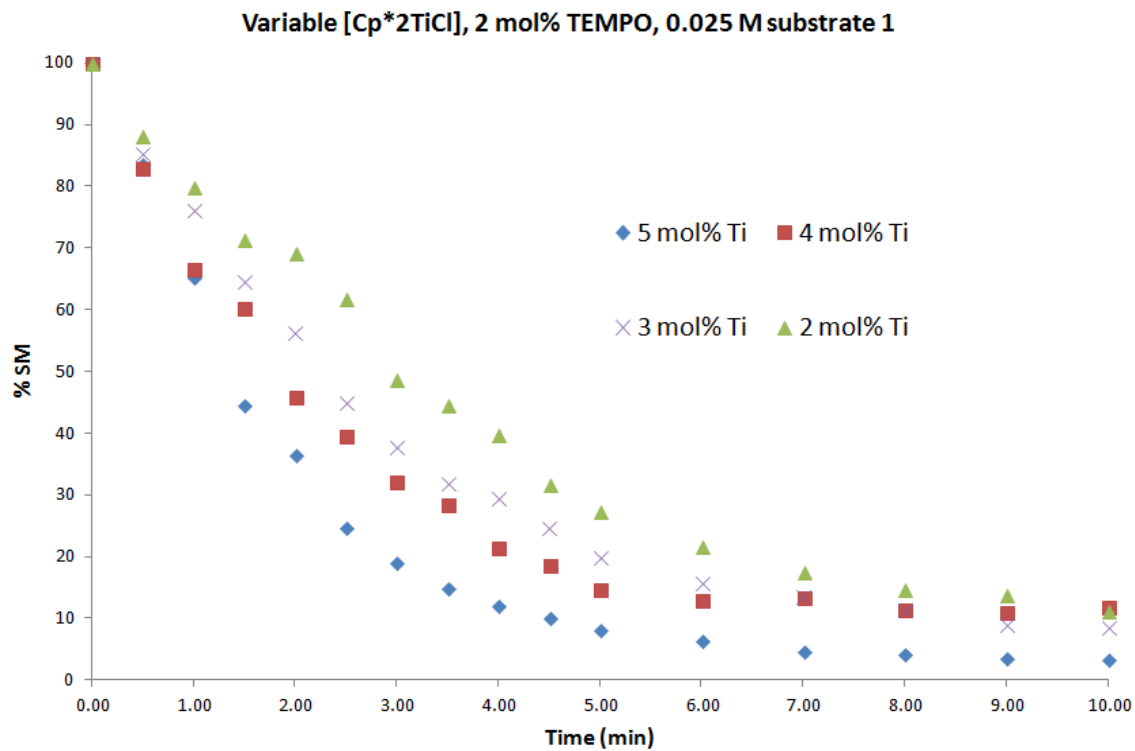

**Figure S10** Graph of %SM vs time. Each dataset is an average of 3 kinetic experiments using 2 mol% TEMPO, 0.025 M substrate **1** in MeCN at 23 °C. Mol% of Cp\*2TiCl was varied in each dataset from 2 mol% to 5 mol%.

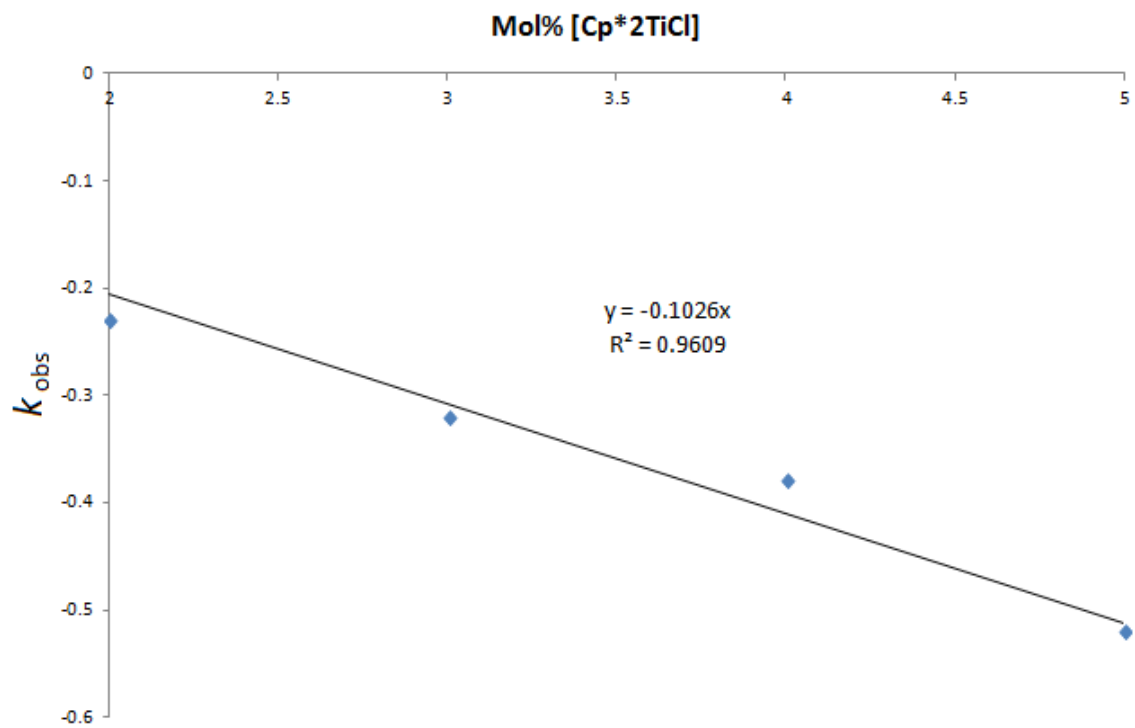

**Figure S11** Graph of  $k_{obs}$  vs mol%  $Cp^*2TiCl$ . Experiments were all run with 2 mol% TEMPO and 0.025 M substrate **1** in MeCN at 23 °C.  $k_{obs}$  was calculated from the slope of  $\ln[SM]$  vs time plots. Each data point is the average of 3 experiments.

| Time (min) | Area Ph2O | Area SUB | % Conversion | Asub/AIS   | %SM      | Ln[SM]      | [SM]   |
|------------|-----------|----------|--------------|------------|----------|-------------|--------|
| 0.00       | 5399      | 3807     | 0.0          | 0.70513058 | 100      | -3.68887945 | 0.0250 |
| 0.50       | 6413      | 4022     | 11.1         | 0.62716357 | 88.9429  | -3.80605507 | 0.0222 |
| 1.00       | 5873      | 3300     | 20.3         | 0.56189341 | 79.68643 | -3.91595029 | 0.0199 |
| 1.50       | 6051      | 3080     | 27.8         | 0.50900678 | 72.18617 | -4.01480113 | 0.0180 |
| 2.00       | 7675      | 3653     | 32.5         | 0.47596091 | 67.49968 | -4.08192673 | 0.0169 |
| 2.50       | 8388      | 3729     | 37.0         | 0.44456366 | 63.047   | -4.15016919 | 0.0158 |
| 3.00       | 8542      | 3168     | 47.4         | 0.37087333 | 52.5964  | -4.33140188 | 0.0131 |
| 3.50       | 7410      | 2395     | 54.2         | 0.32321188 | 45.83717 | -4.46895439 | 0.0115 |
| 4.00       | 8134      | 2269     | 60.4         | 0.27895254 | 39.56041 | -4.61622078 | 0.0099 |
| 4.50       | 7574      | 1756     | 67.1         | 0.23184579 | 32.87984 | -4.80119001 | 0.0082 |
| 5.00       | 7589      | 1512     | 71.7         | 0.19923574 | 28.25515 | -4.95277373 | 0.0071 |
| 6.00       | 8018      | 1328     | 76.5         | 0.16562734 | 23.48889 | -5.13752214 | 0.0059 |
| 7.00       | 9335      | 1396     | 78.8         | 0.14954472 | 21.20809 | -5.23966695 | 0.0053 |
| 8.00       | 8366      | 1009     | 82.9         | 0.12060722 | 17.10424 | -5.45472331 | 0.0043 |
| 9.00       | 7872      | 764      | 86.2         | 0.09705285 | 13.76381 | -5.67200683 | 0.0034 |
| 10.00      | 7763      | 699      | 87.2         | 0.09004251 | 12.76962 | -5.74698057 | 0.0032 |

**Table S13** 2 mol% Cp\*2TiCl, 2% TEMPO 0.025 M Substrate **1** in MeCN – Run 1

| Time (min) | Area Ph2O | Area SUB | % Conversion | Asub/AIS   | %SM      | Ln[SM]    | [SM]   |
|------------|-----------|----------|--------------|------------|----------|-----------|--------|
| 0.00       | 3883      | 3312     | -0.3         | 0.94514551 | 100      | -3.688879 | 0.0250 |
| 0.50       | 7609      | 5703     | 11.8         | 0.74950716 | 88.17731 | -3.8147   | 0.0220 |
| 1.00       | 6268      | 4106     | 22.9         | 0.65507339 | 77.06746 | -3.949369 | 0.0193 |
| 1.50       | 6808      | 3933     | 32.0         | 0.5777027  | 67.96502 | -4.075056 | 0.0170 |
| 2.00       | 7919      | 4666     | 30.7         | 0.58921581 | 69.31951 | -4.055323 | 0.0173 |
| 2.50       | 8237      | 4234     | 39.5         | 0.5140221  | 60.47319 | -4.19185  | 0.0151 |
| 3.00       | 6728      | 2529     | 55.8         | 0.3758918  | 44.22256 | -4.504814 | 0.0111 |
| 3.50       | 7596      | 2910     | 54.9         | 0.38309637 | 45.07016 | -4.485829 | 0.0113 |
| 4.00       | 7437      | 2612     | 58.7         | 0.35121689 | 41.31963 | -4.572712 | 0.0103 |
| 4.50       | 8186      | 2910     | 58.2         | 0.35548497 | 41.82176 | -4.560633 | 0.0105 |
| 5.00       | 7257      | 2100     | 66.0         | 0.28937578 | 34.04421 | -4.76639  | 0.0085 |
| 6.00       | 7075      | 1296     | 78.4         | 0.18318021 | 21.55061 | -5.223645 | 0.0054 |
| 7.00       | 7141      | 1051     | 82.7         | 0.14717827 | 17.31509 | -5.442471 | 0.0043 |
| 8.00       | 7580      | 991      | 84.6         | 0.13073879 | 15.38103 | -5.560914 | 0.0038 |
| 9.00       | 8231      | 995      | 85.8         | 0.12088446 | 14.2217  | -5.639281 | 0.0036 |
| 10.00      | 6954      | 617      | 89.6         | 0.08872591 | 10.43834 | -5.948564 | 0.0026 |

**Table S14** 2 mol% Cp\*2TiCl, 2% TEMPO 0.025 M Substrate **1** in MeCN – Run 2

| Time (min) | Area Ph2O | Area SUB | % Conversion | Asub/AIS   | %SM      | Ln[SM]    | [SM]   |
|------------|-----------|----------|--------------|------------|----------|-----------|--------|
| 0.00       | 5231      | 3912     | -1.1         | 0.74784936 | 100      | -3.688879 | 0.0250 |
| 0.50       | 4790      | 3100     | 12.5         | 0.64718163 | 87.45698 | -3.822903 | 0.0219 |
| 1.00       | 5818      | 3582     | 16.8         | 0.61567549 | 83.19939 | -3.87281  | 0.0208 |
| 1.50       | 7300      | 4000     | 26.0         | 0.54794521 | 74.04665 | -3.989354 | 0.0185 |
| 2.00       | 6920      | 3641     | 28.9         | 0.52615607 | 71.10217 | -4.029932 | 0.0178 |
| 2.50       | 5409      | 2492     | 37.7         | 0.46071363 | 62.2586  | -4.162753 | 0.0156 |
| 3.00       | 6563      | 2710     | 44.2         | 0.41292092 | 55.80012 | -4.272274 | 0.0140 |
| 3.50       | 7262      | 2832     | 47.3         | 0.38997521 | 52.69935 | -4.329446 | 0.0132 |
| 4.00       | 8158      | 2930     | 51.5         | 0.35915666 | 48.53468 | -4.411771 | 0.0121 |
| 4.50       | 4729      | 1210     | 65.4         | 0.25586805 | 34.57676 | -4.750868 | 0.0086 |
| 5.00       | 6558      | 1810     | 62.7         | 0.27599878 | 37.29713 | -4.675133 | 0.0093 |
| 6.00       | 7142      | 1048     | 80.2         | 0.14673761 | 19.82941 | -5.306884 | 0.0050 |
| 7.00       | 6318      | 660      | 85.9         | 0.10446344 | 14.11668 | -5.646693 | 0.0035 |
| 8.00       | 5323      | 459      | 88.3         | 0.08622957 | 11.65264 | -5.838516 | 0.0029 |
| 9.00       | 7556      | 762      | 86.4         | 0.10084701 | 13.62797 | -5.681925 | 0.0034 |
| 10.00      | 7056      | 564      | 89.2         | 0.07993197 | 10.80162 | -5.914354 | 0.0027 |

**Table S15** 2 mol% Cp\*2TiCl<sub>4</sub>, 2% TEMPO 0.025 M Substrate **1** in MeCN – Run 3

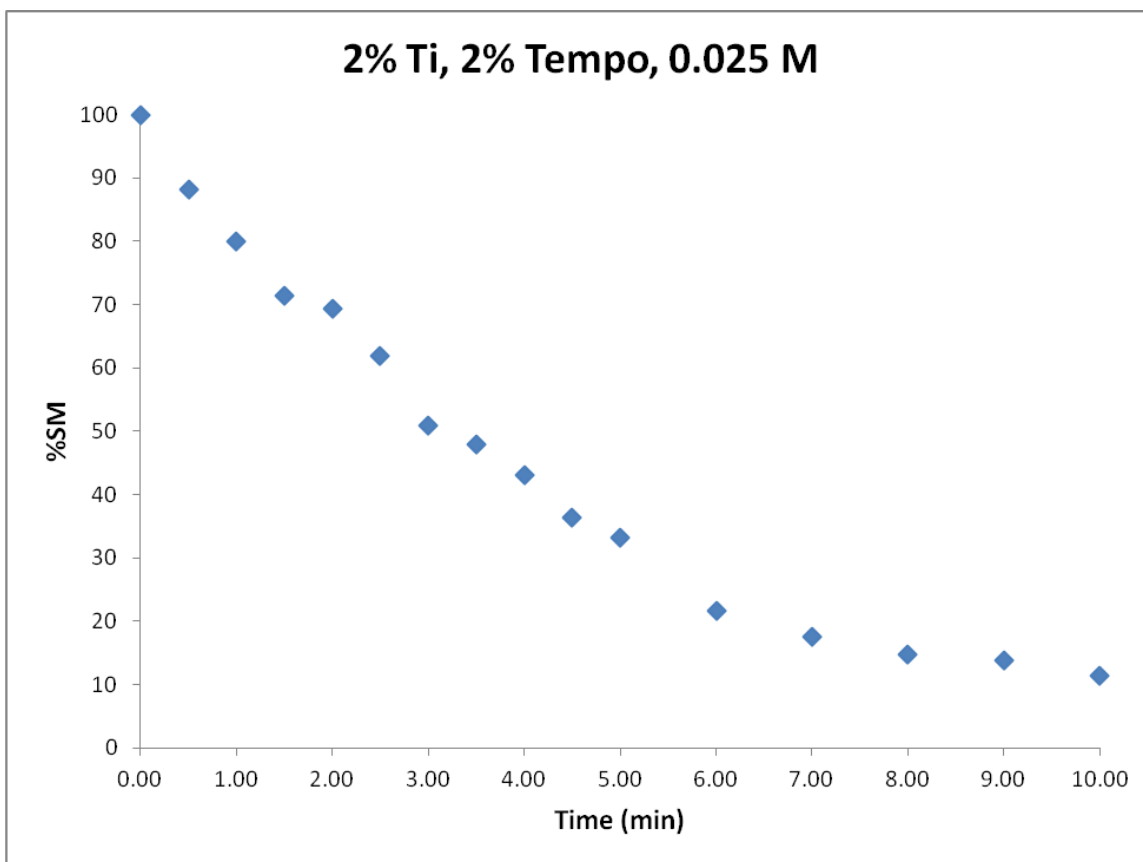

**Figure S12** Average of 3 kinetics experiments with 2 mol% Cp\*2TiCl, 2 mol% TEMPO, 0.025 M substrate **1** in MeCN

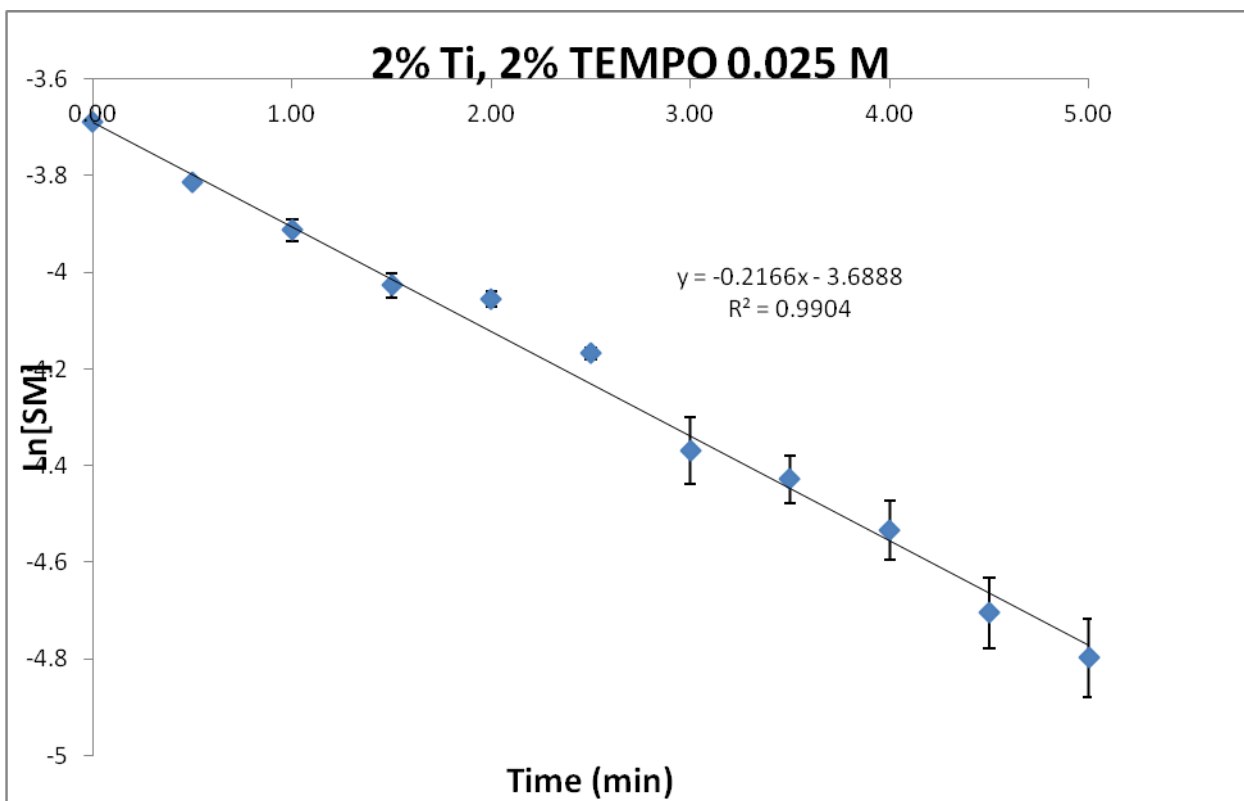

**Figure S13** Graph of Ln[SM] vs time for average of 3 kinetic runs with 2 mol% Cp\*<sub>2</sub>TiCl, 2 mol% TEMPO, 0.025 M substrate **1** in MeCN. Error bars calculated using standard error of the mean (standard deviation / sqrt(n))

| Time (min) | Area Ph2O | Area SUB | % Conversion | Asub/AIS   | %SM      | Ln[SM]      | [SM]   |
|------------|-----------|----------|--------------|------------|----------|-------------|--------|
| 0.00       | 4997      | 4513     | 2.9          | 0.90314189 | 100      | -3.68887945 | 0.0250 |
| 0.50       | 5725      | 4613     | 19.4         | 0.80576419 | 80.57642 | -3.9048436  | 0.0201 |
| 1.00       | 6301      | 4400     | 30.2         | 0.69830186 | 69.83019 | -4.04798326 | 0.0175 |
| 1.50       | 5899      | 3612     | 38.8         | 0.61230717 | 61.23072 | -4.17940066 | 0.0153 |
| 2.00       | 6090      | 2990     | 50.9         | 0.4909688  | 49.09688 | -4.40025415 | 0.0123 |
| 2.50       | 6531      | 2388     | 63.4         | 0.36564079 | 36.56408 | -4.69498333 | 0.0091 |
| 3.00       | 6125      | 1725     | 71.8         | 0.28163265 | 28.16327 | -4.95603116 | 0.0070 |
| 3.50       | 5675      | 1304     | 77.0         | 0.22977974 | 22.97797 | -5.15951355 | 0.0057 |
| 4.00       | 5948      | 1151     | 80.6         | 0.19351042 | 19.35104 | -5.33130335 | 0.0048 |
| 4.50       | 5405      | 823      | 84.8         | 0.15226642 | 15.22664 | -5.57100298 | 0.0038 |
| 5.00       | 7105      | 1044     | 85.3         | 0.14693878 | 14.69388 | -5.60661873 | 0.0037 |
| 6.00       | 6155      | 614      | 90.0         | 0.0997563  | 9.97563  | -5.99390456 | 0.0025 |
| 7.00       | 5087      | 323      | 93.7         | 0.06349518 | 6.349518 | -6.44567068 | 0.0016 |
| 8.00       | 5524      | 340      | 93.8         | 0.0615496  | 6.15496  | -6.47679135 | 0.0015 |
| 9.00       | 5978      | 344      | 94.2         | 0.05754433 | 5.754433 | -6.54407914 | 0.0014 |
| 10.00      | 6820      | 361      | 94.7         | 0.05293255 | 5.293255 | -6.62761625 | 0.0013 |

**Table S16** 2 mol% Cp\*2TiCl, 3% TEMPO 0.025 M Substrate **1** in MeCN – Run 1



| Time (min) | Area Ph2O | Area SUB | % Conversion | Asub/AIS   | %SM      | Ln[SM]    | [SM]   |
|------------|-----------|----------|--------------|------------|----------|-----------|--------|
| 0.00       | 3952      | 4210     | 3.2          | 1.0652834  | 100      | -3.688879 | 0.0250 |
| 0.50       | 4405      | 3815     | 21.3         | 0.86606129 | 78.73284 | -3.927989 | 0.0197 |
| 1.00       | 5796      | 4686     | 26.5         | 0.80848861 | 73.49896 | -3.996778 | 0.0184 |
| 1.50       | 5461      | 3945     | 34.3         | 0.72239517 | 65.67229 | -4.109373 | 0.0164 |
| 2.00       | 6732      | 3812     | 48.5         | 0.56625074 | 51.47734 | -4.352908 | 0.0129 |
| 2.50       | 5220      | 2300     | 59.9         | 0.44061303 | 40.05573 | -4.603778 | 0.0100 |
| 3.00       | 4897      | 1987     | 63.1         | 0.40575863 | 36.88715 | -4.686186 | 0.0092 |
| 3.50       | 4973      | 1566     | 71.4         | 0.31490046 | 28.62731 | -4.939688 | 0.0072 |
| 4.00       | 5503      | 1415     | 76.6         | 0.25713247 | 23.37568 | -5.142354 | 0.0058 |
| 4.50       | 5146      | 1224     | 78.4         | 0.23785464 | 21.62315 | -5.220285 | 0.0054 |
| 5.00       | 5357      | 1078     | 81.7         | 0.20123203 | 18.29382 | -5.387486 | 0.0046 |
| 6.00       | 5706      | 941      | 85.0         | 0.16491413 | 14.99219 | -5.58652  | 0.0037 |
| 7.00       | 6048      | 865      | 87.0         | 0.14302249 | 13.00204 | -5.728943 | 0.0033 |
| 8.00       | 5214      | 538      | 90.6         | 0.10318374 | 9.38034  | -6.055434 | 0.0023 |
| 9.00       | 6758      | 642      | 91.4         | 0.09499852 | 8.636229 | -6.138084 | 0.0022 |
| 10.00      | 5321      | 427      | 92.7         | 0.08024807 | 7.295279 | -6.306822 | 0.0018 |

**Table S17** 2 mol% Cp\*2TiCl, 3% TEMPO 0.025 M Substrate **1** in MeCN – Run 2

| Time (min) | Area Ph2O | Area SUB | % Conversion | Asub/AIS   | %SM      | Ln[SM]    | [SM]   |
|------------|-----------|----------|--------------|------------|----------|-----------|--------|
| 0.00       | 5441      | 5791     | 3.2          | 1.06432641 | 100      | -3.688879 | 0.0250 |
| 0.50       | 6232      | 5412     | 21.1         | 0.86842105 | 78.94737 | -3.925268 | 0.0197 |
| 1.00       | 6092      | 4464     | 33.4         | 0.73276428 | 66.61493 | -4.095121 | 0.0167 |
| 1.50       | 6462      | 4345     | 38.9         | 0.67239245 | 61.12659 | -4.181103 | 0.0153 |
| 2.00       | 6501      | 3878     | 45.8         | 0.59652361 | 54.22942 | -4.300826 | 0.0136 |
| 2.50       | 6677      | 3324     | 54.7         | 0.49782837 | 45.25712 | -4.48169  | 0.0113 |
| 3.00       | 5883      | 2337     | 63.9         | 0.3972463  | 36.1133  | -4.707388 | 0.0090 |
| 3.50       | 5709      | 2012     | 68.0         | 0.35242599 | 32.03873 | -4.827104 | 0.0080 |
| 4.00       | 5728      | 1856     | 70.5         | 0.32402235 | 29.45658 | -4.911132 | 0.0074 |
| 4.50       | 6045      | 1755     | 73.6         | 0.29032258 | 26.39296 | -5.020952 | 0.0066 |
| 5.00       | 6734      | 1663     | 77.5         | 0.24695575 | 22.45052 | -5.182736 | 0.0056 |
| 6.00       | 7203      | 1466     | 81.5         | 0.20352631 | 18.50239 | -5.37615  | 0.0046 |
| 7.00       | 6797      | 988      | 86.8         | 0.14535825 | 13.21439 | -5.712744 | 0.0033 |
| 8.00       | 5571      | 617      | 89.9         | 0.11075211 | 10.06837 | -5.98465  | 0.0025 |
| 9.00       | 6940      | 753      | 90.1         | 0.10850144 | 9.863767 | -6.005181 | 0.0025 |
| 10.00      | 6773      | 637      | 91.5         | 0.0940499  | 8.549991 | -6.148119 | 0.0021 |

**Table S18** 2 mol% Cp\*2TiCl, 3% TEMPO 0.025 M Substrate **1** in MeCN – Run 3

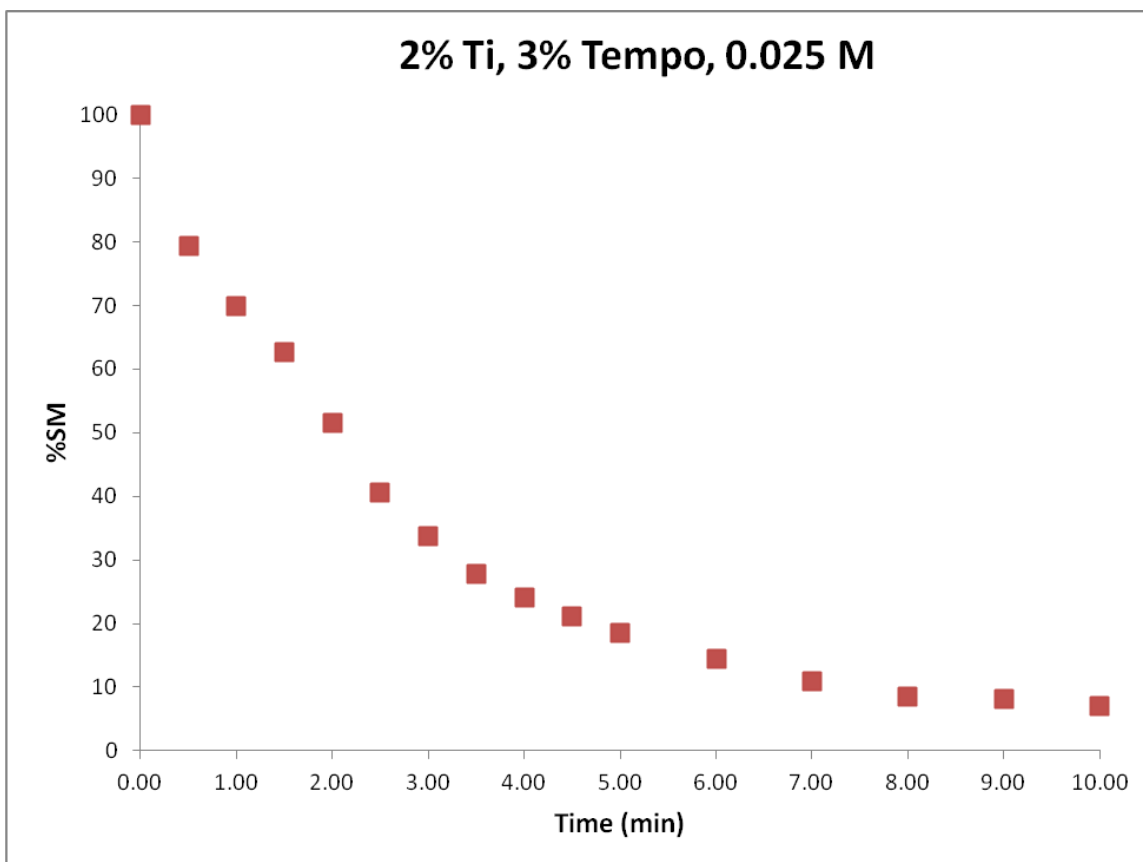

**Figure S14** Overlay of 3 kinetics experiments with 2 mol% Cp\*<sub>2</sub>TiCl, 3 mol% TEMPO, 0.025 M substrate **1** in MeCN

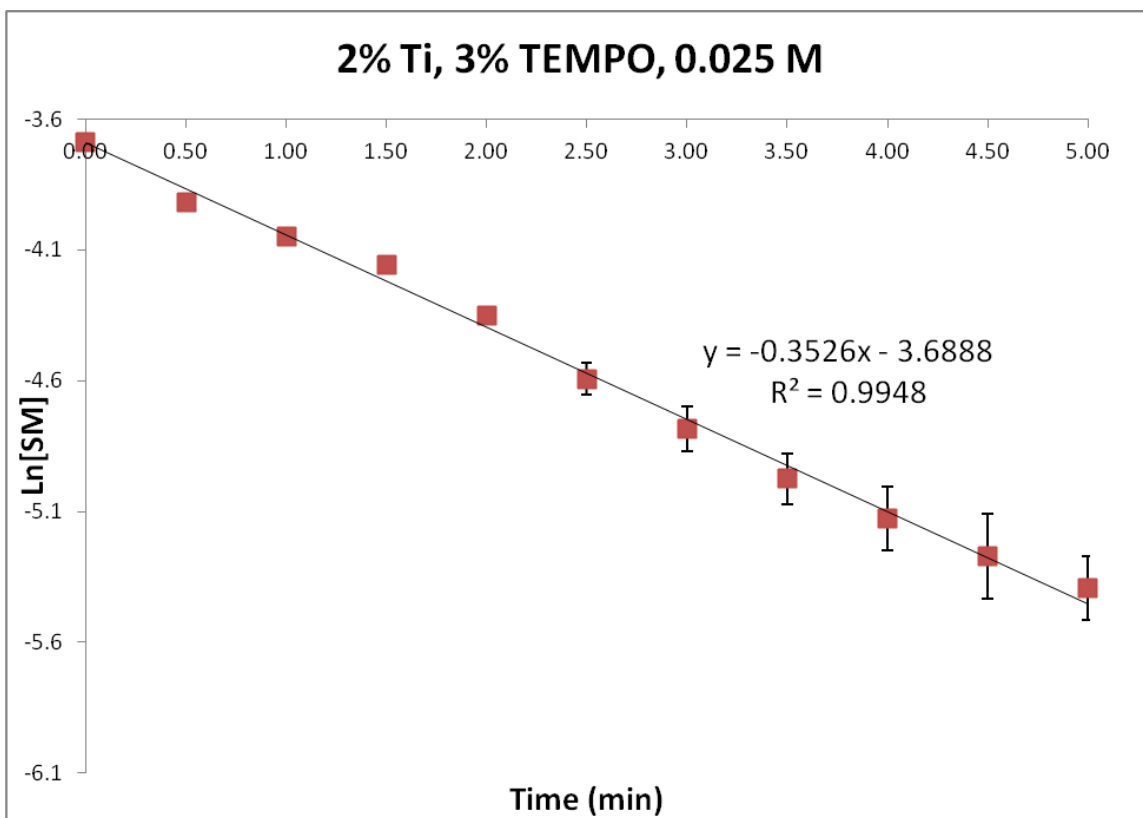

**Figure S15** Graph of Ln[SM] vs time for average of 3 kinetic runs with 2 mol% Cp\*<sub>2</sub>TiCl, 3 mol% TEMPO, 0.025 M substrate **1** in MeCN. Error bars calculated using standard error of the mean (standard deviation / sqrt(n))

| Time (min) | Area Ph2O | Area SUB | % Conversion | Asub/AIS   | %SM      | Ln[SM]      | [SM]   |
|------------|-----------|----------|--------------|------------|----------|-------------|--------|
| 0.00       | 4182      | 3932     | -1.1         | 0.94021999 | 100      | -3.68887945 | 0.0250 |
| 0.50       | 4665      | 3700     | 20.7         | 0.79314041 | 79.31404 | -3.92063447 | 0.0198 |
| 1.00       | 6406      | 4363     | 31.9         | 0.68108024 | 68.10802 | -4.07295461 | 0.0170 |
| 1.50       | 5719      | 3227     | 43.6         | 0.56425949 | 56.42595 | -4.26112051 | 0.0141 |
| 2.00       | 5744      | 2330     | 59.4         | 0.40564067 | 40.56407 | -4.59116702 | 0.0101 |
| 2.50       | 6966      | 2126     | 69.5         | 0.30519667 | 30.51967 | -4.87567835 | 0.0076 |
| 3.00       | 6963      | 1668     | 76.0         | 0.23955192 | 23.95519 | -5.11786457 | 0.0060 |
| 3.50       | 7176      | 1369     | 80.9         | 0.1907748  | 19.07748 | -5.34554103 | 0.0048 |
| 4.00       | 6661      | 938      | 85.9         | 0.1408197  | 14.08197 | -5.64915441 | 0.0035 |
| 4.50       | 5951      | 638      | 89.3         | 0.10720887 | 10.72089 | -5.92185572 | 0.0027 |
| 5.00       | 7301      | 651      | 91.1         | 0.08916587 | 8.916587 | -6.10613642 | 0.0022 |
| 6.00       | 6919      | 431      | 93.8         | 0.06229224 | 6.229224 | -6.46479789 | 0.0016 |
| 7.00       | 6149      | 257      | 95.8         | 0.04179541 | 4.179541 | -6.86384812 | 0.0010 |
| 8.00       | 7070      | 267      | 96.2         | 0.03776521 | 3.776521 | -6.96524655 | 0.0009 |
| 9.00       | 7466      | 244      | 96.7         | 0.03268149 | 3.268149 | -7.10982589 | 0.0008 |
| 10.00      | 6544      | 169      | 97.4         | 0.02582518 | 2.582518 | -7.34528462 | 0.0006 |

**Table S19** 2 mol% Cp\*2TiCl<sub>4</sub>, 4 mol% TEMPO 0.025 M Substrate **1** in MeCN – Run 1

| Time (min) | Area Ph2O | Area SUB | % Conversion | Asub/AIS   | %SM      | Ln[SM]    | [SM]   |
|------------|-----------|----------|--------------|------------|----------|-----------|--------|
| 0.00       | 4340      | 4632     | 3.0          | 1.06728111 | 100      | -3.688879 | 0.0250 |
| 0.50       | 5942      | 4015     | 24.9         | 0.67569842 | 75.0776  | -3.975527 | 0.0188 |
| 1.00       | 6505      | 3968     | 32.2         | 0.60999231 | 67.77692 | -4.077828 | 0.0169 |
| 1.50       | 6115      | 3215     | 41.6         | 0.52575634 | 58.41737 | -4.226436 | 0.0146 |
| 2.00       | 6185      | 2573     | 53.8         | 0.41600647 | 46.22294 | -4.460573 | 0.0116 |
| 2.50       | 6962      | 2410     | 61.5         | 0.3461649  | 38.46277 | -4.644359 | 0.0096 |
| 3.00       | 6832      | 1738     | 71.7         | 0.2543911  | 28.26568 | -4.952401 | 0.0071 |
| 3.50       | 6352      | 1108     | 80.6         | 0.17443325 | 19.38147 | -5.329732 | 0.0048 |
| 4.00       | 7710      | 1183     | 83.0         | 0.15343709 | 17.04857 | -5.457984 | 0.0043 |
| 4.50       | 6624      | 905      | 84.8         | 0.1366244  | 15.18049 | -5.574039 | 0.0038 |
| 5.00       | 6199      | 635      | 88.6         | 0.10243588 | 11.38176 | -5.862037 | 0.0028 |
| 6.00       | 6470      | 515      | 91.2         | 0.07959815 | 8.844238 | -6.114283 | 0.0022 |
| 7.00       | 5211      | 288      | 93.9         | 0.0552677  | 6.140856 | -6.479086 | 0.0015 |
| 8.00       | 6481      | 346      | 94.1         | 0.05338682 | 5.931869 | -6.51371  | 0.0015 |
| 9.00       | 4892      | 197      | 95.5         | 0.04026983 | 4.474425 | -6.795672 | 0.0011 |
| 10.00      | 6642      | 233      | 96.1         | 0.0350798  | 3.897755 | -6.933649 | 0.0010 |

**Table S20** 2 mol% Cp\*2TiCl, 4 mol% TEMPO 0.025 M Substrate **1** in MeCN – Run 2

| Time (min) | Area Ph2O | Area SUB | % Conversion | Asub/AIS   | %SM      | Ln[SM]    | [SM]   |
|------------|-----------|----------|--------------|------------|----------|-----------|--------|
| 0.00       | 4147      | 4509     | 1.2          | 1.08729202 | 100      | -3.688879 | 0.0250 |
| 0.50       | 6668      | 3973     | 25.5         | 0.59583083 | 74.47885 | -3.983534 | 0.0186 |
| 1.00       | 6288      | 3206     | 36.3         | 0.50986005 | 63.73251 | -4.139355 | 0.0159 |
| 1.50       | 2671      | 1103     | 48.4         | 0.41295395 | 51.61924 | -4.350155 | 0.0129 |
| 2.00       | 5906      | 1994     | 57.8         | 0.33762276 | 42.20284 | -4.551562 | 0.0106 |
| 2.50       | 6269      | 1945     | 61.2         | 0.31025682 | 38.7821  | -4.636091 | 0.0097 |
| 3.00       | 6055      | 1284     | 73.5         | 0.21205615 | 26.50702 | -5.01664  | 0.0066 |
| 3.50       | 5552      | 1098     | 75.3         | 0.19776657 | 24.72082 | -5.086404 | 0.0062 |
| 4.00       | 6870      | 1251     | 77.2         | 0.18209607 | 22.76201 | -5.168957 | 0.0057 |
| 4.50       | 6129      | 958      | 80.5         | 0.15630609 | 19.53826 | -5.321675 | 0.0049 |
| 5.00       | 6548      | 772      | 85.3         | 0.11789859 | 14.73732 | -5.603666 | 0.0037 |
| 6.00       | 5224      | 419      | 90.0         | 0.08020674 | 10.02584 | -5.988884 | 0.0025 |
| 7.00       | 7367      | 528      | 91.0         | 0.07167097 | 8.958871 | -6.101405 | 0.0022 |
| 8.00       | 6697      | 406      | 92.4         | 0.06062416 | 7.57802  | -6.268798 | 0.0019 |
| 9.00       | 7108      | 345      | 93.9         | 0.04853686 | 6.067107 | -6.491168 | 0.0015 |
| 10.00      | 5623      | 244      | 94.6         | 0.04339321 | 5.424151 | -6.603188 | 0.0014 |

**Table S21** 2 mol% Cp\*2TiCl, 4 mol% TEMPO 0.025 M Substrate **1** in MeCN – Run 3

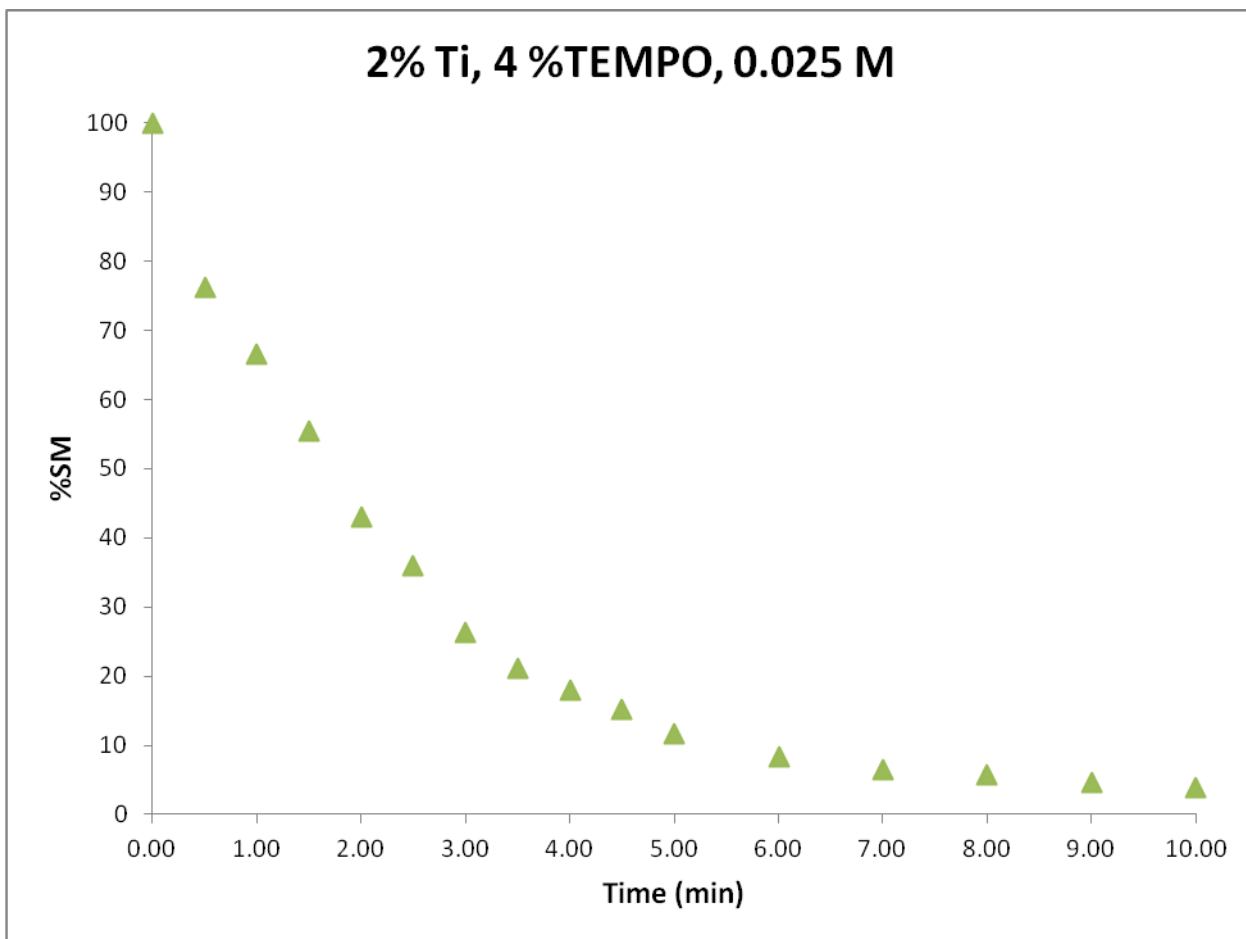

**Figure S16** Overlay of 3 kinetics experiments with 2 mol% Cp\*<sub>2</sub>TiCl<sub>4</sub>, 4 mol% TEMPO, 0.025 M substrate **1** in MeCN



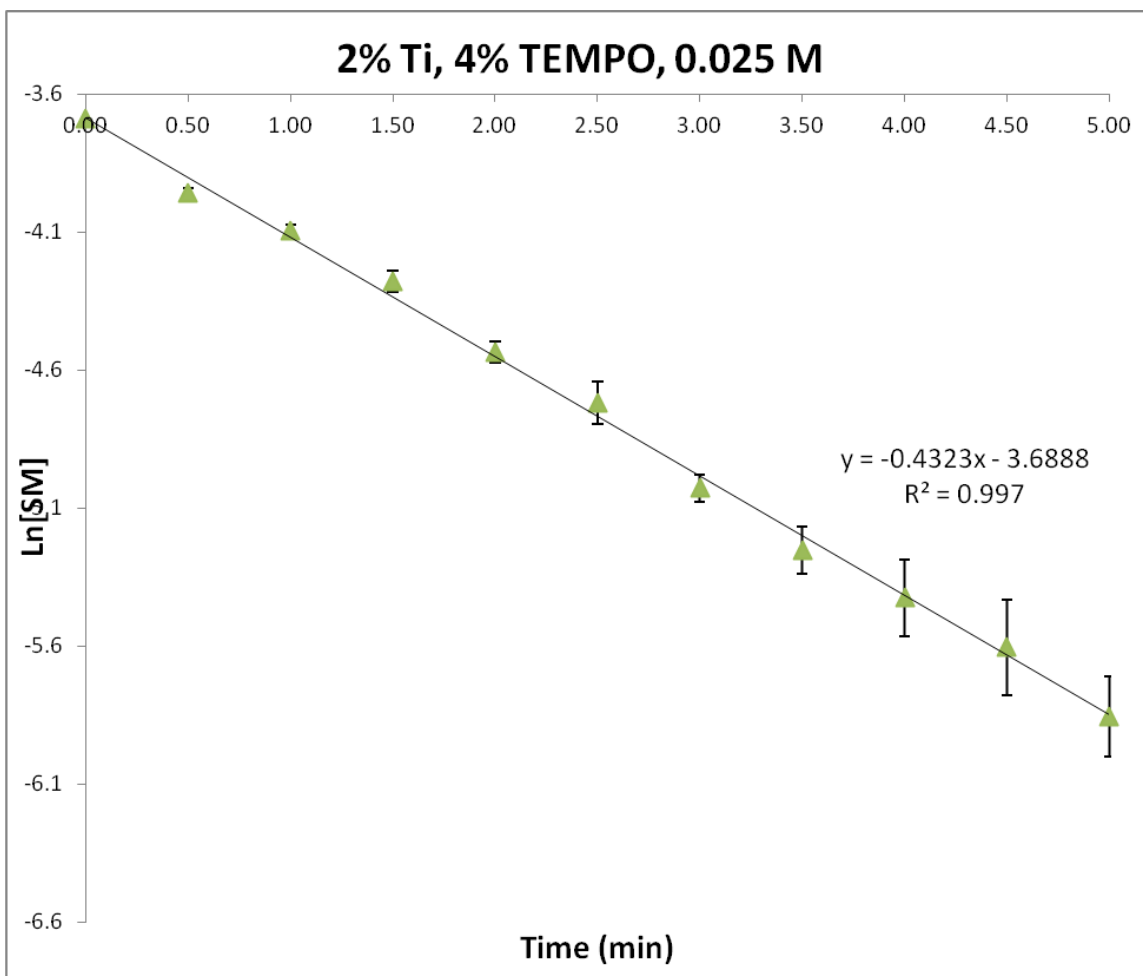

**Figure S17** Graph of Ln[SM] vs time for average of 3 kinetic runs with 2 mol% Cp\*<sub>2</sub>TiCl, 4 mol% TEMPO, 0.025 M substrate **1** in MeCN. Error bars calculated using standard error of the mean (standard deviation / sqrt(n))

| Time (min) | Area Ph2O | Area SUB | % Conversion | Asub/AIS   | %SM      | Ln[SM]      | [SM]   |
|------------|-----------|----------|--------------|------------|----------|-------------|--------|
| 0.00       | 4019      | 4800     | 0.5          | 1.19432695 | 100      | -3.68887945 | 0.0250 |
| 0.50       | 5181      | 4900     | 21.2         | 0.94576337 | 78.81361 | -3.92696389 | 0.0197 |
| 1.00       | 5751      | 4139     | 40.0         | 0.71970092 | 59.97508 | -4.20012055 | 0.0150 |
| 1.50       | 5827      | 3589     | 48.7         | 0.61592586 | 51.32716 | -4.35582969 | 0.0128 |
| 2.00       | 4726      | 1907     | 66.4         | 0.40351248 | 33.62604 | -4.77874886 | 0.0084 |
| 2.50       | 6089      | 2300     | 68.5         | 0.37773033 | 31.47753 | -4.84477575 | 0.0079 |
| 3.00       | 6210      | 1806     | 75.8         | 0.29082126 | 24.2351  | -5.10624745 | 0.0061 |
| 3.50       | 6086      | 1300     | 82.2         | 0.213605   | 17.80042 | -5.4148278  | 0.0045 |
| 4.00       | 5182      | 920      | 85.2         | 0.17753763 | 14.7948  | -5.5997737  | 0.0037 |
| 4.50       | 6688      | 1095     | 86.4         | 0.16372608 | 13.64384 | -5.68076152 | 0.0034 |
| 5.00       | 6208      | 796      | 89.3         | 0.12822165 | 10.68514 | -5.92519589 | 0.0027 |
| 6.00       | 5965      | 1028     | 85.6         | 0.17233864 | 14.36155 | -5.6294949  | 0.0036 |
| 7.00       | 6483      | 853      | 89.0         | 0.13157489 | 10.96457 | -5.89938011 | 0.0027 |
| 8.00       | 6512      | 808      | 89.7         | 0.12407862 | 10.33989 | -5.95804086 | 0.0026 |
| 9.00       | 7167      | 816      | 90.5         | 0.11385517 | 9.487931 | -6.04402909 | 0.0024 |
| 10.00      | 5975      | 543      | 92.4         | 0.09087866 | 7.573222 | -6.26943107 | 0.0019 |

**Table S22** 2 mol% Cp\*2TiCl, 5 mol% TEMPO 0.025 M Substrate **1** in MeCN – Run 1

| Time (min) | Area Ph2O | Area SUB | % Conversion | Asub/AIS   | %SM      | Ln[SM]    | [SM]   |
|------------|-----------|----------|--------------|------------|----------|-----------|--------|
| 0.00       | 5682      | 6100     | 2.4          | 1.07356565 | 100      | -3.688879 | 0.0250 |
| 0.50       | 5694      | 4102     | 20.0         | 0.72040745 | 80.04527 | -3.911457 | 0.0200 |
| 1.00       | 5266      | 2725     | 42.5         | 0.51747057 | 57.49673 | -4.242322 | 0.0144 |
| 1.50       | 5756      | 2563     | 50.5         | 0.4452745  | 49.47494 | -4.392583 | 0.0124 |
| 2.00       | 6699      | 2200     | 63.5         | 0.32840722 | 36.48969 | -4.69702  | 0.0091 |
| 2.50       | 4805      | 1396     | 67.7         | 0.2905307  | 32.28119 | -4.819565 | 0.0081 |
| 3.00       | 6948      | 1500     | 76.0         | 0.21588946 | 23.98772 | -5.116508 | 0.0060 |
| 3.50       | 5919      | 903      | 83.0         | 0.15255955 | 16.95106 | -5.463719 | 0.0042 |
| 4.00       | 7605      | 1000     | 85.4         | 0.13149244 | 14.61027 | -5.612325 | 0.0037 |
| 4.50       | 6881      | 900      | 88.1         | 0.13079494 | 11.89045 | -5.818314 | 0.0030 |
| 5.00       | 6962      | 800      | 89.6         | 0.11490951 | 10.44632 | -5.9478   | 0.0026 |
| 6.00       | 6394      | 600      | 91.5         | 0.09383797 | 8.530725 | -6.150375 | 0.0021 |
| 7.00       | 6426      | 500      | 92.9         | 0.0778089  | 7.073536 | -6.337689 | 0.0018 |
| 8.00       | 6576      | 557      | 92.3         | 0.08470195 | 7.700177 | -6.252806 | 0.0019 |
| 9.00       | 6558      | 480      | 93.3         | 0.07319305 | 6.653913 | -6.398844 | 0.0017 |
| 10.00      | 2825      | 221      | 92.9         | 0.07823009 | 7.111826 | -6.332291 | 0.0018 |

**Table S23** 2 mol% Cp\*2TiCl, 5 mol% TEMPO 0.025 M Substrate **1** in MeCN – Run 2

| Time (min) | Area Ph2O | Area SUB | % Conversion | Asub/AIS   | %SM      | Ln[SM]    | [SM]   |
|------------|-----------|----------|--------------|------------|----------|-----------|--------|
| 0.00       | 5011      | 6284     | 3.5          | 1.25404111 | 100      | -3.688879 | 0.0250 |
| 0.50       | 6562      | 6533     | 23.4         | 0.99558062 | 76.58312 | -3.955673 | 0.0191 |
| 1.00       | 6547      | 4820     | 43.4         | 0.73621506 | 56.63193 | -4.257477 | 0.0142 |
| 1.50       | 6282      | 4135     | 49.4         | 0.65822986 | 50.63307 | -4.369445 | 0.0127 |
| 2.00       | 7157      | 3720     | 60.0         | 0.51977085 | 39.98237 | -4.605611 | 0.0100 |
| 2.50       | 5551      | 2669     | 63.0         | 0.48081427 | 36.98571 | -4.683518 | 0.0092 |
| 3.00       | 5955      | 1500     | 80.6         | 0.25188917 | 19.37609 | -5.33001  | 0.0048 |
| 3.50       | 6481      | 1508     | 82.1         | 0.23268014 | 17.89847 | -5.409334 | 0.0045 |
| 4.00       | 6930      | 1100     | 87.8         | 0.15873016 | 12.21001 | -5.791793 | 0.0031 |
| 4.50       | 6708      | 900      | 89.7         | 0.13416816 | 10.32063 | -5.959905 | 0.0026 |
| 5.00       | 5631      | 960      | 89.3         | 0.17048482 | 10.6553  | -5.927992 | 0.0027 |
| 6.00       | 6844      | 1299     | 88.1         | 0.18980129 | 11.86258 | -5.820661 | 0.0030 |
| 7.00       | 6208      | 990      | 90.0         | 0.15947165 | 9.966978 | -5.994772 | 0.0025 |
| 8.00       | 6043      | 876      | 90.9         | 0.14496111 | 9.06007  | -6.090173 | 0.0023 |
| 9.00       | 6480      | 860      | 91.7         | 0.13271605 | 8.294753 | -6.178426 | 0.0021 |
| 10.00      | 6557      | 700      | 93.3         | 0.10675614 | 6.672259 | -6.396091 | 0.0017 |

**Table S24** 2 mol% Cp\*<sub>2</sub>TiCl, 5 mol% TEMPO 0.025 M Substrate **1** in MeCN – Run 3

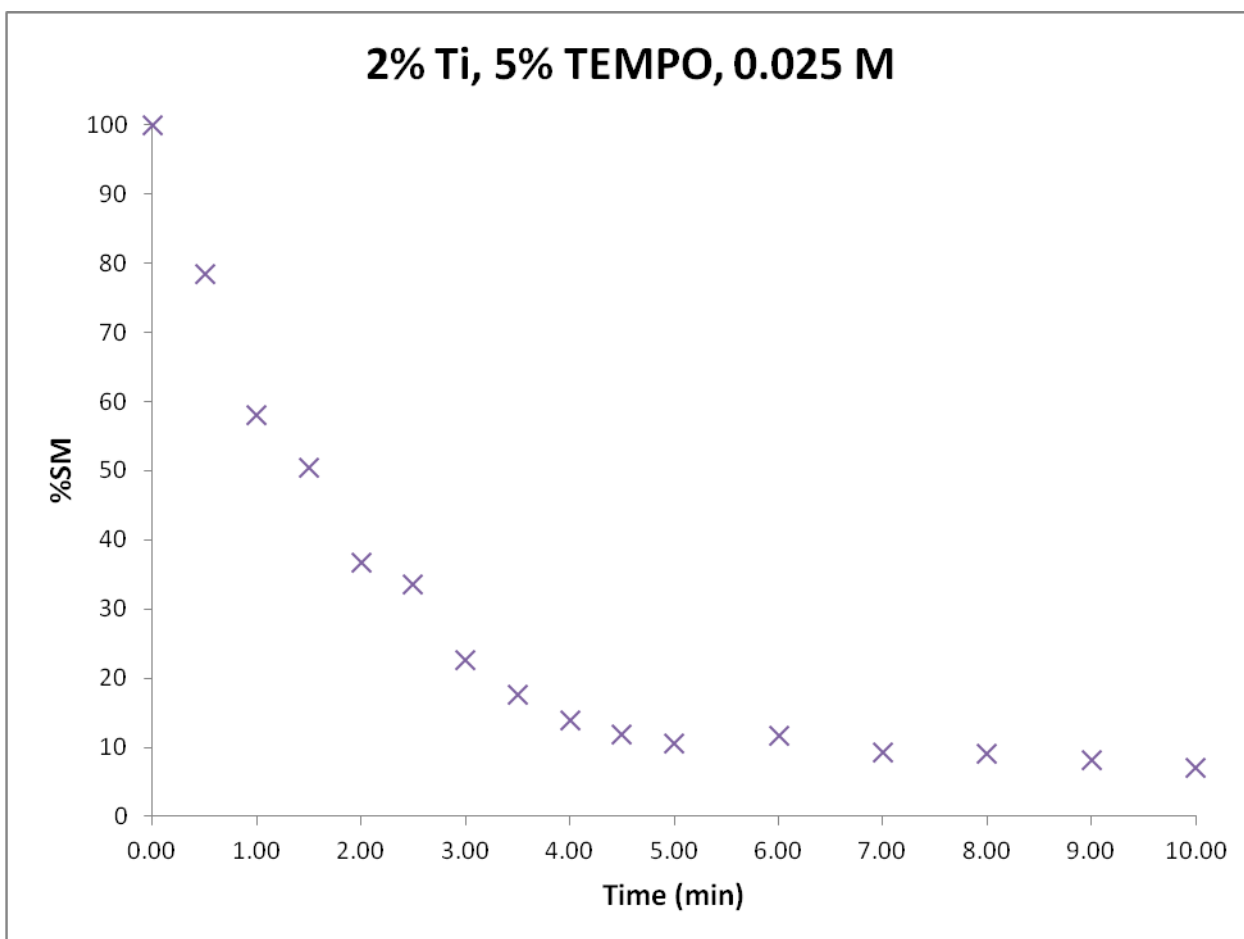

**Figure S18** Average of 3 kinetics experiments with 2 mol% Cp\*<sub>2</sub>TiCl<sub>4</sub>, 5 mol% TEMPO, 0.025 M substrate **1** in MeCN

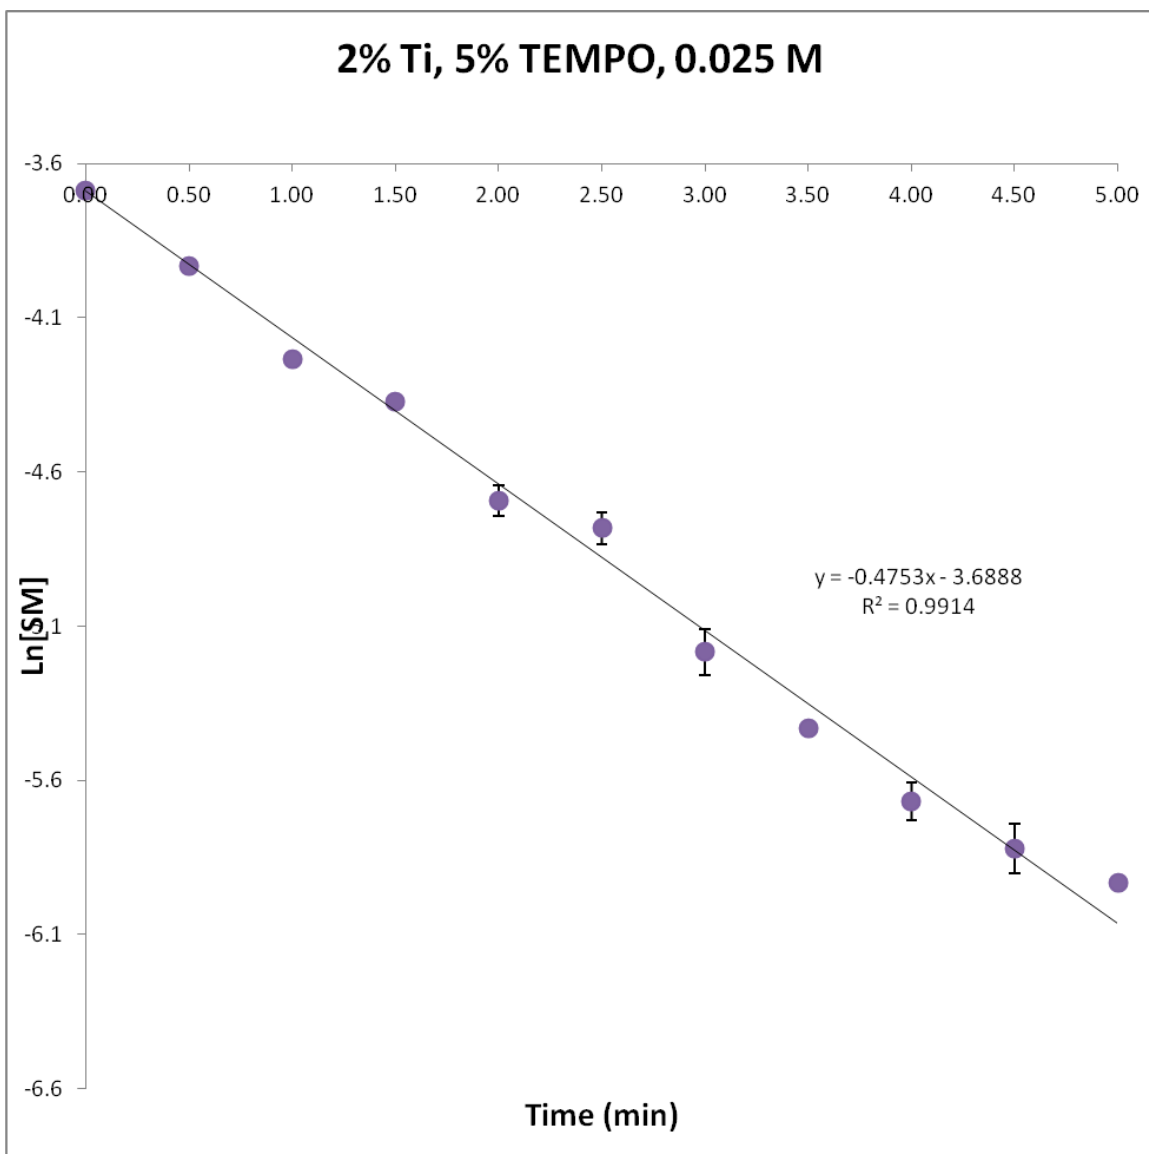

**Figure S19** Graph of Ln[SM] vs time for average of 3 kinetic runs with 2 mol% Cp\*<sub>2</sub>TiCl, 5 mol% TEMPO, 0.025 M substrate **1** in MeCN. Error bars calculated using standard error of the mean (standard deviation / sqrt(n))

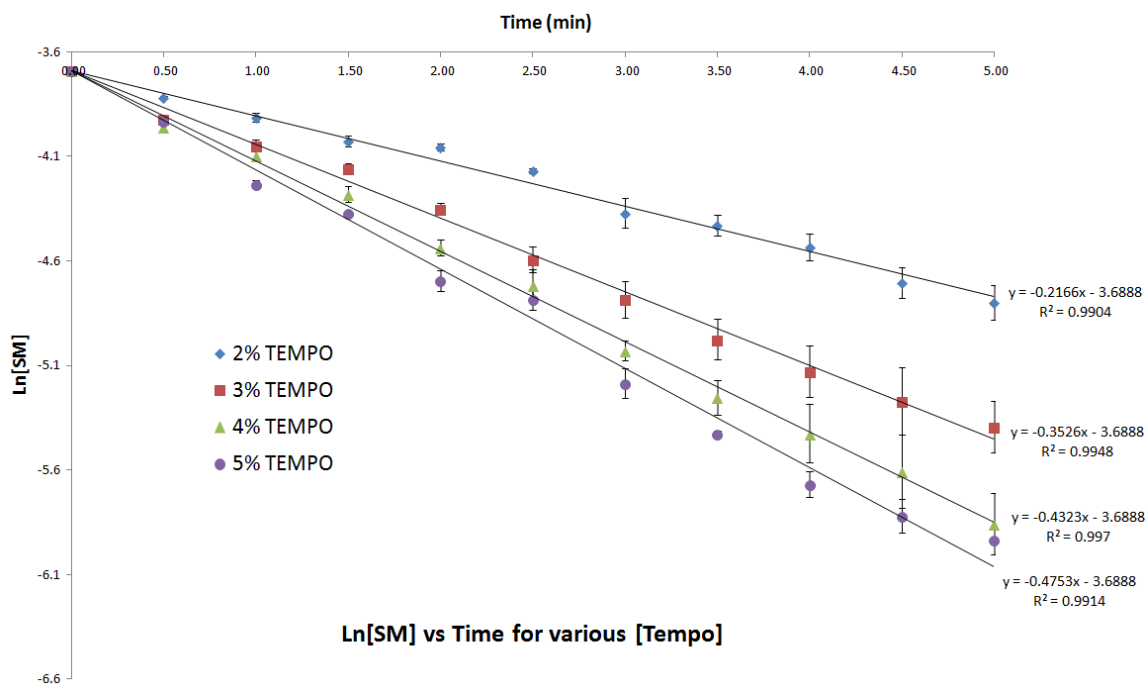

**Figure S20** Overlay of Ln[SM] vs time for various [TEMPO], 2 mol% Cp\*2TiCl, 0.025 M substrate **1** in MeCN at 23 °C. Each experiment was run in triplicate, data shown is the mean of the 3 values. Error bars were calculated by the standard error (standard deviation/square root(n))

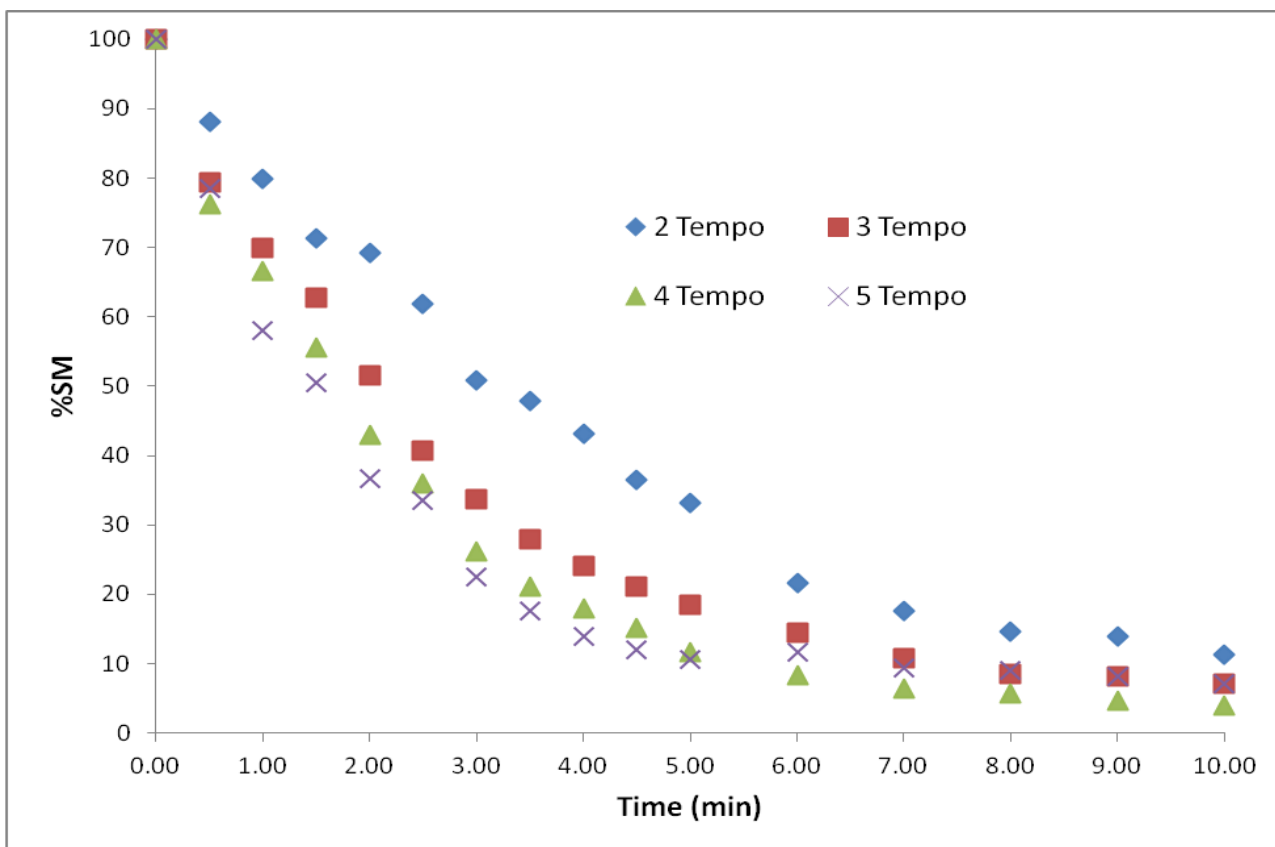

**Figure S21** Overlay of average of 3 runs of %SM vs time for various [TEMPO] (from 5 mol% to 2 mol%), 2 mol% Cp\*<sub>2</sub>TiCl, 0.025 M substrate **1** in MeCN at 23 °C.



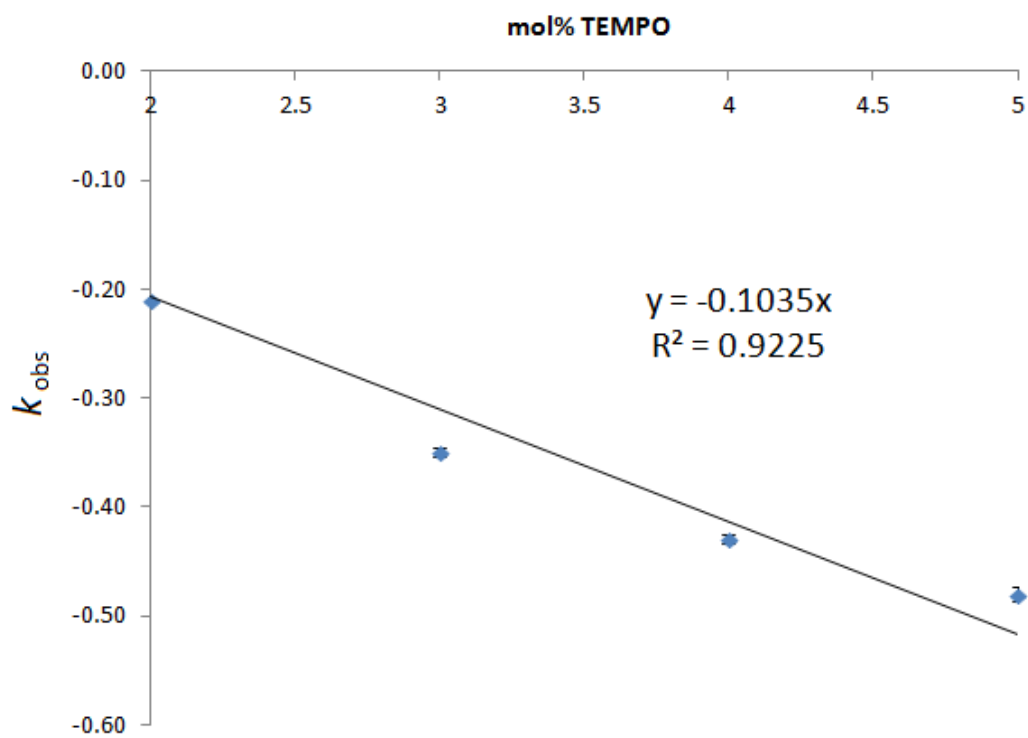

**Figure S22** Plot of  $k_{\text{obs}}$  vs [TEMPO]. Experiments all run with 2 mol% Cp\*<sub>2</sub>TiCl<sub>4</sub>, 0.025 M substrate **1** in MeCN at 23 °C.  $k_{\text{obs}}$  was calculated from the slope of Ln[SM] vs time plots. Each data point is the average of 3 experiments.

| Time (min) | Area Ph2O | Area SUB | % Conversion | Asub/AIS    | %SM         | Ln[SM]    | [SM]   |
|------------|-----------|----------|--------------|-------------|-------------|-----------|--------|
| 0.00       | 5816      | 6841     | 2.0          | 0.879470426 | 100         | -3.283414 | 0.0375 |
| 0.50       | 6374      | 6210     | 18.8         | 0.974270474 | 81.18920615 | -3.491802 | 0.0304 |
| 1.00       | 7351      | 6012     | 31.8         | 0.817847912 | 68.15399265 | -3.666815 | 0.0256 |
| 1.50       | 6091      | 4307     | 41.1         | 0.707108849 | 58.92573743 | -3.812307 | 0.0221 |
| 2.00       | 6184      | 4014     | 45.9         | 0.649094437 | 54.0912031  | -3.897913 | 0.0203 |
| 2.50       | 6657      | 3585     | 55.1         | 0.53853087  | 44.87757248 | -4.084646 | 0.0168 |
| 3.00       | 6452      | 2843     | 63.3         | 0.440638562 | 36.71988014 | -4.285266 | 0.0138 |
| 3.50       | 7083      | 3006     | 64.6         | 0.424396442 | 35.36637018 | -4.322823 | 0.0133 |
| 4.00       | 5310      | 1639     | 74.3         | 0.3086629   | 25.72190835 | -4.641241 | 0.0096 |
| 4.50       | 5562      | 1545     | 76.9         | 0.277777778 | 23.14814815 | -4.74667  | 0.0087 |
| 5.00       | 7144      | 1801     | 79.0         | 0.252099664 | 21.00830534 | -4.843667 | 0.0079 |
| 6.00       | 7699      | 1600     | 82.7         | 0.207819197 | 17.31826644 | -5.036823 | 0.0065 |
| 7.00       | 7814      | 1300     | 86.1         | 0.166368057 | 13.86400478 | -5.259289 | 0.0052 |
| 8.00       | 7522      | 1180     | 86.9         | 0.156873172 | 13.07276434 | -5.318054 | 0.0049 |
| 9.00       | 7645      | 1000     | 89.1         | 0.130804447 | 10.90037061 | -5.499788 | 0.0041 |
| 10.00      | 6577      | 800      | 89.9         | 0.121636004 | 10.13633369 | -5.572458 | 0.0038 |

**Table S25** 5 mol% Cp\*2TiCl<sub>4</sub>, 2 mol% TEMPO, 0.0375 M substrate **1** – Run 1

| Time (min) | Area Ph2O | Area SUB | % Conversion | Asub/AIS    | %SM         | Ln[SM]    | [SM]   |
|------------|-----------|----------|--------------|-------------|-------------|-----------|--------|
| 0.00       | 4995      | 6113     | 5.9          | 0.793193193 | 100         | -3.283414 | 0.0375 |
| 0.50       | 5964      | 6100     | 21.3         | 1.022803488 | 78.67719135 | -3.523231 | 0.0295 |
| 1.00       | 5411      | 4541     | 35.4         | 0.839216411 | 64.55510854 | -3.721065 | 0.0242 |
| 1.50       | 4606      | 3203     | 46.5         | 0.695397308 | 53.4921006  | -3.909051 | 0.0201 |
| 2.00       | 6266      | 4369     | 46.4         | 0.697255027 | 53.63500209 | -3.906383 | 0.0201 |
| 2.50       | 6853      | 4560     | 48.8         | 0.665402014 | 51.18477029 | -3.953142 | 0.0192 |
| 3.00       | 6963      | 3946     | 56.4         | 0.566709752 | 43.59305781 | -4.113687 | 0.0163 |
| 3.50       | 7092      | 4112     | 55.4         | 0.579808235 | 44.60063343 | -4.090836 | 0.0167 |
| 4.00       | 6013      | 3006     | 61.5         | 0.499916847 | 38.45514206 | -4.239092 | 0.0144 |
| 4.50       | 6918      | 2900     | 67.8         | 0.4191963   | 32.24586919 | -4.415195 | 0.0121 |
| 5.00       | 7144      | 2800     | 69.9         | 0.39193729  | 30.14902231 | -4.482432 | 0.0113 |
| 6.00       | 7699      | 2500     | 75.0         | 0.324717496 | 24.97826891 | -4.670578 | 0.0094 |
| 7.00       | 7814      | 2200     | 78.3         | 0.281545943 | 21.65738024 | -4.813238 | 0.0081 |
| 8.00       | 7522      | 1800     | 81.6         | 0.239298059 | 18.407543   | -4.975824 | 0.0069 |
| 9.00       | 7645      | 1500     | 84.9         | 0.196206671 | 15.09282085 | -5.174365 | 0.0057 |
| 10.00      | 6577      | 1000     | 88.3         | 0.152045005 | 11.69576964 | -5.429357 | 0.0044 |

**Table S26** 5 mol% Cp\*2TiCl, 2 mol% TEMPO, 0.0375 M substrate **1** – Run 2

| Time (min) | Area Ph2O | Area SUB | % Conversion | Asub/AIS    | %SM      | Ln[SM]    | [SM]   |
|------------|-----------|----------|--------------|-------------|----------|-----------|--------|
| 0.00       | 6684      | 7461     | 7.0          | 1.041741472 | 100      | -3.283414 | 0.0375 |
| 0.50       | 5140      | 4800     | 22.2         | 0.93385214  | 77.82101 | -3.534173 | 0.0292 |
| 1.00       | 7296      | 5873     | 32.9         | 0.804961623 | 67.08014 | -3.682697 | 0.0252 |
| 1.50       | 6855      | 5132     | 37.6         | 0.74865062  | 62.38755 | -3.755219 | 0.0234 |
| 2.00       | 6355      | 4209     | 44.8         | 0.662313139 | 55.19276 | -3.877753 | 0.0207 |
| 2.50       | 6042      | 3099     | 57.3         | 0.512909633 | 42.74247 | -4.133392 | 0.0160 |
| 3.00       | 6954      | 3371     | 59.6         | 0.484756974 | 40.39641 | -4.189844 | 0.0151 |
| 3.50       | 6705      | 2497     | 69.0         | 0.37240865  | 31.03405 | -4.453499 | 0.0116 |
| 4.00       | 7661      | 2361     | 74.3         | 0.30818431  | 25.68203 | -4.642793 | 0.0096 |
| 4.50       | 9191      | 2895     | 73.8         | 0.314982048 | 26.2485  | -4.620976 | 0.0098 |
| 5.00       | 6451      | 1431     | 81.5         | 0.221826073 | 18.48551 | -4.971598 | 0.0069 |
| 6.00       | 6399      | 1027     | 86.6         | 0.160493827 | 13.37449 | -5.295236 | 0.0050 |
| 7.00       | 6511      | 901      | 88.5         | 0.138381201 | 11.53177 | -5.443479 | 0.0043 |
| 8.00       | 6704      | 763      | 90.5         | 0.113812649 | 9.484387 | -5.638938 | 0.0036 |
| 9.00       | 7188      | 669      | 92.2         | 0.093071786 | 7.755982 | -5.84012  | 0.0029 |
| 10.00      | 6830      | 639      | 92.2         | 0.093557833 | 7.796486 | -5.834911 | 0.0029 |

**Table S27** 5 mol% Cp\*2TiCl<sub>4</sub>, 2 mol% TEMPO, 0.0375 M substrate **1** – Run 3

| Time (min) | Area Ph2O | Area SUB | % Conversion | Asub/AIS    | %SM         | Ln[SM]    | [SM]   |
|------------|-----------|----------|--------------|-------------|-------------|-----------|--------|
| 0.00       | 5157      | 3713     | 2.7          | 0.719992244 | 100         | -3.688879 | 0.0250 |
| 0.50       | 6535      | 3900     | 19.4         | 0.596786534 | 80.64682893 | -3.90397  | 0.0202 |
| 1.00       | 6694      | 3300     | 33.4         | 0.492978787 | 66.618755   | -4.095063 | 0.0167 |
| 1.50       | 7144      | 3191     | 39.6         | 0.446668533 | 60.36061257 | -4.193713 | 0.0151 |
| 2.00       | 6835      | 2583     | 48.9         | 0.377907827 | 51.06862532 | -4.360879 | 0.0128 |
| 2.50       | 7476      | 2683     | 51.5         | 0.358881755 | 48.49753445 | -4.412537 | 0.0121 |
| 3.00       | 7922      | 2429     | 58.6         | 0.306614491 | 41.43439071 | -4.569938 | 0.0104 |
| 3.50       | 6982      | 1874     | 63.7         | 0.268404469 | 36.27087414 | -4.703035 | 0.0091 |
| 4.00       | 6229      | 1445     | 68.7         | 0.231979451 | 31.34857445 | -4.848881 | 0.0078 |
| 4.50       | 6858      | 1533     | 69.8         | 0.223534558 | 30.20737273 | -4.885964 | 0.0076 |
| 5.00       | 7203      | 1352     | 74.6         | 0.18769957  | 25.36480671 | -5.060687 | 0.0063 |
| 6.00       | 6642      | 972      | 80.2         | 0.146341463 | 19.77587343 | -5.309587 | 0.0049 |
| 7.00       | 7180      | 900      | 83.1         | 0.125348189 | 16.93894452 | -5.464434 | 0.0042 |
| 8.00       | 7589      | 943      | 83.2         | 0.124258796 | 16.79172914 | -5.473163 | 0.0042 |
| 9.00       | 7279      | 799      | 85.2         | 0.109767825 | 14.8334899  | -5.597162 | 0.0037 |
| 10.00      | 6088      | 551      | 87.8         | 0.090505913 | 12.23052882 | -5.790114 | 0.0031 |

**Table S28** 5 mol% Cp\*2TiCl, 2 mol% TEMPO, 0.025 M substrate **1** – Run 1

| Time (min) | Area Ph2O | Area SUB | % Conversion | Asub/AIS    | %SM         | Ln[SM]    | [SM]   |
|------------|-----------|----------|--------------|-------------|-------------|-----------|--------|
| 0.00       | 5561      | 3910     | 5.0          | 0.703110951 | 100         | -3.688879 | 0.0250 |
| 0.50       | 5887      | 3400     | 22.0         | 0.57754374  | 78.04645141 | -3.936745 | 0.0195 |
| 1.00       | 6846      | 3578     | 29.4         | 0.522640958 | 70.62715652 | -4.036635 | 0.0177 |
| 1.50       | 7011      | 3100     | 40.2         | 0.442162316 | 59.75166437 | -4.203853 | 0.0149 |
| 2.00       | 5597      | 2213     | 46.6         | 0.395390388 | 53.43113347 | -4.315656 | 0.0134 |
| 2.50       | 6165      | 2070     | 54.6         | 0.335766423 | 45.37384099 | -4.479114 | 0.0113 |
| 3.00       | 8280      | 2400     | 60.8         | 0.289855072 | 39.16960439 | -4.626149 | 0.0098 |
| 3.50       | 5953      | 1577     | 64.2         | 0.26490845  | 35.79843912 | -4.716145 | 0.0089 |
| 4.00       | 6007      | 1329     | 70.1         | 0.221241884 | 29.89755196 | -4.896273 | 0.0075 |
| 4.50       | 6920      | 1270     | 75.2         | 0.183526012 | 24.80081237 | -5.083173 | 0.0062 |
| 5.00       | 7567      | 1200     | 78.6         | 0.158583322 | 21.43017869 | -5.229249 | 0.0054 |
| 6.00       | 7213      | 1000     | 81.3         | 0.138638569 | 18.73494179 | -5.363659 | 0.0047 |
| 7.00       | 6854      | 800      | 84.2         | 0.116720163 | 15.77299506 | -5.53575  | 0.0039 |
| 8.00       | 6594      | 700      | 85.7         | 0.106157113 | 14.34555575 | -5.630609 | 0.0036 |
| 9.00       | 7727      | 650      | 88.6         | 0.084120616 | 11.36765081 | -5.863278 | 0.0028 |
| 10.00      | 6655      | 600      | 87.8         | 0.090157776 | 12.18348326 | -5.793968 | 0.0030 |

**Table S29** 5 mol% Cp\*2TiCl, 2 mol% TEMPO, 0.025 M substrate **1** – Run 2

| Time (min) | Area Ph2O | Area SUB | % Conversion | Asub/AIS    | %SM      | Ln[SM]    | [SM]   |
|------------|-----------|----------|--------------|-------------|----------|-----------|--------|
| 0.00       | 6132      | 4152     | 8.5          | 0.677103718 | 100      | -3.688879 | 0.0250 |
| 0.50       | 6411      | 3800     | 19.9         | 0.592731243 | 80.09882 | -3.910789 | 0.0200 |
| 1.00       | 6896      | 3606     | 29.3         | 0.522911833 | 70.66376 | -4.036117 | 0.0177 |
| 1.50       | 5593      | 2410     | 41.8         | 0.430895763 | 58.22916 | -4.229663 | 0.0146 |
| 2.00       | 6212      | 2148     | 53.3         | 0.345782357 | 46.72735 | -4.44972  | 0.0117 |
| 2.50       | 5802      | 1680     | 60.9         | 0.289555326 | 39.1291  | -4.627183 | 0.0098 |
| 3.00       | 6318      | 1565     | 66.5         | 0.24770497  | 33.47364 | -4.783291 | 0.0084 |
| 3.50       | 6041      | 1439     | 67.8         | 0.238205595 | 32.18995 | -4.822395 | 0.0080 |
| 4.00       | 5456      | 1134     | 71.9         | 0.207844575 | 28.0871  | -4.958739 | 0.0070 |
| 4.50       | 6749      | 1250     | 75.0         | 0.185212624 | 25.02873 | -5.074025 | 0.0063 |
| 5.00       | 6904      | 1180     | 76.9         | 0.170915411 | 23.09668 | -5.154361 | 0.0058 |
| 6.00       | 6074      | 890      | 80.2         | 0.146526177 | 19.80083 | -5.308326 | 0.0050 |
| 7.00       | 7181      | 890      | 83.3         | 0.12393817  | 16.7484  | -5.475747 | 0.0042 |
| 8.00       | 6843      | 764      | 84.9         | 0.111646938 | 15.08742 | -5.580188 | 0.0038 |
| 9.00       | 6153      | 599      | 86.8         | 0.097350886 | 13.15553 | -5.717208 | 0.0033 |
| 10.00      | 6215      | 508      | 89.0         | 0.081737731 | 11.04564 | -5.892014 | 0.0028 |

**Table S30** 5 mol% Cp\*2TiCl, 2 mol% TEMPO, 0.025 M substrate **1** – Run 3

| Time (min) | Area Ph2O | Area SUB | % Conversion | Asub/AIS    | %SM         | Ln[SM]    | [SM]   |
|------------|-----------|----------|--------------|-------------|-------------|-----------|--------|
| 0.00       | 4679      | 3516     | -1.5         | 0.751442616 | 100         | -3.976562 | 0.0188 |
| 0.50       | 4093      | 2700     | 10.9         | 0.659662839 | 89.14362689 | -4.091483 | 0.0167 |
| 1.00       | 4586      | 2649     | 21.9         | 0.577627562 | 78.05777867 | -4.224282 | 0.0146 |
| 1.50       | 5442      | 2679     | 33.5         | 0.492282249 | 66.52462827 | -4.384159 | 0.0125 |
| 2.00       | 5269      | 2195     | 43.7         | 0.416587588 | 56.29561997 | -4.551115 | 0.0106 |
| 2.50       | 5679      | 1890     | 55.0         | 0.332805071 | 44.97365829 | -4.775655 | 0.0084 |
| 3.00       | 5775      | 1428     | 66.6         | 0.247272727 | 33.41523342 | -5.07272  | 0.0063 |
| 3.50       | 5527      | 1250     | 69.4         | 0.226162475 | 30.56249664 | -5.161958 | 0.0057 |
| 4.00       | 5166      | 885      | 76.8         | 0.171312427 | 23.15032803 | -5.439723 | 0.0043 |
| 4.50       | 5196      | 729      | 81.0         | 0.140300231 | 18.95949067 | -5.639427 | 0.0036 |
| 5.00       | 6037      | 756      | 83.1         | 0.125227762 | 16.92267056 | -5.753078 | 0.0032 |
| 6.00       | 6687      | 657      | 86.7         | 0.098250336 | 13.2770725  | -5.995693 | 0.0025 |
| 7.00       | 6914      | 475      | 90.7         | 0.068701186 | 9.283944054 | -6.353445 | 0.0017 |
| 8.00       | 6122      | 356      | 92.1         | 0.058150931 | 7.858233928 | -6.52017  | 0.0015 |
| 9.00       | 6818      | 352      | 93.0         | 0.051628043 | 6.976762624 | -6.639147 | 0.0013 |
| 10.00      | 6343      | 305      | 93.5         | 0.048084503 | 6.497905757 | -6.710252 | 0.0012 |

**Table S31** 5 mol% Cp\*2TiCl, 2 mol% TEMPO, 0.01875 M substrate **1** – Run 1



| Time (min) | Area Ph2O | Area SUB | % Conversion | Asub/AIS    | %SM         | Ln[SM]    | [SM]   |
|------------|-----------|----------|--------------|-------------|-------------|-----------|--------|
| 0.00       | 3966      | 2795     | -3.6         | 0.704740292 | 100         | -3.976562 | 0.0188 |
| 0.50       | 5470      | 2988     | 19.7         | 0.546252285 | 80.33121841 | -4.195573 | 0.0151 |
| 1.00       | 5794      | 2821     | 28.4         | 0.486882982 | 71.60043859 | -4.310631 | 0.0134 |
| 1.50       | 5400      | 2260     | 38.5         | 0.418518519 | 61.54684096 | -4.461933 | 0.0115 |
| 2.00       | 5757      | 2101     | 46.3         | 0.364947021 | 53.66867956 | -4.598902 | 0.0101 |
| 2.50       | 4944      | 1380     | 59.0         | 0.279126214 | 41.04797259 | -4.86699  | 0.0077 |
| 3.00       | 5036      | 1040     | 69.6         | 0.206513106 | 30.36957436 | -5.16829  | 0.0057 |
| 3.50       | 5860      | 1266     | 68.2         | 0.216040956 | 31.77072877 | -5.123186 | 0.0060 |
| 4.00       | 5244      | 894      | 74.9         | 0.170480549 | 25.070669   | -5.360033 | 0.0047 |
| 4.50       | 4742      | 705      | 78.1         | 0.148671447 | 21.86344804 | -5.496916 | 0.0041 |
| 5.00       | 5302      | 680      | 81.1         | 0.128253489 | 18.86080724 | -5.644646 | 0.0035 |
| 6.00       | 4771      | 406      | 87.5         | 0.085097464 | 12.51433292 | -6.054857 | 0.0023 |
| 7.00       | 4773      | 314      | 90.3         | 0.065786717 | 9.674517198 | -6.312236 | 0.0018 |
| 8.00       | 6276      | 470      | 89.0         | 0.074888464 | 11.01300941 | -6.182654 | 0.0021 |
| 9.00       | 7020      | 528      | 88.9         | 0.075213675 | 11.06083459 | -6.178321 | 0.0021 |
| 10.00      | 5960      | 364      | 91.0         | 0.061073826 | 8.981444927 | -6.386571 | 0.0017 |

**Table S32** 5 mol% Cp\*2TiCl<sub>4</sub>, 2 mol% TEMPO, 0.01875 M substrate **1** – Run 2

| Time (min) | Area Ph2O | Area SUB | % Conversion | Asub/AIS    | %SM      | Ln[SM]    | [SM]   |
|------------|-----------|----------|--------------|-------------|----------|-----------|--------|
| 0.00       | 2893      | 2091     | 2.3          | 0.722779122 | 100      | -3.976562 | 0.0188 |
| 0.50       | 5510      | 3506     | 14.0         | 0.636297641 | 85.98617 | -4.127545 | 0.0161 |
| 1.00       | 5965      | 3220     | 27.1         | 0.539815591 | 72.94805 | -4.291984 | 0.0137 |
| 1.50       | 5460      | 2432     | 39.8         | 0.445421245 | 60.19206 | -4.484191 | 0.0113 |
| 2.00       | 5616      | 2025     | 51.3         | 0.360576923 | 48.72661 | -4.695506 | 0.0091 |
| 2.50       | 6711      | 2412     | 51.4         | 0.359409924 | 48.56891 | -4.698748 | 0.0091 |
| 3.00       | 5335      | 1365     | 65.4         | 0.255857545 | 34.57534 | -5.038591 | 0.0065 |
| 3.50       | 6408      | 1647     | 65.3         | 0.257022472 | 34.73277 | -5.034048 | 0.0065 |
| 4.00       | 5748      | 1083     | 74.5         | 0.188413361 | 25.46127 | -5.344573 | 0.0048 |
| 4.50       | 5750      | 973      | 77.1         | 0.169217391 | 22.86722 | -5.452027 | 0.0043 |
| 5.00       | 5086      | 752      | 80.0         | 0.147856862 | 19.98066 | -5.586967 | 0.0037 |
| 6.00       | 5377      | 636      | 84.0         | 0.11828157  | 15.984   | -5.810144 | 0.0030 |
| 7.00       | 4429      | 438      | 86.6         | 0.098893655 | 13.36401 | -5.989167 | 0.0025 |
| 8.00       | 5823      | 546      | 87.3         | 0.0937661   | 12.67109 | -6.042408 | 0.0024 |
| 9.00       | 5175      | 362      | 90.5         | 0.069951691 | 9.452931 | -6.335407 | 0.0018 |
| 10.00      | 5072      | 397      | 89.4         | 0.078272871 | 10.57741 | -6.223011 | 0.0020 |

**Table S33** 5 mol% Cp\*2TiCl, 2 mol% TEMPO, 0.01875 M substrate **1** – Run 3

| Sample | Area Ph2O | Area SUB | % Conversion | Asub/AIS    | %SM      | Ln[SM]    | [SM]   |
|--------|-----------|----------|--------------|-------------|----------|-----------|--------|
| 0.00   | 3688      | 2219     | -0.3         | 0.601681128 | 100      | -4.382027 | 0.0125 |
| 0.50   | 3413      | 1758     | 26.4         | 0.515089364 | 73.58419 | -4.688767 | 0.0092 |
| 1.00   | 4710      | 2268     | 31.2         | 0.481528662 | 68.78981 | -4.756141 | 0.0086 |
| 1.50   | 4669      | 2088     | 36.1         | 0.447204969 | 63.88642 | -4.83009  | 0.0080 |
| 2.00   | 4306      | 1530     | 49.2         | 0.355318161 | 50.75974 | -5.060093 | 0.0063 |
| 2.50   | 4143      | 1171     | 59.6         | 0.282645426 | 40.37792 | -5.288914 | 0.0050 |
| 3.00   | 5624      | 1214     | 69.2         | 0.215860597 | 30.83723 | -5.558474 | 0.0039 |
| 3.50   | 3937      | 690      | 75.0         | 0.175260351 | 25.03719 | -5.766834 | 0.0031 |
| 4.00   | 4842      | 832      | 75.5         | 0.171829822 | 24.54712 | -5.786602 | 0.0031 |
| 4.50   | 4418      | 631      | 79.6         | 0.142824808 | 20.40354 | -5.971488 | 0.0026 |
| 5.00   | 5152      | 530      | 85.3         | 0.102872671 | 14.6961  | -6.299615 | 0.0018 |
| 6.00   | 4018      | 290      | 89.7         | 0.072175212 | 10.31074 | -6.65401  | 0.0013 |
| 7.00   | 4780      | 251      | 92.5         | 0.05251046  | 7.501494 | -6.972095 | 0.0009 |
| 8.00   | 4752      | 263      | 92.1         | 0.055345118 | 7.906445 | -6.919519 | 0.0010 |
| 9.00   | 4523      | 250      | 92.1         | 0.055273049 | 7.89615  | -6.920822 | 0.0010 |
| 10.00  | 4095      | 147      | 94.9         | 0.035897436 | 5.128205 | -7.352441 | 0.0006 |

**Table S34** 5 mol% Cp\*2TiCl, 2 mol% TEMPO, 0.0125 M substrate **1** – Run 1

| Sample | Area Ph2O | Area SUB | % Conversion | Asub/AIS    | %SM      | Ln[SM]    | [SM]   |
|--------|-----------|----------|--------------|-------------|----------|-----------|--------|
| 0.00   | 3410      | 2199     | 5.2          | 0.644868035 | 100      | -4.382027 | 0.0125 |
| 0.50   | 3617      | 2000     | 18.7         | 0.552944429 | 81.31536 | -4.588862 | 0.0102 |
| 1.00   | 4611      | 2100     | 33.0         | 0.455432661 | 66.97539 | -4.782872 | 0.0084 |
| 1.50   | 3857      | 1592     | 39.3         | 0.412756028 | 60.69942 | -4.881263 | 0.0076 |
| 2.00   | 4052      | 1221     | 55.7         | 0.301332675 | 44.31363 | -5.195905 | 0.0055 |
| 2.50   | 3907      | 1027     | 61.3         | 0.262861531 | 38.65611 | -5.332492 | 0.0048 |
| 3.00   | 3456      | 764      | 67.5         | 0.221064815 | 32.50953 | -5.505663 | 0.0041 |
| 3.50   | 4252      | 752      | 74.0         | 0.176857949 | 26.00852 | -5.728773 | 0.0033 |
| 4.00   | 5139      | 862      | 75.3         | 0.167736914 | 24.66719 | -5.781723 | 0.0031 |
| 4.50   | 2899      | 400      | 79.7         | 0.137978613 | 20.29097 | -5.977021 | 0.0025 |
| 5.00   | 4529      | 611      | 80.2         | 0.134908368 | 19.83947 | -5.999524 | 0.0025 |
| 6.00   | 4730      | 499      | 84.5         | 0.105496829 | 15.51424 | -6.245439 | 0.0019 |
| 7.00   | 4801      | 444      | 86.4         | 0.092480733 | 13.60011 | -6.377119 | 0.0017 |
| 8.00   | 4942      | 382      | 88.6         | 0.077296641 | 11.36715 | -6.556469 | 0.0014 |
| 9.00   | 4849      | 287      | 91.3         | 0.059187461 | 8.704038 | -6.82341  | 0.0011 |
| 10.00  | 4721      | 275      | 91.4         | 0.058250371 | 8.566231 | -6.839369 | 0.0011 |

**Table S35** 5 mol% Cp\*2TiCl<sub>2</sub>, 2 mol% TEMPO, 0.0125 M substrate **1** – Run 2

| Sample | Area Ph2O | Area SUB | % Conversion | Asub/AIS   | %SM      | Ln[SM]    | [SM]   |
|--------|-----------|----------|--------------|------------|----------|-----------|--------|
| 0.00   | 2652      | 3094     | 2.8          | 1.16666667 | 100      | -4.382027 | 0.0125 |
| 0.50   | 3221      | 2942     | 23.9         | 0.91338094 | 76.11508 | -4.65495  | 0.0095 |
| 1.00   | 3333      | 2857     | 28.6         | 0.85718572 | 71.43214 | -4.718449 | 0.0089 |
| 1.50   | 2380      | 1700     | 40.5         | 0.71428571 | 59.52381 | -4.90082  | 0.0074 |
| 2.00   | 2566      | 1624     | 47.3         | 0.63289166 | 52.74097 | -5.021804 | 0.0066 |
| 2.50   | 2798      | 1376     | 59.0         | 0.49177984 | 40.98165 | -5.274072 | 0.0051 |
| 3.00   | 3312      | 1384     | 65.2         | 0.4178744  | 34.82287 | -5.436923 | 0.0044 |
| 3.50   | 2848      | 1000     | 70.7         | 0.3511236  | 29.2603  | -5.610965 | 0.0037 |
| 4.00   | 3152      | 989      | 73.9         | 0.31376904 | 26.14742 | -5.723446 | 0.0033 |
| 4.50   | 2878      | 830      | 76.0         | 0.28839472 | 24.03289 | -5.807773 | 0.0030 |
| 5.00   | 2686      | 785      | 75.6         | 0.29225614 | 24.35468 | -5.794473 | 0.0030 |
| 6.00   | 2479      | 513      | 82.8         | 0.20693828 | 17.24486 | -6.139683 | 0.0022 |
| 7.00   | 3247      | 749      | 80.8         | 0.23067447 | 19.22287 | -6.031096 | 0.0024 |
| 8.00   | 2249      | 439      | 83.7         | 0.19519787 | 16.26649 | -6.19809  | 0.0020 |
| 9.00   | 2864      | 687      | 80.0         | 0.2398743  | 19.98953 | -5.991988 | 0.0025 |
| 10.00  | 2882      | 558      | 83.9         | 0.19361554 | 16.13463 | -6.206229 | 0.0020 |

**Table S36** 5 mol% Cp\*2TiCl<sub>2</sub>, 2 mol% TEMPO, 0.0125 M substrate **1** – Run 3

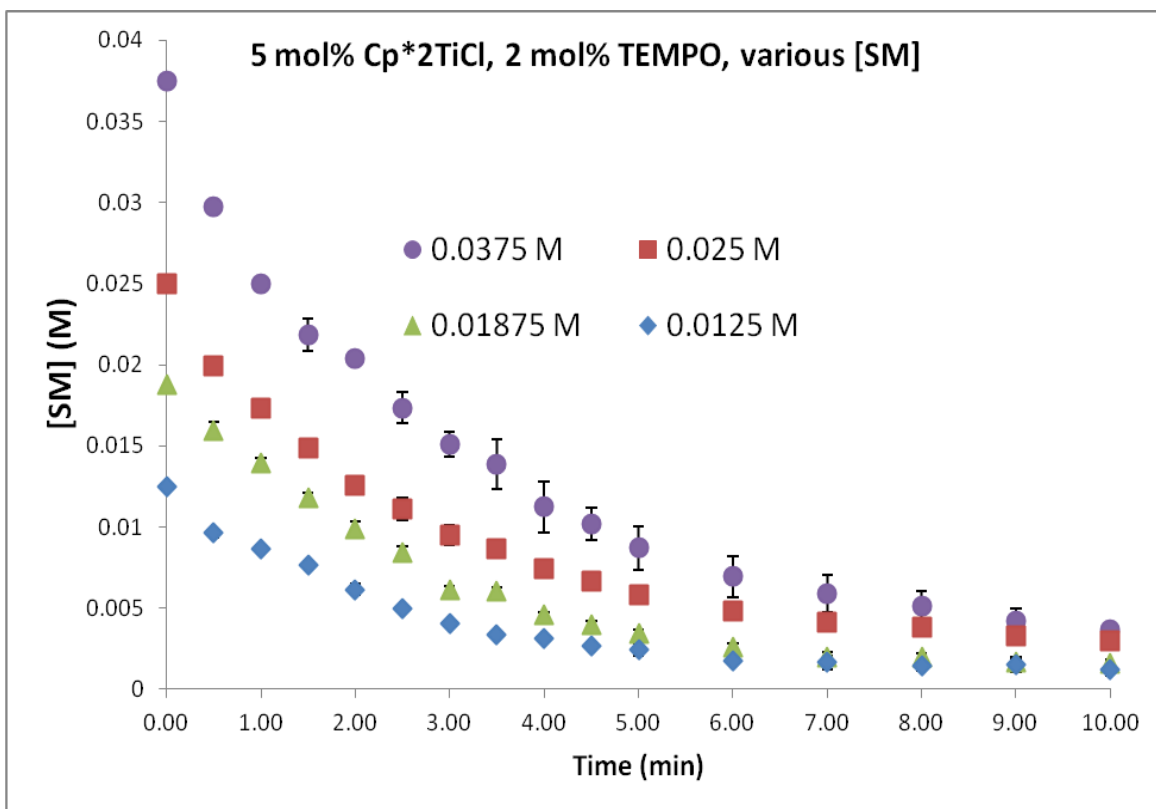

**Figure S23** Each data set is an average of 3 kinetic runs with 5 mol% Cp\*2TiCl, 2 mol% TEMPO, various starting concentration of substrate **1**. Error bars were calculated by the standard error of the means. (stdev / sqrt (n))

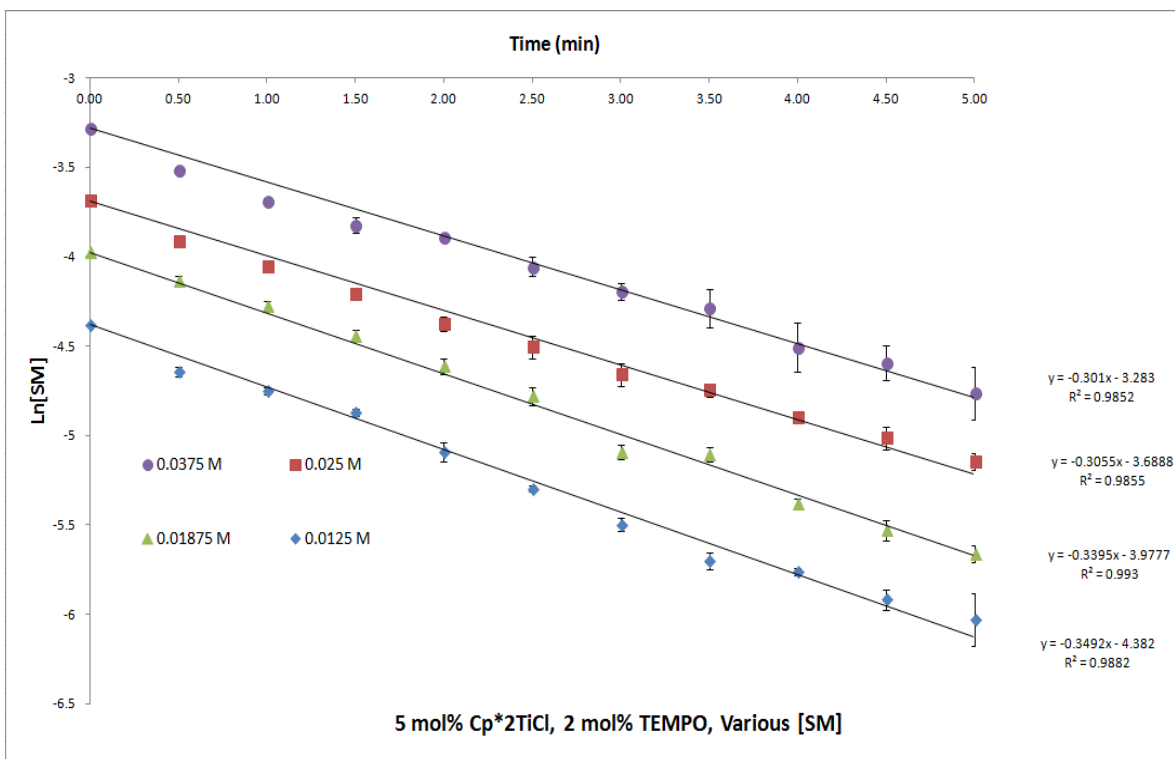

**Figure S24** Each data set is an average of 3 kinetic runs using 5 mol% Cp\*2TiCl, 2 mol% TEMPO, various starting concentration of substrate **1**. Error bars were calculated by the standard error of the means. (stdev / sqrt (n))

| Time (min) | Area Ph2O | Area SUB | % Conversion | Asub/AIS    | %SM      | Ln[SM]    | [SM]   |
|------------|-----------|----------|--------------|-------------|----------|-----------|--------|
| 0.00       | 5234      | 3241     | 0.0          | 0.619220481 | 100      | -3.6888   | 0.0250 |
| 0.50       | 5747      | 3314     | 7.0          | 0.576648686 | 93.00785 | -3.761366 | 0.0233 |
| 1.00       | 4581      | 2424     | 14.7         | 0.529142109 | 85.3455  | -3.847342 | 0.0213 |
| 1.50       | 6038      | 3583     | 4.3          | 0.593408413 | 95.71103 | -3.732716 | 0.0239 |
| 2.00       | 5629      | 3061     | 12.3         | 0.543791082 | 87.70824 | -3.820034 | 0.0219 |
| 2.50       | 5791      | 3041     | 15.3         | 0.525125194 | 84.69761 | -3.854962 | 0.0212 |
| 3.00       | 4463      | 2220     | 19.8         | 0.497423258 | 80.22956 | -3.909158 | 0.0201 |
| 3.50       | 5834      | 3199     | 11.6         | 0.548337333 | 88.44151 | -3.811708 | 0.0221 |
| 4.00       | 5308      | 3103     | 5.7          | 0.584589299 | 94.2886  | -3.747689 | 0.0236 |
| 4.50       | 6086      | 3461     | 8.3          | 0.568682221 | 91.72294 | -3.775277 | 0.0229 |
| 5.00       | 5268      | 2900     | 11.2         | 0.550493546 | 88.78928 | -3.807784 | 0.0222 |
| 6.00       | 5374      | 2877     | 13.7         | 0.535355415 | 86.34765 | -3.835668 | 0.0216 |
| 7.00       | 5192      | 2520     | 21.7         | 0.485362096 | 78.28421 | -3.933704 | 0.0196 |
| 8.00       | 5445      | 2589     | 23.3         | 0.475482094 | 76.69066 | -3.95427  | 0.0192 |
| 9.00       | 5925      | 2922     | 20.5         | 0.493164557 | 79.54267 | -3.917756 | 0.0199 |
| 10.00      | 4504      | 2080     | 25.5         | 0.461811723 | 74.48576 | -3.983442 | 0.0186 |
| 15.00      | 5134      | 2160     | 32.1         | 0.420724581 | 67.8588  | -4.076621 | 0.0170 |

**Table S37** 5 mol% Cp\*2TiCl, 2 mol% TEMPO, 0.025 M Deuterated **1** – Run 1



| Time (min) | Area Ph2O | Area SUB | % Conversion | Asub/AIS    | %SM      | Ln[SM]    | [SM]   |
|------------|-----------|----------|--------------|-------------|----------|-----------|--------|
| 0.00       | 5132      | 3810     | 0.0          | 0.742400624 | 100      | -3.68888  | 0.0250 |
| 0.50       | 4769      | 3200     | 9.3          | 0.67100021  | 90.6757  | -3.78676  | 0.0227 |
| 1.00       | 5468      | 3558     | 12.1         | 0.650694952 | 87.93175 | -3.817489 | 0.0220 |
| 1.50       | 6339      | 4453     | 5.1          | 0.702476731 | 94.92929 | -3.740917 | 0.0237 |
| 2.00       | 5900      | 3728     | 14.6         | 0.631864407 | 85.38708 | -3.846855 | 0.0213 |
| 2.50       | 5946      | 4016     | 8.7          | 0.675412042 | 91.2719  | -3.780207 | 0.0228 |
| 3.00       | 6134      | 3935     | 13.3         | 0.641506358 | 86.69005 | -3.831711 | 0.0217 |
| 3.50       | 5026      | 2991     | 19.6         | 0.595105452 | 80.41966 | -3.906791 | 0.0201 |
| 4.00       | 4597      | 2843     | 16.4         | 0.618446813 | 83.57389 | -3.868318 | 0.0209 |
| 4.50       | 4738      | 2695     | 23.1         | 0.568805403 | 76.8656  | -3.951991 | 0.0192 |
| 5.00       | 4545      | 2777     | 17.4         | 0.6110011   | 82.56772 | -3.880431 | 0.0206 |
| 6.00       | 5101      | 2892     | 23.4         | 0.566947657 | 76.61455 | -3.955263 | 0.0192 |
| 7.00       | 4689      | 2600     | 25.1         | 0.55448923  | 74.93098 | -3.977482 | 0.0187 |
| 8.00       | 5391      | 2743     | 31.2         | 0.508810981 | 68.75824 | -4.063453 | 0.0172 |
| 9.00       | 5597      | 2946     | 28.9         | 0.526353404 | 71.12884 | -4.029557 | 0.0178 |
| 10.00      | 4730      | 2361     | 32.5         | 0.499154334 | 67.45329 | -4.082614 | 0.0169 |
| 15.00      | 5877      | 2931     | 32.6         | 0.498723839 | 67.39511 | -4.083477 | 0.0168 |

**Table S38** 5 mol% Cp\*2TiCl, 2 mol% TEMPO, 0.025 M Deuterated – Run 2

| Time (min) | Area Ph2O | Area SUB | % Conversion | Asub/AIS   | %SM      | Ln[SM]    | [SM]   |
|------------|-----------|----------|--------------|------------|----------|-----------|--------|
| 0.00       | 4891      | 3610     | 0.0          | 0.73809037 | 100      | -3.6888   | 0.0250 |
| 0.50       | 5182      | 3725     | 2.9          | 0.71883443 | 97.13979 | -3.717899 | 0.0243 |
| 1.00       | 5770      | 4206     | 1.5          | 0.72894281 | 98.50578 | -3.703934 | 0.0246 |
| 1.50       | 5268      | 3393     | 13.0         | 0.64407745 | 87.03749 | -3.827711 | 0.0218 |
| 2.00       | 5227      | 3449     | 10.8         | 0.65984312 | 89.16799 | -3.803528 | 0.0223 |
| 2.50       | 4126      | 2588     | 15.2         | 0.62724188 | 84.76242 | -3.854197 | 0.0212 |
| 3.00       | 6040      | 4072     | 8.9          | 0.67417219 | 91.10435 | -3.782044 | 0.0228 |
| 3.50       | 4583      | 2892     | 14.7         | 0.63102771 | 85.27402 | -3.84818  | 0.0213 |
| 4.00       | 5562      | 3520     | 14.5         | 0.63286588 | 85.52242 | -3.845271 | 0.0214 |
| 4.50       | 5846      | 3535     | 18.3         | 0.60468697 | 81.71445 | -3.890819 | 0.0204 |
| 5.00       | 4567      | 2804     | 17.0         | 0.61396978 | 82.96889 | -3.875584 | 0.0207 |
| 6.00       | 5465      | 3530     | 12.7         | 0.64592864 | 87.28765 | -3.824841 | 0.0218 |
| 7.00       | 5015      | 2969     | 20.0         | 0.59202393 | 80.00323 | -3.911983 | 0.0200 |
| 8.00       | 5661      | 3444     | 17.8         | 0.60837308 | 82.21258 | -3.884741 | 0.0206 |
| 9.00       | 4174      | 2351     | 23.9         | 0.56324868 | 76.11469 | -3.961808 | 0.0190 |
| 10.00      | 5284      | 2987     | 23.6         | 0.56529145 | 76.39074 | -3.958188 | 0.0191 |
| 15.00      | 5224      | 2830     | 26.8         | 0.54173047 | 73.20682 | -4.000761 | 0.0183 |

**Table S39** 5% Ti, 2% TEMPO, 0.025 M Deuterated – Run 3

| Time (min) | Area Ph2O | Area SUB | % Conversion | Asub/AIS   | %SM      | Ln[SM]    | [SM]   |
|------------|-----------|----------|--------------|------------|----------|-----------|--------|
| 0.50       | 5871      | 3612     | 0.0          | 0.61522739 | 100      | -3.688879 | 0.0250 |
| 1.00       | 6162      | 3609     | 5.5          | 0.58568647 | 94.46556 | -3.745814 | 0.0236 |
| 1.50       | 6648      | 3920     | 4.9          | 0.58965102 | 95.105   | -3.739068 | 0.0238 |
| 2.00       | 6097      | 3289     | 13.0         | 0.53944563 | 87.00736 | -3.828057 | 0.0218 |
| 2.50       | 5100      | 2685     | 15.1         | 0.52647059 | 84.91461 | -3.852403 | 0.0212 |
| 3.00       | 6584      | 3424     | 16.1         | 0.5200486  | 83.87881 | -3.864677 | 0.0210 |
| 3.50       | 6384      | 3204     | 19.1         | 0.5018797  | 80.94834 | -3.900238 | 0.0202 |
| 4.00       | 7294      | 4066     | 10.1         | 0.55744447 | 89.9104  | -3.795236 | 0.0225 |
| 4.50       | 6428      | 3382     | 15.1         | 0.52613566 | 84.86059 | -3.85304  | 0.0212 |
| 5.00       | 6506      | 3505     | 13.1         | 0.53873348 | 86.8925  | -3.829378 | 0.0217 |
| 6.00       | 6428      | 3223     | 19.1         | 0.50140012 | 80.87099 | -3.901194 | 0.0202 |
| 7.00       | 5780      | 2607     | 27.3         | 0.45103806 | 72.74807 | -4.007047 | 0.0182 |
| 8.00       | 5303      | 2174     | 33.9         | 0.40995663 | 66.12204 | -4.102548 | 0.0165 |
| 9.00       | 5902      | 2527     | 30.9         | 0.42815995 | 69.05806 | -4.059102 | 0.0173 |
| 10.00      | 6799      | 3231     | 23.4         | 0.47521694 | 76.64789 | -3.954828 | 0.0192 |
| 15.00      | 6213      | 2377     | 38.3         | 0.3825849  | 61.70724 | -4.171648 | 0.0154 |

**Table S40** 5% Ti, 2% TEMPO, 0.025 M Deuterated – Run 4

| Time(min) | Area Ph2O | Area SUB | % Conversion | Asub/AIS   | %SM      | Ln[SM]       |
|-----------|-----------|----------|--------------|------------|----------|--------------|
| 0.00      | 5157      | 3784     | 0.0          | 0.73375994 | 100      | -3.688879454 |
| 0.50      | 6535      | 3900     | 19.4         | 0.59678653 | 80.64683 | -3.903970155 |
| 1.00      | 6694      | 3300     | 33.4         | 0.49297879 | 66.61875 | -4.095063496 |
| 1.50      | 7144      | 3191     | 39.6         | 0.44666853 | 60.36061 | -4.193712858 |
| 2.00      | 6835      | 2583     | 48.9         | 0.37790783 | 51.06863 | -4.360879317 |
| 2.50      | 7476      | 2683     | 51.5         | 0.35888175 | 48.49753 | -4.412536679 |
| 3.00      | 7922      | 2429     | 58.6         | 0.30661449 | 41.43439 | -4.569938411 |
| 3.50      | 6982      | 1874     | 63.7         | 0.26840447 | 36.27087 | -4.703034586 |
| 4.00      | 6229      | 1445     | 68.7         | 0.23197945 | 31.34857 | -4.848880846 |
| 4.50      | 6858      | 1533     | 69.8         | 0.22353456 | 30.20737 | -4.885963615 |
| 5.00      | 7203      | 1352     | 74.6         | 0.18769957 | 25.36481 | -5.06068699  |
| 6.00      | 6642      | 972      | 80.2         | 0.14634146 | 19.77587 | -5.309586959 |
| 7.00      | 7180      | 900      | 83.1         | 0.12534819 | 16.93894 | -5.46443426  |
| 8.00      | 7589      | 943      | 83.2         | 0.1242588  | 16.79173 | -5.473163188 |
| 9.00      | 7279      | 799      | 85.2         | 0.10976783 | 14.83349 | -5.597162185 |
| 10.00     | 6088      | 551      | 87.8         | 0.09050591 | 12.23053 | -5.790114452 |

**Table S41** 5% Ti, 2% TEMPO, 0.025 M Proteated – Run 1

| Time (min) | Area Ph2O | Area SUB | % Conversion | Asub/AIS   | %SM      | Ln[SM]    |
|------------|-----------|----------|--------------|------------|----------|-----------|
| 0.00       | 5561      | 4113     | 0.0          | 0.73961518 | 100      | -3.688879 |
| 0.50       | 5887      | 3400     | 22.0         | 0.57754374 | 78.04645 | -3.936745 |
| 1.00       | 6846      | 3578     | 29.4         | 0.52264096 | 70.62716 | -4.036635 |
| 1.50       | 7011      | 3100     | 40.2         | 0.44216232 | 59.75166 | -4.203853 |
| 2.00       | 5597      | 2213     | 46.6         | 0.39539039 | 53.43113 | -4.315656 |
| 2.50       | 6165      | 2070     | 54.6         | 0.33576642 | 45.37384 | -4.479114 |
| 3.00       | 8280      | 2400     | 60.8         | 0.28985507 | 39.1696  | -4.626149 |
| 3.50       | 5953      | 1577     | 64.2         | 0.26490845 | 35.79844 | -4.716145 |
| 4.00       | 6007      | 1329     | 70.1         | 0.22124188 | 29.89755 | -4.896273 |
| 4.50       | 6920      | 1270     | 75.2         | 0.18352601 | 24.80081 | -5.083173 |
| 5.00       | 7567      | 1200     | 78.6         | 0.15858332 | 21.43018 | -5.229249 |
| 6.00       | 7213      | 1000     | 81.3         | 0.13863857 | 18.73494 | -5.363659 |
| 7.00       | 6854      | 800      | 84.2         | 0.11672016 | 15.773   | -5.53575  |
| 8.00       | 6594      | 700      | 85.7         | 0.10615711 | 14.34556 | -5.630609 |
| 9.00       | 7727      | 650      | 88.6         | 0.08412062 | 11.36765 | -5.863278 |
| 10.00      | 6655      | 600      | 87.8         | 0.09015778 | 12.18348 | -5.793968 |

**Table S42** 5% Ti, 2% TEMPO, 0.025 M Proteated – Run 2

| Time (min) | Area Ph2O | Area SUB | % Conversion | Asub/AIS   | %SM      | Ln[SM]    |
|------------|-----------|----------|--------------|------------|----------|-----------|
| 0.00       | 6132      | 4687     | 0.0          | 0.76435095 | 100      | -3.688879 |
| 0.50       | 6411      | 3800     | 19.9         | 0.59273124 | 80.09882 | -3.910789 |
| 1.00       | 6896      | 3606     | 29.3         | 0.52291183 | 70.66376 | -4.036117 |
| 1.50       | 5593      | 2410     | 41.8         | 0.43089576 | 58.22916 | -4.229663 |
| 2.00       | 6212      | 2148     | 53.3         | 0.34578236 | 46.72735 | -4.44972  |
| 2.50       | 5802      | 1680     | 60.9         | 0.28955533 | 39.1291  | -4.627183 |
| 3.00       | 6318      | 1565     | 66.5         | 0.24770497 | 33.47364 | -4.783291 |
| 3.50       | 6041      | 1439     | 67.8         | 0.2382056  | 32.18995 | -4.822395 |
| 4.00       | 5456      | 1134     | 71.9         | 0.20784457 | 28.0871  | -4.958739 |
| 4.50       | 6749      | 1250     | 75.0         | 0.18521262 | 25.02873 | -5.074025 |
| 5.00       | 6904      | 1180     | 76.9         | 0.17091541 | 23.09668 | -5.154361 |
| 6.00       | 6074      | 890      | 80.2         | 0.14652618 | 19.80083 | -5.308326 |
| 7.00       | 7181      | 890      | 83.3         | 0.12393817 | 16.7484  | -5.475747 |
| 8.00       | 6843      | 764      | 84.9         | 0.11164694 | 15.08742 | -5.580188 |
| 9.00       | 6153      | 599      | 86.8         | 0.09735089 | 13.15553 | -5.717208 |
| 10.00      | 6215      | 508      | 89.0         | 0.08173773 | 11.04564 | -5.892014 |

**Table S43** 5% Ti, 2% TEMPO, 0.025 M Proteated – Run 3

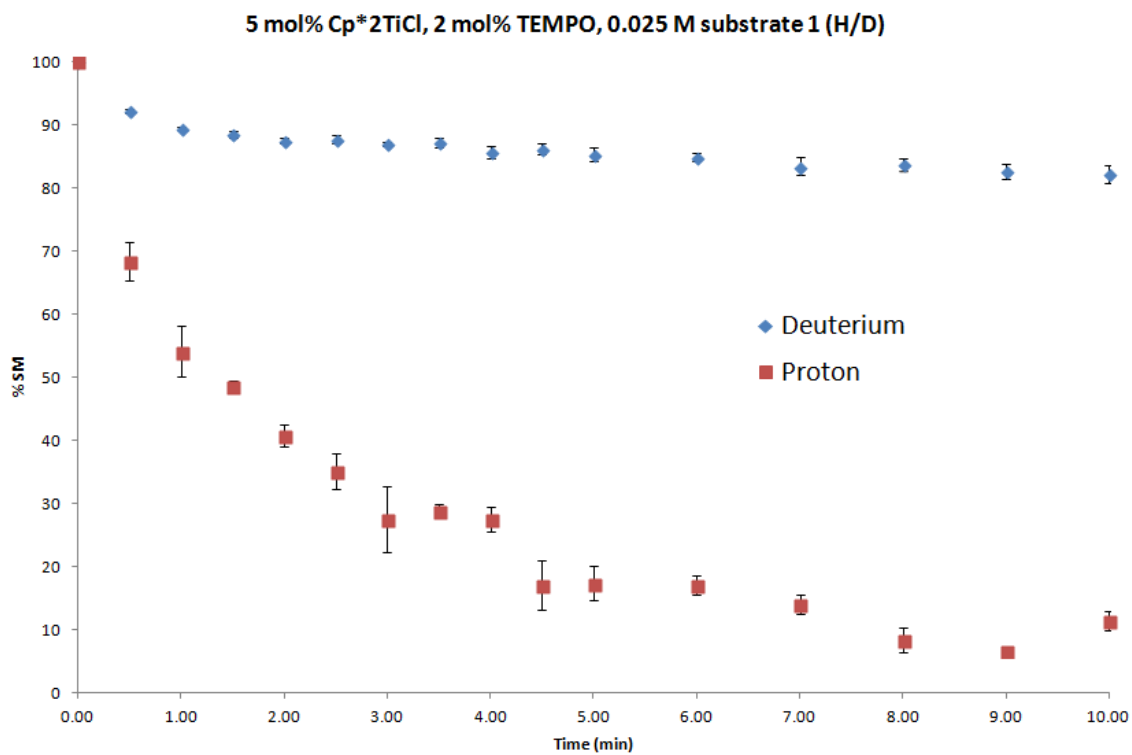

**Figure S25** Chart comparing %yield of product vs time using 5 mol% Cp\*2TiCl<sub>4</sub>, 2 mol% TEMPO, 0.025 M substrate **1** (N-H and N-D isotopologs). The deuterium dataset is the average of 4 runs (Tables S37 – S40), the proton dataset is the average of 3 runs (Tables S41 – S43). Error bars were calculated by the standard error of the means {standard deviation / sqrt (number of expts)}.

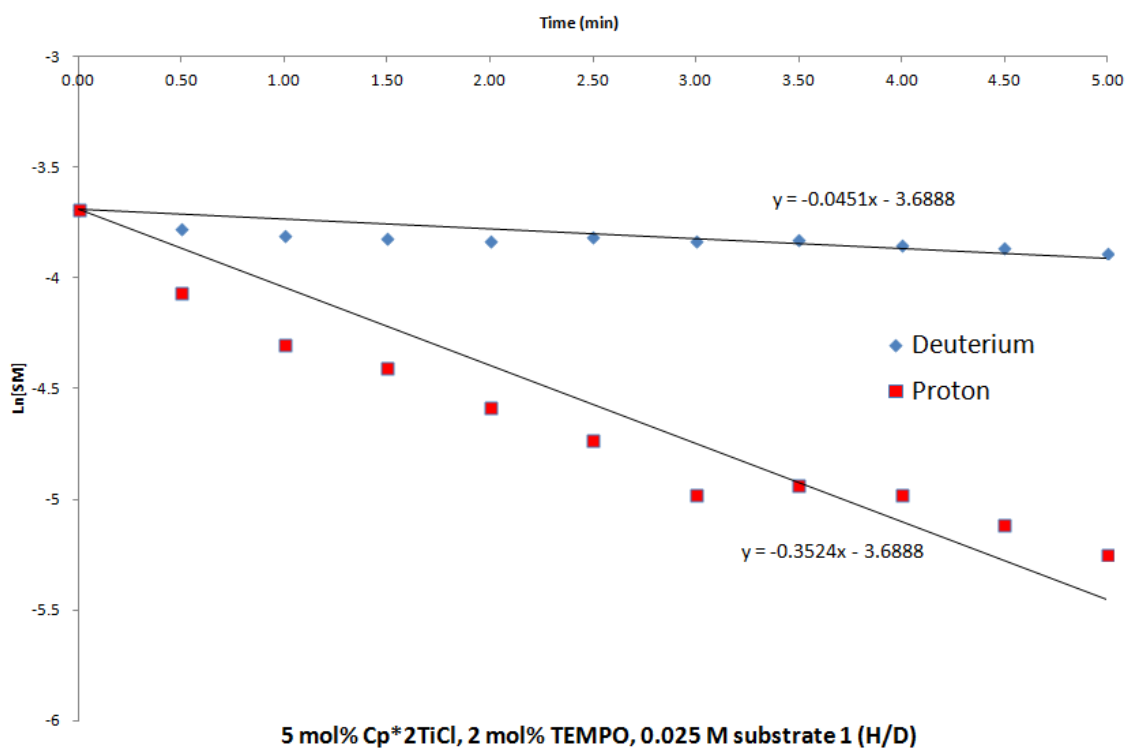

**Figure S26** Ln[SM] vs time. Reactions run with 5 mol% Cp\*2TiCl, 2 mol% TEMPO, 0.025 M substrate **1** (N-H and N-D isotopologs). The deuterium dataset is the average of 4 runs (Tables S37 – S40), the proton dataset is the average of 3 runs (Tables S41 – S43). The slopes of these plots are  $k_{\text{obs}}$  and are used to calculate the KIE (S105)



The KIE was obtained by taking the ratio of  $k_{\text{obs}}$  for the proteated and deuterated isotopologs of **1** obtained through independent kinetic experiments using 5 mol% Cp\*<sub>2</sub>TiCl<sub>4</sub> and 2 mol% TEMPO at 0.025 M in MeCN at 23 °C (See tables S37 – S43 for raw data, Figs. S25, S26 for averages).  $k_{\text{obs}}$  was calculated independently for each kinetic experiment by calculating the slope from the plot of Ln[SM] vs time. The error of the slopes was calculated by LINEST analysis. The data is shown below. The error in the average slopes and in the KIE was calculated by standard propagation of error methods.

---

$$k_{\text{H}} = [(k_{\text{obs(run 1)}} \pm \text{error}) + (k_{\text{obs(run 2)}} \pm \text{error}) + (k_{\text{obs(run 3)}} \pm \text{error})] / (3 \pm 0)$$

$$k_{\text{H}} = [(-0.26 \pm 0.01) + (-0.308 \pm 0.004) + (-0.322 \pm 0.009)] / (3 \pm 0)$$

$$k_{\text{Haverage}} = (-0.92 \pm 0.02) / (3 \pm 0)$$

$$k_{\text{Haverage}} = -0.305 \pm 0.007$$

---

$$k_{\text{D}} = [(k_{\text{obs(run 1)}} \pm \text{error}) + (k_{\text{obs(run 2)}} \pm \text{error}) + (k_{\text{obs(run 3)}} \pm \text{error}) + (k_{\text{obs(run 4)}} \pm \text{error})] / (4 \pm 0)$$

$$k_{\text{D}} = [(-0.034 \pm 0.007) + (-0.050 \pm 0.004) + (-0.043 \pm 0.004) + (-0.041 \pm 0.005)] / (4 \pm 0)$$

$$k_{\text{Daverage}} = (-0.168 \pm 0.02) / (4 \pm 0)$$

$$k_{\text{Daverage}} = -0.042 \pm 0.005$$

---

$$\text{KIE} = k_{\text{H}}/k_{\text{D}}$$

$$\text{KIE} = (-0.305 \pm 0.007) / (-0.042 \pm 0.005)$$

$$\text{KIE} = 7 \pm 1$$

## VI. DFT Computational Information

### Computational Details

All calculations used DFT methodology<sup>5</sup> as implemented in the Gaussian 09 series of computer programs.<sup>6</sup> We employed the unrestricted B3LYP functional.<sup>7-11</sup> All-electron, split-valence double- $\zeta$  plus polarization function 6-31G(d) basis sets were used.<sup>12-15</sup> For some calculations, the LANL2DZ basis set which includes a relativistic effective core potential developed by Hay and Wadt and includes a double- $\zeta$  basis set was employed.<sup>16</sup> Where applicable, solvation is described using the CPCM polarizable conductor calculation model designating acetonitrile as the solvent;<sup>17</sup> otherwise calculations were performed in the gas phase. All complexes underwent geometry optimization, and stationary points were subjected to normal mode analysis.

- 
- (5) Parr, R. G.; Yang, W. *Density-Functional Theory of Atoms and Molecules*; University Press: Oxford, 1989.
  - (6) Gaussian 09, Revision C.01, Frisch, M. J. T., G. W.; Schlegel, H. B.; Scuseria, G. E.; Robb, M. A.; Cheeseman, J. R.; Scalmani, G.; Barone, V.; Mennucci, B.; Petersson, G. A.; Nakatsuji, H.; Caricato, M.; Li, X.; Hratchian, H. P.; Izmaylov, A. F.; Bloino, J.; Zheng, G.; Sonnenberg, J. L.; Hada, M.; Ehara, M.; Toyota, K.; Fukuda, R.; Hasegawa, J.; Ishida, M.; Nakajima, T.; Honda, Y.; Kitao, O.; Nakai, H.; Vreven, T.; Montgomery, Jr., J. A.; Peralta, J. E.; Ogliaro, F.; Bearpark, M.; Heyd, J. J.; Brothers, E.; Kudin, K. N.; Staroverov, V. N.; Keith, T.; Kobayashi, R.; Normand, J.; Raghavachari, K.; Rendell, A.; Burant, J. C.; Iyengar, S. S.; Tomasi, J.; Cossi, M.; Rega, N.; Millam, N. J.; Klene, M.; Knox, J. E.; Cross, J. B.; Bakken, V.; Adamo, C.; Jaramillo, J.; Gomperts, R.; Stratmann, R. E.; Yazyev, O.; Austin, A. J.; Cammi, R.; Pomelli, C.; Ochterski, J. W.; Martin, R. L.; Morokuma, K.; Zakrzewski, V. G.; Voth, G. A.; Salvador, P.; Dannenberg, J. J.; Dapprich, S.; Daniels, A. D.; Farkas, Ö.; Foresman, J. B.; Ortiz, J. V.; Cioslowski, J.; Fox, D. J., Gaussian, Inc., Wallingford, CT.
  - (7) Parr, R. G.; Yang, W. *Annu. Rev. Phys. Chem.* **1995**, *46*, 701.
  - (8) Stephens, P. J.; Devlin, F. J.; Chabalowski, C. F.; Frisch, M. J. *J. Phys. Chem.* **1994**, *98*, 11623.
  - (9) Lee, C.; Yang, W.; Parr, R. G. *Phys. Rev. B* **1988**, *37*, 785.
  - (10) Becke, A. D. *Phys. Rev. A* **1988**, *38*, 3098.
  - (11) Becke, A. D. *J. Chem. Phys.* **1993**, *98*, 5648.
  - (12) Clark, T.; Chandrasekhar, J.; Spitznagel, G. W.; Schleyer, P. v. R. *J. Comput. Chem.* **1983**, *4*, 294.
  - (13) Hariharan, P. C.; Pople, J. A. *Mol. Phys.* **1974**, *27*, 209
  - (14) Ditchfield, R.; Hehre, W. J.; Pople, J. A. *J. Chem. Phys.* **1971**, *54*, 724.
  - (15) Krishnan, R.; Binkley, J. S.; Seeger, R.; Pople, J. A. *J. Chem. Phys.* **1980**, *72*, 650.
  - (16) (a) Hay, P.J.; Wadt, W.R. *J. Chem. Phys.*, **1985**, *82*, 270-283. (b) Hay, P.J.; Wadt, W.R. *J. Chem. Phys.*, **1985**, *82*, 299-310. (c) Wadt, W.R.; Hay, P.J. *J. Chem. Phys.*, **1985**, *82*, 284-298.
  - (17) (a) Barone, V.; Cossi, M. *J. Phys. Chem. A.*, **1998**, *102*, 1995. (b) Cossi, M.; Rega, N.; Scalmani, G.; Barone, V. *J. Comp. Chem.*, **2003**, *24*, 669.

**Table S44:** Thermodynamic parameters; for entries 1 – 14 and 41 – 44, geometries and frequencies were calculated with UB3LYP/6-31G(d) in all cases except for Cp\*<sub>2</sub>TiCl-Methyl *N*-phenylcarbamate, which was optimized at UB3LYP/6-31G and subject to a subsequent frequency calculation at UB3LYP/6-31G(d). Entries 15-22 were calculated treating all atoms at UB3LYP/6-31G(d) except for titanium, which was treated with UB3LYP/LANL2DZ. Entries 23-40 are calculated the same level of theory as 1-14 with exception of the addition of the CPCM (solvent = acetonitrile) solvation model. Energies are given in hartree particle<sup>-1</sup>.

| Entry                                     | Job Name                                            | E+ZPE        | G            | H            | S       |
|-------------------------------------------|-----------------------------------------------------|--------------|--------------|--------------|---------|
| 1                                         | <i>N</i> -phenyl propanamide                        | -479.395171  | -479.432628  | -479.383862  | 102.637 |
| 2                                         | <i>N</i> -phenyl propanamidyl radical               | -478.753041  | -478.790670  | -478.741793  | 102.871 |
| 3                                         | Methyl <i>N</i> -phenylcarbamate                    | -515.329375  | -515.365746  | -515.318413  | 99.620  |
| 4                                         | Methyl <i>N</i> -phenylcarbanyl radical             | -514.686035  | -514.722956  | -514.675243  | 100.421 |
| 5                                         | TEMPO                                               | -483.456450  | -483.493199  | -483.443466  | 104.672 |
| 6                                         | Cp* <sub>2</sub> Ti <sup>III</sup> Cl               | -2089.520656 | -2089.577003 | -2089.491607 | 179.732 |
| 7                                         | Cp* <sub>2</sub> Ti <sup>IV</sup> Cl-TEMPO          | -2572.970135 | -2573.036017 | -2572.928550 | 225.551 |
| 8                                         | Cp* <sub>2</sub> Ti <sup>III</sup> Cl-amide         | -2568.912610 | -2568.984186 | -2568.871884 | 233.807 |
| 9                                         | Cp* <sub>2</sub> Ti <sup>IV</sup> Cl-azaenolate     | -2568.326993 | -2568.395384 | -2568.287094 | 227.914 |
| 10                                        | Cp* <sub>2</sub> Ti <sup>III</sup> Cl-carbamate     | -2604.836304 | -2604.905329 | -2604.795852 | 230.414 |
| 11                                        | Cp* <sub>2</sub> Ti <sup>IV</sup> Cl-carbazaenolate | -2604.258278 | -2604.326757 | -2604.218635 | 227.562 |
| 12                                        | Cp <sub>2</sub> Ti <sup>III</sup> Cl                | -1696.638602 | -1696.679639 | -1696.626365 | 112.123 |
| 13                                        | Cp <sub>2</sub> Ti <sup>IV</sup> Cl-TEMPO           | -2180.122650 | -2180.173505 | -2180.097702 | 159.541 |
| 14                                        | TEMPOH                                              | -484.050688  | -484.086313  | -484.037641  | 102.439 |
| <b>LANL2DZ Jobs</b>                       |                                                     |              |              |              |         |
| 15                                        | Cp* <sub>2</sub> Ti <sup>III</sup> Cl               | -1298.163586 | -1298.220037 | -1298.134471 | 180.090 |
| 16                                        | Cp* <sub>2</sub> Ti <sup>IV</sup> Cl-TEMPO          | -1781.602205 | -1781.668502 | -1781.560767 | 226.748 |
| 17                                        | Cp* <sub>2</sub> Ti <sup>III</sup> Cl-amide         | -1777.527720 | -1777.619055 | -1777.506958 | 235.928 |
| 18                                        | Cp* <sub>2</sub> Ti <sup>IV</sup> Cl-azaenolate     | -1776.957255 | -1777.025892 | -1776.917210 | 228.740 |
| 19                                        | Cp* <sub>2</sub> Ti <sup>III</sup> Cl-carbamate     | -1813.466497 | -1813.536870 | -1813.426052 | 233.234 |
| 20                                        | Cp* <sub>2</sub> Ti <sup>IV</sup> Cl-carbazaenolate | -1812.887399 | -1812.955703 | -1812.847722 | 227.265 |
| 21                                        | Cp <sub>2</sub> Ti <sup>III</sup> Cl                | -905.288895  | -905.326301  | -905.277527  | 102.654 |
| 22                                        | Cp <sub>2</sub> Ti <sup>IV</sup> Cl-TEMPO           | -1388.760424 | -1388.811318 | -1388.735415 | 159.752 |
| Entry                                     | Job Name                                            | E+ZPE        | G            | H            | S       |
| <b>CPCM Jobs (Solvent = Acetonitrile)</b> |                                                     |              |              |              |         |
| 23                                        | <i>N</i> -phenyl propanamide                        | -479.404590  | -479.442034  | -479.393259  | 102.656 |
| 24                                        | <i>N</i> -phenyl propanamidyl radical               | -478.760870  | -478.798749  | -478.749575  | 103.495 |
| 25                                        | Methyl <i>N</i> -phenylcarbamate                    | -515.337573  | -515.374528  | -515.326530  | 101.020 |
| 26                                        | Methyl <i>N</i> -phenylcarbanyl radical             | -514.694928  | -514.731904  | -514.684112  | 100.587 |
| 27                                        | TEMPO                                               | -483.461947  | -483.498652  | -483.448961  | 104.583 |
| 28                                        | Cp* <sub>2</sub> Ti <sup>III</sup> Cl               | -2089.531049 | -2089.587055 | -2089.501925 | 179.171 |
| 29                                        | Cp* <sub>2</sub> Ti <sup>IV</sup> Cl-TEMPO          | -2572.978018 | -2573.044012 | -2572.936624 | 226.019 |
| 30                                        | Cp* <sub>2</sub> Ti <sup>III</sup> Cl-amide         | -2568.928292 | -2568.998805 | -2568.887663 | 233.917 |
| 31                                        | Cp* <sub>2</sub> Ti <sup>IV</sup> Cl-azaenolate     | -2568.339036 | -2568.408065 | -2568.298920 | 229.715 |

|                                                                                 |                                                      |              |              |              |         |
|---------------------------------------------------------------------------------|------------------------------------------------------|--------------|--------------|--------------|---------|
| 32                                                                              | Cp* <sub>2</sub> Ti <sup>III</sup> Cl-carbamate      | -2604.851645 | -2604.921991 | -2604.811058 | 233.480 |
| 33                                                                              | Cp* <sub>2</sub> Ti <sup>IV</sup> Cl-carbazaenolate  | -2604.272153 | -2604.341402 | -2604.232226 | 229.779 |
| 34                                                                              | Cp <sub>2</sub> Ti <sup>III</sup> Cl                 | -1696.651225 | -1696.690550 | -1696.638970 | 108.558 |
| 35                                                                              | Cp <sub>2</sub> Ti <sup>IV</sup> Cl-TEMPO            | -2180.133521 | -2180.184514 | -2180.108484 | 160.019 |
| 36                                                                              | TEMPOH                                               | -484.054477  | -484.090159  | -484.041378  | 102.669 |
| 37                                                                              | Cp* <sub>2</sub> Ti <sup>III</sup> Cl-ester          | -2397.113294 | -2397.180238 | -2397.075618 | 220.190 |
| 38                                                                              | Cp* <sub>2</sub> Ti <sup>IV</sup> Cl-esterenolate    | -2396.501910 | -2396.566425 | -2396.464952 | 84.672  |
| 39                                                                              | Methyl propionate                                    | -307.589501  | -307.621368  | -307.581138  | 84.672  |
| 40                                                                              | Methyl propionate radical                            | -306.948674  | -306.980632  | -306.940374  | 84.731  |
| <b>Other Gas Phase Calculations</b>                                             |                                                      |              |              |              |         |
| 41                                                                              | <i>N</i> -phenyl propanamide - BF <sub>3</sub>       | -803.957459  | -804.001082  | -803.942100  | 124.137 |
| 42                                                                              | <i>N</i> -phenyl propanamidyl rad. - BF <sub>3</sub> | -803.313592  | -803.25786   | -803.298223  | 125.516 |
| 43                                                                              | Cp* <sub>2</sub> Ti <sup>III</sup> Cl – MeCN         | -2222.23391  | -2222.296788 | -2222.199911 | 203.895 |
| 44                                                                              | Cp <sub>2</sub> Ti <sup>III</sup> Cl – MeCN          | -1829.257744 | -1829.404347 | -1829.340499 | 124.379 |
| <b>Other Solvated Calculations (Solvation = CPCM with Acetonitrile Solvent)</b> |                                                      |              |              |              |         |
| 45                                                                              | Cp* <sub>2</sub> Ti <sup>III</sup> Cl – MeCN         | -2222.25132  | -2222.312946 | -2222.217664 | 200.538 |
| 46                                                                              | MeCN                                                 | -132.717002  | -132.739660  | -132.712486  | 57.823  |

**Figure S27.** Isodesmic reactions used for our thermochemical analyses of bond weakening. Explicit calculations are shown below in Table S45.

**A. Direct H-atom transfer**

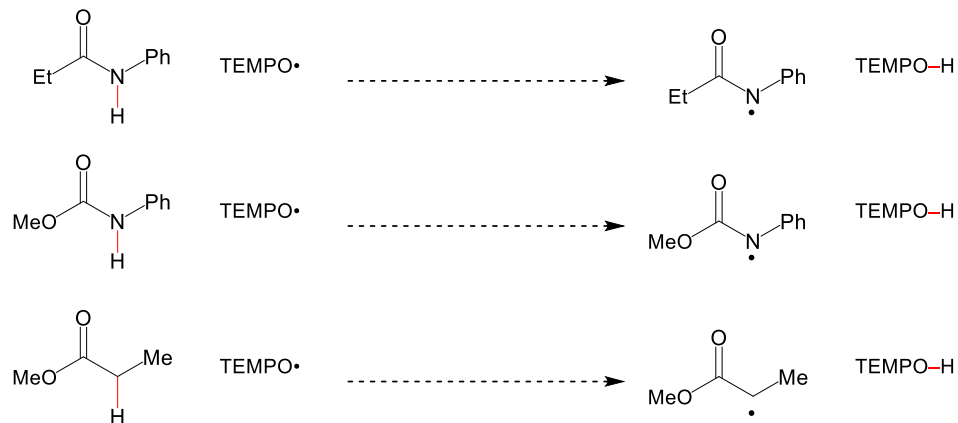

**B. Complexation-induced bond weakening**

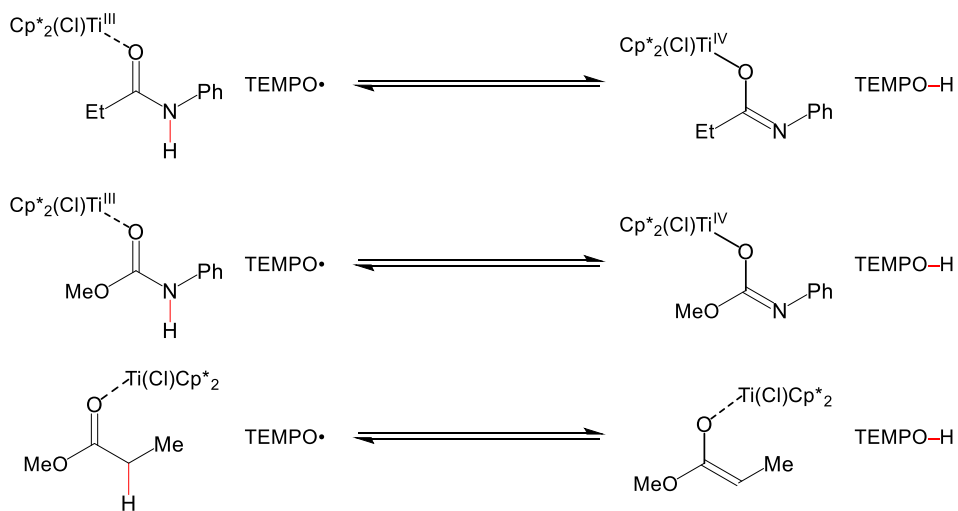

**C. Isodesmic estimation of the Ti-O BDFE in  $\text{Cp}^*_2\text{TiCl}$ -TEMPO**

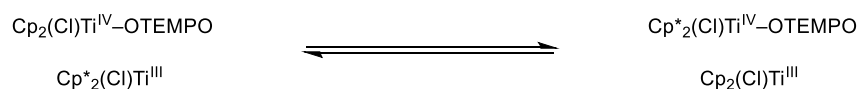

**D. Titanium-Enolate Ti-O BDFE in  $\text{Cp}^*_2\text{TiCl}$ -Methyl propionate enolate**

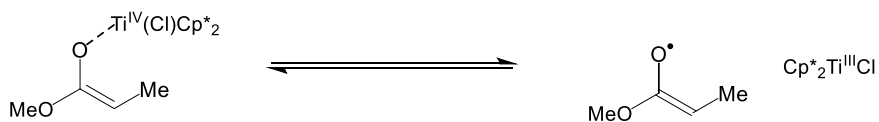

**Table S45.** Analysis of the reactions above. Energies are provided in kcal mol<sup>-1</sup> using the conversion factor 627.51 kcal mol<sup>-1</sup> per hartree and are rounded off after the third decimal place. Entropies are provided in e.u. and are rounded off after the third decimal place.

| Rxn                                                                 | Entries for $\Delta$ | $\Delta E+ZPE$ | $\Delta G$ | $\Delta H$ | $\Delta S$ |
|---------------------------------------------------------------------|----------------------|----------------|------------|------------|------------|
| <b>6-31G(d) -- Gas Phase</b>                                        |                      |                |            |            |            |
| A-Amide                                                             | =(2+14)-(1+5)        | 30.053         | 30.650     | 30.054     | -1.999     |
| A-Carbamate                                                         | =(4+14)-(3+5)        | 30.812         | 31.172     | 30.745     | -1.432     |
| B-Amide                                                             | =(9+14)-(5+8)        | -5.410         | -2.706     | -5.889     | -10.680    |
| B-Carbamate                                                         | =(11+14)-(5+10)      | -10.173        | -9.125     | -10.641    | -5.085     |
| C                                                                   | =(7+12)-(6+13)       | 21.692         | 21.870     | 21.394     | -1.599     |
| C (Explicit MeCN)                                                   | =(7+44)-(13+43)      | 17.998         | 18.781     | 17.736     | -3.506     |
| <b>LANL2DZ on Titanium, 6-31G(d) on all other atoms – Gas Phase</b> |                      |                |            |            |            |
| B-Amide                                                             | =(18+14)-(5+17)      | -2.368         | 0.031      | -2.778     | -9.421     |
| B-Carbamate                                                         | =(20+14)-(19+5)      | -9.501         | -7.500     | -9.943     | -8.202     |
| C                                                                   | =(16+21)-(15+22)     | 20.651         | 22.937     | 19.824     | -10.44     |
| <b>6-31G(d) – CPCM (Solvent = Acetonitrile)</b>                     |                      |                |            |            |            |
| A-Amide                                                             | =(24+36)-(23+27)     | 32.122         | 32.491     | 32.171     | -1.075     |
| A-Carbamate                                                         | =(26+36)-(25+27)     | 31.448         | 32.076     | 31.376     | -2.347     |
| A-Ester                                                             | =(40+36)-(39+27)     | 30.307         | 30.892     | 30.338     | -1.855     |
| B-Amide                                                             | =(31+36)-(30+27)     | -2.054         | -0.481     | -2.305     | -6.116     |
| B-Carbamate                                                         | =(33+36)-(32+27)     | -8.181         | -6.851     | -8.525     | -5.615     |
| B-Ester                                                             | =(38+36)-(37+27)     | 11.831         | 13.997     | 30.338     | -1.855     |
| C                                                                   | =(29+34)-(28+35)     | 22.168         | 23.222     | 21.847     | -4.613     |
| D                                                                   | =(38)-(40+28)        | 13.923         | -0.792     | 14.215     | 50.335     |

### Titanium-TEMPO BDFE (Figure S27, Reaction C)

Using the value of 25 kcal mol<sup>-1</sup> for the Cp<sub>2</sub>TiCl-TEMPO BDFE (cf. reference 9(a) in the main text), we can estimate that the Cp\*<sub>2</sub>TiCl-TEMPO BDFE is 3.3 kcal mol<sup>-1</sup> or 2.1 kcal mol<sup>-1</sup> using the  $\Delta G$  value from the table above for 6-31G(d) and LANL2DZ entries for Reaction C respectively. Using the solvation model CPCM, this value is 1.8 kcal mol<sup>-1</sup>. If MeCN is explicitly bound (Entires 43 and 44) to the titanium, this value can be estimated as 6.2 kcal mol<sup>-1</sup>.

Computed values for the bond weakening of *N*-phenyl propanamide and Methyl *N*-phenylcarbamate can be furnished by taking the  $\Delta\Delta$  of the Reactions A and B above; the results are shown below:

| Quantity                                        | $\Delta\Delta E+ZPE$ | $\Delta\Delta G$ | $\Delta\Delta H$ | $\Delta\Delta S$ |
|-------------------------------------------------|----------------------|------------------|------------------|------------------|
| <b>6-31G(d) Only – Gas Phase</b>                |                      |                  |                  |                  |
| Amide Bond Weakening                            | 35.462               | 33.356           | 35.943           | 8.681            |
| Carbamate Bond Weakening                        | 40.985               | 40.297           | 41.386           | 3.653            |
| <b>6-31G(d) – CPCM (Solvent = Acetonitrile)</b> |                      |                  |                  |                  |
| Amide Bond Weakening                            | 34.177               | 32.973           | 34.476           | 5.041            |

|                                                                     |        |        |        |       |
|---------------------------------------------------------------------|--------|--------|--------|-------|
| Carbamate Bond Weakening                                            | 39.629 | 38.928 | 39.901 | 3.268 |
| Ester Bond Weakening                                                | 18.476 | 16.894 | 18.887 | 6.682 |
| <b>LANL2DZ on Titanium, 6-31G(d) on all other atoms – Gas Phase</b> |        |        |        |       |
| Amide Bond Weakening                                                | 32.420 | 30.619 | 32.832 | 7.422 |
| Carbamate Bond Weakening                                            | 40.312 | 38.669 | 40.688 | 6.770 |

### **Bond Weakening of Carbamates and Amides (cf. Figure S27 B)**

Taking a value of 98 kcal mol<sup>-1</sup> as the BDFE of the N-H bond in *N*-phenyl propanamide and Methyl *N*-phenylcarbamate, tabulated  $\Delta G$  values at 6-31G(d) predicts amide and carbamate BDFEs of ~63 and ~57 kcal mol<sup>-1</sup> respectively. Using the  $\Delta G$  values furnished from the 6-31G(d)/LANL2DZ jobs, the BDFEs predicted for amides and carbamates are ~66 and ~58 kcal mol<sup>-1</sup> respectively. Adding a CPCM solvent model to the 6-31G(d) level of theory furnishes ~65 and ~59 kcal mol<sup>-1</sup> respectively for amides and carbamates. All three are in excellent agreement.

### **PCET to the Titanium Enolate Complex (cf. Figure S27 B)**

A reviewer proposed concerted PCET from TEMPO-H to the titanium-bound ester enolate as means to regenerate TEMPO• and the active Ti(II) catalyst. Using the same thermochemical analysis at the 6-31G(d) level of theory with a CPCM (solvent = acetonitrile) solvation model, we estimate that the ester C-H BDFE is weakened by 17 kcal mol<sup>-1</sup>. Using a BDFE of ~96 (based on that of ethyl propionate) for the alpha C-H bond, we estimate a weakened ester C-H BDFE of about 79 kcal mol<sup>-1</sup>. Using 67 kcal mol<sup>-1</sup> for the O-H BDFE of TEMPO-H, based solely on differential BDFEs this process should be 12 kcal mol<sup>-1</sup> favorable. This is in excellent agreement with our DFT estimate (Isodesmic Reaction B, Ester, CPCM model included).

### **Titanium-Enolate Homolysis and Abstraction from TEMPO-H (cf. Figure S27 D)**

The reviewers also indicated that it's possible the titanium-bound ester enolate proposed at the end of our catalytic cycle could also homolyze and do an H-atom transfer to TEMPO-H in solution. The calculated BDE ( $\Delta E$ ) from that process is ~14 kcal mol<sup>-1</sup>. While we favor the idea of concerted PCET given its favorability (approx. 12 kcal mol<sup>-1</sup> favorable, *vide supra*) and that it avoids the generation of the high-energy enolate radical, we cannot definitively rule out the homolysis-abstraction pathway and consequently present it as an alternative mechanism.

Computations on titanium complexes of this sort have been done at both the 6-31G(d) and 6-31G(d)/LANL2DZ basis sets by Waymouth (ref. 8(a) in the main text) and Cuerva<sup>18</sup> respectively. We evaluated both methods on our complexes and found that both furnish energies in reasonable accord with each other; given both precedent and our results we believe both accurately describe the species studied in this work.

---

(18) Paradas, M.; Campana, A.G.; Jimenez, T.; Robles, R.; Oltra, J.E.; Bunuél, E.; Justica, J.; Cardenas, D.J.; Cuerva, J.M. *J. Am. Chem. Soc.*, **2010**, *132*, 12748.

## Lewis Acidity is Not Responsible for Bond Weakening

**Figure S28:** Evaluation of the N-H BDFE of the BF<sub>3</sub>-adduct of *N*-phenyl propanamide as well as binding of the amide substrate.

A. Lewis Acid Induced Bond Weakening ( UB3LYP / 6-31G(d) ) - Gas Phase

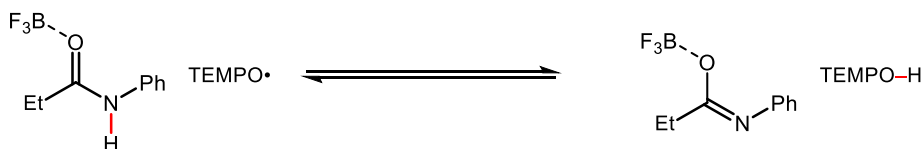

B. Solvent Exchange Thermochemistry ( UB3LYP / 6-31G(d) - CPCM = MeCN )

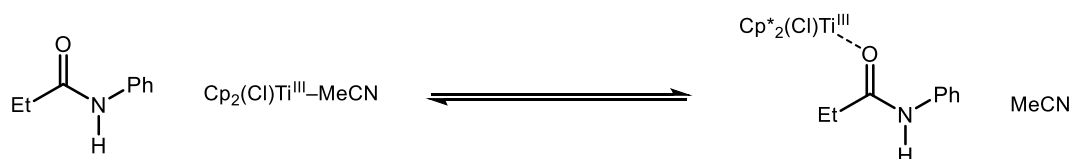

**Table S46.** Analysis of the reaction above. Energies are provided in kcal mol<sup>-1</sup> using the conversion factor 627.51 kcal mol<sup>-1</sup> per hartree and are rounded off after the third decimal place. Entropies are provided in e.u. and are rounded off after the third decimal place.

| Rxn                                             | Entries for $\Delta$ | $\Delta E+ZPE$ | $\Delta G$ | $\Delta H$ | $\Delta S$ |
|-------------------------------------------------|----------------------|----------------|------------|------------|------------|
| <b>6-31G(d) -- Gas Phase</b>                    |                      |                |            |            |            |
| A from Fig. S28                                 | =(14+42)-(5+41)      | 31.143         | 31.443     | 31.189     | -0.854     |
| <b>6-31G(d) – CPCM (Solvent = Acetonitrile)</b> |                      |                |            |            |            |
| B from Fig. S28                                 | =(30+46)-(23+45)     | 6.662          | 10.175     | 6.761      | -11.454    |

A reviewer suggested that strictly Lewis acidity, responsible for a decrease of the pK<sub>a</sub> of alpha protons upon binding to a carbonyl group, could also be the root source for bond weakening in these complexes. To examine this effect we calculated the estimated BDFE of the BF<sub>3</sub>-adduct of *N*-phenyl propanamide. This reaction is significantly uphill (~31 kcal mol<sup>-1</sup>) and demonstrates a slight *increase* of the BDFE (Table S27, A-Amide) by ~1.1 kcal mol<sup>-1</sup> to furnish an effective BDFE of 99 kcal mol<sup>-1</sup> (Figure S28, A and Table S46). We believe this supports our claim that only a *redox active* Lewis acid is competent to affect bond weakening in the appropriate substrates.

Another reviewer pointed out that we should include the energy of the amide binding to the titanium species. We calculated the thermodynamics of exchange between a discrete acetonitrile molecule and *N*-phenyl propanamide (Figure S28, B.) to the Cp\*<sub>2</sub>TiCl species: this is calculated to be endergonic by 6.8, 10.2, and 6.7 kcal mol<sup>-1</sup> for  $\Delta E$ ,  $\Delta G$ , and  $\Delta H$  respectively (Table S46).



**S47:** Optimized geometries in Cartesian coordinates (Å) and energies (hartree) for stationary points. All energies and frequencies calculated at UB3LYP/6-31G(d); all geometries optimized at UB3LYP/6-31G except for Cp\*<sub>2</sub>TiCl-Methyl *N*-phenylcarbamate, which was optimized at UB3LYP/6-31G with frequencies calculated at UB3LYP/6-31G(d).

***N*-phenyl propanamide (Entry 1)**

|                                              |             |
|----------------------------------------------|-------------|
| E (UB3LYP)                                   | -479.579852 |
| Zero-point correction=                       | 0.184681    |
| Thermal correction to Energy=                | 0.195046    |
| Thermal correction to Enthalpy=              | 0.195990    |
| Thermal correction to Gibbs Free Energy=     | 0.147224    |
| Sum of electronic and zero-point Energies=   | -479.395171 |
| Sum of electronic and thermal Energies=      | -479.384806 |
| Sum of electronic and thermal Enthalpies=    | -479.383862 |
| Sum of electronic and thermal Free Energies= | -479.432628 |

Charge = 0; Multiplicity = 1

|   |             |             |             |
|---|-------------|-------------|-------------|
| C | 0.78975300  | 0.29880600  | -0.01463900 |
| C | 1.21392800  | -1.03906700 | -0.02020400 |
| C | 1.74600500  | 1.32603200  | 0.03200400  |
| C | 2.57948000  | -1.32223300 | 0.01938400  |
| H | 0.47790000  | -1.82953700 | -0.05481200 |
| N | -0.56873000 | 0.68228800  | -0.05262100 |
| C | 3.10462200  | 1.02579700  | 0.07163000  |
| H | 1.42059600  | 2.36506100  | 0.03665600  |
| C | 3.53164200  | -0.30330600 | 0.06534100  |
| H | 2.89794100  | -2.36146200 | 0.01439100  |
| C | -1.69755300 | -0.10571800 | -0.12648000 |
| H | -0.72640200 | 1.68107600  | -0.04644300 |
| H | 3.82895700  | 1.83518000  | 0.10710200  |
| H | 4.59126600  | -0.54010200 | 0.09624900  |
| C | -3.00188000 | 0.68875900  | -0.23567000 |
| O | -1.67878600 | -1.32867600 | -0.13371000 |
| C | -4.19019700 | -0.07545100 | 0.35022700  |
| H | -2.89681500 | 1.67148400  | 0.24284500  |
| H | -3.17399100 | 0.88298700  | -1.30424100 |
| H | -5.12493300 | 0.46382700  | 0.16580700  |
| H | -4.07885000 | -0.20845500 | 1.43155600  |
| H | -4.25907200 | -1.06838700 | -0.10064300 |

## **N-phenyl propanamidyl radical (Entry 2)**

|                                              |             |
|----------------------------------------------|-------------|
| E(UB3LYP)                                    | -478.923437 |
| Zero-point correction=                       | 0.170396    |
| Thermal correction to Energy=                | 0.180700    |
| Thermal correction to Enthalpy=              | 0.181644    |
| Thermal correction to Gibbs Free Energy=     | 0.132766    |
| Sum of electronic and zero-point Energies=   | -478.753041 |
| Sum of electronic and thermal Energies=      | -478.742737 |
| Sum of electronic and thermal Enthalpies=    | -478.741793 |
| Sum of electronic and thermal Free Energies= | -478.790670 |

Charge = 0; Multiplicity = 2

|   |             |             |             |
|---|-------------|-------------|-------------|
| C | -1.64970500 | -0.09667800 | -0.30856200 |
| O | -1.72978600 | 0.87098800  | -1.05575200 |
| N | -0.51236500 | -0.89615900 | -0.20501400 |
| C | 0.72494500  | -0.38448800 | -0.08329300 |
| C | 1.03095600  | 0.99823400  | 0.14360000  |
| C | 1.81371300  | -1.31189000 | -0.14405300 |
| C | 2.34460800  | 1.40432800  | 0.29329200  |
| H | 0.22132700  | 1.71708200  | 0.17372000  |
| C | 3.12040100  | -0.88603100 | 0.00826300  |
| H | 1.56957100  | -2.35574300 | -0.31321000 |
| C | 3.39508200  | 0.47337000  | 0.22837600  |
| H | 2.56682500  | 2.45446600  | 0.46215800  |
| H | 3.93557400  | -1.60243500 | -0.04162200 |
| H | 4.42195300  | 0.80690700  | 0.34880900  |
| C | -2.82758900 | -0.62076500 | 0.50063900  |
| H | -3.04985700 | -1.63248300 | 0.13562600  |
| H | -2.49385900 | -0.75827100 | 1.53890000  |
| C | -4.05815500 | 0.28052700  | 0.42338300  |
| H | -4.88118100 | -0.14223900 | 1.00922100  |
| H | -3.84015100 | 1.28138000  | 0.80956600  |
| H | -4.39088700 | 0.39690600  | -0.61191500 |

### Methyl N-phenylcarbamate (Entry 3)

|                                              |             |
|----------------------------------------------|-------------|
| E (UB3LYP)                                   | -515.490646 |
| Zero-point correction=                       | 0.161271    |
| Thermal correction to Energy=                | 0.171288    |
| Thermal correction to Enthalpy=              | 0.172233    |
| Thermal correction to Gibbs Free Energy=     | 0.124900    |
| Sum of electronic and zero-point Energies=   | -515.329375 |
| Sum of electronic and thermal Energies=      | -515.319358 |
| Sum of electronic and thermal Enthalpies=    | -515.318413 |
| Sum of electronic and thermal Free Energies= | -515.365746 |

Charge = 0; Multiplicity = 1

|   |             |             |             |
|---|-------------|-------------|-------------|
| C | -1.71722300 | 0.09514100  | 0.00036900  |
| O | -1.75959900 | 1.31037100  | 0.00096700  |
| C | 0.75464100  | -0.30536900 | 0.00054000  |
| C | 1.16667700  | 1.03545400  | 0.00010600  |
| C | 1.71881700  | -1.32551200 | 0.00034200  |
| C | 2.53011200  | 1.33052500  | -0.00045900 |
| H | 0.42489200  | 1.82218100  | 0.00030200  |
| C | 3.07533700  | -1.01301400 | -0.00019500 |
| H | 1.40082300  | -2.36646000 | 0.00078000  |
| C | 3.49169200  | 0.31941200  | -0.00058500 |
| H | 2.83919600  | 2.37258200  | -0.00088700 |
| H | 3.80678600  | -1.81673100 | -0.00031400 |
| H | 4.54972500  | 0.56484300  | -0.00105600 |
| C | -4.06798300 | -0.01105900 | -0.00083700 |
| H | -4.83293300 | -0.78849400 | -0.00113600 |
| H | -4.16155700 | 0.61703300  | 0.88919100  |
| H | -4.16104300 | 0.61723000  | -0.89077700 |
| O | -2.81619700 | -0.70969900 | -0.00050800 |
| N | -0.59860000 | -0.69835500 | 0.00068000  |
| H | -0.78172800 | -1.69254200 | -0.00022400 |

### Methyl *N*-phenylcarbonyl radical (Entry 4)

|                                              |             |
|----------------------------------------------|-------------|
| E(UB3LYP)                                    | -514.833459 |
| Zero-point correction=                       | 0.147424    |
| Thermal correction to Energy=                | 0.157272    |
| Thermal correction to Enthalpy=              | 0.158216    |
| Thermal correction to Gibbs Free Energy=     | 0.110503    |
| Sum of electronic and zero-point Energies=   | -514.686035 |
| Sum of electronic and thermal Energies=      | -514.676187 |
| Sum of electronic and thermal Enthalpies=    | -514.675243 |
| Sum of electronic and thermal Free Energies= | -514.722956 |

Charge = 0; Multiplicity = 2

|   |             |             |             |
|---|-------------|-------------|-------------|
| C | -1.67112600 | -0.08570100 | -0.27514600 |
| O | -1.80626100 | 0.88012300  | -1.00824300 |
| N | -0.55310100 | -0.90758400 | -0.19215900 |
| C | 0.68075000  | -0.38806200 | -0.08069000 |
| C | 0.98974900  | 0.99668400  | 0.13074200  |
| C | 1.76808900  | -1.31779200 | -0.14059000 |
| C | 2.30422800  | 1.40183900  | 0.27110400  |
| H | 0.18116700  | 1.71731300  | 0.15419900  |
| C | 3.07561000  | -0.89253000 | 0.00365000  |
| H | 1.52056700  | -2.36238600 | -0.29916700 |
| C | 3.35318400  | 0.46832400  | 0.21100800  |
| H | 2.52898800  | 2.45323700  | 0.42821100  |
| H | 3.88937600  | -1.61064200 | -0.04308700 |
| H | 4.38097700  | 0.80156700  | 0.32383600  |
| C | -3.89139200 | 0.14614300  | 0.45128800  |
| H | -4.55371700 | -0.35745000 | 1.15627300  |
| H | -3.74790100 | 1.19138700  | 0.73976000  |
| H | -4.30888300 | 0.11225300  | -0.55875700 |
| O | -2.65291600 | -0.57582500 | 0.51020000  |

**TEMPO (Entry 5)**

|                                              |             |
|----------------------------------------------|-------------|
| E(UB3LYP)                                    | -483.719770 |
| Zero-point correction=                       | 0.263320    |
| Thermal correction to Energy=                | 0.275360    |
| Thermal correction to Enthalpy=              | 0.276304    |
| Thermal correction to Gibbs Free Energy=     | 0.226571    |
| Sum of electronic and zero-point Energies=   | -483.456450 |
| Sum of electronic and thermal Energies=      | -483.444410 |
| Sum of electronic and thermal Enthalpies=    | -483.443466 |
| Sum of electronic and thermal Free Energies= | -483.493199 |

Charge = 0; Multiplicity = 2

|   |             |             |             |
|---|-------------|-------------|-------------|
| C | -2.12443800 | 0.14154900  | 0.00000000  |
| C | -1.36048100 | 0.59024900  | 1.24708700  |
| C | 0.07141700  | 0.02335400  | 1.33162300  |
| C | 0.07141700  | 0.02335400  | -1.33162300 |
| C | -1.36048100 | 0.59024900  | -1.24708700 |
| H | -1.30581200 | 1.68759400  | 1.24608700  |
| H | -1.89510500 | 0.30424300  | 2.16132800  |
| H | -2.26657200 | -0.94654700 | 0.00000000  |
| H | -3.12873200 | 0.58244100  | 0.00000000  |
| H | -1.30581200 | 1.68759400  | -1.24608700 |
| H | -1.89510500 | 0.30424300  | -2.16132800 |
| N | 0.75704100  | 0.14868300  | 0.00000000  |
| O | 2.01832100  | -0.10014300 | 0.00000000  |
| C | 0.89197900  | 0.84302400  | 2.34112800  |
| H | 0.40891700  | 0.80557400  | 3.32396900  |
| H | 1.90612200  | 0.44896100  | 2.42690700  |
| H | 0.95596200  | 1.89028100  | 2.02694700  |
| C | 0.07141700  | -1.45936500 | 1.76153100  |
| H | 1.08582800  | -1.86107300 | 1.68659600  |
| H | -0.26423900 | -1.54899500 | 2.80099500  |
| H | -0.58962900 | -2.07256900 | 1.14146600  |
| C | 0.89197900  | 0.84302400  | -2.34112800 |
| H | 1.90612200  | 0.44896100  | -2.42690700 |
| H | 0.40891700  | 0.80557400  | -3.32396900 |
| H | 0.95596200  | 1.89028100  | -2.02694700 |
| C | 0.07141700  | -1.45936500 | -1.76153100 |
| H | 1.08582800  | -1.86107300 | -1.68659600 |
| H | -0.58962900 | -2.07256900 | -1.14146600 |

**Cp\*<sub>2</sub>Ti<sup>III</sup>Cl (Entry 6)**

|                                              |              |
|----------------------------------------------|--------------|
| E(UB3LYP)                                    | -2089.970393 |
| Zero-point correction=                       | 0.449737     |
| Thermal correction to Energy=                | 0.477841     |
| Thermal correction to Enthalpy=              | 0.478786     |
| Thermal correction to Gibbs Free Energy=     | 0.393389     |
| Sum of electronic and zero-point Energies=   | -2089.520656 |
| Sum of electronic and thermal Energies=      | -2089.492551 |
| Sum of electronic and thermal Enthalpies=    | -2089.491607 |
| Sum of electronic and thermal Free Energies= | -2089.577003 |

Charge = 0; Multiplicity = 2

|    |             |             |             |
|----|-------------|-------------|-------------|
| Ti | -0.00002800 | -0.32518400 | -0.00021600 |
| C  | -2.35874000 | -0.71970000 | 0.46848000  |
| C  | -1.95003500 | 0.44384900  | 1.18236900  |
| C  | -1.63901600 | 1.45628200  | 0.22277500  |
| C  | -1.79387200 | 0.89420900  | -1.08379400 |
| C  | -2.24183100 | -0.44980200 | -0.92819300 |
| C  | 2.24097100  | -0.44879500 | 0.92968200  |
| C  | 1.79344900  | 0.89562900  | 1.08286000  |
| C  | 1.63959400  | 1.45568500  | -0.22468700 |
| C  | 1.95092100  | 0.44166400  | -1.18247200 |
| C  | 2.35884300  | -0.72088600 | -0.46648600 |
| Cl | -0.00036200 | -2.69548300 | -0.00025700 |
| C  | 2.94178900  | -1.96148900 | -1.08044600 |
| H  | 4.01810100  | -1.82219700 | -1.25603600 |
| H  | 2.81321200  | -2.83270800 | -0.43567400 |
| H  | 2.47883100  | -2.20030100 | -2.04267200 |
| C  | 2.60179300  | -1.39322900 | 2.04306100  |
| H  | 2.35647400  | -2.42746800 | 1.78627200  |
| H  | 3.67746000  | -1.34690300 | 2.26367600  |
| H  | 2.07133300  | -1.14843600 | 2.96921000  |
| C  | 1.69832300  | 1.63700400  | 2.38979800  |
| H  | 1.31786500  | 1.00118400  | 3.19607800  |
| H  | 2.68574100  | 2.00094000  | 2.70706000  |
| H  | 1.04236000  | 2.50944900  | 2.32130900  |
| C  | 2.04424000  | 0.63406400  | -2.67324300 |
| H  | 1.32528700  | 1.37461800  | -3.03739000 |
| H  | 3.04469000  | 0.98316800  | -2.96711300 |
| H  | 1.85894500  | -0.29984000 | -3.21373100 |
| C  | -1.53035600 | 2.91979600  | 0.55284400  |
| H  | -2.53109400 | 3.31616700  | 0.77695300  |
| H  | -0.91199500 | 3.11343900  | 1.43473500  |
| H  | -1.13248400 | 3.50916600  | -0.27487900 |
| C  | -1.69911400 | 1.63352700  | -2.39193000 |
| H  | -2.68638900 | 1.99809800  | -2.70891200 |
| H  | -1.04209200 | 2.50533500  | -2.32532600 |
| H  | -1.32005000 | 0.99606800  | -3.19756800 |
| C  | -2.60379700 | -1.39579400 | -2.03986100 |
| H  | -3.67951500 | -1.34897900 | -2.26011900 |
| H  | -2.07349900 | -1.15296100 | -2.96661900 |
| H  | -2.35913500 | -2.42977500 | -1.78146500 |
| C  | -2.94116100 | -1.95935600 | 1.08484400  |
| H  | -4.01732000 | -1.81984300 | 1.26118100  |
| H  | -2.81311900 | -2.83156700 | 0.44130200  |

|   |             |             |             |
|---|-------------|-------------|-------------|
| H | -2.47736700 | -2.19666700 | 2.04704900  |
| C | -2.04245000 | 0.63856100  | 2.67289600  |
| H | -3.04314100 | 0.98681400  | 2.96694600  |
| H | -1.85549300 | -0.29418300 | 3.21482900  |
| H | -1.32422000 | 1.38068000  | 3.03523900  |
| C | 1.53126300  | 2.91864100  | -0.55731400 |
| H | 1.13351900  | 3.50953900  | 0.26937800  |
| H | 2.53207000  | 3.31441800  | -0.78215600 |
| H | 0.91290900  | 3.11085100  | -1.43953200 |

**Cp\*<sub>2</sub>Ti<sup>IV</sup>Cl(TEMPO) (Entry 7)**

|                                              |              |
|----------------------------------------------|--------------|
| E(UB3LYP)                                    | -2573.686945 |
| Zero-point correction=                       | 0.716809     |
| Thermal correction to Energy=                | 0.757150     |
| Thermal correction to Enthalpy=              | 0.758094     |
| Thermal correction to Gibbs Free Energy=     | 0.650928     |
| Sum of electronic and zero-point Energies=   | -2572.970135 |
| Sum of electronic and thermal Energies=      | -2572.929795 |
| Sum of electronic and thermal Enthalpies=    | -2572.928850 |
| Sum of electronic and thermal Free Energies= | -2573.036017 |

Charge = 0; Multiplicity = 1

|    |             |             |             |
|----|-------------|-------------|-------------|
| Ti | 0.77233700  | 0.05833800  | -0.16772000 |
| C  | 0.85778600  | 2.63151900  | -0.13708400 |
| C  | 0.19281500  | 2.23879900  | 1.04421400  |
| C  | 1.10603300  | 1.45487000  | 1.82595200  |
| C  | 2.37932100  | 1.49664300  | 1.17314500  |
| C  | 2.20792100  | 2.13612800  | -0.07601300 |
| C  | 0.98207200  | -2.34916600 | -0.99405700 |
| C  | 0.90634200  | -2.45915100 | 0.41405400  |
| C  | 2.06480300  | -1.84094100 | 0.97566200  |
| C  | 2.91139300  | -1.43727800 | -0.10770800 |
| C  | 2.23607200  | -1.73162700 | -1.31348400 |
| Cl | 0.76085000  | 0.60200400  | -2.51671700 |
| O  | -1.06362600 | -0.26637700 | -0.06299800 |
| C  | -4.56408100 | 0.93743200  | -0.76436500 |
| C  | -4.51186800 | -0.26456400 | 1.39372400  |
| C  | -5.32420100 | -0.04216100 | 0.12239800  |
| H  | -5.08841500 | 1.10007600  | -1.71408700 |
| H  | -4.53258600 | 1.90966900  | -0.25415100 |
| H  | -5.00062600 | -0.98721000 | 2.05990800  |
| H  | -4.44981700 | 0.68369900  | 1.94448200  |
| H  | -6.31326300 | 0.36345000  | 0.37043700  |
| H  | -5.50445300 | -0.98815000 | -0.40230800 |
| C  | -2.45747100 | 1.77865900  | -1.71456000 |
| H  | -2.45063500 | 2.59522000  | -0.98823600 |
| H  | -1.44206900 | 1.58776600  | -2.05364700 |
| H  | -3.04683200 | 2.10396800  | -2.58036600 |
| C  | -3.14111600 | -2.23555200 | 0.60503600  |
| H  | -2.24446700 | -2.47399600 | 0.03804300  |
| H  | -3.21248000 | -2.93368400 | 1.44659300  |
| H  | -4.00583700 | -2.41554600 | -0.03775800 |
| C  | -3.07788300 | -0.77699900 | 1.11761700  |
| C  | -2.31958000 | -0.72285500 | 2.45445900  |
| H  | -1.27803800 | -1.01902000 | 2.33315100  |
| H  | -2.34155300 | 0.29184400  | 2.86363100  |
| H  | -2.79056800 | -1.39445400 | 3.18122000  |
| N  | -2.40380000 | 0.19199000  | 0.18506000  |
| C  | -3.10733900 | 0.52670400  | -1.10774700 |
| C  | -3.07483100 | -0.59527700 | -2.16626000 |
| H  | -3.46205700 | -0.20825500 | -3.11581800 |
| H  | -2.04726100 | -0.92216400 | -2.33381700 |
| H  | -3.67931500 | -1.46349300 | -1.89446800 |
| C  | -0.00507500 | -3.35372600 | 1.20516800  |
| H  | 0.58965900  | -4.16444600 | 1.65075300  |



|   |             |             |             |
|---|-------------|-------------|-------------|
| H | -0.51984600 | -2.85312800 | 2.02929400  |
| H | -0.76210500 | -3.82346600 | 0.57640100  |
| C | 0.03984600  | -2.92876200 | -2.00868000 |
| H | 0.42728200  | -3.87610900 | -2.41000900 |
| H | -0.94603700 | -3.13227300 | -1.58389700 |
| H | -0.09747700 | -2.24677800 | -2.85356200 |
| C | 2.86313600  | -1.67288600 | -2.67515900 |
| H | 3.51074100  | -2.55154000 | -2.81776800 |
| H | 2.11579800  | -1.67286000 | -3.46985400 |
| H | 3.48248700  | -0.78104500 | -2.80762800 |
| C | 4.38243600  | -1.12597800 | -0.05471400 |
| H | 4.94338400  | -1.96126600 | -0.49733300 |
| H | 4.65727300  | -0.23242200 | -0.62495100 |
| H | 4.74859900  | -1.00337000 | 0.96528100  |
| C | 2.46638300  | -2.05437400 | 2.40999000  |
| H | 2.73533300  | -3.10973300 | 2.56685100  |
| H | 3.33559100  | -1.46301900 | 2.70287100  |
| H | 1.65484000  | -1.83143500 | 3.10962900  |
| C | 0.88862300  | 1.08504000  | 3.26929200  |
| H | 0.96010300  | 1.97828000  | 3.90792000  |
| H | -0.09624800 | 0.64587600  | 3.44350500  |
| H | 1.63832100  | 0.37624300  | 3.62795000  |
| C | 3.69375400  | 1.31734100  | 1.87844300  |
| H | 3.86016600  | 2.20174900  | 2.51111800  |
| H | 3.72691100  | 0.45180200  | 2.54115900  |
| H | 4.53668800  | 1.25717500  | 1.19001000  |
| C | 3.27451400  | 2.49893200  | -1.06931200 |
| H | 3.52015800  | 3.56825800  | -0.99929800 |
| H | 4.20077400  | 1.94204700  | -0.90278400 |
| H | 2.94083700  | 2.30303600  | -2.09295400 |
| C | 0.38945400  | 3.61149400  | -1.17178100 |
| H | 1.04015300  | 4.49686300  | -1.16401300 |
| H | 0.42696700  | 3.18640100  | -2.17933100 |
| H | -0.63181200 | 3.94821500  | -0.98437000 |
| C | -1.13728000 | 2.73666700  | 1.53559900  |
| H | -1.37939600 | 3.69880900  | 1.07268000  |
| H | -1.94664700 | 2.03828200  | 1.30908900  |
| H | -1.10439200 | 2.89611300  | 2.62004400  |

**Cp\*<sub>2</sub>Ti<sup>III</sup>Cl-N-phenyl propanamide (Entry 8)**

|                                              |              |
|----------------------------------------------|--------------|
| E (UB3LYP)                                   | -2569.548823 |
| Zero-point correction=                       | 0.636213     |
| Thermal correction to Energy=                | 0.675995     |
| Thermal correction to Enthalpy=              | 0.676939     |
| Thermal correction to Gibbs Free Energy=     | 0.564636     |
| Sum of electronic and zero-point Energies=   | -2568.912610 |
| Sum of electronic and thermal Energies=      | -2568.872828 |
| Sum of electronic and thermal Enthalpies=    | -2568.871884 |
| Sum of electronic and thermal Free Energies= | -2568.984186 |

Charge = 0; Multiplicity = 2

|    |             |             |             |
|----|-------------|-------------|-------------|
| Ti | -1.13705700 | 0.13485000  | 0.00849300  |
| C  | -1.27094900 | 0.87353400  | -2.38803400 |
| C  | -0.20102600 | -0.05704000 | -2.34483400 |
| C  | -0.72226800 | -1.32511500 | -1.95982200 |
| C  | -2.13833200 | -1.18092400 | -1.80880500 |
| C  | -2.47240200 | 0.18804100  | -2.03180800 |
| C  | -1.06698600 | 0.20528300  | 2.44172800  |
| C  | -0.46619300 | -1.03999700 | 2.08381300  |
| C  | -1.46818700 | -1.86268000 | 1.50617200  |
| C  | -2.70170900 | -1.13120500 | 1.52516700  |
| C  | -2.45375200 | 0.13588900  | 2.11159400  |
| Cl | -1.63162700 | 2.56418300  | 0.22948800  |
| C  | 0.91409400  | -1.48921400 | 2.47175600  |
| H  | 0.91185800  | -1.89133700 | 3.49552600  |
| H  | 1.29177100  | -2.28172300 | 1.81906300  |
| H  | 1.63938100  | -0.67214800 | 2.44650300  |
| C  | -0.40668600 | 1.31475400  | 3.21045600  |
| H  | -0.58760800 | 1.20826600  | 4.28982000  |
| H  | 0.67919700  | 1.31369700  | 3.06772100  |
| H  | -0.78820000 | 2.29145000  | 2.90030900  |
| C  | -3.51051500 | 1.13388600  | 2.49140200  |
| H  | -3.92582000 | 0.88925300  | 3.48064500  |
| H  | -3.11164100 | 2.14897300  | 2.52865100  |
| H  | -4.34288300 | 1.13926200  | 1.78044900  |
| C  | -4.08101200 | -1.68274700 | 1.28167400  |
| H  | -4.59600200 | -1.83789000 | 2.24044600  |
| H  | -4.70967100 | -1.00426400 | 0.69457600  |
| H  | -4.05984300 | -2.64685600 | 0.77011300  |
| C  | -1.30752700 | -3.33635200 | 1.24804200  |
| H  | -1.39689300 | -3.89761100 | 2.18985800  |
| H  | -2.06894300 | -3.73291600 | 0.57250400  |
| H  | -0.32822800 | -3.58215500 | 0.82589200  |
| C  | 0.02927400  | -2.62808000 | -2.03047000 |
| H  | 0.10255600  | -2.98156900 | -3.06980800 |
| H  | 1.05535500  | -2.53990400 | -1.65690800 |
| H  | -0.46300500 | -3.41860200 | -1.45910500 |
| C  | -3.12361600 | -2.31718400 | -1.82283200 |
| H  | -3.27638300 | -2.64872600 | -2.86046800 |
| H  | -2.78200900 | -3.18993700 | -1.26183800 |
| H  | -4.10221500 | -2.02831100 | -1.43514900 |
| C  | -3.85045900 | 0.79115300  | -2.05940400 |
| H  | -4.21469900 | 0.91360900  | -3.08956600 |
| H  | -4.57788800 | 0.16504400  | -1.53292500 |

|   |             |             |             |
|---|-------------|-------------|-------------|
| H | -3.85463000 | 1.77664800  | -1.58295200 |
| C | -1.18912000 | 2.27449400  | -2.92257700 |
| H | -1.31761700 | 2.26837500  | -4.01528100 |
| H | -1.95762100 | 2.91755000  | -2.49091600 |
| H | -0.22131100 | 2.74145100  | -2.71224500 |
| C | 1.20069900  | 0.20914900  | -2.81476500 |
| H | 1.27361300  | 0.05603100  | -3.90125700 |
| H | 1.51346300  | 1.24042000  | -2.62059900 |
| H | 1.93101400  | -0.45558800 | -2.34674300 |
| O | 1.09080600  | 0.67253200  | 0.18962900  |
| C | 1.97292800  | 1.54669200  | 0.24062700  |
| C | 3.97764100  | 0.00001400  | 0.10827600  |
| C | 2.79137200  | 4.03667700  | 0.25358000  |
| C | 5.37899200  | 0.04157200  | 0.17718000  |
| C | 3.33103200  | -1.23009000 | -0.07055800 |
| H | 2.38472900  | 5.05116300  | 0.30550100  |
| H | 3.50919200  | 3.94485400  | 1.07955000  |
| H | 3.33638400  | 3.95788800  | -0.69528000 |
| C | 6.12543700  | -1.12775700 | 0.06790300  |
| H | 5.88487900  | 0.99500100  | 0.31809000  |
| C | 4.09317500  | -2.39442100 | -0.17925400 |
| H | 2.25315100  | -1.26456200 | -0.11519200 |
| C | 5.48569000  | -2.35579200 | -0.11167600 |
| H | 7.20914800  | -1.07616700 | 0.12398800  |
| H | 3.58275700  | -3.34364100 | -0.31853700 |
| H | 6.06611600  | -3.26960300 | -0.19720000 |
| N | 3.30104600  | 1.23868100  | 0.21566400  |
| H | 3.91953500  | 2.03497900  | 0.28218500  |
| C | 1.64296100  | 3.02743800  | 0.35063000  |
| H | 1.10055300  | 3.15255200  | 1.29368900  |
| H | 0.88224500  | 3.22838500  | -0.40889500 |

### Cp\*<sub>2</sub>Ti<sup>IV</sup>Cl-N-phenyl propanamide aza-enolate (Entry 9)

|                                              |              |
|----------------------------------------------|--------------|
| E (UB3LYP)                                   | -2568.951203 |
| Zero-point correction=                       | 0.624210     |
| Thermal correction to Energy=                | 0.663165     |
| Thermal correction to Enthalpy=              | 0.664109     |
| Thermal correction to Gibbs Free Energy=     | 0.555819     |
| Sum of electronic and zero-point Energies=   | -2568.326993 |
| Sum of electronic and thermal Energies=      | -2568.288038 |
| Sum of electronic and thermal Enthalpies=    | -2568.287094 |
| Sum of electronic and thermal Free Energies= | -2568.395384 |

Charge = 0; Multiplicity = 1

|    |             |             |             |
|----|-------------|-------------|-------------|
| Ti | 0.94336000  | 0.08062300  | 0.13800800  |
| C  | 1.34473700  | -1.10495600 | 2.33088000  |
| C  | -0.02048500 | -1.25176700 | 1.98288500  |
| C  | -0.09097000 | -2.03357500 | 0.78875000  |
| C  | 1.23950800  | -2.38988400 | 0.42111700  |
| C  | 2.13468100  | -1.75804600 | 1.33609400  |
| C  | 1.78481700  | 1.80817500  | -1.52608200 |
| C  | 0.66310400  | 1.17531000  | -2.10147300 |
| C  | 0.96551500  | -0.21240900 | -2.27443200 |
| C  | 2.33398200  | -0.40345700 | -1.88530400 |
| C  | 2.81502500  | 0.82358500  | -1.36468200 |
| Cl | 1.93925900  | 1.71591600  | 1.55720200  |
| C  | -0.56985600 | 1.87116900  | -2.59327100 |
| H  | -0.32351300 | 2.49648100  | -3.46202600 |
| H  | -1.32984500 | 1.15608800  | -2.91090800 |
| H  | -1.01975600 | 2.52341800  | -1.83997400 |
| C  | 1.95325900  | 3.28223000  | -1.30860100 |
| H  | 2.55802600  | 3.71394100  | -2.11884700 |
| H  | 0.99195700  | 3.80375700  | -1.30536800 |
| H  | 2.45688600  | 3.49740500  | -0.36292100 |
| C  | 4.22371100  | 1.11590600  | -0.93497700 |
| H  | 4.78568000  | 1.58881600  | -1.75310300 |
| H  | 4.24412800  | 1.79758100  | -0.08011200 |
| H  | 4.76222600  | 0.20640300  | -0.65300900 |
| C  | 3.22846000  | -1.53445200 | -2.31254500 |
| H  | 3.80992200  | -1.20650300 | -3.18579200 |
| H  | 3.95180500  | -1.82840800 | -1.54757300 |
| H  | 2.67172000  | -2.42049000 | -2.61671600 |
| C  | 0.09809900  | -1.17531800 | -3.04171300 |
| H  | 0.09924800  | -0.92660600 | -4.11228700 |
| H  | 0.44934700  | -2.20605800 | -2.95495600 |
| H  | -0.94304800 | -1.15125400 | -2.70436100 |
| C  | -1.34246800 | -2.58640400 | 0.17012600  |
| H  | -1.69910200 | -3.45539500 | 0.74134200  |
| H  | -2.15074300 | -1.85354800 | 0.15300200  |
| H  | -1.17391700 | -2.92212100 | -0.85680100 |
| C  | 1.56853800  | -3.54764900 | -0.48009700 |
| H  | 1.27599300  | -4.47579400 | 0.03106300  |
| H  | 1.02493500  | -3.53092700 | -1.42791600 |
| H  | 2.63445500  | -3.62539900 | -0.69590800 |
| C  | 3.62563800  | -1.93205300 | 1.43174900  |
| H  | 3.88681000  | -2.59072500 | 2.27151400  |

|   |             |             |             |
|---|-------------|-------------|-------------|
| H | 4.04896200  | -2.37983900 | 0.52914400  |
| H | 4.13331700  | -0.97668400 | 1.60336100  |
| C | 1.86541300  | -0.55180500 | 3.62230800  |
| H | 1.91200200  | -1.35987800 | 4.36737900  |
| H | 2.86838600  | -0.13355600 | 3.51563100  |
| H | 1.22133000  | 0.23519700  | 4.02079600  |
| C | -1.18107700 | -0.78663300 | 2.81041200  |
| H | -1.35544200 | -1.47999200 | 3.64505500  |
| H | -1.00426800 | 0.20321300  | 3.24348700  |
| H | -2.09971500 | -0.73986800 | 2.22410000  |
| O | -0.82737100 | 0.78510900  | 0.23024800  |
| C | -1.78388900 | 1.65110600  | 0.56912500  |
| C | -3.69036000 | 0.34229500  | -0.06392400 |
| C | -2.39372700 | 3.93582500  | 1.56930100  |
| C | -4.46374800 | -0.46074400 | 0.79791600  |
| C | -3.72548400 | 0.05555900  | -1.44140600 |
| H | -1.95223300 | 4.84453600  | 1.99501800  |
| H | -3.00822300 | 4.21761100  | 0.70906800  |
| H | -3.06294400 | 3.49370300  | 2.31288900  |
| C | -5.19610900 | -1.53988600 | 0.30587600  |
| H | -4.48751800 | -0.21292100 | 1.85533500  |
| C | -4.46948600 | -1.01907300 | -1.92873100 |
| H | -3.19112300 | 0.70508500  | -2.12528800 |
| C | -5.20057500 | -1.83225000 | -1.06013000 |
| H | -5.77767200 | -2.14837000 | 0.99442700  |
| H | -4.48307100 | -1.21615000 | -2.99839200 |
| H | -5.77906800 | -2.66823900 | -1.44328600 |
| N | -3.04812100 | 1.46851300  | 0.45483100  |
| C | -1.29122100 | 2.95698800  | 1.16903000  |
| H | -0.60484700 | 3.42323100  | 0.45049800  |
| H | -0.65680200 | 2.71078300  | 2.02880500  |

**Cp\*<sub>2</sub>Ti<sup>III</sup>Cl-Methyl N-phenyl carbamate (Entry 10)**

N.B.: coordinates optimized at UB3LYP/6-31G; frequency at UB3LYP/6-31G(d).

|                                              |              |
|----------------------------------------------|--------------|
| E(UB3LYP)                                    | -2605.447196 |
| Zero-point correction=                       | 0.610892     |
| Thermal correction to Energy=                | 0.650401     |
| Thermal correction to Enthalpy=              | 0.651345     |
| Thermal correction to Gibbs Free Energy=     | 0.541868     |
| Sum of electronic and zero-point Energies=   | -2604.836304 |
| Sum of electronic and thermal Energies=      | -2604.796796 |
| Sum of electronic and thermal Enthalpies=    | -2604.795852 |
| Sum of electronic and thermal Free Energies= | -2604.905329 |

Charge = 0; Multiplicity = 2

|    |             |             |             |
|----|-------------|-------------|-------------|
| Ti | 1.07358100  | 0.09229100  | 0.00076900  |
| C  | 1.37226200  | 0.57505300  | 2.45295600  |
| C  | 0.11599100  | -0.10092700 | 2.37724500  |
| C  | 0.34718300  | -1.42668700 | 1.89378600  |
| C  | 1.76484100  | -1.57848700 | 1.70050400  |
| C  | 2.39722300  | -0.33309700 | 2.02005700  |
| C  | 1.11535400  | 0.41963500  | -2.43346700 |
| C  | 0.16798600  | -0.63862900 | -2.22711500 |
| C  | 0.86999400  | -1.76829600 | -1.70999000 |
| C  | 2.26854900  | -1.42076500 | -1.63766600 |
| C  | 2.41737500  | -0.07924900 | -2.09420500 |
| Cl | 2.20735900  | 2.35118300  | -0.02064600 |
| C  | -1.25052600 | -0.62244700 | -2.72050300 |
| H  | -1.26995000 | -0.74915500 | -3.81299300 |
| H  | -1.85037000 | -1.42837100 | -2.29167800 |
| H  | -1.75996700 | 0.32017100  | -2.49905600 |
| C  | 0.82526700  | 1.73284800  | -3.10197900 |
| H  | 0.97587200  | 1.66320100  | -4.18943900 |
| H  | -0.21166500 | 2.04786800  | -2.94080600 |
| H  | 1.47878200  | 2.52142000  | -2.71945200 |
| C  | 3.72956100  | 0.60374000  | -2.35221300 |
| H  | 4.12123300  | 0.31895300  | -3.34066500 |
| H  | 3.62862100  | 1.68966300  | -2.32180100 |
| H  | 4.48451300  | 0.33061700  | -1.60778400 |
| C  | 3.42086800  | -2.37255200 | -1.46249000 |
| H  | 3.87849900  | -2.58346500 | -2.44015700 |
| H  | 4.21361700  | -1.96404400 | -0.82569700 |
| H  | 3.11015800  | -3.32934100 | -1.03948900 |
| C  | 0.29846100  | -3.15318000 | -1.57257700 |
| H  | 0.36950800  | -3.69688800 | -2.52653500 |
| H  | 0.82581800  | -3.75325000 | -0.82567500 |
| H  | -0.76038200 | -3.13547600 | -1.29460900 |
| C  | -0.63296300 | -2.56873500 | 1.94191000  |
| H  | -0.45228100 | -3.18896300 | 2.83310300  |

|   |             |             |             |
|---|-------------|-------------|-------------|
| H | -1.66598300 | -2.21735200 | 2.00556700  |
| H | -0.55729500 | -3.23269600 | 1.07484800  |
| C | 2.46092100  | -2.90780800 | 1.61176200  |
| H | 2.49514400  | -3.36489200 | 2.61263100  |
| H | 1.94611000  | -3.61739700 | 0.95874300  |
| H | 3.49252800  | -2.81792100 | 1.26685800  |
| C | 3.87644400  | -0.06616400 | 2.07573800  |
| H | 4.26519000  | -0.18654000 | 3.09755300  |
| H | 4.43675200  | -0.75357200 | 1.43295200  |
| H | 4.10531200  | 0.95209600  | 1.74652400  |
| C | 1.59996200  | 1.91240500  | 3.09637300  |
| H | 1.68709400  | 1.79739400  | 4.18748700  |
| H | 2.51012200  | 2.38592000  | 2.72597800  |
| H | 0.77625600  | 2.60916500  | 2.90702800  |
| C | -1.18306300 | 0.44412200  | 2.89914400  |
| H | -1.26943500 | 0.26181500  | 3.98032300  |
| H | -1.25877800 | 1.52714500  | 2.75474000  |
| H | -2.05206900 | -0.01948000 | 2.42436000  |
| O | -0.96425900 | 1.20094200  | -0.08865300 |
| C | -1.96182800 | 1.96060700  | -0.09084100 |
| C | -3.90482500 | 0.32356200  | -0.07160900 |
| C | -0.62664800 | 4.03654700  | -0.11562100 |
| C | -5.30940300 | 0.31142100  | -0.16057200 |
| C | -3.20610600 | -0.88658700 | 0.04895200  |
| H | -0.90131700 | 5.08307700  | 0.00262200  |
| H | 0.01921700  | 3.69061100  | 0.68824900  |
| H | -0.12482500 | 3.85994700  | -1.06593000 |
| C | -6.00678400 | -0.89616500 | -0.13176400 |
| H | -5.85140200 | 1.24883600  | -0.25410200 |
| C | -3.91931300 | -2.09091700 | 0.07559900  |
| H | -2.12824900 | -0.88381800 | 0.11231500  |
| C | -5.31456100 | -2.10752500 | -0.01444000 |
| H | -7.08953200 | -0.88903200 | -0.20156800 |
| H | -3.37140100 | -3.02262000 | 0.17087300  |
| H | -5.85477500 | -3.04768400 | 0.00759100  |
| N | -3.27982400 | 1.59351100  | -0.10043200 |
| H | -3.90403600 | 2.38901000  | -0.12329700 |
| O | -1.91887700 | 3.32650700  | -0.08814400 |

**Cp\*<sub>2</sub>Ti<sup>IV</sup>Cl-Methyl *N*-phenyl carbamate aza-enolate (Entry 11)**

|                                              |              |
|----------------------------------------------|--------------|
| E(UB3LYP)                                    | -2604.858731 |
| Zero-point correction=                       | 0.600453     |
| Thermal correction to Energy=                | 0.639152     |
| Thermal correction to Enthalpy=              | 0.640096     |
| Thermal correction to Gibbs Free Energy=     | 0.531974     |
| Sum of electronic and zero-point Energies=   | -2604.258278 |
| Sum of electronic and thermal Energies=      | -2604.219580 |
| Sum of electronic and thermal Enthalpies=    | -2604.218635 |
| Sum of electronic and thermal Free Energies= | -2604.326757 |

Charge = 0; Multiplicity = 1

|    |             |             |             |
|----|-------------|-------------|-------------|
| Ti | -0.97039400 | 0.01417700  | -0.16817500 |
| C  | -1.32857300 | -1.74423400 | -1.93645500 |
| C  | 0.04182000  | -1.74280100 | -1.56940100 |
| C  | 0.13405100  | -2.17112300 | -0.20956900 |
| C  | -1.18431500 | -2.43658500 | 0.25751300  |
| C  | -2.09829400 | -2.12055200 | -0.79762000 |
| C  | -1.84452300 | 2.12579900  | 0.85366800  |
| C  | -0.77997700 | 1.68039400  | 1.66841200  |
| C  | -1.13726500 | 0.41547700  | 2.22989100  |
| C  | -2.47728600 | 0.12415200  | 1.81730100  |
| C  | -2.88963500 | 1.14538400  | 0.92057500  |
| Cl | -1.72769200 | 1.20389000  | -2.05781900 |
| C  | 0.44382800  | 2.46330000  | 2.03360400  |
| H  | 0.28188000  | 2.98222300  | 2.98916700  |
| H  | 1.31733600  | 1.81900800  | 2.15735900  |
| H  | 0.68262900  | 3.21781600  | 1.28198800  |
| C  | -1.92861700 | 3.46255900  | 0.17792200  |
| H  | -2.16156200 | 4.24207100  | 0.91730200  |
| H  | -0.98548800 | 3.71999900  | -0.30919300 |
| H  | -2.70820100 | 3.47719300  | -0.58539300 |
| C  | -4.25782500 | 1.29266200  | 0.31735200  |
| H  | -4.86061800 | 2.00789500  | 0.89429800  |
| H  | -4.20203400 | 1.65849000  | -0.71191700 |
| H  | -4.80114400 | 0.34319200  | 0.30752100  |
| C  | -3.41522500 | -0.84469700 | 2.48109500  |
| H  | -4.04066500 | -0.29159600 | 3.19598400  |
| H  | -4.09658100 | -1.33508400 | 1.78205000  |
| H  | -2.89082000 | -1.61493900 | 3.04662000  |
| C  | -0.33314900 | -0.28105000 | 3.29462700  |
| H  | -0.29644300 | 0.32863300  | 4.20811700  |
| H  | -0.76288500 | -1.24608800 | 3.57200900  |
| H  | 0.70268700  | -0.45232700 | 2.98236500  |
| C  | 1.40117200  | -2.47341200 | 0.53530000  |
| H  | 1.79022000  | -3.45923200 | 0.24374900  |
| H  | 2.18022300  | -1.73759400 | 0.33031300  |
| H  | 1.24096400  | -2.49651200 | 1.61746800  |



|   |             |             |             |
|---|-------------|-------------|-------------|
| C | -1.48729200 | -3.27945200 | 1.46570100  |
| H | -1.17918200 | -4.31369000 | 1.25692100  |
| H | -0.94261900 | -2.96645000 | 2.35988800  |
| H | -2.55113300 | -3.30630600 | 1.70335600  |
| C | -3.57558800 | -2.40282000 | -0.84840900 |
| H | -3.77696300 | -3.26769600 | -1.49555000 |
| H | -3.98792800 | -2.63803300 | 0.13506900  |
| H | -4.14299400 | -1.56080700 | -1.25975500 |
| C | -1.86604100 | -1.58434700 | -3.32584800 |
| H | -1.92832800 | -2.57326900 | -3.80387500 |
| H | -2.86602300 | -1.14397200 | -3.33318400 |
| H | -1.22358700 | -0.95201300 | -3.94188300 |
| C | 1.18441500  | -1.44705200 | -2.49479100 |
| H | 1.35740500  | -2.29266500 | -3.17481900 |
| H | 0.98323000  | -0.56481300 | -3.11164900 |
| H | 2.10921500  | -1.27000300 | -1.94367500 |
| O | 0.89834900  | 0.58061100  | -0.27496300 |
| C | 1.74216300  | 1.50864500  | -0.65202600 |
| N | 3.02454700  | 1.49395200  | -0.58881700 |
| C | 3.76913900  | 0.45029100  | -0.03245100 |
| C | 1.97121300  | 3.61705100  | -1.71861400 |
| C | 4.53307200  | -0.38415500 | -0.87075600 |
| C | 3.88761700  | 0.27548100  | 1.35918600  |
| H | 1.29270600  | 4.36604300  | -2.13180400 |
| H | 2.59595000  | 4.05200600  | -0.93255400 |
| H | 2.62342200  | 3.21809400  | -2.50020100 |
| C | 5.34771200  | -1.38227300 | -0.33775500 |
| H | 4.47901800  | -0.22761900 | -1.94448100 |
| C | 4.70916100  | -0.72038500 | 1.88728200  |
| H | 3.34514000  | 0.94387700  | 2.02134500  |
| C | 5.43876100  | -1.56175600 | 1.04457800  |
| H | 5.92125300  | -2.01830100 | -1.00797300 |
| H | 4.78334500  | -0.83490600 | 2.96640700  |
| H | 6.07880800  | -2.33593100 | 1.45872700  |
| O | 1.12468300  | 2.59196700  | -1.19222400 |

**Cp<sub>2</sub>Ti<sup>III</sup>Cl (Entry 12)**

|                                              |              |
|----------------------------------------------|--------------|
| E (UB3LYP)                                   | -1696.809033 |
| Zero-point correction=                       | 0.170431     |
| Thermal correction to Energy=                | 0.181723     |
| Thermal correction to Enthalpy=              | 0.182667     |
| Thermal correction to Gibbs Free Energy=     | 0.129394     |
| Sum of electronic and zero-point Energies=   | -1696.638602 |
| Sum of electronic and thermal Energies=      | -1696.627310 |
| Sum of electronic and thermal Enthalpies=    | -1696.626365 |
| Sum of electronic and thermal Free Energies= | -1696.679639 |

Charge = 0; Multiplicity = 1

|    |             |             |             |
|----|-------------|-------------|-------------|
| Ti | -0.00033200 | 0.11126800  | -0.00285900 |
| C  | 2.32856600  | 0.35718200  | 0.53297800  |
| C  | 1.83943500  | -0.79206700 | 1.20621100  |
| C  | 1.47495500  | -1.74478300 | 0.21785200  |
| C  | 1.71765800  | -1.17556300 | -1.06154400 |
| C  | 2.25139500  | 0.12165500  | -0.86221400 |
| C  | -2.21717700 | 0.08246400  | 0.93739800  |
| C  | -1.70975200 | -1.23811500 | 1.00579400  |
| C  | -1.52171000 | -1.70069600 | -0.32445700 |
| C  | -1.89632700 | -0.66030500 | -1.21490300 |
| C  | -2.33534900 | 0.43774800  | -0.42982900 |
| H  | 2.65396500  | 1.27694400  | 0.99896200  |
| H  | 1.78202500  | -0.92922000 | 2.27877700  |
| H  | 1.08427900  | -2.73497700 | 0.40908200  |
| H  | 1.53843200  | -1.65322900 | -2.01676500 |
| H  | 2.51289500  | 0.83091800  | -1.63696900 |
| H  | -2.44154000 | 0.72524200  | 1.77921400  |
| H  | -1.50595300 | -1.79811600 | 1.90998900  |
| H  | -1.15834800 | -2.67798400 | -0.61248500 |
| H  | -1.87774800 | -0.70637300 | -2.29661200 |
| H  | -2.65754000 | 1.39889500  | -0.80490400 |
| Cl | 0.02862800  | 2.45264000  | 0.00064100  |

### Cp<sub>2</sub>Ti<sup>IV</sup>Cl(TEMPO) (Entry 13)

|                                              |              |
|----------------------------------------------|--------------|
| E(UB3LYP)                                    | -2180.559534 |
| Zero-point correction=                       | 0.436884     |
| Thermal correction to Energy=                | 0.460888     |
| Thermal correction to Enthalpy=              | 0.461832     |
| Thermal correction to Gibbs Free Energy=     | 0.386029     |
| Sum of electronic and zero-point Energies=   | -2180.122650 |
| Sum of electronic and thermal Energies=      | -2180.098646 |
| Sum of electronic and thermal Enthalpies=    | -2180.097702 |
| Sum of electronic and thermal Free Energies= | -2180.173505 |

Charge = 0; Multiplicity = 1

|    |             |             |             |
|----|-------------|-------------|-------------|
| Ti | 1.45754400  | 0.05028100  | -0.00149200 |
| C  | 1.41164800  | 1.77478500  | 1.70829300  |
| C  | 0.64005900  | 0.69724600  | 2.18118900  |
| C  | 1.50119100  | -0.42010800 | 2.34334300  |
| C  | 2.82306100  | 0.00098900  | 2.03318300  |
| C  | 2.76609000  | 1.34205500  | 1.60874200  |
| C  | 1.68087500  | -1.32959700 | -2.06082700 |
| C  | 1.45893300  | -2.22197800 | -0.99146600 |
| C  | 2.55294300  | -2.12221000 | -0.09859100 |
| C  | 3.48452600  | -1.19581900 | -0.65088400 |
| C  | 2.94168600  | -0.70874300 | -1.85587600 |
| H  | 1.04293500  | 2.74910800  | 1.42554600  |
| H  | -0.43618100 | 0.68187700  | 2.28028300  |
| H  | 1.20826600  | -1.40273000 | 2.68871700  |
| H  | 3.71181500  | -0.61224700 | 2.08447800  |
| H  | 3.59516700  | 1.93918600  | 1.25350800  |
| H  | 1.00043900  | -1.12419000 | -2.87604700 |
| H  | 0.58194300  | -2.83592000 | -0.84691300 |
| H  | 2.68218700  | -2.69324300 | 0.81136800  |
| H  | 4.43646300  | -0.90956000 | -0.22468500 |
| H  | 3.38751400  | 0.03885600  | -2.49473400 |
| Cl | 1.77019500  | 2.01543900  | -1.34994500 |
| O  | -0.35280900 | -0.16009800 | -0.27150200 |
| C  | -3.76647100 | 1.28541200  | 0.15461800  |
| C  | -3.77101800 | -1.09400200 | 0.85485000  |
| C  | -4.55055700 | -0.02283300 | 0.09626500  |
| H  | -4.28019900 | 2.07892200  | -0.40168500 |
| H  | -3.71633900 | 1.61572400  | 1.20124300  |
| H  | -4.28729200 | -2.06155500 | 0.82115900  |
| H  | -3.71029200 | -0.80261900 | 1.91221000  |
| H  | -5.54160300 | 0.11179000  | 0.54745300  |
| H  | -4.72571100 | -0.32724600 | -0.94297000 |
| C  | -1.60377300 | 2.48747400  | 0.01582600  |
| H  | -1.53610000 | 2.56239400  | 1.10632600  |
| H  | -0.60406500 | 2.55556900  | -0.41427100 |

|   |             |             |             |
|---|-------------|-------------|-------------|
| H | -2.18182100 | 3.34685400  | -0.34389700 |
| C | -2.36638900 | -2.04318000 | -1.03918400 |
| H | -1.40348400 | -1.95481800 | -1.54554900 |
| H | -2.57579000 | -3.10723900 | -0.87806500 |
| H | -3.13606800 | -1.66070100 | -1.71307300 |
| C | -2.33572800 | -1.30445700 | 0.31939700  |
| C | -1.59153400 | -2.18300500 | 1.34414900  |
| H | -0.58041500 | -2.42682000 | 1.01247900  |
| H | -1.52568600 | -1.67184700 | 2.31026200  |
| H | -2.13558800 | -3.12295000 | 1.49140800  |
| N | -1.64546900 | 0.03331400  | 0.29797600  |
| C | -2.32262700 | 1.18988500  | -0.39515900 |
| C | -2.31381100 | 1.10328800  | -1.93675900 |
| H | -2.65567600 | 2.05675100  | -2.35522300 |
| H | -1.29946600 | 0.92377100  | -2.30050000 |
| H | -2.96809300 | 0.32060300  | -2.32741700 |

## TEMPOH (Entry 14)

|                                              |             |
|----------------------------------------------|-------------|
| E(UB3LYP)                                    | -484.325986 |
| Zero-point correction=                       | 0.275298    |
| Thermal correction to Energy=                | 0.287401    |
| Thermal correction to Enthalpy=              | 0.288346    |
| Thermal correction to Gibbs Free Energy=     | 0.239674    |
| Sum of electronic and zero-point Energies=   | -484.050688 |
| Sum of electronic and thermal Energies=      | -484.038585 |
| Sum of electronic and thermal Enthalpies=    | -484.037641 |
| Sum of electronic and thermal Free Energies= | -484.086313 |

Charge = 0; Multiplicity = 1

|   |             |             |             |
|---|-------------|-------------|-------------|
| C | 0.00000000  | 2.17007900  | 0.02032000  |
| C | 1.25168100  | 1.43458200  | -0.46577500 |
| C | 1.29486000  | -0.04858600 | -0.03259100 |
| C | -1.29486000 | -0.04858600 | -0.03259100 |
| C | -1.25168200 | 1.43458200  | -0.46577500 |
| H | 1.28029800  | 1.47672000  | -1.56304000 |
| H | 2.16248500  | 1.92819300  | -0.10405200 |
| H | 0.00000000  | 2.24859400  | 1.11470200  |
| H | -0.00000100 | 3.19946700  | -0.35968300 |
| H | -1.28029800 | 1.47671900  | -1.56304000 |
| H | -2.16248500 | 1.92819300  | -0.10405200 |
| N | 0.00000000  | -0.66173100 | -0.44703600 |
| C | 2.39353400  | -0.76494800 | -0.84232400 |
| H | 3.35844300  | -0.26475800 | -0.70069200 |
| H | 2.50155300  | -1.80538000 | -0.52193400 |
| H | 2.14983700  | -0.75128400 | -1.91032300 |
| C | 1.63464900  | -0.18756400 | 1.46918500  |
| H | 1.46862700  | -1.21657700 | 1.79849600  |
| H | 2.69093100  | 0.05665200  | 1.63253100  |
| H | 1.04445100  | 0.47670500  | 2.10469400  |
| C | -2.39353400 | -0.76494800 | -0.84232400 |
| H | -2.50155200 | -1.80538100 | -0.52193400 |
| H | -3.35844300 | -0.26475800 | -0.70069300 |
| H | -2.14983700 | -0.75128400 | -1.91032300 |
| C | -1.63464900 | -0.18756400 | 1.46918500  |
| H | -1.46862600 | -1.21657700 | 1.79849600  |
| H | -1.04445200 | 0.47670500  | 2.10469300  |
| H | -2.69093100 | 0.05665100  | 1.63253100  |
| O | 0.00000000  | -2.03835200 | 0.00819300  |
| H | 0.00000300  | -2.53194300 | -0.82652100 |

**Cp\*<sub>2</sub>Ti<sup>III</sup>Cl-LANL2DZ (Entry 15)**

|                                              |              |
|----------------------------------------------|--------------|
| E(UB3LYP)                                    | -1298.613131 |
| Zero-point correction=                       | 0.449545     |
| Thermal correction to Energy=                | 0.477716     |
| Thermal correction to Enthalpy=              | 0.478661     |
| Thermal correction to Gibbs Free Energy=     | 0.393094     |
| Sum of electronic and zero-point Energies=   | -1298.163586 |
| Sum of electronic and thermal Energies=      | -1298.135415 |
| Sum of electronic and thermal Enthalpies=    | -1298.134471 |
| Sum of electronic and thermal Free Energies= | -1298.220037 |

Charge = 0; Multiplicity = 2

|    |             |             |             |
|----|-------------|-------------|-------------|
| Ti | -0.00001900 | -0.32384600 | -0.00015600 |
| C  | -2.34972300 | -0.72170500 | 0.46667200  |
| C  | -1.94302600 | 0.44031100  | 1.18434000  |
| C  | -1.63565800 | 1.45629400  | 0.22815500  |
| C  | -1.78790300 | 0.89762800  | -1.08060600 |
| C  | -2.23381000 | -0.44719600 | -0.92930400 |
| C  | 2.23320300  | -0.44639800 | 0.93038000  |
| C  | 1.78756400  | 0.89870100  | 1.07992800  |
| C  | 1.63601700  | 1.45589700  | -0.22954000 |
| C  | 1.94364400  | 0.43878000  | -1.18441100 |
| C  | 2.34981500  | -0.72249400 | -0.46522400 |
| Cl | -0.00021300 | -2.68867500 | -0.00020000 |
| C  | 2.93017800  | -1.96493700 | -1.07717400 |
| H  | 4.00522000  | -1.82336200 | -1.26002500 |
| H  | 2.80744100  | -2.83302500 | -0.42710600 |
| H  | 2.46044200  | -2.20791200 | -2.03499100 |
| C  | 2.58682500  | -1.39053100 | 2.04610300  |
| H  | 2.34396900  | -2.42448200 | 1.78626400  |
| H  | 3.66102700  | -1.34179500 | 2.27405000  |
| H  | 2.04794300  | -1.14681900 | 2.96765100  |
| C  | 1.69264400  | 1.64311600  | 2.38505400  |
| H  | 1.31524400  | 1.00780200  | 3.19322600  |
| H  | 2.68053700  | 2.00959300  | 2.69846600  |
| H  | 1.03475500  | 2.51402100  | 2.31563900  |
| C  | 2.02752300  | 0.62160400  | -2.67682900 |
| H  | 1.32400400  | 1.37878400  | -3.03673200 |
| H  | 3.03417400  | 0.94319300  | -2.98110700 |
| H  | 1.81187200  | -0.31009000 | -3.20999700 |
| C  | -1.52810500 | 2.91906300  | 0.56092200  |
| H  | -2.52980400 | 3.31282800  | 0.78607300  |
| H  | -0.90959000 | 3.11131100  | 1.44295700  |
| H  | -1.13178200 | 3.50987200  | -0.26651800 |
| C  | -1.69326200 | 1.64055900  | -2.38660200 |
| H  | -2.68104900 | 2.00751400  | -2.69979400 |
| H  | -1.03459300 | 2.51099300  | -2.31856600 |
| H  | -1.31689700 | 1.00405200  | -3.19431700 |

|   |             |             |             |
|---|-------------|-------------|-------------|
| C | -2.58823300 | -1.39246200 | -2.04380200 |
| H | -3.66246800 | -1.34338400 | -2.27151900 |
| H | -2.04944500 | -1.15016000 | -2.96577600 |
| H | -2.34585300 | -2.42622200 | -1.78280300 |
| C | -2.92961900 | -1.96349500 | 1.08039000  |
| H | -4.00449700 | -1.82172600 | 1.26404100  |
| H | -2.80745500 | -2.83225400 | 0.43111000  |
| H | -2.45906200 | -2.20549400 | 2.03805800  |
| C | -2.02626300 | 0.62480700  | 2.67658800  |
| H | -3.03308000 | 0.94571300  | 2.98103000  |
| H | -1.80935500 | -0.30601600 | 3.21078300  |
| H | -1.32334400 | 1.38315200  | 3.03518200  |
| C | 1.52865100  | 2.91825400  | -0.56415800 |
| H | 1.13241400  | 3.51015700  | 0.26253800  |
| H | 2.53038200  | 3.31162100  | -0.78985700 |
| H | 0.91011600  | 3.10944000  | -1.44641800 |

**Cp\*<sub>2</sub>Ti<sup>IV</sup>Cl(TEMPO)-LANL2DZ (Entry 16)**

|                                              |              |
|----------------------------------------------|--------------|
| E(UB3LYP)                                    | -1782.318671 |
| Zero-point correction=                       | 0.716466     |
| Thermal correction to Energy=                | 0.756959     |
| Thermal correction to Enthalpy=              | 0.757903     |
| Thermal correction to Gibbs Free Energy=     | 0.650168     |
| Sum of electronic and zero-point Energies=   | -1781.602205 |
| Sum of electronic and thermal Energies=      | -1781.561711 |
| Sum of electronic and thermal Enthalpies=    | -1781.560767 |
| Sum of electronic and thermal Free Energies= | -1781.668502 |

Charge = 0; Multiplicity = 1

|    |             |             |             |
|----|-------------|-------------|-------------|
| Ti | 0.76843700  | 0.05780600  | -0.15262000 |
| C  | 0.86606900  | 2.62727000  | -0.09527500 |
| C  | 0.19455800  | 2.21563900  | 1.07410100  |
| C  | 1.10067400  | 1.41018200  | 1.84409900  |
| C  | 2.37977300  | 1.46842000  | 1.20368100  |
| C  | 2.21487600  | 2.12367600  | -0.03750200 |
| C  | 0.99383000  | -2.30430500 | -1.04364700 |
| C  | 0.90993100  | -2.45656600 | 0.35948600  |
| C  | 2.06696200  | -1.85707300 | 0.94576100  |
| C  | 2.92491100  | -1.43221800 | -0.12048000 |
| C  | 2.25482800  | -1.68502900 | -1.33753800 |
| Cl | 0.75376500  | 0.64590000  | -2.49950100 |
| O  | -1.07146200 | -0.26890200 | -0.05189200 |
| C  | -4.56309900 | 0.95640800  | -0.75124500 |
| C  | -4.52892100 | -0.29839100 | 1.37698800  |
| C  | -5.33080800 | -0.04482000 | 0.10456800  |
| H  | -5.08007600 | 1.14357700  | -1.70048600 |
| H  | -4.53355600 | 1.91551800  | -0.21647000 |
| H  | -5.02275900 | -1.03753100 | 2.02092600  |
| H  | -4.47221200 | 0.63627800  | 1.95122300  |
| H  | -6.32221900 | 0.35404200  | 0.35424600  |
| H  | -5.50520300 | -0.97760200 | -0.44510400 |
| C  | -2.44750800 | 1.81277600  | -1.67108400 |
| H  | -2.44635200 | 2.61615000  | -0.93017700 |
| H  | -1.42928500 | 1.62529500  | -2.00428300 |
| H  | -3.02885500 | 2.15409800  | -2.53633100 |
| C  | -3.14836500 | -2.25057200 | 0.55446600  |
| H  | -2.25350600 | -2.46803900 | -0.02412300 |
| H  | -3.20907400 | -2.96937300 | 1.37940300  |
| H  | -4.01627800 | -2.42077000 | -0.08694200 |
| C  | -3.09202400 | -0.80334300 | 1.10084400  |
| C  | -2.34556100 | -0.77720900 | 2.44570700  |
| H  | -1.30345900 | -1.07473800 | 2.33014200  |
| H  | -2.36809600 | 0.22974200  | 2.87397900  |
| H  | -2.82642800 | -1.46110200 | 3.15452700  |
| N  | -2.41096500 | 0.18490900  | 0.19499100  |



|   |             |             |             |
|---|-------------|-------------|-------------|
| C | -3.10499500 | 0.55039400  | -1.09424100 |
| C | -3.06913600 | -0.54921900 | -2.17656400 |
| H | -3.45010600 | -0.13967200 | -3.11938500 |
| H | -2.04134300 | -0.87473200 | -2.34567000 |
| H | -3.67790900 | -1.42138500 | -1.92741500 |
| C | -0.00966400 | -3.36714000 | 1.12120000  |
| H | 0.58144900  | -4.18427200 | 1.56004700  |
| H | -0.53630200 | -2.88130300 | 1.94643300  |
| H | -0.75679600 | -3.82663000 | 0.47330300  |
| C | 0.05551700  | -2.84671000 | -2.08143300 |
| H | 0.46016300  | -3.76155900 | -2.53760900 |
| H | -0.92188900 | -3.09368400 | -1.66000200 |
| H | -0.10144300 | -2.11870300 | -2.88354300 |
| C | 2.88928100  | -1.58190800 | -2.69320000 |
| H | 3.56952100  | -2.43432200 | -2.84474500 |
| H | 2.14705000  | -1.59620200 | -3.49238900 |
| H | 3.47548400  | -0.66507900 | -2.80628300 |
| C | 4.39624100  | -1.12806800 | -0.05012600 |
| H | 4.95601000  | -1.95243700 | -0.51472400 |
| H | 4.67520800  | -0.21933900 | -0.59347800 |
| H | 4.75738800  | -1.03699600 | 0.97505500  |
| C | 2.45496800  | -2.10735700 | 2.37760300  |
| H | 2.71627500  | -3.16801500 | 2.51107200  |
| H | 3.32476200  | -1.52789800 | 2.69221500  |
| H | 1.63713700  | -1.89591000 | 3.07331400  |
| C | 0.87145800  | 1.01089900  | 3.27725300  |
| H | 0.94916100  | 1.88946000  | 3.93550000  |
| H | -0.11969600 | 0.57962800  | 3.43372900  |
| H | 1.61103400  | 0.28553400  | 3.62347200  |
| C | 3.68814200  | 1.27234100  | 1.91485300  |
| H | 3.84913500  | 2.14294500  | 2.56815500  |
| H | 3.71413200  | 0.39272100  | 2.55910700  |
| H | 4.53640700  | 1.22672400  | 1.23197000  |
| C | 3.28275800  | 2.48811600  | -1.02798500 |
| H | 3.50708000  | 3.56320600  | -0.97647000 |
| H | 4.21729600  | 1.95141600  | -0.84281500 |
| H | 2.95812000  | 2.26573200  | -2.04941300 |
| C | 0.40652600  | 3.62403900  | -1.11679900 |
| H | 1.05985400  | 4.50745300  | -1.09117800 |
| H | 0.45104300  | 3.21084800  | -2.12907100 |
| H | -0.61533600 | 3.96002700  | -0.93133200 |
| C | -1.13713800 | 2.70321000  | 1.56924700  |
| H | -1.39044500 | 3.66209500  | 1.10581600  |
| H | -1.93921600 | 1.99536700  | 1.34498300  |
| H | -1.10155100 | 2.86360000  | 2.65375100  |

**Cp\*<sub>2</sub>Ti<sup>III</sup>Cl-N-phenyl propanamide-LANL2DZ (Entry 17)**

|                                              |              |
|----------------------------------------------|--------------|
| E(UB3LYP)                                    | -1778.183839 |
| Zero-point correction=                       | 0.636119     |
| Thermal correction to Energy=                | 0.675937     |
| Thermal correction to Enthalpy=              | 0.676881     |
| Thermal correction to Gibbs Free Energy=     | 0.564784     |
| Sum of electronic and zero-point Energies=   | -1777.547720 |
| Sum of electronic and thermal Energies=      | -1777.507902 |
| Sum of electronic and thermal Enthalpies=    | -1777.506958 |
| Sum of electronic and thermal Free Energies= | -1777.619055 |

Charge = 0; Multiplicity = 2

|    |             |             |             |
|----|-------------|-------------|-------------|
| Ti | 1.13321200  | 0.12574000  | 0.00712600  |
| C  | 2.46038000  | 0.13401400  | 2.09806200  |
| C  | 1.07343600  | 0.19719900  | 2.42933100  |
| C  | 0.47915500  | -1.05346800 | 2.07827600  |
| C  | 1.48289800  | -1.87045700 | 1.49695100  |
| C  | 2.71308000  | -1.13123400 | 1.51082200  |
| C  | 1.25026900  | 0.87737200  | -2.37611100 |
| C  | 0.18984600  | -0.06432400 | -2.33516900 |
| C  | 0.72450400  | -1.32858200 | -1.95768600 |
| C  | 2.14089000  | -1.17228500 | -1.81702100 |
| C  | 2.46046800  | 0.20094500  | -2.03124000 |
| Cl | 1.64533800  | 2.56376900  | 0.23308000  |
| C  | -1.21707800 | 0.19108700  | -2.79427600 |
| H  | -1.29521300 | 0.03790900  | -3.88058100 |
| H  | -1.93818800 | -0.48020900 | -2.32135100 |
| H  | -1.53562000 | 1.21980200  | -2.59659100 |
| C  | 1.15054700  | 2.28018600  | -2.90194100 |
| H  | 1.26323300  | 2.27963300  | -3.99664800 |
| H  | 0.18195600  | 2.73716600  | -2.67426700 |
| H  | 1.92049200  | 2.92600900  | -2.47729300 |
| C  | 3.83163900  | 0.81878500  | -2.05471300 |
| H  | 4.18960400  | 0.95966200  | -3.08486000 |
| H  | 3.82440600  | 1.79647200  | -1.56272400 |
| H  | 4.56695700  | 0.19256000  | -1.53940300 |
| C  | 3.13639100  | -2.29906600 | -1.83791300 |
| H  | 3.28502600  | -2.62745000 | -2.87736800 |
| H  | 4.11440800  | -2.00066600 | -1.45605300 |
| H  | 2.80547300  | -3.17517600 | -1.27582500 |
| C  | -0.01858900 | -2.63641300 | -2.02249100 |
| H  | -0.10647200 | -2.98446600 | -3.06268100 |
| H  | 0.48919100  | -3.42559000 | -1.46311900 |
| H  | -1.03866400 | -2.55617700 | -1.63089700 |
| C  | -0.89997200 | -1.50744700 | 2.46383000  |
| H  | -0.89674600 | -1.91200300 | 3.48677900  |
| H  | -1.62654900 | -0.69162200 | 2.43944700  |
| H  | -1.27414400 | -2.29918500 | 1.80807800  |

|   |             |             |             |
|---|-------------|-------------|-------------|
| C | 1.32960000  | -3.34403800 | 1.23561100  |
| H | 1.43089300  | -3.90692500 | 2.17545200  |
| H | 0.34802300  | -3.59354400 | 0.82112900  |
| H | 2.08808200  | -3.73317700 | 0.55238400  |
| C | 4.09476200  | -1.67279700 | 1.26027700  |
| H | 4.61602000  | -1.82100100 | 2.21700700  |
| H | 4.07799400  | -2.63848600 | 0.75141900  |
| H | 4.71347500  | -0.98958200 | 0.66801000  |
| C | 3.51480300  | 1.13720500  | 2.46985800  |
| H | 3.97198000  | 0.86520400  | 3.43343800  |
| H | 4.31670900  | 1.18208000  | 1.72608600  |
| H | 3.10086900  | 2.14279100  | 2.55757000  |
| C | 0.40911100  | 1.30392200  | 3.19801200  |
| H | 0.60403900  | 1.20560200  | 4.27585100  |
| H | 0.77651100  | 2.28206100  | 2.87542100  |
| H | -0.67799900 | 1.28843000  | 3.06640000  |
| O | -1.09266000 | 0.65201400  | 0.19996100  |
| C | -1.96540700 | 1.53573700  | 0.25111700  |
| C | -3.98535000 | 0.00836200  | 0.11500900  |
| C | -2.75875000 | 4.03324400  | 0.24981500  |
| C | -5.38712700 | 0.06442800  | 0.17318900  |
| C | -3.35035900 | -1.22955100 | -0.05420000 |
| H | -2.34210800 | 5.04370500  | 0.30327900  |
| H | -3.29161100 | 3.95587600  | -0.70613000 |
| H | -3.48887600 | 3.95269400  | 1.06631800  |
| C | -6.14515100 | -1.09766800 | 0.06275800  |
| H | -5.88421800 | 1.02354400  | 0.30667000  |
| C | -4.12398800 | -2.38658000 | -0.16427900 |
| H | -2.27255900 | -1.27604500 | -0.09004900 |
| C | -5.51682000 | -2.33331500 | -0.10740000 |
| H | -7.22864500 | -1.03454000 | 0.11055300  |
| H | -3.62256600 | -3.34171500 | -0.29591800 |
| H | -6.10606800 | -3.24137300 | -0.19380900 |
| C | -1.62180300 | 3.01272600  | 0.36613900  |
| H | -0.84474400 | 3.20590400  | -0.37860100 |
| H | -1.09470500 | 3.13202100  | 1.31874100  |
| N | -3.29715100 | 1.24040100  | 0.22409200  |
| H | -3.90804700 | 2.04261700  | 0.28898600  |

**Cp\*<sub>2</sub>Ti<sup>IV</sup>Cl-N-phenyl propanamide aza-enolate-LANL2DZ (Entry 18)**

|                                              |              |
|----------------------------------------------|--------------|
| E(UB3LYP)                                    | -1777.581158 |
| Zero-point correction=                       | 0.623903     |
| Thermal correction to Energy=                | 0.663004     |
| Thermal correction to Enthalpy=              | 0.663948     |
| Thermal correction to Gibbs Free Energy=     | 0.555266     |
| Sum of electronic and zero-point Energies=   | -1776.957255 |
| Sum of electronic and thermal Energies=      | -1776.918154 |
| Sum of electronic and thermal Enthalpies=    | -1776.917210 |
| Sum of electronic and thermal Free Energies= | -1777.025892 |

Charge = 0; Multiplicity = 1

|    |             |             |             |
|----|-------------|-------------|-------------|
| Ti | 0.93667100  | 0.07898400  | 0.12601200  |
| C  | 1.34572300  | -1.03401800 | 2.35387100  |
| C  | -0.01670900 | -1.19137400 | 2.00258800  |
| C  | -0.08033800 | -2.00791300 | 0.83109300  |
| C  | 1.25257100  | -2.37578800 | 0.48301800  |
| C  | 2.14175000  | -1.71095600 | 1.37977400  |
| C  | 1.78772600  | 1.76499700  | -1.57017200 |
| C  | 0.66468300  | 1.11808100  | -2.12477000 |
| C  | 0.96513700  | -0.27501700 | -2.25904600 |
| C  | 2.33727400  | -0.45437000 | -1.87526900 |
| C  | 2.81881800  | 0.78436100  | -1.38557200 |
| Cl | 1.93309900  | 1.75175000  | 1.50205000  |
| C  | -0.57128900 | 1.80030000  | -2.62616700 |
| H  | -0.33387400 | 2.39063100  | -3.52178900 |
| H  | -1.33864300 | 1.07717900  | -2.90520100 |
| H  | -1.00654800 | 2.48225600  | -1.89094100 |
| C  | 1.95604000  | 3.24335000  | -1.38851500 |
| H  | 2.56253400  | 3.65449700  | -2.20845000 |
| H  | 0.99437200  | 3.76409400  | -1.39963700 |
| H  | 2.45798600  | 3.47997400  | -0.44707700 |
| C  | 4.22434400  | 1.08675700  | -0.95410000 |
| H  | 4.77830800  | 1.58134500  | -1.76488000 |
| H  | 4.23500100  | 1.75386000  | -0.08730600 |
| H  | 4.77329400  | 0.17867600  | -0.68850800 |
| C  | 3.22823300  | -1.59884500 | -2.27142400 |
| H  | 3.81104300  | -1.29534000 | -3.15277300 |
| H  | 3.94941500  | -1.87401600 | -1.49754700 |
| H  | 2.66805100  | -2.49030400 | -2.55237800 |
| C  | 0.09392800  | -1.25988300 | -2.99267100 |
| H  | 0.10444300  | -1.05399300 | -4.07245900 |
| H  | 0.43488400  | -2.28934800 | -2.86057600 |
| H  | -0.94855700 | -1.21208000 | -2.66205600 |
| C  | -1.32961000 | -2.57427800 | 0.22107700  |
| H  | -1.70749400 | -3.40808900 | 0.82996900  |
| H  | -2.12621700 | -1.83100700 | 0.15507500  |

|   |             |             |             |
|---|-------------|-------------|-------------|
| H | -1.14914100 | -2.96277300 | -0.78490400 |
| C | 1.58896900  | -3.56008000 | -0.37982500 |
| H | 1.29804200  | -4.47190400 | 0.16122300  |
| H | 1.04783100  | -3.57593200 | -1.32898600 |
| H | 2.65599500  | -3.64035300 | -0.58904600 |
| C | 3.63392700  | -1.86594800 | 1.48068100  |
| H | 3.90192800  | -2.49135200 | 2.34361000  |
| H | 4.06172200  | -2.34075800 | 0.59410800  |
| H | 4.12846000  | -0.89811300 | 1.61732000  |
| C | 1.85969400  | -0.43983400 | 3.62899300  |
| H | 1.90905500  | -1.22604900 | 4.39734700  |
| H | 2.86036500  | -0.01898000 | 3.51143100  |
| H | 1.20879100  | 0.35416900  | 4.00158500  |
| C | -1.18165400 | -0.70607600 | 2.81152800  |
| H | -1.34465900 | -1.36636400 | 3.67504600  |
| H | -1.01608600 | 0.30356800  | 3.20123800  |
| H | -2.10152500 | -0.69693000 | 2.22547500  |
| O | -0.83440100 | 0.78403200  | 0.20210000  |
| C | -1.78776800 | 1.65974300  | 0.52992000  |
| C | -3.69729100 | 0.33971800  | -0.06998700 |
| C | -2.38634900 | 3.96364600  | 1.49081400  |
| C | -4.46784700 | -0.44581800 | 0.81075900  |
| C | -3.73463100 | 0.02325400  | -1.44115500 |
| H | -1.93999900 | 4.87858300  | 1.89811300  |
| H | -3.00297500 | 4.23181700  | 0.62764000  |
| H | -3.05440600 | 3.53781200  | 2.24502600  |
| C | -5.20075500 | -1.53582100 | 0.34331800  |
| H | -4.48934000 | -0.17557200 | 1.86271400  |
| C | -4.47960900 | -1.06179600 | -1.90416500 |
| H | -3.20127300 | 0.65769300  | -2.13965500 |
| C | -5.20830100 | -1.85705100 | -1.01662100 |
| H | -5.78042000 | -2.12989500 | 1.04587600  |
| H | -4.49543400 | -1.28157600 | -2.96936400 |
| H | -5.78760000 | -2.70094600 | -1.38071600 |
| N | -3.05280500 | 1.47596500  | 0.42417200  |
| C | -1.28807000 | 2.97399800  | 1.10469900  |
| H | -0.60186800 | 3.42439500  | 0.37601300  |
| H | -0.65165100 | 2.73966500  | 1.96626600  |

**Cp\*<sub>2</sub>Ti<sup>III</sup>Cl-Methyl N-phenyl carbamate-LANL2DZ (Entry 19)**

|                                              |              |
|----------------------------------------------|--------------|
| E(UB3LYP)                                    | -1814.079024 |
| Zero-point correction=                       | 0.612527     |
| Thermal correction to Energy=                | 0.652027     |
| Thermal correction to Enthalpy=              | 0.652971     |
| Thermal correction to Gibbs Free Energy=     | 0.542154     |
| Sum of electronic and zero-point Energies=   | -1813.466497 |
| Sum of electronic and thermal Energies=      | -1813.426997 |
| Sum of electronic and thermal Enthalpies=    | -1813.426052 |
| Sum of electronic and thermal Free Energies= | -1813.536870 |

Charge = 0; Multiplicity = 2

|    |             |             |             |
|----|-------------|-------------|-------------|
| Ti | 1.08397300  | -0.03442800 | 0.13493000  |
| C  | 1.16082500  | -1.72725300 | 1.96003600  |
| C  | -0.12326000 | -1.74282100 | 1.33906400  |
| C  | 0.04261000  | -2.22064800 | 0.00072500  |
| C  | 1.42373200  | -2.48555900 | -0.19974200 |
| C  | 2.11877300  | -2.15968000 | 1.01018800  |
| C  | 1.93905000  | 2.15256200  | -0.69104800 |
| C  | 1.32320400  | 1.52712200  | -1.80837400 |
| C  | 2.04282800  | 0.33686400  | -2.10909000 |
| C  | 3.13754500  | 0.24609800  | -1.19077800 |
| C  | 3.04400100  | 1.34042000  | -0.28476900 |
| Cl | 0.69223600  | 1.36976200  | 2.17732200  |
| C  | 0.20764900  | 2.07117900  | -2.65588800 |
| H  | 0.60872500  | 2.52074200  | -3.57610300 |
| H  | -0.49174600 | 1.28481300  | -2.95977200 |
| H  | -0.36275400 | 2.84264400  | -2.13395500 |
| C  | 1.66178100  | 3.52574900  | -0.15097000 |
| H  | 2.49679900  | 4.19814600  | -0.39518100 |
| H  | 0.75496700  | 3.95467100  | -0.58386600 |
| H  | 1.54548500  | 3.50732700  | 0.93652700  |
| C  | 4.02455600  | 1.70587900  | 0.79563700  |
| H  | 4.74852400  | 2.45418900  | 0.43985800  |
| H  | 3.50865200  | 2.12334300  | 1.66572200  |
| H  | 4.59783000  | 0.83717900  | 1.13596300  |
| C  | 4.35997000  | -0.61258300 | -1.36020000 |
| H  | 5.08284800  | -0.08764000 | -2.00212200 |
| H  | 4.86476300  | -0.81306500 | -0.41301300 |
| H  | 4.14754700  | -1.56969600 | -1.84027100 |
| C  | 1.83064800  | -0.47822000 | -3.35724700 |
| H  | 2.04521000  | 0.12346200  | -4.25244000 |
| H  | 2.48570400  | -1.35141200 | -3.39355300 |
| H  | 0.79761700  | -0.83439500 | -3.45724800 |
| C  | -1.04306200 | -2.59125500 | -0.97074200 |
| H  | -1.16215900 | -3.68374600 | -1.02109300 |
| H  | -2.00509400 | -2.17069700 | -0.67720500 |
| H  | -0.82865800 | -2.24559800 | -1.98974100 |

|   |             |             |             |
|---|-------------|-------------|-------------|
| C | 1.95408800  | -3.30346700 | -1.34465800 |
| H | 1.74117800  | -4.36793000 | -1.16371100 |
| H | 1.48319100  | -3.04509200 | -2.29663800 |
| H | 3.03580200  | -3.21572100 | -1.46624700 |
| C | 3.55288100  | -2.46598500 | 1.35049300  |
| H | 3.60206800  | -3.28276600 | 2.08455900  |
| H | 4.12679900  | -2.78313400 | 0.47702300  |
| H | 4.06812900  | -1.60835300 | 1.79909000  |
| C | 1.45194100  | -1.46933800 | 3.41028500  |
| H | 1.56931600  | -2.42430600 | 3.94530800  |
| H | 2.37414000  | -0.89591100 | 3.54495800  |
| H | 0.65041600  | -0.90466600 | 3.88855700  |
| C | -1.41773700 | -1.45894100 | 2.04818900  |
| H | -1.65116900 | -2.25884200 | 2.76503200  |
| H | -1.35967600 | -0.51755100 | 2.60483700  |
| H | -2.25595200 | -1.39172600 | 1.35050800  |
| O | -1.16378400 | 0.56327400  | -0.37730900 |
| C | -1.86916300 | 1.49174000  | 0.01797600  |
| C | -4.09159100 | 0.33881300  | -0.14320000 |
| C | -1.86736700 | 3.59845700  | 1.21290000  |
| C | -5.21828000 | 0.12868000  | 0.66101100  |
| C | -3.89553300 | -0.43685900 | -1.29077300 |
| H | -1.10347600 | 4.36279100  | 1.34987100  |
| H | -2.79008500 | 4.07676600  | 0.85519500  |
| H | -2.02836100 | 3.08102600  | 2.16218800  |
| C | -6.14549100 | -0.85474400 | 0.31943500  |
| H | -5.36147700 | 0.73098900  | 1.55489000  |
| C | -4.82217500 | -1.42854600 | -1.61480700 |
| H | -3.02656100 | -0.26476200 | -1.91354500 |
| C | -5.94874400 | -1.64065300 | -0.81779200 |
| H | -7.01697100 | -1.01011800 | 0.94904100  |
| H | -4.66335600 | -2.03161800 | -2.50435600 |
| H | -6.66785200 | -2.41071000 | -1.08120100 |
| N | -3.22204200 | 1.41258700  | 0.19461000  |
| H | -3.68133100 | 2.23778400  | 0.55206700  |
| O | -1.32899400 | 2.69858500  | 0.23977000  |

**Cp\*<sub>2</sub>Ti<sup>IV</sup>Cl-Methyl *N*-phenyl carbamate aza-enolate-LANL2DZ (Entry 20)**

|                                              |              |
|----------------------------------------------|--------------|
| E(UB3LYP)                                    | -1813.487695 |
| Zero-point correction=                       | 0.600296     |
| Thermal correction to Energy=                | 0.639029     |
| Thermal correction to Enthalpy=              | 0.639973     |
| Thermal correction to Gibbs Free Energy=     | 0.531992     |
| Sum of electronic and zero-point Energies=   | -1812.887399 |
| Sum of electronic and thermal Energies=      | -1812.848666 |
| Sum of electronic and thermal Enthalpies=    | -1812.847722 |
| Sum of electronic and thermal Free Energies= | -1812.955703 |

Charge = 0; Multiplicity = 1

|    |             |             |             |
|----|-------------|-------------|-------------|
| Ti | 0.96548000  | 0.01318000  | 0.15853000  |
| C  | 1.30357800  | -1.70775300 | 1.96625400  |
| C  | -0.05984300 | -1.70968000 | 1.57589200  |
| C  | -0.13025500 | -2.16306300 | 0.22300800  |
| C  | 1.19545200  | -2.43915800 | -0.21683600 |
| C  | 2.09216200  | -2.10063100 | 0.84595800  |
| C  | 1.85952100  | 2.10467800  | -0.87142300 |
| C  | 0.80247000  | 1.64938700  | -1.68920500 |
| C  | 1.16328500  | 0.37536600  | -2.22843000 |
| C  | 2.50147200  | 0.09132900  | -1.80367700 |
| C  | 2.90479900  | 1.12259800  | -0.91501500 |
| Cl | 1.69939500  | 1.22959300  | 2.03442000  |
| C  | -0.41757900 | 2.42757400  | -2.07531900 |
| H  | -0.25016900 | 2.92500600  | -3.04157200 |
| H  | -1.29237400 | 1.78284600  | -2.18798200 |
| H  | -0.65583400 | 3.19846700  | -1.34029800 |
| C  | 1.93631800  | 3.44869700  | -0.21033800 |
| H  | 2.15278300  | 4.22252200  | -0.96095100 |
| H  | 0.99474900  | 3.69879100  | 0.28354900  |
| H  | 2.72433000  | 3.47922800  | 0.54383400  |
| C  | 4.26251100  | 1.27382000  | -0.29042100 |
| H  | 4.86893200  | 1.99766400  | -0.85283300 |
| H  | 4.18597700  | 1.63133000  | 0.74062900  |
| H  | 4.81088600  | 0.32736400  | -0.27933800 |
| C  | 3.44319600  | -0.88826400 | -2.44538700 |
| H  | 4.06691700  | -0.34697800 | -3.17104300 |
| H  | 4.12574800  | -1.36055200 | -1.73504600 |
| H  | 2.92223300  | -1.67197300 | -2.99521700 |
| C  | 0.36509000  | -0.33785000 | -3.28637200 |
| H  | 0.31887100  | 0.26615900  | -4.20332500 |
| H  | 0.80621500  | -1.29935300 | -3.55850700 |
| H  | -0.66749700 | -0.51935300 | -2.96881400 |
| C  | -1.38565600 | -2.47601000 | -0.53632600 |
| H  | -1.79493500 | -3.44424400 | -0.21463900 |
| H  | -2.15745800 | -1.72142200 | -0.37565500 |
| H  | -1.20226000 | -2.54290300 | -1.61298000 |



|   |             |             |             |
|---|-------------|-------------|-------------|
| C | 1.51855000  | -3.30373700 | -1.40405900 |
| H | 1.19436900  | -4.33121900 | -1.18576300 |
| H | 0.99961900  | -2.99962000 | -2.31640600 |
| H | 2.58792600  | -3.34475600 | -1.61355200 |
| C | 3.57072000  | -2.36734300 | 0.92228800  |
| H | 3.77231800  | -3.21145900 | 1.59637000  |
| H | 3.99624400  | -2.62574100 | -0.04958700 |
| H | 4.12262200  | -1.50662700 | 1.31558100  |
| C | 1.81845900  | -1.51769100 | 3.35969400  |
| H | 1.87539600  | -2.49676100 | 3.85883900  |
| H | 2.81713800  | -1.07449700 | 3.37223700  |
| H | 1.16391700  | -0.87451700 | 3.95133600  |
| C | -1.21616100 | -1.39539100 | 2.47732400  |
| H | -1.38453000 | -2.21846600 | 3.18582500  |
| H | -1.03143400 | -0.48828500 | 3.06276700  |
| H | -2.13717300 | -1.25076800 | 1.91060500  |
| O | -0.90266700 | 0.57831400  | 0.23896000  |
| C | -1.74005700 | 1.51458200  | 0.61338700  |
| C | -3.77446000 | 0.45189300  | 0.02250700  |
| C | -1.95721400 | 3.63057200  | 1.66445300  |
| C | -4.56922100 | -0.34400500 | 0.87020700  |
| C | -3.86732700 | 0.23547200  | -1.36559700 |
| H | -1.27385900 | 4.38423000  | 2.06127900  |
| H | -2.59518500 | 4.05862800  | 0.88520200  |
| H | -2.59642700 | 3.23666200  | 2.45939500  |
| C | -5.39213800 | -1.34298300 | 0.35133400  |
| H | -4.53184100 | -0.15647100 | 1.93967300  |
| C | -4.69861500 | -0.75994400 | -1.88001700 |
| H | -3.29680900 | 0.87076400  | -2.03663000 |
| C | -5.46071300 | -1.56178900 | -1.02711900 |
| H | -5.98980500 | -1.94830400 | 1.02883000  |
| H | -4.75391100 | -0.90593300 | -2.95648300 |
| H | -6.10790400 | -2.33555800 | -1.43074500 |
| N | -3.02383100 | 1.49817800  | 0.56515900  |
| O | -1.11749400 | 2.60315500  | 1.13378000  |

**Cp<sub>2</sub>Ti<sup>III</sup>Cl-LANL2DZ (Entry 21)**

|                                              |             |
|----------------------------------------------|-------------|
| E(UB3LYP)                                    | -905.459237 |
| Zero-point correction=                       | 0.170342    |
| Thermal correction to Energy=                | 0.180766    |
| Thermal correction to Enthalpy=              | 0.181710    |
| Thermal correction to Gibbs Free Energy=     | 0.132935    |
| Sum of electronic and zero-point Energies=   | -905.288895 |
| Sum of electronic and thermal Energies=      | -905.278471 |
| Sum of electronic and thermal Enthalpies=    | -905.277527 |
| Sum of electronic and thermal Free Energies= | -905.326301 |

Charge = 0; Multiplicity = 1

|    |             |             |             |
|----|-------------|-------------|-------------|
| Ti | -0.00038200 | 0.10977400  | -0.00257600 |
| C  | 2.31899900  | 0.36140200  | 0.53130100  |
| C  | 1.83506700  | -0.78900700 | 1.20622900  |
| C  | 1.47163900  | -1.74306300 | 0.21919400  |
| C  | 1.71045300  | -1.17409100 | -1.06156300 |
| C  | 2.24116000  | 0.12453000  | -0.86404600 |
| C  | -2.20709200 | 0.08301300  | 0.94030400  |
| C  | -1.70218900 | -1.23859500 | 1.00438200  |
| C  | -1.51794200 | -1.69834400 | -0.32810600 |
| C  | -1.89187400 | -0.65526500 | -1.21505100 |
| C  | -2.32548700 | 0.44224100  | -0.42623300 |
| H  | 2.63253000  | 1.28573700  | 0.99575700  |
| H  | 1.76978800  | -0.92126300 | 2.27884100  |
| H  | 1.07744500  | -2.73136600 | 0.41205200  |
| H  | 1.52387800  | -1.64985100 | -2.01615800 |
| H  | 2.48994000  | 0.83762600  | -1.63918000 |
| H  | -2.41870800 | 0.72772300  | 1.78370900  |
| H  | -1.49155100 | -1.79863000 | 1.90679300  |
| H  | -1.15116500 | -2.67315300 | -0.61957200 |
| H  | -1.86499200 | -0.69439800 | -2.29674600 |
| H  | -2.63560900 | 1.40830500  | -0.79799100 |
| Cl | 0.02826200  | 2.44219500  | 0.00062900  |

## Cp<sub>2</sub>Ti<sup>IV</sup>Cl(TEMPO)-LANL2DZ (Entry 22)

|                                              |              |
|----------------------------------------------|--------------|
| E(UB3LYP)                                    | -1389.197149 |
| Zero-point correction=                       | 0.436726     |
| Thermal correction to Energy=                | 0.460790     |
| Thermal correction to Enthalpy=              | 0.461734     |
| Thermal correction to Gibbs Free Energy=     | 0.385831     |
| Sum of electronic and zero-point Energies=   | -1388.760424 |
| Sum of electronic and thermal Energies=      | -1388.736359 |
| Sum of electronic and thermal Enthalpies=    | -1388.735415 |
| Sum of electronic and thermal Free Energies= | -1388.811318 |

Charge = 0; Multiplicity = 1

|    |             |             |             |
|----|-------------|-------------|-------------|
| Ti | 1.45991100  | 0.04211200  | 0.00402900  |
| C  | 1.41832900  | 1.75813400  | 1.70934800  |
| C  | 0.64228000  | 0.68110300  | 2.17509300  |
| C  | 1.50025100  | -0.44006700 | 2.33305600  |
| C  | 2.82536000  | -0.01986500 | 2.03422100  |
| C  | 2.77245700  | 1.32258800  | 1.61235600  |
| C  | 1.68314600  | -1.29079700 | -2.06635300 |
| C  | 1.45838000  | -2.20246700 | -1.01411800 |
| C  | 2.55338200  | -2.12283500 | -0.11988900 |
| C  | 3.49113100  | -1.19353300 | -0.65844600 |
| C  | 2.94996400  | -0.68288400 | -1.85415400 |
| H  | 1.05214400  | 2.73030500  | 1.41759300  |
| H  | -0.43525700 | 0.66357400  | 2.25795700  |
| H  | 1.20230700  | -1.42586400 | 2.66460300  |
| H  | 3.71127500  | -0.63745000 | 2.07919100  |
| H  | 3.60149900  | 1.91545400  | 1.25046600  |
| H  | 0.99659100  | -1.05474800 | -2.86777600 |
| H  | 0.57408600  | -2.80635200 | -0.87383600 |
| H  | 2.67586000  | -2.70389900 | 0.78456300  |
| H  | 4.44126000  | -0.91329100 | -0.22475600 |
| H  | 3.39464600  | 0.08064800  | -2.47417800 |
| Cl | 1.76394300  | 2.02044000  | -1.32851000 |
| O  | -0.35736000 | -0.16886400 | -0.27309600 |
| C  | -3.76176700 | 1.29152600  | 0.16449000  |
| C  | -3.77944100 | -1.09352800 | 0.84391500  |
| C  | -4.55237900 | -0.01229300 | 0.09249000  |
| H  | -4.27025000 | 2.09282700  | -0.38542800 |
| H  | -3.71195000 | 1.61164600  | 1.21438200  |
| H  | -4.30030500 | -2.05826000 | 0.80144400  |
| H  | -3.71920500 | -0.81077600 | 1.90375400  |
| H  | -5.54389500 | 0.12312400  | 0.54248200  |
| H  | -4.72591800 | -0.30675200 | -0.94990900 |
| C  | -1.59280800 | 2.48444300  | 0.04039700  |
| H  | -1.52779700 | 2.55027700  | 1.13173000  |
| H  | -0.59154500 | 2.55019800  | -0.38684600 |

|   |             |             |             |
|---|-------------|-------------|-------------|
| H | -2.16588400 | 3.34948300  | -0.31411400 |
| C | -2.37609300 | -2.03510900 | -1.05547400 |
| H | -1.41272200 | -1.94483900 | -1.56094000 |
| H | -2.58823900 | -3.09994200 | -0.90226800 |
| H | -3.14486900 | -1.64541400 | -1.72641800 |
| C | -2.34405200 | -1.30672000 | 0.30906800  |
| C | -1.60657700 | -2.19730800 | 1.32916300  |
| H | -0.60001500 | -2.45628700 | 0.99367600  |
| H | -1.52941100 | -1.68858200 | 2.29582600  |
| H | -2.16333000 | -3.12988900 | 1.47684100  |
| N | -1.64680400 | 0.02707300  | 0.29853000  |
| C | -2.31726500 | 1.19379600  | -0.38349000 |
| C | -2.30490100 | 1.12156500  | -1.92616800 |
| H | -2.65135400 | 2.07745100  | -2.33572100 |
| H | -1.28844200 | 0.95128200  | -2.28875900 |
| H | -2.95420900 | 0.33902900  | -2.32548800 |

### ***N*-phenyl propanamide-CPCM (Entry 23)**

|                                              |             |
|----------------------------------------------|-------------|
| E (UB3LYP)                                   | -479.589123 |
| Zero-point correction=                       | 0.184534    |
| Thermal correction to Energy=                | 0.194920    |
| Thermal correction to Enthalpy=              | 0.195864    |
| Thermal correction to Gibbs Free Energy=     | 0.147089    |
| Sum of electronic and zero-point Energies=   | -479.404590 |
| Sum of electronic and thermal Energies=      | -479.394203 |
| Sum of electronic and thermal Enthalpies=    | -479.393259 |
| Sum of electronic and thermal Free Energies= | -479.442034 |

Charge = 0; Multiplicity = 1

|   |             |             |             |
|---|-------------|-------------|-------------|
| C | -0.79297500 | -0.29823800 | -0.00710100 |
| C | -1.21785600 | 1.04054800  | -0.01975700 |
| C | -1.75330900 | -1.32423600 | 0.02742200  |
| C | -2.58407400 | 1.32867200  | 0.00056700  |
| H | -0.48291200 | 1.83204800  | -0.04477600 |
| N | 0.56355100  | -0.68663400 | -0.02676800 |
| C | -3.11207800 | -1.01989000 | 0.04757400  |
| H | -1.42995300 | -2.36270400 | 0.03813000  |
| C | -3.53863400 | 0.31081700  | 0.03424700  |
| H | -2.90014000 | 2.36861100  | -0.01007600 |
| C | 1.69650200  | 0.09022000  | -0.06688400 |
| H | 0.71711600  | -1.68753900 | -0.03049000 |
| H | -3.83777200 | -1.82819100 | 0.07375900  |
| H | -4.59819500 | 0.54900000  | 0.04998600  |
| C | 2.99160200  | -0.71754300 | -0.14750200 |
| O | 1.68289500  | 1.31939500  | -0.06026000 |
| C | 4.22817800  | 0.11065600  | 0.19807500  |
| H | 2.91773400  | -1.59500200 | 0.50698500  |
| H | 3.07262700  | -1.10941100 | -1.17129600 |
| H | 5.13308000  | -0.49368800 | 0.08022300  |
| H | 4.18872100  | 0.46814500  | 1.23234500  |
| H | 4.30753700  | 0.98397000  | -0.45517500 |

### ***N*-phenyl propanamidyl radical-CPCM (Entry 24)**

|                                              |             |
|----------------------------------------------|-------------|
| E(UB3LYP)                                    | -478.931093 |
| Zero-point correction=                       | 0.170223    |
| Thermal correction to Energy=                | 0.180573    |
| Thermal correction to Enthalpy=              | 0.181517    |
| Thermal correction to Gibbs Free Energy=     | 0.132344    |
| Sum of electronic and zero-point Energies=   | -478.760870 |
| Sum of electronic and thermal Energies=      | -478.750520 |
| Sum of electronic and thermal Enthalpies=    | -478.749575 |
| Sum of electronic and thermal Free Energies= | -478.798749 |

Charge = 0; Multiplicity = 2

|   |             |             |             |
|---|-------------|-------------|-------------|
| C | 1.65012900  | -0.14307000 | 0.33382500  |
| O | 1.77142800  | 0.70403600  | 1.21548000  |
| N | 0.50654600  | -0.92007200 | 0.19155100  |
| C | -0.72497400 | -0.39716300 | 0.07459500  |
| C | -1.00525500 | 0.99464300  | -0.13451100 |
| C | -1.83029700 | -1.30760200 | 0.11913900  |
| C | -2.31033700 | 1.42824700  | -0.27838400 |
| H | -0.18298900 | 1.69998100  | -0.16929100 |
| C | -3.12849200 | -0.85417100 | -0.02544700 |
| H | -1.61103200 | -2.35962600 | 0.27143300  |
| C | -3.37806900 | 0.51438200  | -0.22497400 |
| H | -2.51319900 | 2.48339200  | -0.43676100 |
| H | -3.95664700 | -1.55543400 | 0.01331400  |
| H | -4.39810900 | 0.86799500  | -0.34092300 |
| C | 2.77565000  | -0.53023000 | -0.61142800 |
| H | 2.98911300  | -1.59527200 | -0.45183400 |
| H | 2.38808600  | -0.46380500 | -1.63756900 |
| C | 4.03470900  | 0.31728000  | -0.43977500 |
| H | 4.80702600  | -0.00391900 | -1.14597800 |
| H | 3.82640100  | 1.37684600  | -0.61945400 |
| H | 4.43571800  | 0.22416000  | 0.57411700  |

### Methyl N-phenylcarbamate-CPCM (Entry 25)

|                                              |             |
|----------------------------------------------|-------------|
| E(UB3LYP)                                    | -515.498507 |
| Zero-point correction=                       | 0.160934    |
| Thermal correction to Energy=                | 0.171033    |
| Thermal correction to Enthalpy=              | 0.171977    |
| Thermal correction to Gibbs Free Energy=     | 0.123979    |
| Sum of electronic and zero-point Energies=   | -515.337573 |
| Sum of electronic and thermal Energies=      | -515.327474 |
| Sum of electronic and thermal Enthalpies=    | -515.326530 |
| Sum of electronic and thermal Free Energies= | -515.374528 |

Charge = 0; Multiplicity = 1

|   |             |             |             |
|---|-------------|-------------|-------------|
| C | 1.71827700  | 0.09214700  | -0.00017600 |
| O | 1.75549400  | 1.31288200  | -0.00003800 |
| C | -0.75325800 | -0.30420500 | -0.00011000 |
| C | -1.17046500 | 1.03600000  | 0.00004000  |
| C | -1.71686200 | -1.32679000 | -0.00016600 |
| C | -2.53528000 | 1.33062900  | 0.00013600  |
| H | -0.43323100 | 1.82661200  | 0.00007300  |
| C | -3.07430700 | -1.01548700 | -0.00006800 |
| H | -1.39729400 | -2.36628000 | -0.00029200 |
| C | -3.49491700 | 0.31701600  | 0.00008500  |
| H | -2.84586000 | 2.37221000  | 0.00025500  |
| H | -3.80370900 | -1.82083500 | -0.00011200 |
| H | -4.55343800 | 0.55997000  | 0.00016100  |
| C | 4.07652900  | -0.01220300 | 0.00030200  |
| H | 4.83429200  | -0.79547500 | 0.00034400  |
| H | 4.17493900  | 0.61117100  | -0.89189300 |
| H | 4.17470300  | 0.61103100  | 0.89262300  |
| O | 2.81619600  | -0.70342300 | 0.00007900  |
| N | 0.59982500  | -0.69757500 | -0.00022600 |
| H | 0.77900400  | -1.69369700 | -0.00015400 |

### Methyl *N*-phenylcarbamyl radical-CPCM (Entry 26)

|                                              |             |
|----------------------------------------------|-------------|
| E(UB3LYP)                                    | -514.842259 |
| Zero-point correction=                       | 0.147331    |
| Thermal correction to Energy=                | 0.157202    |
| Thermal correction to Enthalpy=              | 0.158147    |
| Thermal correction to Gibbs Free Energy=     | 0.110354    |
| Sum of electronic and zero-point Energies=   | -514.694928 |
| Sum of electronic and thermal Energies=      | -514.685056 |
| Sum of electronic and thermal Enthalpies=    | -514.684112 |
| Sum of electronic and thermal Free Energies= | -514.731904 |

Charge = 0; Multiplicity = 2

|   |             |             |             |
|---|-------------|-------------|-------------|
| C | 1.67006700  | -0.11333600 | 0.29015500  |
| O | 1.82257900  | 0.77905800  | 1.11188800  |
| N | 0.54972400  | -0.92434900 | 0.16639600  |
| C | -0.68166100 | -0.39754500 | 0.06539400  |
| C | -0.97426100 | 0.99339100  | -0.13529200 |
| C | -1.78039300 | -1.31640200 | 0.12124300  |
| C | -2.28359800 | 1.41700300  | -0.26346600 |
| H | -0.15827700 | 1.70552300  | -0.17500700 |
| C | -3.08294300 | -0.87259700 | -0.00794300 |
| H | -1.55077900 | -2.36681000 | 0.26857400  |
| C | -3.34429800 | 0.49485200  | -0.20100500 |
| H | -2.49616100 | 2.47102100  | -0.41582800 |
| H | -3.90541300 | -1.57988100 | 0.03838300  |
| H | -4.36800900 | 0.84166100  | -0.30392300 |
| C | 3.88084500  | 0.18447100  | -0.47332000 |
| H | 4.51767300  | -0.25956200 | -1.23796900 |
| H | 3.73191000  | 1.24873700  | -0.67154500 |
| H | 4.32701100  | 0.05773100  | 0.51615100  |
| O | 2.63135000  | -0.52743300 | -0.55666300 |



**TEMPO-CPCM (Entry 27)**

|                                              |             |
|----------------------------------------------|-------------|
| E(UB3LYP)                                    | -483.724963 |
| Zero-point correction=                       | 0.263016    |
| Thermal correction to Energy=                | 0.275057    |
| Thermal correction to Enthalpy=              | 0.276001    |
| Thermal correction to Gibbs Free Energy=     | 0.226310    |
| Sum of electronic and zero-point Energies=   | -483.461947 |
| Sum of electronic and thermal Energies=      | -483.449906 |
| Sum of electronic and thermal Enthalpies=    | -483.448961 |
| Sum of electronic and thermal Free Energies= | -483.498652 |

Charge = 0; Multiplicity = 2

|   |             |             |             |
|---|-------------|-------------|-------------|
| C | -2.12281100 | 0.13477100  | 0.00000000  |
| C | -1.36007900 | 0.58495500  | 1.24680200  |
| C | 0.07292500  | 0.02057200  | 1.33293000  |
| C | 0.07292500  | 0.02057200  | -1.33293000 |
| C | -1.36007900 | 0.58495500  | -1.24680200 |
| H | -1.30695100 | 1.68211100  | 1.24616500  |
| H | -1.89219300 | 0.29612300  | 2.16102500  |
| H | -2.26633400 | -0.95294200 | 0.00000000  |
| H | -3.12569400 | 0.57768100  | 0.00000000  |
| H | -1.30695100 | 1.68211100  | -1.24616500 |
| H | -1.89219300 | 0.29612300  | -2.16102500 |
| N | 0.75919000  | 0.14825500  | 0.00000000  |
| O | 2.02850300  | -0.06749400 | 0.00000000  |
| C | 0.88490600  | 0.84172200  | 2.34803600  |
| H | 0.37926700  | 0.81864800  | 3.31932400  |
| H | 1.89199700  | 0.43722900  | 2.46710400  |
| H | 0.96473700  | 1.88578100  | 2.02655200  |
| C | 0.07292500  | -1.46277600 | 1.76033600  |
| H | 1.08750000  | -1.86718100 | 1.69706000  |
| H | -0.27176800 | -1.54979100 | 2.79658900  |
| H | -0.58338600 | -2.07535600 | 1.13551600  |
| C | 0.88490600  | 0.84172200  | -2.34803600 |
| H | 1.89199700  | 0.43722900  | -2.46710400 |
| H | 0.37926700  | 0.81864800  | -3.31932400 |
| H | 0.96473700  | 1.88578100  | -2.02655200 |
| C | 0.07292500  | -1.46277600 | -1.76033600 |
| H | 1.08750000  | -1.86718100 | -1.69706000 |
| H | -0.58338600 | -2.07535600 | -1.13551600 |
| H | -0.27176800 | -1.54979100 | -2.79658900 |

**Cp\*<sub>2</sub>Ti<sup>III</sup>Cl-CPCM (Entry 28)**

|                                              |              |
|----------------------------------------------|--------------|
| E(UB3LYP)                                    | -2089.979981 |
| Zero-point correction=                       | 0.448932     |
| Thermal correction to Energy=                | 0.477112     |
| Thermal correction to Enthalpy=              | 0.478056     |
| Thermal correction to Gibbs Free Energy=     | 0.392926     |
| Sum of electronic and zero-point Energies=   | -2089.531049 |
| Sum of electronic and thermal Energies=      | -2089.502869 |
| Sum of electronic and thermal Enthalpies=    | -2089.501925 |
| Sum of electronic and thermal Free Energies= | -2089.587055 |

Charge = 0; Multiplicity = 2

|    |             |             |             |
|----|-------------|-------------|-------------|
| Ti | -0.00003200 | -0.32474400 | -0.00021600 |
| C  | -2.35940100 | -0.71497000 | 0.46307400  |
| C  | -1.95349900 | 0.44813900  | 1.17976200  |
| C  | -1.63693400 | 1.46049300  | 0.22178400  |
| C  | -1.78829100 | 0.89954100  | -1.08699600 |
| C  | -2.23932300 | -0.44330600 | -0.93372500 |
| C  | 2.23866400  | -0.44275800 | 0.93477200  |
| C  | 1.78802800  | 0.90039800  | 1.08636500  |
| C  | 1.63746500  | 1.45999300  | -0.22309100 |
| C  | 1.95419000  | 0.44653700  | -1.17981500 |
| C  | 2.35940700  | -0.71593700 | -0.46167700 |
| Cl | -0.00039800 | -2.75251400 | -0.00018200 |
| C  | 2.95514100  | -1.94925600 | -1.07918400 |
| H  | 4.02174700  | -1.78570900 | -1.28865900 |
| H  | 2.87322200  | -2.81513300 | -0.41931100 |
| H  | 2.47346000  | -2.20855000 | -2.02721300 |
| C  | 2.59886300  | -1.37827200 | 2.05597300  |
| H  | 2.43407100  | -2.42264400 | 1.77723900  |
| H  | 3.65699400  | -1.27120900 | 2.33285500  |
| H  | 2.00875900  | -1.17645400 | 2.95619100  |
| C  | 1.68419000  | 1.63826400  | 2.39463800  |
| H  | 1.29767200  | 0.99948600  | 3.19550700  |
| H  | 2.67019900  | 1.99946800  | 2.71900900  |
| H  | 1.03077000  | 2.51179600  | 2.32395000  |
| C  | 2.04915600  | 0.63676000  | -2.67066800 |
| H  | 1.33396000  | 1.38029400  | -3.03485400 |
| H  | 3.05144000  | 0.98159100  | -2.96302700 |
| H  | 1.86011600  | -0.29678600 | -3.21051100 |
| C  | -1.52772700 | 2.92403000  | 0.55273300  |
| H  | -2.52981000 | 3.31809600  | 0.77429600  |
| H  | -0.91299400 | 3.11737900  | 1.43663800  |
| H  | -1.12906600 | 3.51316700  | -0.27430400 |
| C  | -1.68466300 | 1.63598500  | -2.39609000 |
| H  | -2.67053800 | 1.99777300  | -2.72022100 |
| H  | -1.03037500 | 2.50898300  | -2.32671700 |
| H  | -1.29923000 | 0.99602700  | -3.19653700 |
| C  | -2.60035500 | -1.37987200 | -2.05377200 |
| H  | -3.65842200 | -1.27228300 | -2.33069100 |
| H  | -2.01015800 | -1.17961000 | -2.95428100 |
| H  | -2.43634200 | -2.42402800 | -1.77380700 |
| C  | -2.95482200 | -1.94758900 | 1.08227100  |
| H  | -4.02126600 | -1.78375900 | 1.29234000  |
| H  | -2.87342000 | -2.81416900 | 0.42325400  |

|   |             |             |             |
|---|-------------|-------------|-------------|
| H | -2.47249100 | -2.20591900 | 2.03023900  |
| C | -2.04780600 | 0.63994400  | 2.67045300  |
| H | -3.05023100 | 0.98423700  | 2.96295800  |
| H | -1.85766300 | -0.29281800 | 3.21127200  |
| H | -1.33306500 | 1.38450900  | 3.03339600  |
| C | 1.52861400  | 2.92315700  | -0.55579300 |
| H | 1.13005800  | 3.51337400  | 0.27052300  |
| H | 2.53078400  | 3.31673800  | -0.77782000 |
| H | 0.91393100  | 3.11556900  | -1.43994500 |

**Cp\*<sub>2</sub>Ti<sup>IV</sup>Cl(TEMPO)-CPCM (Entry 29)**

|                                              |              |
|----------------------------------------------|--------------|
| E(UB3LYP)                                    | -2573.693774 |
| Zero-point correction=                       | 0.715756     |
| Thermal correction to Energy=                | 0.756206     |
| Thermal correction to Enthalpy=              | 0.757151     |
| Thermal correction to Gibbs Free Energy=     | 0.649762     |
| Sum of electronic and zero-point Energies=   | -2572.978018 |
| Sum of electronic and thermal Energies=      | -2572.937568 |
| Sum of electronic and thermal Enthalpies=    | -2572.936624 |
| Sum of electronic and thermal Free Energies= | -2573.044012 |

Charge = 0; Multiplicity = 1

|    |             |             |             |
|----|-------------|-------------|-------------|
| Ti | 0.77092500  | 0.05665500  | -0.16555100 |
| C  | 0.85413500  | 2.61723200  | -0.15063500 |
| C  | 0.19323400  | 2.23573800  | 1.03734700  |
| C  | 1.11217000  | 1.46508500  | 1.82572500  |
| C  | 2.38350900  | 1.50269900  | 1.16971900  |
| C  | 2.20643400  | 2.12595000  | -0.08743900 |
| C  | 0.98633100  | -2.35042700 | -0.98607700 |
| C  | 0.90211400  | -2.45359900 | 0.42143800  |
| C  | 2.05595400  | -1.82816800 | 0.98769900  |
| C  | 2.91156300  | -1.43307700 | -0.09221900 |
| C  | 2.24332000  | -1.73288700 | -1.30040000 |
| Cl | 0.75874700  | 0.59434500  | -2.56721000 |
| O  | -1.06492800 | -0.26205000 | -0.07533700 |
| C  | -4.57045000 | 0.93738300  | -0.76024100 |
| C  | -4.50703900 | -0.25876800 | 1.40179000  |
| C  | -5.32648900 | -0.03838300 | 0.13447400  |
| H  | -5.09803500 | 1.09544200  | -1.70909400 |
| H  | -4.53702100 | 1.91164200  | -0.25419600 |
| H  | -4.99276100 | -0.97964300 | 2.07164000  |
| H  | -4.44091400 | 0.69058600  | 1.95014300  |
| H  | -6.31210500 | 0.37195900  | 0.38757500  |
| H  | -5.51343800 | -0.98538300 | -0.38584700 |
| C  | -2.46449900 | 1.77445200  | -1.71691200 |
| H  | -2.46814800 | 2.59626600  | -0.99661600 |
| H  | -1.44239800 | 1.58515000  | -2.03701000 |
| H  | -3.04615600 | 2.09053700  | -2.59167300 |
| C  | -3.14370300 | -2.23283100 | 0.60850200  |
| H  | -2.24889600 | -2.47640900 | 0.04059400  |
| H  | -3.21595400 | -2.92859400 | 1.45157400  |
| H  | -4.01057500 | -2.41004400 | -0.03221100 |
| C  | -3.07501700 | -0.77457800 | 1.12048700  |
| C  | -2.31015400 | -0.71840600 | 2.45321300  |
| H  | -1.26700600 | -1.00670800 | 2.32718900  |
| H  | -2.33722400 | 0.29496900  | 2.86546100  |
| H  | -2.77328100 | -1.39555300 | 3.17948500  |
| N  | -2.40533400 | 0.19327200  | 0.18213400  |
| C  | -3.11499300 | 0.52464200  | -1.10627000 |
| C  | -3.08951900 | -0.60327600 | -2.15976300 |
| H  | -3.45408600 | -0.21406800 | -3.11771000 |
| H  | -2.06693900 | -0.95756700 | -2.30311600 |
| H  | -3.71789600 | -1.45519400 | -1.89148500 |
| C  | -0.01114300 | -3.34711400 | 1.21159000  |
| H  | 0.58506100  | -4.15429400 | 1.66123500  |

|   |             |             |             |
|---|-------------|-------------|-------------|
| H | -0.52650400 | -2.84427700 | 2.03334500  |
| H | -0.76572900 | -3.81981100 | 0.58207900  |
| C | 0.05464300  | -2.94927700 | -1.99978900 |
| H | 0.43782700  | -3.91187500 | -2.36764700 |
| H | -0.93970800 | -3.13065900 | -1.58492100 |
| H | -0.06168500 | -2.29247100 | -2.86748100 |
| C | 2.88779400  | -1.69600000 | -2.65485700 |
| H | 3.53291400  | -2.57928500 | -2.77654100 |
| H | 2.15085800  | -1.70772100 | -3.45941100 |
| H | 3.51810500  | -0.81191100 | -2.78967600 |
| C | 4.38372100  | -1.12806700 | -0.02982500 |
| H | 4.94230600  | -1.97114700 | -0.46058700 |
| H | 4.66928800  | -0.24199700 | -0.60599000 |
| H | 4.74160100  | -0.99863800 | 0.99173200  |
| C | 2.44440700  | -2.02835500 | 2.42751300  |
| H | 2.71068600  | -3.08271200 | 2.59364900  |
| H | 3.31093800  | -1.43534300 | 2.72331900  |
| H | 1.62528800  | -1.79994500 | 3.11584900  |
| C | 0.89552500  | 1.10134000  | 3.27054000  |
| H | 0.93839500  | 2.00305400  | 3.89906300  |
| H | -0.07816200 | 0.63725400  | 3.44239800  |
| H | 1.66239400  | 0.41743100  | 3.63959200  |
| C | 3.70044900  | 1.33218300  | 1.87238800  |
| H | 3.86318400  | 2.22272900  | 2.49702100  |
| H | 3.73763900  | 0.47354400  | 2.54323900  |
| H | 4.54196600  | 1.27032900  | 1.18269900  |
| C | 3.27716700  | 2.49708500  | -1.07370200 |
| H | 3.55202200  | 3.55588400  | -0.96348000 |
| H | 4.18888500  | 1.90977200  | -0.93594700 |
| H | 2.93352700  | 2.35285900  | -2.10226500 |
| C | 0.38496700  | 3.60192600  | -1.18138700 |
| H | 1.03090900  | 4.49061000  | -1.16354800 |
| H | 0.43038500  | 3.18600600  | -2.19218300 |
| H | -0.63885400 | 3.93169200  | -0.99577200 |
| C | -1.13581600 | 2.73570300  | 1.52944300  |
| H | -1.37818700 | 3.69777100  | 1.06611600  |
| H | -1.94486000 | 2.03670900  | 1.30386800  |
| H | -1.10163300 | 2.89305000  | 2.61385400  |

**Cp\*<sub>2</sub>Ti<sup>III</sup>Cl-N-phenyl propanamide-CPCM (Entry 30)**

|                                              |              |
|----------------------------------------------|--------------|
| E(UB3LYP)                                    | -2569.564138 |
| Zero-point correction=                       | 0.635846     |
| Thermal correction to Energy=                | 0.675531     |
| Thermal correction to Enthalpy=              | 0.676475     |
| Thermal correction to Gibbs Free Energy=     | 0.565333     |
| Sum of electronic and zero-point Energies=   | -2568.928292 |
| Sum of electronic and thermal Energies=      | -2568.888607 |
| Sum of electronic and thermal Enthalpies=    | -2568.887663 |
| Sum of electronic and thermal Free Energies= | -2568.998805 |

Charge = 0; Multiplicity = 2

|    |             |             |             |
|----|-------------|-------------|-------------|
| Ti | 1.12075300  | 0.13861500  | 0.00087900  |
| C  | 1.38792600  | 0.64256700  | 2.44847300  |
| C  | 0.26218900  | -0.21862200 | 2.36370700  |
| C  | 0.69497300  | -1.47415900 | 1.84876500  |
| C  | 2.10989600  | -1.39515700 | 1.65104900  |
| C  | 2.53366600  | -0.07313700 | 1.98368300  |
| C  | 1.03871700  | 0.46698500  | -2.41342700 |
| C  | 0.35513500  | -0.76618500 | -2.18868000 |
| C  | 1.29522000  | -1.71183500 | -1.70265600 |
| C  | 2.57810300  | -1.07064900 | -1.65585100 |
| C  | 2.41833300  | 0.26688000  | -2.10107600 |
| Cl | 1.72524900  | 2.61718900  | -0.00382900 |
| C  | -1.05286900 | -1.06960600 | -2.61536800 |
| H  | -1.07622500 | -1.32802600 | -3.68422200 |
| H  | -1.47753700 | -1.91693800 | -2.07117000 |
| H  | -1.72239000 | -0.21745900 | -2.47439900 |
| C  | 0.45013600  | 1.68260600  | -3.07284300 |
| H  | 0.55764300  | 1.62758100  | -4.16610400 |
| H  | -0.61976500 | 1.78011600  | -2.86241900 |
| H  | 0.94216200  | 2.59778900  | -2.73450400 |
| C  | 3.54752800  | 1.21362700  | -2.39687400 |
| H  | 3.97032700  | 1.00548300  | -3.39117500 |
| H  | 3.21544700  | 2.25334800  | -2.38371800 |
| H  | 4.36516600  | 1.11706300  | -1.67449200 |
| C  | 3.91708400  | -1.74085500 | -1.50018700 |
| H  | 4.40861100  | -1.81931000 | -2.48050600 |
| H  | 4.59912200  | -1.17897300 | -0.85291400 |
| H  | 3.83378600  | -2.75346200 | -1.10194200 |
| C  | 1.02896300  | -3.18750800 | -1.57544200 |
| H  | 1.10774600  | -3.67526800 | -2.55814500 |
| H  | 1.74126200  | -3.68976700 | -0.91721200 |
| H  | 0.02311000  | -3.39553300 | -1.19867500 |
| C  | -0.11772700 | -2.74182100 | 1.83555600  |
| H  | -0.07830900 | -3.23736400 | 2.81712900  |
| H  | -1.17392800 | -2.55605700 | 1.61957500  |
| H  | 0.24942700  | -3.46257900 | 1.10092600  |
| C  | 3.02224200  | -2.58513400 | 1.53231800  |
| H  | 3.15785200  | -3.03310100 | 2.52795600  |
| H  | 2.62304300  | -3.37169600 | 0.88818900  |
| H  | 4.01531100  | -2.31792100 | 1.16699100  |
| C  | 3.95545100  | 0.41751300  | 2.04075600  |
| H  | 4.39383800  | 0.26329500  | 3.03756600  |
| H  | 4.59681800  | -0.10657100 | 1.32469300  |

|   |             |             |             |
|---|-------------|-------------|-------------|
| H | 4.01733700  | 1.48719200  | 1.81873000  |
| C | 1.39760200  | 1.98512400  | 3.12260500  |
| H | 1.45030200  | 1.85746800  | 4.21413600  |
| H | 2.25417300  | 2.58656700  | 2.81383100  |
| H | 0.49549900  | 2.56626300  | 2.90700500  |
| C | -1.10545700 | 0.09369900  | 2.90193300  |
| H | -1.15373100 | -0.13688800 | 3.97606100  |
| H | -1.35882900 | 1.15304400  | 2.79398700  |
| H | -1.88863100 | -0.48940200 | 2.41149300  |
| O | -1.05379000 | 0.73137300  | -0.05775500 |
| C | -1.95529600 | 1.59390400  | -0.05262900 |
| C | -3.93392500 | 0.01545900  | -0.04633600 |
| C | -2.79946400 | 4.07290900  | -0.15788700 |
| C | -5.33536400 | 0.04434800  | -0.13275000 |
| C | -3.27273700 | -1.21552800 | 0.06102200  |
| H | -2.40224600 | 5.09247100  | -0.15238800 |
| H | -3.34568000 | 3.94430300  | -1.09964200 |
| H | -3.51052300 | 4.00496400  | 0.67418800  |
| C | -6.06543000 | -1.14110900 | -0.11137700 |
| H | -5.85230900 | 0.99725100  | -0.21722800 |
| C | -4.01827700 | -2.39654300 | 0.08080600  |
| H | -2.19531600 | -1.23995400 | 0.11784100  |
| C | -5.41080000 | -2.37109600 | -0.00456900 |
| H | -7.14874600 | -1.10016700 | -0.17926100 |
| H | -3.49588800 | -3.34582100 | 0.16275700  |
| H | -5.97954500 | -3.29601100 | 0.01131500  |
| N | -3.27267300 | 1.26757500  | -0.06145700 |
| H | -3.90322800 | 2.05847800  | -0.07868600 |
| C | -1.64051000 | 3.08106900  | -0.02229200 |
| H | -0.89538800 | 3.24785500  | -0.80406700 |
| H | -1.09837600 | 3.25551200  | 0.91389200  |

### Cp\*<sub>2</sub>Ti<sup>IV</sup>Cl-*N*-phenyl propanamide aza-enolate – CPCM (Entry 31)

|                                              |              |
|----------------------------------------------|--------------|
| E(UB3LYP)                                    | -2568.962201 |
| Zero-point correction=                       | 0.623164     |
| Thermal correction to Energy=                | 0.662336     |
| Thermal correction to Enthalpy=              | 0.663281     |
| Thermal correction to Gibbs Free Energy=     | 0.554136     |
| Sum of electronic and zero-point Energies=   | -2568.339036 |
| Sum of electronic and thermal Energies=      | -2568.299864 |
| Sum of electronic and thermal Enthalpies=    | -2568.298920 |
| Sum of electronic and thermal Free Energies= | -2568.408065 |

Charge = 0; Multiplicity = 1

|    |             |             |             |
|----|-------------|-------------|-------------|
| Ti | 0.95044400  | 0.08934400  | 0.12782900  |
| C  | 1.38420000  | -1.00830800 | 2.35470300  |
| C  | 0.01659300  | -1.17505400 | 2.02612500  |
| C  | -0.05925900 | -2.00042300 | 0.86065600  |
| C  | 1.26926700  | -2.36453100 | 0.49430900  |
| C  | 2.16918000  | -1.69098200 | 1.37460700  |
| C  | 1.75953000  | 1.75168300  | -1.59187800 |
| C  | 0.63303200  | 1.09704300  | -2.13462600 |
| C  | 0.93926900  | -0.29498000 | -2.26687100 |
| C  | 2.31260300  | -0.46879900 | -1.88822000 |
| C  | 2.79481100  | 0.77591800  | -1.40972900 |
| Cl | 1.95126400  | 1.81122400  | 1.49539000  |
| C  | -0.60056100 | 1.77865900  | -2.64391500 |
| H  | -0.35292800 | 2.37644400  | -3.53112600 |
| H  | -1.36181400 | 1.05625600  | -2.94105900 |
| H  | -1.04487800 | 2.45735200  | -1.91069200 |
| C  | 1.92266300  | 3.23514100  | -1.44446300 |
| H  | 2.41657300  | 3.64410400  | -2.33723600 |
| H  | 0.95918300  | 3.74299100  | -1.34496700 |
| H  | 2.53437200  | 3.49357500  | -0.57754800 |
| C  | 4.21249300  | 1.08016900  | -1.01965500 |
| H  | 4.77638700  | 1.44586900  | -1.88938300 |
| H  | 4.25700600  | 1.85270900  | -0.24746300 |
| H  | 4.73300000  | 0.19476200  | -0.64421000 |
| C  | 3.20735500  | -1.60726300 | -2.29243300 |
| H  | 3.76260500  | -1.30148400 | -3.19019300 |
| H  | 3.95365100  | -1.86279900 | -1.53638600 |
| H  | 2.65411900  | -2.50887900 | -2.55207100 |
| C  | 0.07216100  | -1.28850900 | -2.99357700 |
| H  | 0.10249000  | -1.10281000 | -4.07599000 |
| H  | 0.40211500  | -2.31744800 | -2.83663400 |
| H  | -0.97584400 | -1.22518200 | -2.68460600 |
| C  | -1.31129000 | -2.59070800 | 0.27912600  |
| H  | -1.62812600 | -3.46325900 | 0.86806000  |
| H  | -2.13649200 | -1.87643600 | 0.27974100  |
| H  | -1.15948500 | -2.93286600 | -0.74809300 |
| C  | 1.59752000  | -3.55617000 | -0.36155200 |
| H  | 1.32092600  | -4.46081700 | 0.19794600  |
| H  | 1.03905000  | -3.58916000 | -1.29971400 |
| H  | 2.66051400  | -3.63406000 | -0.58846300 |
| C  | 3.66011300  | -1.86587000 | 1.46737700  |
| H  | 3.91814800  | -2.51952800 | 2.31173100  |



|   |             |             |             |
|---|-------------|-------------|-------------|
| H | 4.08141800  | -2.32059500 | 0.56816600  |
| H | 4.17150100  | -0.91181000 | 1.63328700  |
| C | 1.91332000  | -0.42172000 | 3.62784500  |
| H | 1.97202300  | -1.21359800 | 4.38863900  |
| H | 2.91491500  | -0.00469000 | 3.50376700  |
| H | 1.26565900  | 0.36678800  | 4.01820500  |
| C | -1.13950200 | -0.70001700 | 2.85456900  |
| H | -1.30318700 | -1.37939400 | 3.70241100  |
| H | -0.96509400 | 0.29776500  | 3.27026100  |
| H | -2.06319200 | -0.66964600 | 2.27500600  |
| O | -0.84413100 | 0.79444800  | 0.22178800  |
| C | -1.79988200 | 1.65480700  | 0.54296500  |
| C | -3.70198000 | 0.31870500  | -0.05638300 |
| C | -2.41082400 | 3.97595400  | 1.48691900  |
| C | -4.45785500 | -0.48275800 | 0.82341900  |
| C | -3.75473000 | 0.01886100  | -1.43111400 |
| H | -1.96055700 | 4.89355900  | 1.88306500  |
| H | -3.02234200 | 4.24234200  | 0.61915500  |
| H | -3.07984100 | 3.56660400  | 2.24990900  |
| C | -5.19420400 | -1.56929400 | 0.35091700  |
| H | -4.46399800 | -0.23402500 | 1.88121500  |
| C | -4.49971000 | -1.06465500 | -1.89945200 |
| H | -3.22968600 | 0.66026000  | -2.12993800 |
| C | -5.21758100 | -1.87237500 | -1.01341600 |
| H | -5.76087500 | -2.17580100 | 1.05329600  |
| H | -4.52294800 | -1.27277800 | -2.96654200 |
| H | -5.79680100 | -2.71465400 | -1.38123400 |
| N | -3.06936900 | 1.46441500  | 0.44001700  |
| C | -1.31571700 | 2.97879400  | 1.11287000  |
| H | -0.62854300 | 3.42628900  | 0.38425000  |
| H | -0.68775400 | 2.75127100  | 1.98238900  |

**Cp\*<sub>2</sub>Ti<sup>III</sup>Cl-Methyl N-phenyl carbamate - CPCM (Entry 32)**

|                                              |              |
|----------------------------------------------|--------------|
| E(UB3LYP)                                    | -2605.463499 |
| Zero-point correction=                       | 0.611854     |
| Thermal correction to Energy=                | 0.651497     |
| Thermal correction to Enthalpy=              | 0.652441     |
| Thermal correction to Gibbs Free Energy=     | 0.541507     |
| Sum of electronic and zero-point Energies=   | -2604.851645 |
| Sum of electronic and thermal Energies=      | -2604.812002 |
| Sum of electronic and thermal Enthalpies=    | -2604.811058 |
| Sum of electronic and thermal Free Energies= | -2604.921991 |

Charge = 0; Multiplicity = 2

|    |             |             |             |
|----|-------------|-------------|-------------|
| Ti | 1.09730500  | 0.09628200  | 0.00506800  |
| C  | 1.35365100  | 0.54523100  | 2.44092300  |
| C  | 0.11321200  | -0.14172000 | 2.33472400  |
| C  | 0.36887300  | -1.45324300 | 1.84532700  |
| C  | 1.78431300  | -1.58429400 | 1.67547300  |
| C  | 2.39266400  | -0.34149700 | 2.01812900  |
| C  | 1.12519100  | 0.45718800  | -2.40583900 |
| C  | 0.20151700  | -0.61409700 | -2.20697100 |
| C  | 0.92115600  | -1.73205900 | -1.70741000 |
| C  | 2.30669200  | -1.36280400 | -1.63439200 |
| C  | 2.42946700  | -0.02087500 | -2.07627400 |
| Cl | 2.21247800  | 2.37171800  | 0.02307000  |
| C  | -1.21727400 | -0.61926600 | -2.70264700 |
| H  | -1.22811800 | -0.71261800 | -3.79823900 |
| H  | -1.79313100 | -1.45627800 | -2.30275000 |
| H  | -1.75246800 | 0.30112800  | -2.45434400 |
| C  | 0.80208500  | 1.76891600  | -3.06420900 |
| H  | 0.91424000  | 1.69844100  | -4.15600200 |
| H  | -0.22983900 | 2.07581100  | -2.86671400 |
| H  | 1.46132500  | 2.56533500  | -2.71009400 |
| C  | 3.73436500  | 0.67510600  | -2.34088600 |
| H  | 4.14673400  | 0.35369100  | -3.30886900 |
| H  | 3.61462700  | 1.75932300  | -2.36852600 |
| H  | 4.48468800  | 0.44293800  | -1.57770800 |
| C  | 3.48013900  | -2.29069200 | -1.46433300 |
| H  | 3.95246100  | -2.47001900 | -2.44077500 |
| H  | 4.25747500  | -1.87789600 | -0.81188600 |
| H  | 3.18831200  | -3.26335000 | -1.06606200 |
| C  | 0.37076300  | -3.12783900 | -1.58886300 |
| H  | 0.40581900  | -3.63576900 | -2.56362700 |
| H  | 0.93980800  | -3.74690600 | -0.89102700 |
| H  | -0.67361300 | -3.13566400 | -1.26398500 |
| C  | -0.60058400 | -2.60505100 | 1.86492600  |
| H  | -0.48724000 | -3.17787100 | 2.79745100  |
| H  | -1.63937700 | -2.26979300 | 1.82395200  |
| H  | -0.44261700 | -3.30823900 | 1.04301800  |
| C  | 2.50257800  | -2.90182800 | 1.57822200  |
| H  | 2.54152800  | -3.36197200 | 2.57677400  |
| H  | 1.99905300  | -3.61759100 | 0.92444700  |
| H  | 3.53374100  | -2.79577300 | 1.23690300  |
| C  | 3.87008600  | -0.06821200 | 2.10649800  |
| H  | 4.25326300  | -0.26472300 | 3.11826600  |
| H  | 4.44224800  | -0.69874900 | 1.41787800  |

|   |             |             |             |
|---|-------------|-------------|-------------|
| H | 4.09481000  | 0.97456300  | 1.86402900  |
| C | 1.54653200  | 1.87368400  | 3.11625400  |
| H | 1.54793100  | 1.74251300  | 4.20849800  |
| H | 2.49225400  | 2.33691000  | 2.83130800  |
| H | 0.74776600  | 2.58349900  | 2.87780900  |
| C | -1.20085100 | 0.37833800  | 2.84672500  |
| H | -1.30136300 | 0.16441000  | 3.92060000  |
| H | -1.28564700 | 1.46304900  | 2.73010500  |
| H | -2.05605000 | -0.08188100 | 2.34602200  |
| O | -1.01517100 | 1.23793600  | -0.08810300 |
| C | -2.01089600 | 1.96435200  | -0.07918200 |
| C | -3.92621900 | 0.29829400  | -0.07247100 |
| C | -0.73106600 | 3.99201800  | -0.07132700 |
| C | -5.33002700 | 0.27240600  | -0.12018000 |
| C | -3.21576200 | -0.90626000 | -0.00888000 |
| H | -0.98725800 | 5.05101300  | -0.03605700 |
| H | -0.13474800 | 3.70685900  | 0.79426200  |
| H | -0.17386600 | 3.75855200  | -0.97828600 |
| C | -6.01185000 | -0.94140400 | -0.10663900 |
| H | -5.88446700 | 1.20637700  | -0.16911900 |
| C | -3.91371300 | -2.11670700 | 0.00183300  |
| H | -2.13580900 | -0.89278800 | 0.02075500  |
| C | -5.30769400 | -2.14681700 | -0.04674900 |
| H | -7.09749400 | -0.94128800 | -0.14407300 |
| H | -3.35221200 | -3.04558900 | 0.04866200  |
| H | -5.83809900 | -3.09424200 | -0.03759500 |
| N | -3.31937400 | 1.57077500  | -0.08747700 |
| H | -3.96309700 | 2.35239200  | -0.09501200 |
| O | -1.99768800 | 3.30883500  | -0.06465000 |

**Cp\*<sub>2</sub>Ti<sup>IV</sup>Cl-Methyl *N*-phenyl carbamate aza-enolate – CPCM (Entry 33)**

|                                              |              |
|----------------------------------------------|--------------|
| E(UB3LYP)                                    | -2604.871469 |
| Zero-point correction=                       | 0.599316     |
| Thermal correction to Energy=                | 0.638299     |
| Thermal correction to Enthalpy=              | 0.639243     |
| Thermal correction to Gibbs Free Energy=     | 0.530067     |
| Sum of electronic and zero-point Energies=   | -2604.272153 |
| Sum of electronic and thermal Energies=      | -2604.233170 |
| Sum of electronic and thermal Enthalpies=    | -2604.232226 |
| Sum of electronic and thermal Free Energies= | -2604.341402 |

Charge = 0; Multiplicity = 1

|    |             |             |             |
|----|-------------|-------------|-------------|
| Ti | -0.97383600 | 0.01655500  | -0.17000400 |
| C  | -1.40129900 | -1.75534800 | -1.90429500 |
| C  | -0.02012500 | -1.75650100 | -1.57761900 |
| C  | 0.10742600  | -2.16813800 | -0.21479600 |
| C  | -1.19817300 | -2.42373200 | 0.29302700  |
| C  | -2.14034800 | -2.11420900 | -0.73892900 |
| C  | -1.79068500 | 2.14095500  | 0.84545900  |
| C  | -0.72704100 | 1.67749200  | 1.65225200  |
| C  | -1.10591800 | 0.42283400  | 2.22496300  |
| C  | -2.45563900 | 0.15720700  | 1.82697400  |
| C  | -2.85428200 | 1.18031400  | 0.92551700  |
| Cl | -1.75201900 | 1.21728300  | -2.09696300 |
| C  | 0.50855800  | 2.44125200  | 2.01784100  |
| H  | 0.34734900  | 2.96762400  | 2.96898100  |
| H  | 1.36852400  | 1.78213300  | 2.15657300  |
| H  | 0.76491700  | 3.18936700  | 1.26550600  |
| C  | -1.86712600 | 3.48723700  | 0.18863200  |
| H  | -2.14546300 | 4.24764400  | 0.93181100  |
| H  | -0.90741500 | 3.77449100  | -0.24693400 |
| H  | -2.61672900 | 3.50513400  | -0.60433100 |
| C  | -4.23177100 | 1.35440200  | 0.35194600  |
| H  | -4.83045200 | 2.01895200  | 0.99031700  |
| H  | -4.19860500 | 1.79686200  | -0.64720400 |
| H  | -4.76682800 | 0.40311900  | 0.28256600  |
| C  | -3.40931300 | -0.78826400 | 2.50101400  |
| H  | -4.02629300 | -0.21146500 | 3.20397000  |
| H  | -4.09729400 | -1.27648500 | 1.80794700  |
| H  | -2.89921300 | -1.55659600 | 3.08136800  |
| C  | -0.31388900 | -0.27597100 | 3.29732500  |
| H  | -0.24381100 | 0.35992600  | 4.19008800  |
| H  | -0.77702800 | -1.21429700 | 3.60734100  |
| H  | 0.71157400  | -0.49462700 | 2.98077300  |
| C  | 1.39241300  | -2.47899300 | 0.49486900  |
| H  | 1.73647300  | -3.48882200 | 0.22997600  |
| H  | 2.18263800  | -1.77628400 | 0.22604200  |
| H  | 1.27367400  | -2.45400800 | 1.58212700  |
| C  | -1.46807300 | -3.24860500 | 1.52067200  |
| H  | -1.18109500 | -4.28783800 | 1.30771300  |
| H  | -0.88409400 | -2.93501200 | 2.38861400  |
| H  | -2.52177400 | -3.25961700 | 1.79844300  |
| C  | -3.61779000 | -2.40087400 | -0.74910900 |
| H  | -3.83237000 | -3.24441300 | -1.41892900 |
| H  | -3.99512400 | -2.67274900 | 0.23817600  |

|   |             |             |             |
|---|-------------|-------------|-------------|
| H | -4.20493700 | -1.55087100 | -1.11369400 |
| C | -1.98242400 | -1.62833700 | -3.27939800 |
| H | -2.08198100 | -2.63148200 | -3.71893800 |
| H | -2.97531200 | -1.17202700 | -3.26731500 |
| H | -1.34677500 | -1.03576700 | -3.94050800 |
| C | 1.10097300  | -1.49866900 | -2.53996900 |
| H | 1.30280500  | -2.39378500 | -3.14418900 |
| H | 0.85899300  | -0.68582800 | -3.23269100 |
| H | 2.02260800  | -1.23654100 | -2.01774100 |
| O | 0.91199300  | 0.57321200  | -0.34411400 |
| C | 1.76260000  | 1.50086700  | -0.68701000 |
| N | 3.04736000  | 1.48367700  | -0.59814500 |
| C | 3.77594400  | 0.42311600  | -0.04504300 |
| C | 2.01790600  | 3.65115300  | -1.68304000 |
| C | 4.49576500  | -0.44589400 | -0.88828300 |
| C | 3.93232300  | 0.27422300  | 1.34627400  |
| H | 1.34797200  | 4.41245600  | -2.08651400 |
| H | 2.60375900  | 4.06089600  | -0.85535300 |
| H | 2.70104900  | 3.29602200  | -2.45938400 |
| C | 5.30606600  | -1.45092300 | -0.35875100 |
| H | 4.41222700  | -0.31595700 | -1.96397900 |
| C | 4.74698600  | -0.73012300 | 1.87135600  |
| H | 3.42232700  | 0.96426300  | 2.01208500  |
| C | 5.43478200  | -1.60366900 | 1.02458700  |
| H | 5.84437700  | -2.11348200 | -1.03225300 |
| H | 4.84794100  | -0.82564900 | 2.94986600  |
| H | 6.06968400  | -2.38345700 | 1.43590700  |
| O | 1.16348500  | 2.59398500  | -1.23208200 |

**Cp<sub>2</sub>Ti<sup>III</sup>Cl – CPCM (Entry 34)**

|                                              |              |
|----------------------------------------------|--------------|
| E(UB3LYP)                                    | -1696.821490 |
| Zero-point correction=                       | 0.170235     |
| Thermal correction to Energy=                | 0.181576     |
| Thermal correction to Enthalpy=              | 0.182520     |
| Thermal correction to Gibbs Free Energy=     | 0.130940     |
| Sum of electronic and zero-point Energies=   | -1696.651255 |
| Sum of electronic and thermal Energies=      | -1696.639914 |
| Sum of electronic and thermal Enthalpies=    | -1696.638970 |
| Sum of electronic and thermal Free Energies= | -1696.690550 |

Charge = 0; Multiplicity = 1

|    |             |             |             |
|----|-------------|-------------|-------------|
| Ti | -0.00174700 | 0.11140200  | -0.01105100 |
| C  | 2.32286200  | 0.26191800  | 0.59109100  |
| C  | 1.78146100  | -0.90046800 | 1.19786000  |
| C  | 1.40500700  | -1.79168900 | 0.15694900  |
| C  | 1.69856200  | -1.17304800 | -1.08962300 |
| C  | 2.27141400  | 0.09395800  | -0.81643100 |
| C  | -2.15676400 | -0.01655100 | 1.03979400  |
| C  | -1.67879900 | -1.34218100 | 0.90760800  |
| C  | -1.57092400 | -1.63293400 | -0.48065100 |
| C  | -1.97392900 | -0.48467100 | -1.20781700 |
| C  | -2.33765400 | 0.51486700  | -0.26507600 |
| H  | 2.67605700  | 1.14270700  | 1.11031100  |
| H  | 1.68451500  | -1.08247300 | 2.26073900  |
| H  | 0.97360600  | -2.77392700 | 0.29233700  |
| H  | 1.51939100  | -1.59612100 | -2.07004200 |
| H  | 2.57736600  | 0.82562700  | -1.55344500 |
| H  | -2.32834000 | 0.50889600  | 1.97115400  |
| H  | -1.42719000 | -2.01273500 | 1.71945300  |
| H  | -1.23313800 | -2.56662700 | -0.91017900 |
| H  | -2.00388500 | -0.38891700 | -2.28600800 |
| H  | -2.67350200 | 1.51515700  | -0.49940900 |
| Cl | 0.10036100  | 2.51778600  | 0.00035200  |

### Cp<sub>2</sub>Ti<sup>IV</sup>Cl(TEMPO) – CPCM (Entry 35)

|                                              |              |
|----------------------------------------------|--------------|
| E(UB3LYP)                                    | -2180.569887 |
| Zero-point correction=                       | 0.436366     |
| Thermal correction to Energy=                | 0.460459     |
| Thermal correction to Enthalpy=              | 0.461403     |
| Thermal correction to Gibbs Free Energy=     | 0.385373     |
| Sum of electronic and zero-point Energies=   | -2180.133521 |
| Sum of electronic and thermal Energies=      | -2180.109428 |
| Sum of electronic and thermal Enthalpies=    | -2180.108484 |
| Sum of electronic and thermal Free Energies= | -2180.184514 |

Charge = 0; Multiplicity = 1

|    |             |             |             |
|----|-------------|-------------|-------------|
| Ti | 1.45694700  | 0.04289900  | 0.00655800  |
| C  | 1.41065400  | 1.72147800  | 1.74736400  |
| C  | 0.62868500  | 0.63800600  | 2.19109300  |
| C  | 1.48200000  | -0.48862300 | 2.33338800  |
| C  | 2.80954900  | -0.06915200 | 2.04440700  |
| C  | 2.76452500  | 1.28134000  | 1.64903300  |
| C  | 1.71085200  | -1.25881300 | -2.09717000 |
| C  | 1.44943200  | -2.18366400 | -1.06589000 |
| C  | 2.52161100  | -2.12949200 | -0.14038600 |
| C  | 3.48388500  | -1.20292100 | -0.63960200 |
| C  | 2.97760300  | -0.66467300 | -1.83790900 |
| H  | 1.04871800  | 2.70656200  | 1.49378200  |
| H  | -0.44793900 | 0.62718400  | 2.28452900  |
| H  | 1.18203900  | -1.47824400 | 2.65132300  |
| H  | 3.69341600  | -0.68918300 | 2.09070500  |
| H  | 3.60531700  | 1.87866100  | 1.32222700  |
| H  | 1.05755700  | -1.02461500 | -2.92722000 |
| H  | 0.56213800  | -2.79120000 | -0.96538500 |
| H  | 2.61832000  | -2.73190500 | 0.75295200  |
| H  | 4.42858000  | -0.94731500 | -0.17971300 |
| H  | 3.45722300  | 0.08989900  | -2.44367400 |
| Cl | 1.79918100  | 2.08599200  | -1.32212300 |
| O  | -0.34997300 | -0.13346300 | -0.28807100 |
| C  | -3.77128800 | 1.27787900  | 0.20586500  |
| C  | -3.76067300 | -1.12358500 | 0.83068600  |
| C  | -4.55240700 | -0.03045600 | 0.11740400  |
| H  | -4.29279100 | 2.08657900  | -0.32053700 |
| H  | -3.70798100 | 1.57656900  | 1.26109400  |
| H  | -4.27387400 | -2.09099500 | 0.76916400  |
| H  | -3.68976700 | -0.86835600 | 1.89665100  |
| H  | -5.53597900 | 0.08823700  | 0.58841200  |
| H  | -4.74354100 | -0.30220500 | -0.92791600 |
| C  | -1.61118900 | 2.48661300  | 0.07170000  |
| H  | -1.54333800 | 2.54043100  | 1.16317500  |
| H  | -0.60813700 | 2.55329700  | -0.35106000 |
| H  | -2.18389100 | 3.35545900  | -0.27339900 |
| C  | -2.37205300 | -2.00905900 | -1.10606200 |
| H  | -1.41353800 | -1.90796700 | -1.61876300 |
| H  | -2.57972500 | -3.07706200 | -0.97411500 |
| H  | -3.14872500 | -1.60620900 | -1.75977000 |
| C  | -2.32984200 | -1.31467700 | 0.27464100  |
| C  | -1.57685700 | -2.22254500 | 1.26629800  |

|   |             |             |             |
|---|-------------|-------------|-------------|
| H | -0.56942600 | -2.46208100 | 0.92131600  |
| H | -1.50272300 | -1.74195100 | 2.24736900  |
| H | -2.12306000 | -3.16455100 | 1.38819200  |
| N | -1.64659700 | 0.02866900  | 0.28883000  |
| C | -2.33453100 | 1.20027100  | -0.36489900 |
| C | -2.35295800 | 1.15328400  | -1.90892200 |
| H | -2.68134600 | 2.12418100  | -2.29721100 |
| H | -1.35097000 | 0.95526100  | -2.29728100 |
| H | -3.03149700 | 0.39563500  | -2.30649000 |



## TEMPOH - CPCM (Entry 36)

|                                              |             |
|----------------------------------------------|-------------|
| E(UB3LYP)                                    | -484.329235 |
| Zero-point correction=                       | 0.274758    |
| Thermal correction to Energy=                | 0.286912    |
| Thermal correction to Enthalpy=              | 0.287856    |
| Thermal correction to Gibbs Free Energy=     | 0.239075    |
| Sum of electronic and zero-point Energies=   | -484.054477 |
| Sum of electronic and thermal Energies=      | -484.042322 |
| Sum of electronic and thermal Enthalpies=    | -484.041378 |
| Sum of electronic and thermal Free Energies= | -484.090159 |

Charge = 0; Multiplicity = 1

|   |             |             |             |
|---|-------------|-------------|-------------|
| C | 0.00000000  | 2.16955700  | 0.01389700  |
| C | 1.25173800  | 1.43258700  | -0.46976400 |
| C | 1.29553400  | -0.04962800 | -0.03226500 |
| C | -1.29553400 | -0.04962800 | -0.03226500 |
| C | -1.25173800 | 1.43258700  | -0.46976400 |
| H | 1.28086000  | 1.47236700  | -1.56724500 |
| H | 2.16260900  | 1.92651700  | -0.10930100 |
| H | 0.00000000  | 2.25256600  | 1.10784000  |
| H | 0.00000000  | 3.19687800  | -0.37107400 |
| H | -1.28086100 | 1.47236700  | -1.56724500 |
| H | -2.16260900 | 1.92651700  | -0.10930100 |
| N | 0.00000000  | -0.66542100 | -0.44436500 |
| C | 2.39588100  | -0.76730900 | -0.83865800 |
| H | 3.36031000  | -0.26819300 | -0.69099400 |
| H | 2.49996900  | -1.80932600 | -0.52202000 |
| H | 2.15812100  | -0.75215700 | -1.90805400 |
| C | 1.63656500  | -0.17933800 | 1.47015700  |
| H | 1.48103200  | -1.20814300 | 1.80596400  |
| H | 2.69080600  | 0.07493200  | 1.63026700  |
| H | 1.04138200  | 0.48329300  | 2.10246300  |
| C | -2.39588100 | -0.76730900 | -0.83865800 |
| H | -2.49996900 | -1.80932600 | -0.52202000 |
| H | -3.36031000 | -0.26819300 | -0.69099400 |
| H | -2.15812100 | -0.75215700 | -1.90805400 |
| C | -1.63656500 | -0.17933800 | 1.47015700  |
| H | -1.48103200 | -1.20814300 | 1.80596400  |
| H | -1.04138200 | 0.48329300  | 2.10246300  |
| H | -2.69080600 | 0.07493200  | 1.63026700  |
| O | 0.00000000  | -2.04297400 | 0.00982500  |
| H | 0.00000000  | -2.53936300 | -0.82397700 |

**Cp\*<sub>2</sub>Ti<sup>III</sup>Cl-Methyl Propionate – CPCM (Entry 37)**

|                                              |              |
|----------------------------------------------|--------------|
| E (UB3LYP)                                   | -2397.683273 |
| Zero-point correction=                       | 0.569978     |
| Thermal correction to Energy=                | 0.606710     |
| Thermal correction to Enthalpy=              | 0.607654     |
| Thermal correction to Gibbs Free Energy=     | 0.503035     |
| Sum of electronic and zero-point Energies=   | -2397.113294 |
| Sum of electronic and thermal Energies=      | -2397.076563 |
| Sum of electronic and thermal Enthalpies=    | -2397.075618 |
| Sum of electronic and thermal Free Energies= | -2397.180238 |

Charge = 0; Multiplicity = 2

|    |             |             |             |
|----|-------------|-------------|-------------|
| Ti | 0.43090700  | 0.04044200  | -0.19579200 |
| C  | 0.03572500  | 2.51801600  | -0.47380800 |
| C  | -0.55898900 | 2.15520000  | 0.76156100  |
| C  | 0.46453100  | 1.68043300  | 1.63456100  |
| C  | 1.70835300  | 1.78946900  | 0.93708200  |
| C  | 1.43594200  | 2.25975100  | -0.38577300 |
| C  | 0.52006400  | -2.34340600 | -0.59749900 |
| C  | 0.69423400  | -2.17529900 | 0.81225500  |
| C  | 1.94818700  | -1.54589200 | 1.02929900  |
| C  | 2.55887000  | -1.32301100 | -0.24818600 |
| C  | 1.68637300  | -1.83180000 | -1.24402500 |
| Cl | -0.36229900 | 0.21060300  | -2.59798900 |
| C  | -0.16257200 | -2.75483500 | 1.90295200  |
| H  | 0.33278100  | -3.62477000 | 2.35801900  |
| H  | -0.35622400 | -2.04030100 | 2.71052500  |
| H  | -1.12558000 | -3.09794600 | 1.51870300  |
| C  | -0.59453500 | -3.09115100 | -1.27574500 |
| H  | -0.31827400 | -4.14115500 | -1.44845800 |
| H  | -1.50795300 | -3.09430800 | -0.67360400 |
| H  | -0.83645100 | -2.64859400 | -2.24627700 |
| C  | 2.04539700  | -1.98624100 | -2.69455600 |
| H  | 2.66659200  | -2.88322600 | -2.83695500 |
| H  | 1.15884400  | -2.08872900 | -3.32273700 |
| H  | 2.62079600  | -1.13302600 | -3.06899000 |
| C  | 3.97801900  | -0.89686800 | -0.51762000 |
| H  | 4.55864200  | -1.74310200 | -0.91056100 |
| H  | 4.04685600  | -0.09737000 | -1.26388000 |
| H  | 4.48507100  | -0.55478100 | 0.38704200  |
| C  | 2.61040200  | -1.46496400 | 2.37807200  |
| H  | 2.85982400  | -2.47734900 | 2.72758200  |
| H  | 3.54253000  | -0.89748900 | 2.35414900  |
| H  | 1.96330700  | -1.02173500 | 3.14124300  |
| C  | 0.26547400  | 1.36802800  | 3.09477800  |
| H  | -0.03363600 | 2.26595100  | 3.65326500  |
| H  | -0.51652600 | 0.61703700  | 3.25827200  |
| H  | 1.18037600  | 0.99195200  | 3.55896400  |
| C  | 3.07269900  | 1.79639200  | 1.57106600  |
| H  | 3.34574400  | 2.83140200  | 1.82339200  |
| H  | 3.10998900  | 1.22451200  | 2.49933500  |
| H  | 3.85266000  | 1.41837000  | 0.90767800  |
| C  | 2.45575300  | 2.64231700  | -1.42462500 |
| H  | 2.68772700  | 3.71644900  | -1.38095600 |
| H  | 3.39911200  | 2.10584400  | -1.28685700 |

|   |             |             |             |
|---|-------------|-------------|-------------|
| H | 2.09724100  | 2.42994600  | -2.43729000 |
| C | -0.65488400 | 3.24360600  | -1.59220800 |
| H | -0.65784000 | 4.32517600  | -1.39094800 |
| H | -0.15566400 | 3.08261000  | -2.54984100 |
| H | -1.69689200 | 2.93070600  | -1.70715300 |
| C | -1.98443200 | 2.42273400  | 1.15320900  |
| H | -2.09311300 | 3.45612500  | 1.51236600  |
| H | -2.67779000 | 2.30883400  | 0.31332000  |
| H | -2.31996300 | 1.76996200  | 1.96323500  |
| O | -1.72402900 | -0.49048400 | 0.36733900  |
| C | -2.92658800 | -0.51669000 | 0.10003100  |
| C | -4.96030300 | 0.28331100  | -1.26045800 |
| H | -5.28730000 | 0.44799000  | -2.29197800 |
| H | -5.66018500 | -0.40972100 | -0.78652900 |
| H | -5.01979800 | 1.24063800  | -0.73179700 |
| C | -3.43738200 | -1.10860500 | 2.36446400  |
| H | -4.36243300 | -1.17188500 | 2.93590000  |
| H | -2.90539000 | -2.05967300 | 2.39357900  |
| H | -2.80023700 | -0.31451600 | 2.75610200  |
| C | -3.52977400 | -0.26597500 | -1.26185500 |
| H | -3.49893300 | -1.23125800 | -1.78698900 |
| H | -2.83831700 | 0.38204000  | -1.80359900 |
| O | -3.84895300 | -0.81097900 | 1.01367900  |
| H | -2.34585300 | -2.42622200 | -1.78280300 |
| C | -2.92961900 | -1.96349500 | 1.08039000  |
| H | -4.00449700 | -1.82172600 | 1.26404100  |
| H | -2.80745500 | -2.83225400 | 0.43111000  |
| H | -2.45906200 | -2.20549400 | 2.03805800  |
| C | -2.02626300 | 0.62480700  | 2.67658800  |
| H | -3.03308000 | 0.94571300  | 2.98103000  |
| H | -1.80935500 | -0.30601600 | 3.21078300  |
| H | -1.32334400 | 1.38315200  | 3.03518200  |
| C | 1.52865100  | 2.91825400  | -0.56415800 |
| H | 1.13241400  | 3.51015700  | 0.26253800  |
| H | 2.53038200  | 3.31162100  | -0.78985700 |
| H | 0.91011600  | 3.10944000  | -1.44641800 |

**Cp\*<sub>2</sub>Ti<sup>IV</sup>Cl-Methyl Propionate Enolate – CPCM (Entry 38)**

|                                              |              |
|----------------------------------------------|--------------|
| E(UB3LYP)                                    | -2397.059822 |
| Zero-point correction=                       | 0.557912     |
| Thermal correction to Energy=                | 0.593926     |
| Thermal correction to Enthalpy=              | 0.594870     |
| Thermal correction to Gibbs Free Energy=     | 0.493397     |
| Sum of electronic and zero-point Energies=   | -2396.501910 |
| Sum of electronic and thermal Energies=      | -2396.465896 |
| Sum of electronic and thermal Enthalpies=    | -2396.464952 |
| Sum of electronic and thermal Free Energies= | -2396.566425 |

Charge = 0; Multiplicity = 1

|    |             |             |             |
|----|-------------|-------------|-------------|
| Ti | 0.27368400  | 0.02169400  | -0.17913900 |
| C  | -0.46852800 | 2.40896600  | -0.18486700 |
| C  | -0.66544100 | 1.91247900  | 1.12487800  |
| C  | 0.60918000  | 1.57111800  | 1.67508900  |
| C  | 1.60881700  | 1.94122500  | 0.71456100  |
| C  | 0.94490800  | 2.41131800  | -0.44417900 |
| C  | 0.55935400  | -2.42156300 | -0.47918100 |
| C  | 0.88011500  | -2.11652500 | 0.87669600  |
| C  | 2.08357100  | -1.35304800 | 0.88729700  |
| C  | 2.48540600  | -1.14699000 | -0.46777000 |
| C  | 1.56251400  | -1.84211500 | -1.30297400 |
| Cl | -0.12386900 | 0.33206000  | -2.55200500 |
| C  | 0.22956400  | -2.69923500 | 2.09815200  |
| H  | 0.86111600  | -3.49540200 | 2.51682500  |
| H  | 0.08275400  | -1.96023300 | 2.89284800  |
| H  | -0.73995300 | -3.14076200 | 1.86482300  |
| C  | -0.56403300 | -3.29699800 | -0.94889400 |
| H  | -0.27980200 | -4.35718800 | -0.90444600 |
| H  | -1.45563400 | -3.16493900 | -0.33158200 |
| H  | -0.83930100 | -3.07445900 | -1.98417600 |
| C  | 1.77479500  | -2.10695200 | -2.76279600 |
| H  | 2.44623500  | -2.97042800 | -2.87776600 |
| H  | 0.84223900  | -2.33838500 | -3.28129600 |
| H  | 2.23869000  | -1.25750200 | -3.27009100 |
| C  | 3.79540700  | -0.58932700 | -0.95558800 |
| H  | 4.40259800  | -1.39073700 | -1.39770300 |
| H  | 3.66788400  | 0.17359600  | -1.73241200 |
| H  | 4.38118400  | -0.15067700 | -0.14595100 |
| C  | 2.94823100  | -1.20037100 | 2.10694100  |
| H  | 3.47447200  | -2.15038800 | 2.27969900  |
| H  | 3.71405300  | -0.43135900 | 2.00014500  |
| H  | 2.37165700  | -0.99310500 | 3.01019100  |
| C  | 0.82131700  | 1.26579500  | 3.13422100  |
| H  | 0.48340700  | 2.11472100  | 3.74405300  |
| H  | 0.25442900  | 0.39112100  | 3.47223100  |
| H  | 1.87306800  | 1.09826200  | 3.37024900  |
| C  | 3.07180900  | 2.15310200  | 0.98313700  |
| H  | 3.22889000  | 3.20652800  | 1.25546700  |
| H  | 3.44532400  | 1.55378200  | 1.81356900  |
| H  | 3.69459200  | 1.95772000  | 0.10789000  |
| C  | 1.61197500  | 3.02687200  | -1.64021200 |
| H  | 1.82777000  | 4.08766700  | -1.44908400 |
| H  | 2.56347200  | 2.53982400  | -1.87596400 |

|   |             |             |             |
|---|-------------|-------------|-------------|
| H | 0.97730900  | 2.96825300  | -2.52679600 |
| C | -1.50437700 | 3.03540300  | -1.07262800 |
| H | -1.45777500 | 4.13022200  | -0.98794700 |
| H | -1.34105900 | 2.77700700  | -2.12204100 |
| H | -2.51397500 | 2.71796700  | -0.80376300 |
| C | -1.94406700 | 1.91319900  | 1.90750000  |
| H | -1.98045200 | 2.80738000  | 2.54585300  |
| H | -2.82225600 | 1.92946700  | 1.26054600  |
| H | -2.02566500 | 1.04224400  | 2.56274600  |
| O | -1.49117400 | -0.63398700 | 0.18084000  |
| C | -2.79525200 | -0.42446000 | -0.00868100 |
| C | -4.84986800 | 0.13922900  | -1.37451100 |
| H | -5.14625800 | -0.33301800 | -2.32199100 |
| H | -5.41747200 | -0.33583900 | -0.56968700 |
| H | -5.18136300 | 1.18747300  | -1.43775000 |
| C | -3.24377900 | -1.75126900 | 1.95176000  |
| H | -4.07035100 | -1.84620300 | 2.65977900  |
| H | -3.11991200 | -2.70186700 | 1.41776800  |
| H | -2.32566000 | -1.51961800 | 2.49675200  |
| C | -3.36813700 | 0.02553900  | -1.14567100 |
| H | -2.69861600 | 0.33742600  | -1.93780900 |
| O | -3.61280100 | -0.69891100 | 1.06644600  |

### Methyl Propionate – CPCM (Entry 39)

|                                              |             |
|----------------------------------------------|-------------|
| E (UB3LYP)                                   | -307.708334 |
| Zero-point correction=                       | 0.118833    |
| Thermal correction to Energy=                | 0.126252    |
| Thermal correction to Enthalpy=              | 0.127196    |
| Thermal correction to Gibbs Free Energy=     | 0.086966    |
| Sum of electronic and zero-point Energies=   | -307.589501 |
| Sum of electronic and thermal Energies=      | -307.582082 |
| Sum of electronic and thermal Enthalpies=    | -307.581138 |
| Sum of electronic and thermal Free Energies= | -307.621368 |

Charge = 0; Multiplicity = 1

|   |             |             |             |
|---|-------------|-------------|-------------|
| O | -0.10688200 | 1.30417700  | -0.00004500 |
| C | -0.05209000 | 0.08925900  | 0.00001000  |
| C | -2.41557500 | -0.02123500 | 0.00001400  |
| H | -3.16869300 | -0.80891500 | -0.00021600 |
| H | -2.51668700 | 0.60251500  | 0.89172100  |
| H | -2.51647900 | 0.60285300  | -0.89147800 |
| O | -1.14562300 | -0.70069200 | 0.00004200  |
| C | 2.48780600  | 0.10741400  | 0.00006400  |
| H | 2.53379400  | 0.75068000  | -0.88417800 |
| H | 2.53380700  | 0.75037500  | 0.88452800  |
| H | 3.37141400  | -0.53837000 | -0.00005100 |
| C | 1.21673500  | -0.73925200 | -0.00007700 |
| H | 1.18083200  | -1.40193400 | -0.87394100 |
| H | 1.18079800  | -1.40220100 | 0.87357900  |

### Methyl Propionate Enolate Radical – CPCM (Entry 40)

|                                              |             |
|----------------------------------------------|-------------|
| E (UB3LYP)                                   | -307.053823 |
| Zero-point correction=                       | 0.105149    |
| Thermal correction to Energy=                | 0.112505    |
| Thermal correction to Enthalpy=              | 0.113449    |
| Thermal correction to Gibbs Free Energy=     | 0.073190    |
| Sum of electronic and zero-point Energies=   | -306.948674 |
| Sum of electronic and thermal Energies=      | -306.941318 |
| Sum of electronic and thermal Enthalpies=    | -306.940374 |
| Sum of electronic and thermal Free Energies= | -306.980632 |

Charge = 0; Multiplicity = 2

|   |             |             |             |
|---|-------------|-------------|-------------|
| O | -0.10897100 | 1.31817300  | 0.00001900  |
| C | -0.02379000 | 0.09215700  | 0.00000300  |
| C | -2.38497300 | -0.06054600 | -0.00003500 |
| H | -3.13041800 | -0.85587700 | -0.00086300 |
| H | -2.49618300 | 0.56330500  | 0.89123000  |
| H | -2.49546000 | 0.56454600  | -0.89050600 |
| O | -1.11135300 | -0.72377300 | 0.00004100  |
| C | 2.53834000  | 0.00196700  | -0.00001500 |
| H | 3.12812000  | -0.29905000 | 0.87817400  |
| H | 3.12811400  | -0.29907300 | -0.87820000 |
| H | 2.43441500  | 1.08936800  | -0.00002800 |
| C | 1.21206500  | -0.66235500 | -0.00000300 |
| H | 1.14415600  | -1.74575900 | 0.00001600  |

### N-Phenyl Propanamide – BF<sub>3</sub> Adduct (Entry 41)

|                                              |             |
|----------------------------------------------|-------------|
| E(UB3LYP)                                    | -804.157683 |
| Zero-point correction=                       | 0.200225    |
| Thermal correction to Energy=                | 0.214639    |
| Thermal correction to Enthalpy=              | 0.215583    |
| Thermal correction to Gibbs Free Energy=     | 0.156601    |
| Sum of electronic and zero-point Energies=   | -803.957459 |
| Sum of electronic and thermal Energies=      | -803.943045 |
| Sum of electronic and thermal Enthalpies=    | -803.942100 |
| Sum of electronic and thermal Free Energies= | -804.001082 |

Charge = 0; Multiplicity = 1

|   |             |             |             |
|---|-------------|-------------|-------------|
| C | -0.67200700 | -0.80461700 | 0.26948200  |
| N | 0.61686300  | -1.18827300 | 0.31152700  |
| H | 0.76529200  | -2.17116500 | 0.50149600  |
| C | 1.81367100  | -0.43901500 | 0.12364300  |
| C | 3.00943600  | -1.17017900 | 0.16556500  |
| C | 1.84388800  | 0.94747200  | -0.08196700 |
| C | 4.23165400  | -0.52548100 | 0.00236000  |
| H | 2.98218100  | -2.24655400 | 0.32533000  |
| C | 3.07920100  | 1.57652200  | -0.24339800 |
| H | 0.92807100  | 1.51948200  | -0.11417600 |
| C | 4.27197300  | 0.85458200  | -0.20375200 |
| H | 5.15019800  | -1.10413200 | 0.03656500  |
| H | 3.09943500  | 2.65086900  | -0.40195500 |
| H | 5.22405000  | 1.36106100  | -0.33151300 |
| C | -1.71177000 | -1.88014000 | 0.47991100  |
| H | -1.28170300 | -2.69377800 | 1.07619300  |
| H | -2.52234100 | -1.42920600 | 1.05557100  |
| C | -2.25258300 | -2.42170400 | -0.86041400 |
| H | -3.00809300 | -3.18816200 | -0.66280700 |
| H | -2.71499700 | -1.61446600 | -1.43051100 |
| H | -1.45662400 | -2.87492200 | -1.46192800 |
| O | -0.95125100 | 0.39656300  | 0.02454300  |
| F | -2.07675700 | 2.43898600  | -0.04185600 |
| F | -3.07416500 | 0.63831900  | -1.07361100 |
| F | -3.00550900 | 0.75185000  | 1.22191000  |
| B | -2.42927800 | 1.12986800  | 0.03282700  |



## N-Phenyl Propanamidyl Radical – BF<sub>3</sub> Adduct (Entry 42)

|                                              |             |
|----------------------------------------------|-------------|
| E(UB3LYP)                                    | -803.499472 |
| Zero-point correction=                       | 0.185880    |
| Thermal correction to Energy=                | 0.200305    |
| Thermal correction to Enthalpy=              | 0.201249    |
| Thermal correction to Gibbs Free Energy=     | 0.141612    |
| Sum of electronic and zero-point Energies=   | -803.313592 |
| Sum of electronic and thermal Energies=      | -803.299167 |
| Sum of electronic and thermal Enthalpies=    | -803.298223 |
| Sum of electronic and thermal Free Energies= | -803.357860 |

Charge = 0; Multiplicity = 2

|   |             |             |             |
|---|-------------|-------------|-------------|
| C | -0.61237800 | -0.71580400 | 0.15898400  |
| N | 0.63010900  | -1.19717100 | -0.07398900 |
| C | 1.76940400  | -0.49269700 | -0.02741100 |
| C | 2.93965300  | -1.10653900 | -0.57947100 |
| C | 1.89422700  | 0.80104500  | 0.58160000  |
| C | 4.15625700  | -0.45463700 | -0.54393800 |
| H | 2.82860300  | -2.08890100 | -1.02642700 |
| C | 3.12172900  | 1.43336900  | 0.60800700  |
| H | 1.01545100  | 1.27665500  | 1.00120000  |
| C | 4.25535900  | 0.81663000  | 0.04854000  |
| H | 5.03765300  | -0.92268300 | -0.97183500 |
| H | 3.21191100  | 2.41505300  | 1.06331200  |
| H | 5.21435700  | 1.32566500  | 0.07689700  |
| C | -1.54231300 | -1.63300800 | 0.91039300  |
| H | -0.94960500 | -2.17845300 | 1.65292000  |
| H | -2.28349100 | -1.01904200 | 1.42400200  |
| C | -2.22938600 | -2.63526600 | -0.04300000 |
| H | -2.86991300 | -3.30465200 | 0.53970300  |
| H | -2.84838500 | -2.10005300 | -0.76496600 |
| H | -1.48961800 | -3.24135100 | -0.57510500 |
| O | -0.95786200 | 0.38580400  | -0.34738200 |
| F | -2.26489900 | 2.26717400  | -0.87827500 |
| F | -3.32186700 | 0.22342100  | -0.79701100 |
| F | -2.62202600 | 1.23595000  | 1.14701300  |
| B | -2.45020600 | 1.10281300  | -0.21010000 |

### Cp\*<sub>2</sub>Ti<sup>III</sup>Cl-Explicitly Bound MeCN (Entry 43)

|                                              |              |
|----------------------------------------------|--------------|
| E(UB3LYP)                                    | -2222.730504 |
| Zero-point correction=                       | 0.496593     |
| Thermal correction to Energy=                | 0.529649     |
| Thermal correction to Enthalpy=              | 0.530593     |
| Thermal correction to Gibbs Free Energy=     | 0.433716     |
| Sum of electronic and zero-point Energies=   | -2222.233911 |
| Sum of electronic and thermal Energies=      | -2222.200855 |
| Sum of electronic and thermal Enthalpies=    | -2222.199911 |
| Sum of electronic and thermal Free Energies= | -2222.296788 |

Charge = 0; Multiplicity = 2

|    |             |             |             |
|----|-------------|-------------|-------------|
| Ti | 0.02316900  | 0.02111200  | -0.16281700 |
| C  | 0.99864000  | -2.17610500 | -0.64190100 |
| C  | 0.98961400  | -2.07335700 | 0.77968500  |
| C  | -0.35995600 | -2.02542000 | 1.21730000  |
| C  | -1.19730200 | -2.12237400 | 0.06025200  |
| C  | -0.35915500 | -2.20074300 | -1.08898700 |
| C  | -0.23684900 | 2.43539800  | 0.06084500  |
| C  | -0.53301800 | 1.85049600  | 1.33560900  |
| C  | -1.73641000 | 1.10515500  | 1.20165600  |
| C  | -2.17410400 | 1.21177000  | -0.15929900 |
| C  | -1.26320800 | 2.05105200  | -0.84878900 |
| Cl | 1.01747300  | 0.51146600  | -2.39661000 |
| C  | 0.18313900  | 2.13100000  | 2.62933600  |
| H  | -0.23267800 | 3.01800200  | 3.12860700  |
| H  | 0.09985300  | 1.29701000  | 3.33446500  |
| H  | 1.24938500  | 2.32102000  | 2.47357500  |
| C  | 0.85650500  | 3.41956000  | -0.24951800 |
| H  | 0.44947900  | 4.43551200  | -0.34649300 |
| H  | 1.60964400  | 3.45179100  | 0.54391600  |
| H  | 1.36057200  | 3.17070200  | -1.18929100 |
| C  | -1.45187700 | 2.57320900  | -2.24360800 |
| H  | -2.11078800 | 3.45451300  | -2.23001400 |
| H  | -0.50267600 | 2.86001100  | -2.69905100 |
| H  | -1.91038100 | 1.82769600  | -2.89999600 |
| C  | -3.49966700 | 0.76743700  | -0.71685600 |
| H  | -4.18091300 | 1.62501100  | -0.81198200 |
| H  | -3.40213700 | 0.32895400  | -1.71638000 |
| H  | -3.99343600 | 0.03366600  | -0.07674400 |
| C  | -2.57267600 | 0.61539200  | 2.35129800  |
| H  | -3.24356900 | 1.41897100  | 2.68911000  |
| H  | -3.20755100 | -0.23362800 | 2.08621500  |
| H  | -1.96715600 | 0.32370000  | 3.21271000  |
| C  | -0.77904100 | -2.17836800 | 2.65493300  |
| H  | -0.54780000 | -3.19285800 | 3.01130700  |
| H  | -0.25714700 | -1.48404300 | 3.32408000  |
| H  | -1.85096900 | -2.02793500 | 2.79223800  |
| C  | -2.67023600 | -2.42626900 | 0.06691600  |
| H  | -2.82394500 | -3.51370200 | 0.12318700  |
| H  | -3.19003700 | -1.98883800 | 0.92296200  |
| H  | -3.17143500 | -2.08062200 | -0.84056000 |
| C  | -0.81077800 | -2.43071000 | -2.50522400 |
| H  | -0.76618900 | -3.49820300 | -2.76509400 |

|   |             |             |             |
|---|-------------|-------------|-------------|
| H | -1.84425300 | -2.10276300 | -2.65857500 |
| H | -0.18497800 | -1.88062600 | -3.21292100 |
| C | 2.21079700  | -2.40888200 | -1.49758500 |
| H | 2.45198600  | -3.48103000 | -1.53991100 |
| H | 2.05331700  | -2.04969100 | -2.51578500 |
| H | 3.09297200  | -1.89021200 | -1.10776500 |
| C | 2.17779100  | -2.18792600 | 1.69344800  |
| H | 2.25933700  | -3.20884000 | 2.09330900  |
| H | 3.11484600  | -1.97300000 | 1.17198900  |
| H | 2.10586800  | -1.51171400 | 2.55287500  |
| N | 2.04551500  | 0.58639900  | 0.41748700  |
| C | 3.14650000  | 0.91002800  | 0.57102500  |
| C | 4.53638400  | 1.32448100  | 0.71420800  |
| H | 4.99558700  | 1.41624500  | -0.27558200 |
| H | 4.59265500  | 2.29356800  | 1.21996300  |
| H | 5.09661400  | 0.58821300  | 1.29911800  |

### Cp<sub>2</sub>Ti<sup>III</sup>Cl-Explicitly Bound MeCN (Entry 44)

|                                              |              |
|----------------------------------------------|--------------|
| E(UB3LYP)                                    | -1829.575434 |
| Zero-point correction=                       | 0.217690     |
| Thermal correction to Energy=                | 0.233991     |
| Thermal correction to Enthalpy=              | 0.234935     |
| Thermal correction to Gibbs Free Energy=     | 0.171087     |
| Sum of electronic and zero-point Energies=   | -1829.357744 |
| Sum of electronic and thermal Energies=      | -1829.341443 |
| Sum of electronic and thermal Enthalpies=    | -1829.340499 |
| Sum of electronic and thermal Free Energies= | -1829.404347 |

Charge = 0; Multiplicity = 2

|    |             |             |             |
|----|-------------|-------------|-------------|
| Ti | -0.34219000 | 0.00103600  | 0.03531000  |
| C  | -0.17180400 | 2.37234200  | 0.36266800  |
| C  | -0.08991800 | 2.18176200  | -1.04055500 |
| C  | -1.31839200 | 1.64461300  | -1.48464500 |
| C  | -2.17391000 | 1.52390800  | -0.35422900 |
| C  | -1.46857700 | 1.97537900  | 0.78529100  |
| C  | 0.04429200  | -2.36262400 | -0.20707500 |
| C  | -0.43345300 | -1.86970800 | -1.45701800 |
| C  | -1.76658400 | -1.44371400 | -1.26558500 |
| C  | -2.11248100 | -1.66433400 | 0.09860100  |
| C  | -1.00011500 | -2.25174900 | 0.73983300  |
| Cl | 0.58052800  | -0.04796000 | 2.31816100  |
| N  | 1.79953000  | 0.01228500  | -0.47866200 |
| C  | 2.95004800  | 0.00652400  | -0.60193100 |
| C  | 4.40294500  | -0.00471100 | -0.71387100 |
| H  | 4.75704400  | 0.93705700  | -1.14468400 |
| H  | 4.84591400  | -0.12884600 | 0.27962500  |
| H  | 4.72814600  | -0.83078400 | -1.35403700 |
| H  | -3.06441000 | -1.43505300 | 0.56059000  |
| H  | -2.41354900 | -1.02138000 | -2.02272800 |
| H  | 0.12030600  | -1.83803700 | -2.38714700 |
| H  | 1.03609200  | -2.74511600 | -0.00717600 |
| H  | -0.92799400 | -2.49732100 | 1.78927400  |
| H  | 0.61831200  | 2.72677600  | 1.00920700  |
| H  | 0.77331200  | 2.38435600  | -1.66140700 |
| H  | -1.56479000 | 1.37877800  | -2.50457700 |
| H  | -3.18879700 | 1.14809600  | -0.36535400 |
| H  | -1.82940700 | 1.98190700  | 1.80459500  |

### Cp\*<sub>2</sub>Ti<sup>III</sup>Cl-Explicitly Bound MeCN – CPCM (Solvent = Acetonitrile) (Entry 45)

|                                              |              |
|----------------------------------------------|--------------|
| E(UB3LYP)                                    | -2222.748010 |
| Zero-point correction=                       | 0.496689     |
| Thermal correction to Energy=                | 0.529401     |
| Thermal correction to Enthalpy=              | 0.530346     |
| Thermal correction to Gibbs Free Energy=     | 0.435064     |
| Sum of electronic and zero-point Energies=   | -2222.251320 |
| Sum of electronic and thermal Energies=      | -2222.218608 |
| Sum of electronic and thermal Enthalpies=    | -2222.217664 |
| Sum of electronic and thermal Free Energies= | -2222.312946 |

Charge = 0; Multiplicity = 2

|    |             |             |             |
|----|-------------|-------------|-------------|
| Ti | -0.01232600 | -0.02485500 | -0.18679500 |
| C  | -1.27715000 | 2.00445900  | -0.66963700 |
| C  | -1.30197100 | 1.88680000  | 0.75234700  |
| C  | 0.02290000  | 2.03871900  | 1.23633700  |
| C  | 0.87793000  | 2.26935900  | 0.11070900  |
| C  | 0.07598200  | 2.24534400  | -1.06620100 |
| C  | 0.56439100  | -2.38170300 | 0.05672400  |
| C  | 0.69529200  | -1.76692700 | 1.34562000  |
| C  | 1.79369200  | -0.86433200 | 1.28517700  |
| C  | 2.32835300  | -0.90214700 | -0.04428600 |
| C  | 1.58626500  | -1.85585600 | -0.78582900 |
| Cl | -0.75363900 | -0.61749200 | -2.56868800 |
| C  | -0.06229100 | -2.13977000 | 2.59202800  |
| H  | 0.45210300  | -2.94014800 | 3.14284000  |
| H  | -0.16320100 | -1.29166500 | 3.27723100  |
| H  | -1.06947500 | -2.50048300 | 2.36546500  |
| C  | -0.35426100 | -3.51346700 | -0.31209700 |
| H  | 0.18873600  | -4.46895600 | -0.31920500 |
| H  | -1.17925600 | -3.61829500 | 0.39774700  |
| H  | -0.78354500 | -3.37189200 | -1.30913800 |
| C  | 1.95179500  | -2.35139300 | -2.15529400 |
| H  | 2.73953100  | -3.11608900 | -2.08177700 |
| H  | 1.09676000  | -2.79608800 | -2.66750500 |
| H  | 2.33756900  | -1.54818500 | -2.79111600 |
| C  | 3.61864900  | -0.28530200 | -0.51487000 |
| H  | 4.40608100  | -1.05007300 | -0.57586400 |
| H  | 3.53031300  | 0.15720800  | -1.51359100 |
| H  | 3.97708100  | 0.49145100  | 0.16317100  |
| C  | 2.48333600  | -0.26970200 | 2.48217600  |
| H  | 3.23515600  | -0.97763800 | 2.86075300  |
| H  | 3.01278700  | 0.65771200  | 2.25162700  |
| H  | 1.79347700  | -0.06813700 | 3.30445800  |
| C  | 0.35912700  | 2.23414100  | 2.69062300  |
| H  | -0.06913800 | 3.18128400  | 3.04880600  |
| H  | -0.05150200 | 1.44343200  | 3.32844700  |
| H  | 1.43493200  | 2.28132300  | 2.86740300  |
| C  | 2.29682000  | 2.76517400  | 0.16488100  |
| H  | 2.30767400  | 3.86434000  | 0.19559200  |
| H  | 2.83100600  | 2.41796900  | 1.05239900  |

|   |             |             |             |
|---|-------------|-------------|-------------|
| H | 2.87461000  | 2.46548300  | -0.71302900 |
| C | 0.54336900  | 2.59971900  | -2.45137200 |
| H | 0.46080700  | 3.68202600  | -2.62851300 |
| H | 1.59249800  | 2.32780400  | -2.60908200 |
| H | -0.04923900 | 2.08922500  | -3.21432900 |
| C | -2.48830900 | 2.06981100  | -1.55713000 |
| H | -2.92527700 | 3.07871800  | -1.54131900 |
| H | -2.23762000 | 1.82739700  | -2.59143900 |
| H | -3.27021100 | 1.37343100  | -1.23614800 |
| C | -2.52518300 | 1.81212700  | 1.62352200  |
| H | -2.75687600 | 2.80235700  | 2.04121000  |
| H | -3.40583000 | 1.48404100  | 1.06531600  |
| H | -2.39065800 | 1.13113300  | 2.47092700  |
| N | -1.97078100 | -0.87435600 | 0.25735400  |
| C | -3.01925600 | -1.32509300 | 0.45590200  |
| C | -4.33838800 | -1.89195400 | 0.70121700  |
| H | -4.92182000 | -1.89146300 | -0.22427100 |
| H | -4.24053700 | -2.92076900 | 1.05994300  |
| H | -4.86499200 | -1.29981300 | 1.45540600  |

**Cp\*<sub>2</sub>Ti<sup>III</sup>Cl-Explicitly Bound MeCN – CPCM (Solvent = Acetonitrile) (Entry 45)**

|                                              |             |
|----------------------------------------------|-------------|
| E (UB3LYP)                                   | -132.762631 |
| Zero-point correction=                       | 0.045629    |
| Thermal correction to Energy=                | 0.049200    |
| Thermal correction to Enthalpy=              | 0.050145    |
| Thermal correction to Gibbs Free Energy=     | 0.022671    |
| Sum of electronic and zero-point Energies=   | -132.717002 |
| Sum of electronic and thermal Energies=      | -132.713431 |
| Sum of electronic and thermal Enthalpies=    | -132.712486 |
| Sum of electronic and thermal Free Energies= | -132.739960 |

Charge = 0; Multiplicity = 1

|   |             |             |             |
|---|-------------|-------------|-------------|
| C | 0.00000000  | 0.00000000  | 0.27890300  |
| C | 0.00000000  | 0.00000000  | -1.18049100 |
| H | 0.00000000  | 1.02719900  | -1.55675000 |
| H | 0.88958000  | -0.51360000 | -1.55675000 |
| H | -0.88958000 | -0.51360000 | -1.55675000 |
| N | 0.00000000  | 0.00000000  | 1.43996800  |

## VII. EPR Experiments

Experiment was run in anhydrous, degassed MeCN in sealed microcapillaries.  $g_{\text{iso}} = 2.003$ ,  $A_{\text{iso}} = 44$ ,  $I_{\text{wpp}} = 0.455$ , microwave frequency = 9.764 GHz, power, = 0.6325 mW, modulation amplitude = 0.1 mT/100 kHz, temperature = 23 °C.

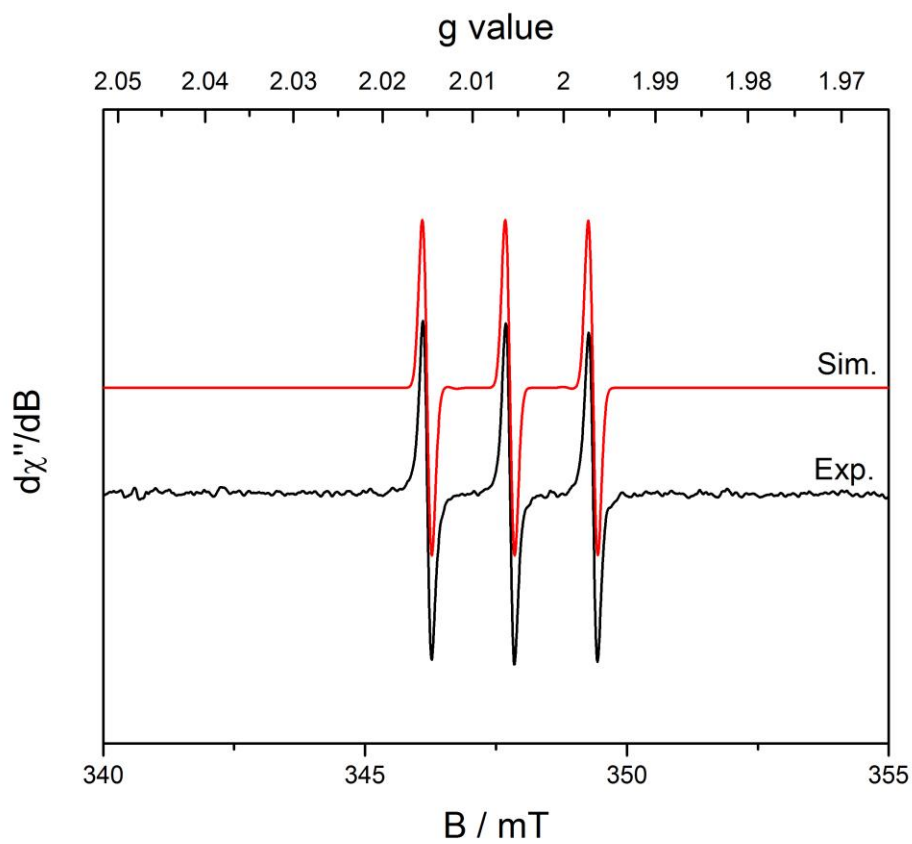

Figure S29 EPR of TEMPO in MeCN



Experiment was run in anhydrous, degassed MeCN in sealed microcapillaries.  $g_{\text{iso}} = 1.98$ ,  $lwpp = 0.455$ , microwave frequency = 9.384 GHz, power, = 0.6325 mW, modulation amplitude = 0.1 mT/100 kHz, temperature = 23 °C.

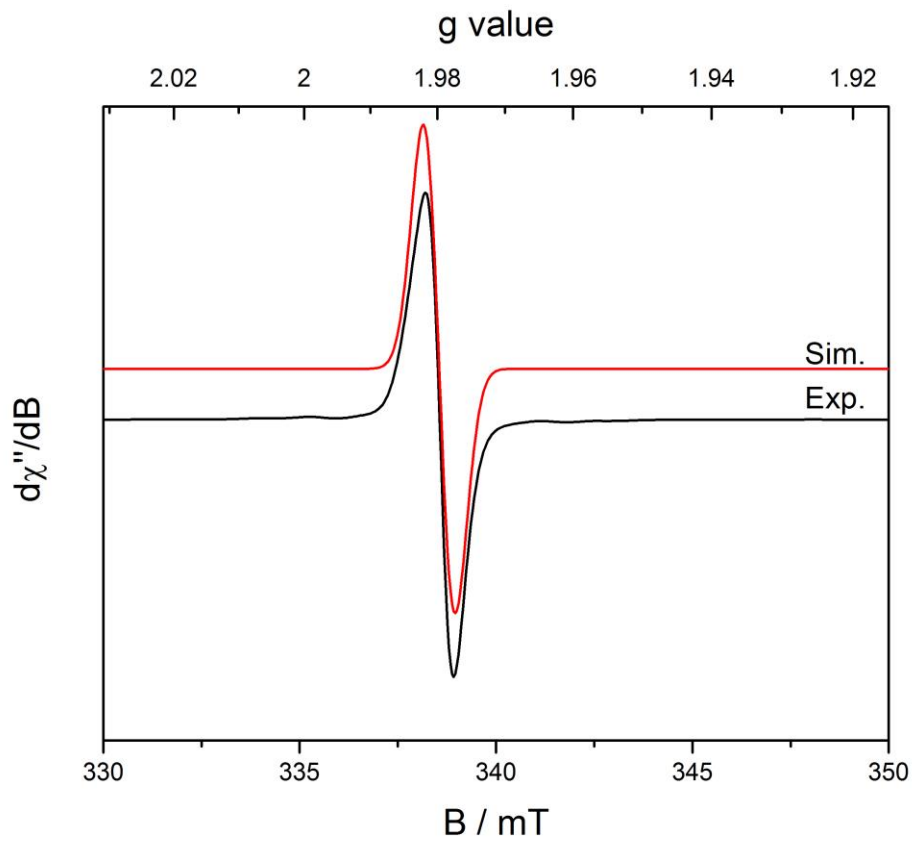

**Figure S30** EPR of  $\text{Cp}^*_2\text{TiCl}$  in MeCN

Experiment was run in anhydrous, degassed MeCN in sealed microcapillaries. Microwave frequency = 9.763 GHz, power, = 0.6325 mW, modulation amplitude = 0.1 mT/100 kHz, temperature = 23 °C. TEMPO  $g_{iso} = 2.003$ , TEMPO  $A_{iso} = 44$ , TEMPO  $lwpp = 0.455$ ; Cp\*<sub>2</sub>TiCl  $g_{iso} = 1.98$ , Ti  $lwpp = 0.455$ . Values for both Cp\*<sub>2</sub>TiCl and TEMPO are unchanged in the presence of each other.

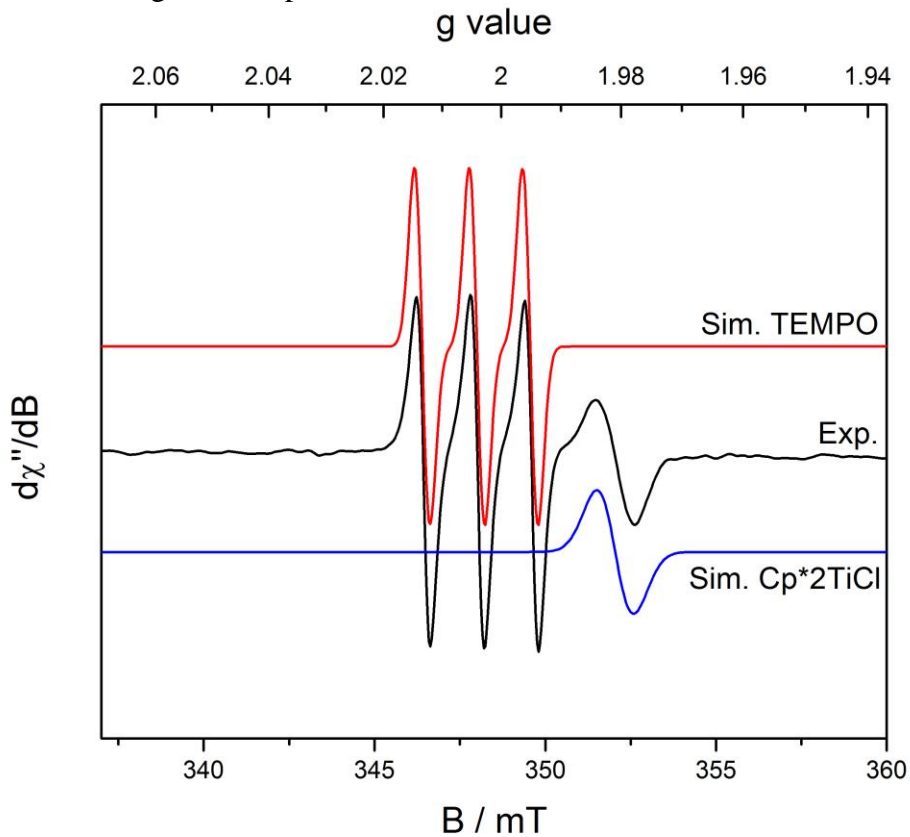

Figure S31 EPR of 1:1 TEMPO, Cp\*<sub>2</sub>TiCl

### VIII. CV Experiments

Experiment was performed at 23 °C in MeCN at 1 mM of  $\text{Cp}^*\text{TiCl}_2$  using 0.1 M  $\text{NBu}_4\text{PF}_6$  as supporting electrolyte. Scan rate (V/s) = 0.05. Platinum mesh electrode was used for a counter electrode. SCE reference electrode, glassy carbon working electrode.

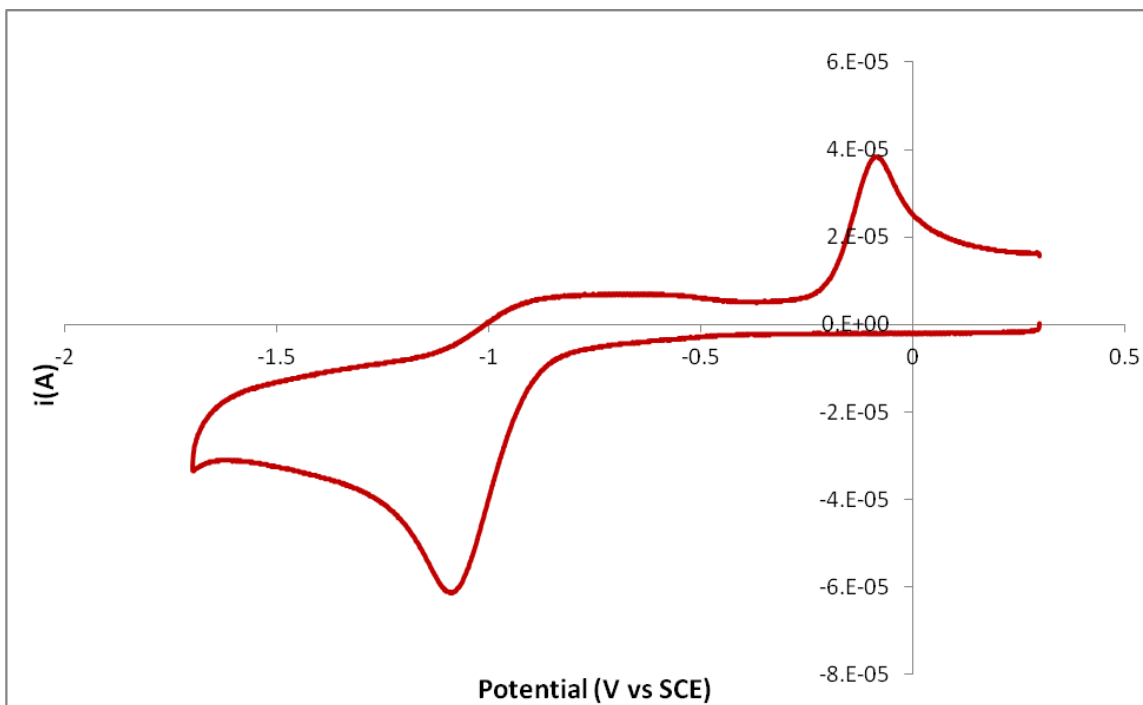

Figure S32 Reduction of  $\text{Cp}^*\text{TiCl}_2$  in MeCN
